# Supplementary material for: Complete Genome of Rose Myrtle, Rhodomyrtus tomentosa, and Its Population Genetics in Thai Peninsula
Source: MDPI journal article supplement (doi:10.3390/plants12081582), 2023-04-07
Supplement: s1 [file s1]

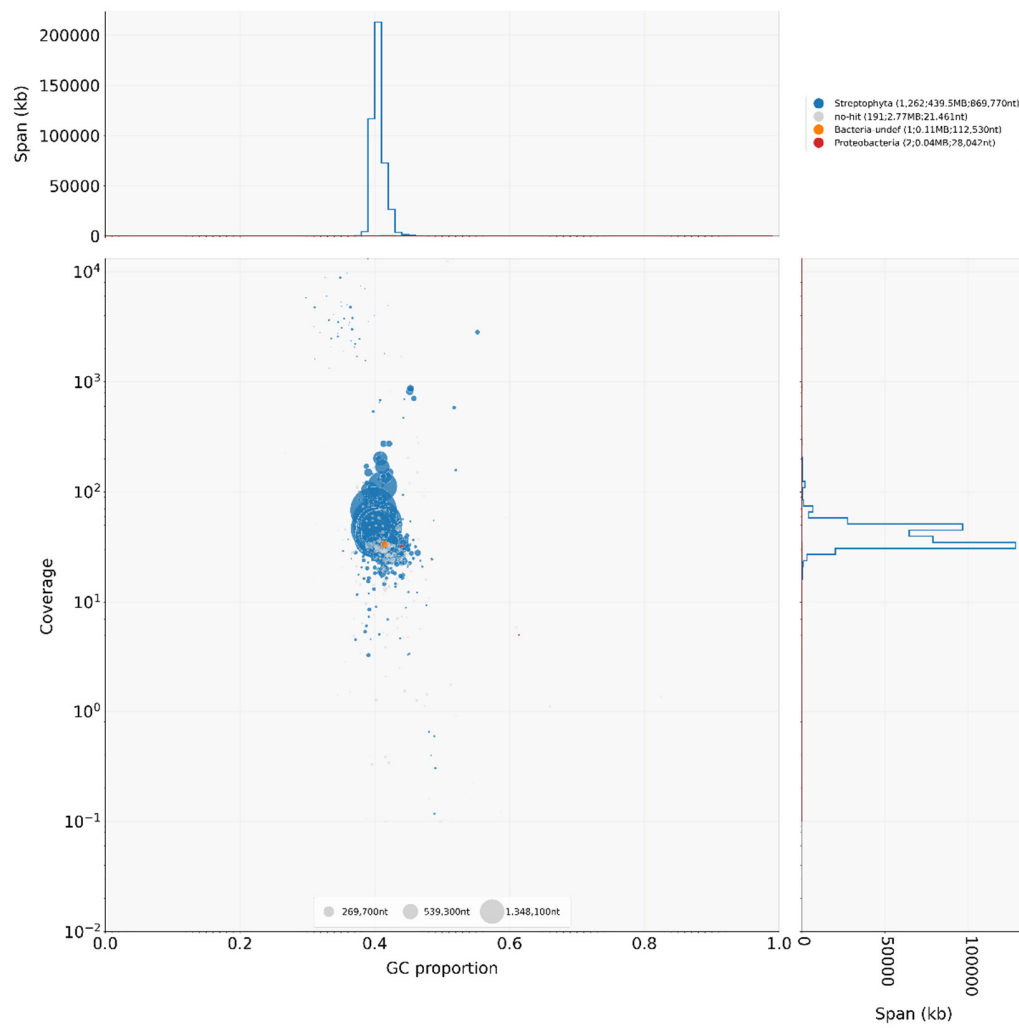

**Figure S1.** Blobplot of *Rhodomyrtus tomentosa* final assembly.

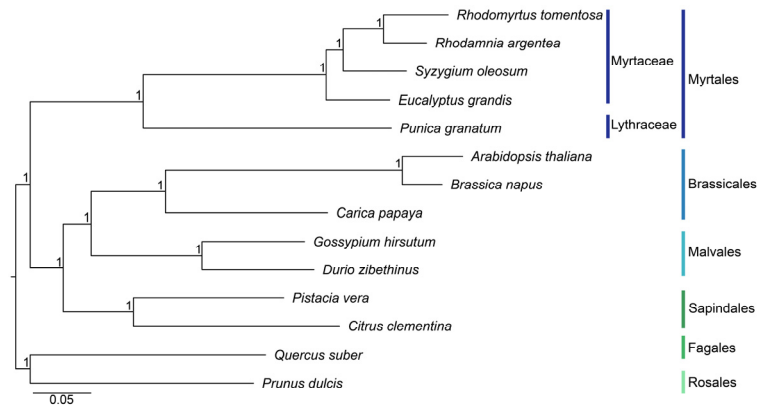

**Figure S2.** Maximum likelihood phylogenetic tree based on 236 orthologous gene groups. Local support values based on the Shimodaira-Hasegawa test are shown at each node.

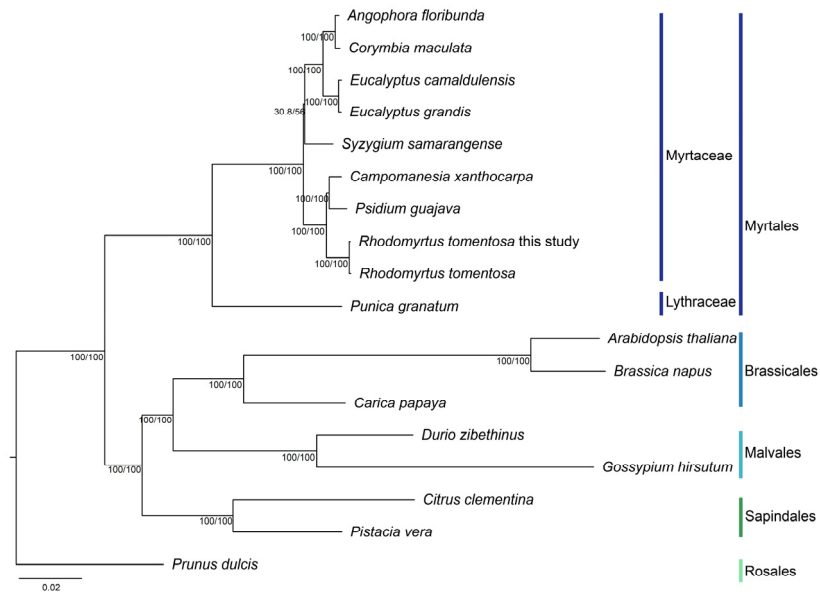

**Figure S3.** Maximum likelihood tree based on chloroplast genome. Approximate likelihood ratio test and rapid bootstrap numbers are shown at each node respectively.

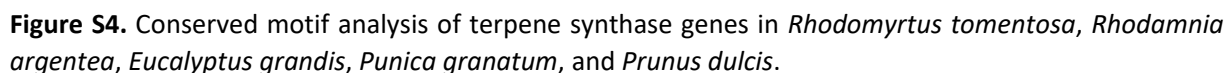

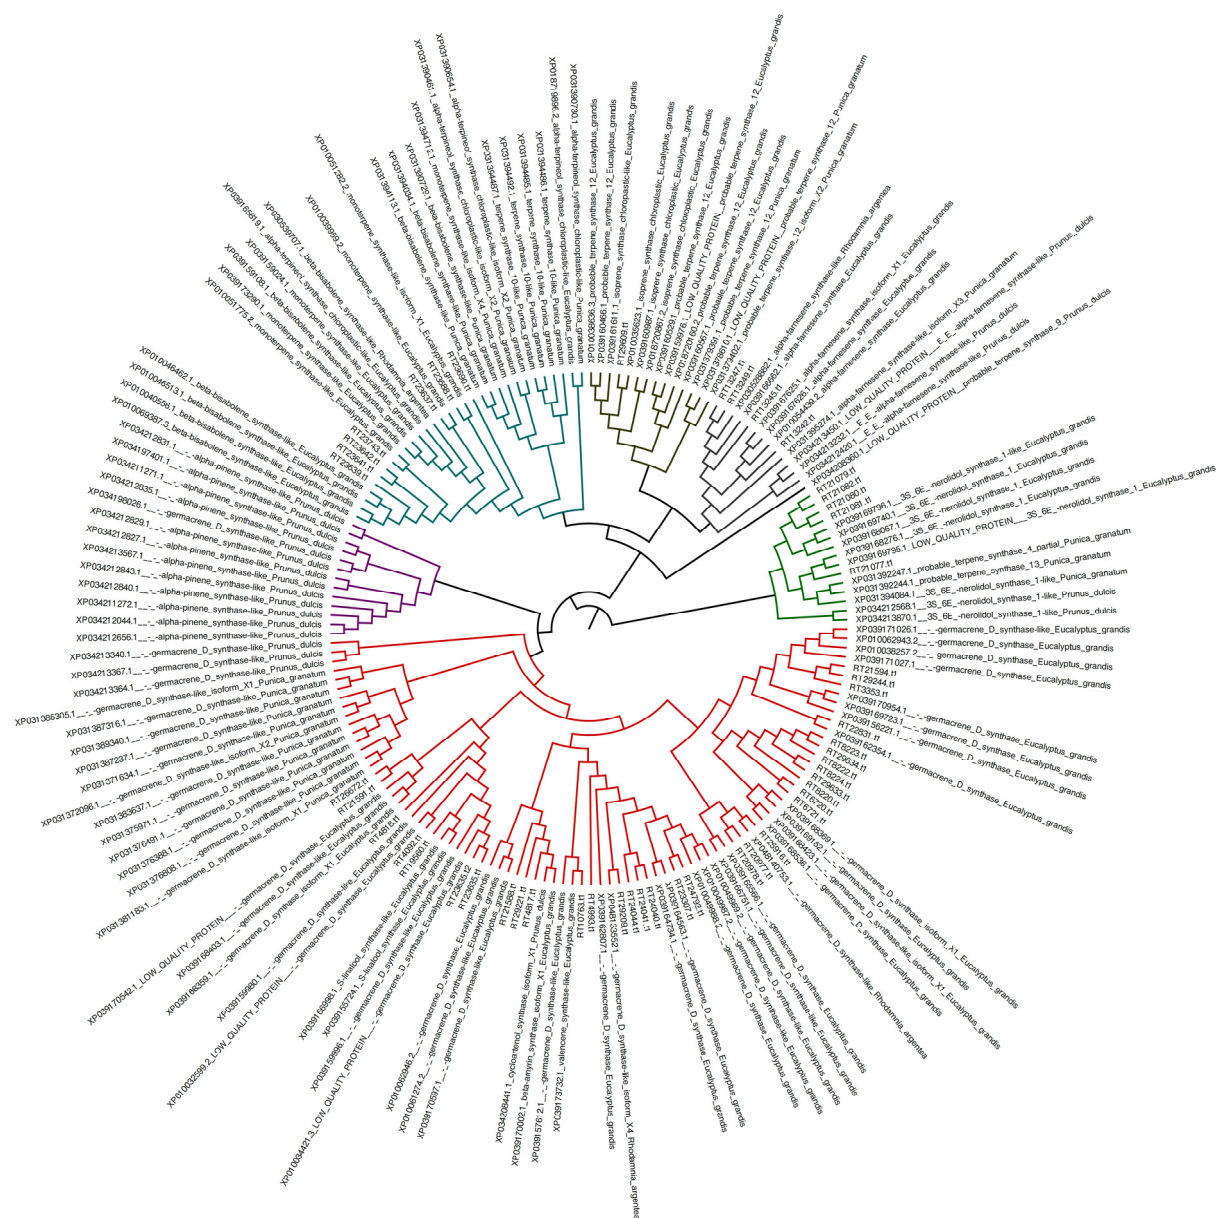

**Figure S5.** Phylogenetic tree of terpene synthase genes in *Rhodomyrtus tomentosa*, *Rhodamnia argentea*, *Eucalyptus grandis*, *Punica granatum*, and *Prunus dulcis*.

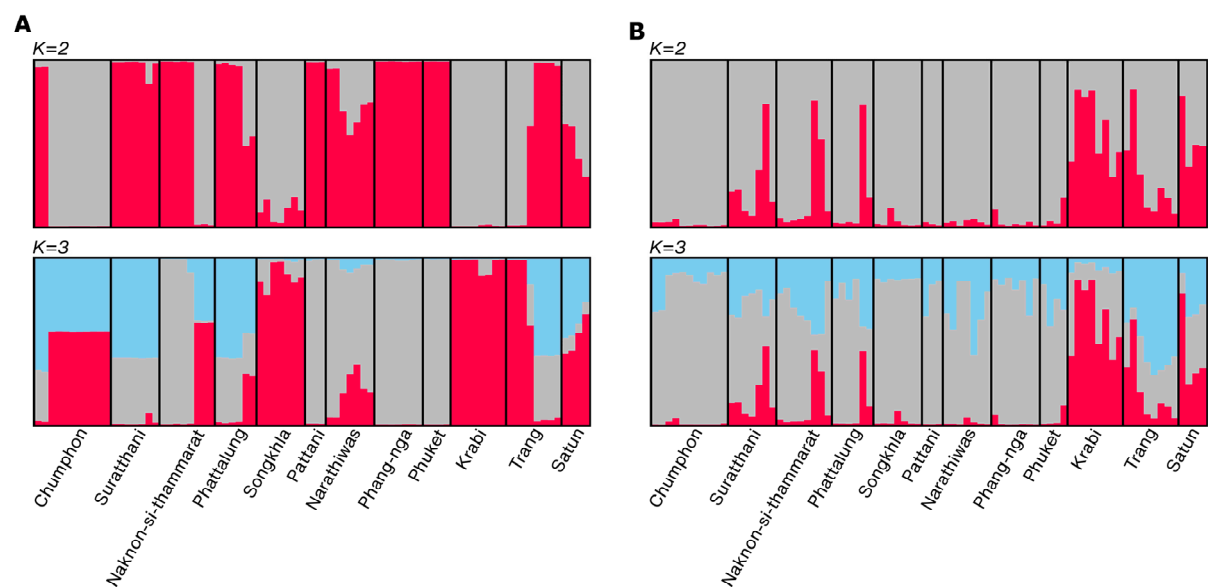

**Figure S6.** Admixture analysis bar plots of genetic structure inferred by Bayesian clustering at  $K = 2$  and 3 using ISSR (A) and SSR data (B).

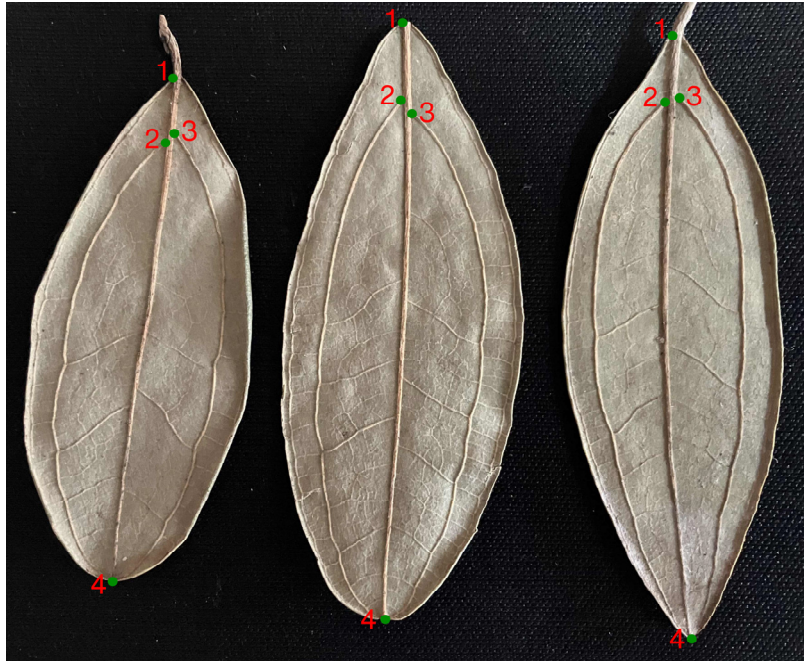

**Figure S7.** Four geometric morphometrics landmarks used to digitized *Rhodomyrtus tomentosa* leaves.
