# Supplementary material for: Complete Genome of Rose Myrtle, Rhodomyrtus tomentosa, and Its Population Genetics in Thai Peninsula
Source: Plants (Basel). 2023 Apr 7;12(8):1582. doi: 10.3390/plants12081582 (PMC10144328; doi:10.3390/plants12081582)
Supplement: Supplementary file 1 [file plants-12-01582-s001.zip › supplement_tables.xlsx]

## Sheet: Table S1
Table S1. Genome assembly statistics.
Statistics	First assembly	Polished assembly	Final assembly
n contigs	1916	1907	1431
n contigs (≥ 0 bp)	1916	1915	1447
n contigs (≥ 1000 bp)	1881	1867	1416
Largest contig	7621149	7593861	5392258
Total length	460422057	461980220	442404830
Total length (≥ 0 bp)	460422057	461983488	442410621
Total length (≥ 1000 bp)	460397316	461951781	442394985
N50	797580	779801	868979
N75	320716	321244	158488
L50	142	143	123
GC (%)	41.13	40.56	40.53

## Sheet: Table S2
Table S2. Repeats statistics of Rhodomyrtus tomentosa compared with Rhodamnia argentea genome.
	R. tomentosa			R. argentea
	number of elements	length occupied (bp)	percentage of sequence	number of elements	length occupied (bp)	percentage of sequence
Retroelements	89862	149381128	33.76	38816	60846995	17.55
SINEs:	1027	164678	0.04	1243	212590	0.06
Penelope	0	0	0	0	0	0
LINEs:	9468	7365073	1.66	5107	2653601	0.77
CRE/SLACS	0	0	0	0	0	0
L2/CR1/Rex	0	0	0	0	0	0
R1/LOA/Jockey	0	0	0	35	53270	0.02
R2/R4/NeSL	0	0	0	0	0	0
RTE/Bov-B	5672	4748854	1.07	628	259733	0.07
L1/CIN4	3796	2616219	0.59	4444	2340598	0.68
LTR elements:	79367	141851377	32.06	32466	57980804	16.72
BEL/Pao	0	0	0	0	0	0
Ty1/Copia	29022	26604834	6.01	15679	14521870	4.19
Gypsy/DIRS1	48154	112221266	25.37	15374	42287619	12.2
Retroviral	0	0	0	356	72774	0.02
DNA transposons	6830	4933417	1.12	9537	6183874	1.78
hobo-Activator	3147	2532174	0.57	4293	2911091	0.84
Tc1-IS630-Pogo	0	0	0	0	0	0
En-Spm	0	0	0	0	0	0
MuDR-IS905	0	0	0	0	0	0
PiggyBac	0	0	0	0	0	0
Tourist/Harbinger	555	360905	0.08	696	472604	0.14
Other (Mirage, P-element, Transib)	0	0	0	0	0	0
Rolling-circles	2226	1102777	0.25	4621	1720058	0.5
Unclassified:	321493	106362866	24.04	331930	90960680	26.24
Total interspersed repeats:		260677411	58.92		157991549	45.57
Small RNA:	2690	656099	0.15	2200	910151	0.26
Satellites:	204	105854	0.02	0	0	0
Simple repeats:	471	296720	0.07	569	45989	0.01
Low complexity:	0	0	0	0	0	0

## Sheet: Table S3
Table S3. Predicted genes statistics.
mRNA	with isoforms	without isoforms
Number of genes	2209	2209
Number of mRNAs	2209	2209
Number of cdss	2209	2209
Number of exons	10652	10652
Number of start codons	2209	2209
Number of stop codons	2209	2209
Number of exon in cds	10652	10652
Number of intron in cds	8443	8443
Number of intron in exon	8443	8443
Number gene overlapping	0	0
mean mRNAs per gene	1	1
mean cdss per mRNA	1	1
mean exons per mRNA	4.8	4.8
mean start_codons per mRNA	1	1
mean stop_codons per mRNA	1	1
mean exons per cds	4.8	4.8
mean introns in cdss per mRNA	3.8	3.8
mean introns in exons per mRNA	3.8	3.8
Total gene length	6219773	6219773
Total mrna length	6219773	6219773
Total cds length	2606298	2606298
Total exon length	2606298	2606298
Total start codon length	6627	6627
Total stop codon length	6627	6627
Total intron length per cds	3613475	3613475
Total intron length per exon	3613475	3613475
mean gene length	2815	2815
mean mRNA length	2815	2815
mean cds length	1179	1179
mean exon length	244	244
mean start_codon length	3	3
mean stop_codon length	3	3
mean cds piece length	244	244
mean intron in cds length	427	427
mean intron in exon length	427	427
Longest gene	20541	20541
Longest mrna	20541	20541
Longest cds	7230	7230
Longest exon	5034	5034
Longest start_codon	3	3
Longest stop_codon	3	3
Longest cds piece	5034	5034
Longest intron into cds part	9515	9515
Longest intron into exon part	9515	9515
Shortest gene	388	388
Shortest mrna	388	388
Shortest cds	300	300
Shortest exon	3	3
Shortest start codon	3	3
Shortest stop codon	3	3
Shortest cds piece	3	3
Shortest intron into cds part	59	59
Shortest intron into exon part	59	59
Transcript
Number of genes	29768	29768
Number of transcripts	31779	29768
Number of cdss	31779	29768
Number of exons	166740	148729
Number of introns	134961	118961
Number of start_codons	31696	29689
Number of stop_codons	31727	29721
Number of exon in cds	166740	148729
Number of intron in cds	134961	118961
Number of intron in exon	134961	118961
Number of intron in intron	110632	96528
Number gene overlapping	125	121
Number of single exon gene	7303	7335
Number of single exon transcript	7450	7335
mean transcripts per gene	1.1	1
mean cdss per transcript	1	1
mean exons per transcript	5.2	5
mean introns per transcript	4.2	4
mean start_codons per transcript	1	1
mean stop_codons per transcript	1	1
mean exons per cds	5.2	5
mean introns in cdss per transcript	4.2	4
mean introns in exons per transcript	4.2	4
mean introns in introns per transcript	3.5	3.2
Total gene length	93985675	93985675
Total transcript length	105206772	93876824
Total cds length	34926603	31934619
Total exon length	34926603	31934619
Total intron length	70280169	61942205
Total start_codon length	95088	89067
Total stop_codon length	95181	89163
Total intron length per cds	70280169	61942205
Total intron length per exon	70280169	61942205
Total intron length per intron	17182816	15076843
mean gene length	3157	3157
mean transcript length	3310	3153
mean cds length	1099	1072
mean exon length	209	214
mean intron length	520	520
mean start_codon length	3	3
mean stop_codon length	3	3
mean cds piece length	209	214
mean intron in cds length	520	520
mean intron in exon length	520	520
mean intron in intron length	155	156
Longest gene	101925	101925
Longest transcript	101925	101925
Longest cds	16374	16374
Longest exon	14432	14432
Longest intron	30512	30512
Longest start_codon	3	3
Longest stop_codon	3	3
Longest cds piece	14432	14432
Longest intron into cds part	30512	30512
Longest intron into exon part	30512	30512
Longest intron into intron part	8135	8135
Shortest gene	93	93
Shortest transcript	93	93
Shortest cds	25	25
Shortest exon	3	3
Shortest intron	45	45
Shortest start_codon	3	3
Shortest stop_codon	3	3
Shortest cds piece	3	3
Shortest intron into cds part	45	45
Shortest intron into exon part	45	45
Shortest intron into intron part	5	5

## Sheet: Table S4
Table S4. Gene ontology annotation of Rhodomyrtus tomentosa generated using eggNOG.
#query	seed_ortholog	evalue	score	eggNOG_OGs	max_annot_lvl	COG_category	Description	Preferred_name	GOs	EC	KEGG_ko	KEGG_Pathway	KEGG_Module	KEGG_Reaction	KEGG_rclass	BRITE	KEGG_TC	CAZy	BiGG_Reaction	PFAMs
file_1_file_1_jg28219.t1	71139.XP_010052590.1	2.31e-141	406	KOG2389@1|root,KOG2389@2759|Eukaryota,37VPG@33090|Viridiplantae,3GJXS@35493|Streptophyta	35493|Streptophyta	K	Transcription initiation factor TFIID subunit	-	-	-	ko:K14649	ko03022,map03022	-	-	-	ko00000,ko00001,ko03021	-	-	-	Bromo_TP,TAF8_C
file_1_file_1_jg28221.t1	71139.XP_010054515.1	0	1500	KOG1041@1|root,KOG1041@2759|Eukaryota,37R3G@33090|Viridiplantae,3GC0H@35493|Streptophyta	35493|Streptophyta	J	Belongs to the argonaute family	AGO2	GO:0002252,GO:0002376,GO:0003674,GO:0003676,GO:0003723,GO:0003729,GO:0005488,GO:0005575,GO:0005622,GO:0005623,GO:0005634,GO:0005737,GO:0005829,GO:0006950,GO:0006952,GO:0008150,GO:0009605,GO:0009607,GO:0009615,GO:0009617,GO:0016032,GO:0019048,GO:0035197,GO:0035821,GO:0042742,GO:0043207,GO:0043226,GO:0043227,GO:0043229,GO:0043231,GO:0044003,GO:0044403,GO:0044419,GO:0044424,GO:0044444,GO:0044464,GO:…	-	ko:K11593	-	-	-	-	ko00000,ko03019,ko03036	-	-	-	ArgoL1,ArgoL2,ArgoMid,ArgoN,PAZ,Piwi
file_1_file_1_jg656.t1	71139.XP_010045365.1	9.25e-137	397	COG5147@1|root,KOG0048@2759|Eukaryota,37Q2N@33090|Viridiplantae,3G9HF@35493|Streptophyta	35493|Streptophyta	K	Transcription factor	MYB108	GO:0000981,GO:0000988,GO:0000989,GO:0001067,GO:0001076,GO:0001101,GO:0001134,GO:0001135,GO:0003674,GO:0003676,GO:0003677,GO:0003700,GO:0005488,GO:0005575,GO:0005622,GO:0005623,GO:0005634,GO:0006355,GO:0006357,GO:0006950,GO:0006970,GO:0008150,GO:0009605,GO:0009607,GO:0009620,GO:0009628,GO:0009651,GO:0009719,GO:0009723,GO:0009725,GO:0009737,GO:0009753,GO:0009889,GO:0009987,GO:0010033,GO:0010468,GO:…	-	ko:K09422	-	-	-	-	ko00000,ko03000	-	-	-	Myb_DNA-binding
file_1_file_1_jg658.t1	71139.XP_010045364.1	0	1285	2CN07@1|root,2QT23@2759|Eukaryota,37IHS@33090|Viridiplantae,3G7R0@35493|Streptophyta	35493|Streptophyta	S	Neutral invertase	NIN1	GO:0003674,GO:0003824,GO:0004553,GO:0004564,GO:0004575,GO:0005575,GO:0005622,GO:0005623,GO:0005737,GO:0005739,GO:0005975,GO:0005984,GO:0005985,GO:0005987,GO:0007623,GO:0008150,GO:0008152,GO:0009056,GO:0009311,GO:0009313,GO:0009987,GO:0010029,GO:0015926,GO:0016052,GO:0016787,GO:0016798,GO:0040034,GO:0043226,GO:0043227,GO:0043229,GO:0043231,GO:0044237,GO:0044238,GO:0044248,GO:0044262,GO:0044275,GO:…	-	-	-	-	-	-	-	-	-	-	Glyco_hydro_100
file_1_file_1_jg659.t1	71139.XP_010045363.1	6.89e-107	317	COG3491@1|root,KOG0143@2759|Eukaryota,37R49@33090|Viridiplantae,3G77N@35493|Streptophyta	35493|Streptophyta	Q	Belongs to the iron ascorbate-dependent oxidoreductase family	-	GO:0003674,GO:0003824,GO:0005575,GO:0006082,GO:0006629,GO:0006720,GO:0006721,GO:0008150,GO:0008152,GO:0008300,GO:0009056,GO:0009314,GO:0009416,GO:0009628,GO:0009685,GO:0009987,GO:0010817,GO:0016020,GO:0016042,GO:0016054,GO:0016101,GO:0016103,GO:0016115,GO:0016491,GO:0016705,GO:0016706,GO:0019752,GO:0042445,GO:0042447,GO:0043436,GO:0044237,GO:0044238,GO:0044242,GO:0044248,GO:0044255,GO:0044281,GO:…	1.14.11.13	ko:K04125	ko00904,ko01110,map00904,map01110	-	R03008,R03809,R06337,R06338	RC00478,RC00661	ko00000,ko00001,ko01000	-	-	-	2OG-FeII_Oxy,DIOX_N
file_1_file_1_jg660.t1	71139.XP_010045363.1	1.73e-72	226	COG3491@1|root,KOG0143@2759|Eukaryota,37R49@33090|Viridiplantae,3G77N@35493|Streptophyta	35493|Streptophyta	Q	Belongs to the iron ascorbate-dependent oxidoreductase family	-	GO:0003674,GO:0003824,GO:0005575,GO:0006082,GO:0006629,GO:0006720,GO:0006721,GO:0008150,GO:0008152,GO:0008300,GO:0009056,GO:0009314,GO:0009416,GO:0009628,GO:0009685,GO:0009987,GO:0010817,GO:0016020,GO:0016042,GO:0016054,GO:0016101,GO:0016103,GO:0016115,GO:0016491,GO:0016705,GO:0016706,GO:0019752,GO:0042445,GO:0042447,GO:0043436,GO:0044237,GO:0044238,GO:0044242,GO:0044248,GO:0044255,GO:0044281,GO:…	1.14.11.13	ko:K04125	ko00904,ko01110,map00904,map01110	-	R03008,R03809,R06337,R06338	RC00478,RC00661	ko00000,ko00001,ko01000	-	-	-	2OG-FeII_Oxy,DIOX_N
file_1_file_1_jg661.t1	71139.XP_010045362.1	3.04e-239	662	2CNGF@1|root,2QW52@2759|Eukaryota,37MEG@33090|Viridiplantae,3GFI4@35493|Streptophyta	35493|Streptophyta	S	F-box protein	-	-	-	-	-	-	-	-	-	-	-	-	F-box,F-box-like,FBA_3
file_1_file_1_jg662.t1	71139.XP_010045358.1	0	1178	KOG0720@1|root,KOG0720@2759|Eukaryota,37IHF@33090|Viridiplantae,3GBMU@35493|Streptophyta	35493|Streptophyta	O	Cleavage inducing molecular chaperone	-	-	-	ko:K09534	-	-	-	-	ko00000,ko03110	-	-	-	DnaJ,Jiv90
file_1_file_1_jg663.t1	71139.XP_010045357.1	4.21e-155	444	COG0360@1|root,2QU7T@2759|Eukaryota,37KPU@33090|Viridiplantae,3GCDX@35493|Streptophyta	35493|Streptophyta	J	ribosomal protein S6	-	-	-	-	-	-	-	-	-	-	-	-	Ribosomal_S6
file_1_file_1_jg665.t1	71139.XP_010046746.1	7.86e-135	427	KOG4197@1|root,KOG4197@2759|Eukaryota,37KAQ@33090|Viridiplantae,3GFFT@35493|Streptophyta	35493|Streptophyta	S	Pentatricopeptide repeat-containing protein	-	GO:0003674,GO:0003676,GO:0003723,GO:0003824,GO:0004518,GO:0004519,GO:0005488,GO:0005575,GO:0005622,GO:0005623,GO:0006139,GO:0006725,GO:0006807,GO:0008150,GO:0008152,GO:0009451,GO:0009987,GO:0016070,GO:0016787,GO:0016788,GO:0034641,GO:0043170,GO:0043226,GO:0043227,GO:0043229,GO:0043231,GO:0043412,GO:0044237,GO:0044238,GO:0044424,GO:0044464,GO:0046483,GO:0071704,GO:0090304,GO:0090305,GO:0097159,GO:…	-	-	-	-	-	-	-	-	-	-	PPR,PPR_1,PPR_2,PPR_3,PPR_long
file_1_file_1_jg667.t1	71139.XP_010046746.1	9.89e-227	661	KOG4197@1|root,KOG4197@2759|Eukaryota,37KAQ@33090|Viridiplantae,3GFFT@35493|Streptophyta	35493|Streptophyta	S	Pentatricopeptide repeat-containing protein	-	GO:0003674,GO:0003676,GO:0003723,GO:0003824,GO:0004518,GO:0004519,GO:0005488,GO:0005575,GO:0005622,GO:0005623,GO:0006139,GO:0006725,GO:0006807,GO:0008150,GO:0008152,GO:0009451,GO:0009987,GO:0016070,GO:0016787,GO:0016788,GO:0034641,GO:0043170,GO:0043226,GO:0043227,GO:0043229,GO:0043231,GO:0043412,GO:0044237,GO:0044238,GO:0044424,GO:0044464,GO:0046483,GO:0071704,GO:0090304,GO:0090305,GO:0097159,GO:…	-	-	-	-	-	-	-	-	-	-	PPR,PPR_1,PPR_2,PPR_3,PPR_long
file_1_file_1_jg668.t1	71139.XP_010045355.1	0	1037	KOG1699@1|root,KOG1699@2759|Eukaryota,37ISC@33090|Viridiplantae,3GDJI@35493|Streptophyta	35493|Streptophyta	O	CAS1 domain-containing protein	-	GO:0000271,GO:0001101,GO:0005575,GO:0005622,GO:0005623,GO:0005737,GO:0005783,GO:0005794,GO:0005975,GO:0005976,GO:0006073,GO:0006950,GO:0006952,GO:0008150,GO:0008152,GO:0009058,GO:0009059,GO:0009605,GO:0009607,GO:0009620,GO:0009719,GO:0009725,GO:0009737,GO:0009832,GO:0009834,GO:0009987,GO:0010033,GO:0010383,GO:0010410,GO:0010411,GO:0012505,GO:0016051,GO:0033692,GO:0033993,GO:0034637,GO:0034645,GO:…	2.3.1.45	ko:K03377	-	-	-	-	ko00000,ko01000	-	-	-	Cas1_AcylT
file_1_file_1_jg668.t2	71139.XP_010045355.1	0	1030	KOG1699@1|root,KOG1699@2759|Eukaryota,37ISC@33090|Viridiplantae,3GDJI@35493|Streptophyta	35493|Streptophyta	O	CAS1 domain-containing protein	-	GO:0000271,GO:0001101,GO:0005575,GO:0005622,GO:0005623,GO:0005737,GO:0005783,GO:0005794,GO:0005975,GO:0005976,GO:0006073,GO:0006950,GO:0006952,GO:0008150,GO:0008152,GO:0009058,GO:0009059,GO:0009605,GO:0009607,GO:0009620,GO:0009719,GO:0009725,GO:0009737,GO:0009832,GO:0009834,GO:0009987,GO:0010033,GO:0010383,GO:0010410,GO:0010411,GO:0012505,GO:0016051,GO:0033692,GO:0033993,GO:0034637,GO:0034645,GO:…	2.3.1.45	ko:K03377	-	-	-	-	ko00000,ko01000	-	-	-	Cas1_AcylT
file_1_file_1_jg670.t1	71139.XP_010045352.1	2.91e-170	498	COG5064@1|root,KOG0166@2759|Eukaryota,37PSC@33090|Viridiplantae,3GA6S@35493|Streptophyta	35493|Streptophyta	U	Belongs to the importin alpha family	-	-	-	-	-	-	-	-	-	-	-	-	Arm,Arm_3,IBB
file_1_file_1_jg671.t1	71139.XP_010046743.1	2.01e-11	70.1	2ABVI@1|root,2RYQ2@2759|Eukaryota,37UBA@33090|Viridiplantae,3GIFE@35493|Streptophyta	35493|Streptophyta	-	-	-	-	-	-	-	-	-	-	-	-	-	-	-
file_1_file_1_jg673.t1	71139.XP_010045344.1	2.03e-12	65.9	2C6MN@1|root,2S30H@2759|Eukaryota,37VB6@33090|Viridiplantae,3GJ5S@35493|Streptophyta	35493|Streptophyta	S	cell wall vacuolar inhibitor of fructosidase	-	GO:0005575,GO:0005576	-	-	-	-	-	-	-	-	-	-	PMEI
file_1_file_1_jg674.t1	71139.XP_010045343.1	4.46e-80	243	2C6MN@1|root,2S30H@2759|Eukaryota,37VB6@33090|Viridiplantae,3GJ5S@35493|Streptophyta	71139.XP_010045343.1|-	S	cell wall vacuolar inhibitor of fructosidase	-	-	-	-	-	-	-	-	-	-	-	-	-
file_1_file_1_jg675.t1	71139.XP_010045343.1	9.89e-83	249	2C6MN@1|root,2S30H@2759|Eukaryota,37VB6@33090|Viridiplantae,3GJ5S@35493|Streptophyta	71139.XP_010045343.1|-	S	cell wall vacuolar inhibitor of fructosidase	-	-	-	-	-	-	-	-	-	-	-	-	-
file_1_file_1_jg676.t1	3750.XP_008390468.1	8.67e-170	520	COG1132@1|root,KOG0055@2759|Eukaryota,37HZ5@33090|Viridiplantae,3G9FQ@35493|Streptophyta	35493|Streptophyta	Q	ABC transporter B family member	-	GO:0003674,GO:0005215,GO:0005575,GO:0005623,GO:0005886,GO:0005911,GO:0006810,GO:0008150,GO:0009506,GO:0009914,GO:0009926,GO:0009966,GO:0010315,GO:0010329,GO:0010540,GO:0010646,GO:0010817,GO:0010928,GO:0015562,GO:0016020,GO:0022857,GO:0023051,GO:0030054,GO:0044464,GO:0048583,GO:0050789,GO:0050794,GO:0051179,GO:0051234,GO:0055044,GO:0055085,GO:0060918,GO:0065007,GO:0065008,GO:0071944,GO:0080161	3.6.3.44	ko:K05658	ko02010,ko04976,ko05206,ko05226,map02010,map04976,map05206,map05226	-	-	-	ko00000,ko00001,ko01000,ko02000,ko04090,ko04147	3.A.1.201	-	-	ABC_membrane,ABC_tran
file_1_file_1_jg677.t1	71139.XP_010045339.1	0	1301	KOG4197@1|root,KOG4197@2759|Eukaryota,37QVC@33090|Viridiplantae,3GFZA@35493|Streptophyta	35493|Streptophyta	S	Pentatricopeptide repeat-containing protein	-	GO:0003674,GO:0003676,GO:0003723,GO:0003824,GO:0004518,GO:0004519,GO:0005488,GO:0005575,GO:0005622,GO:0005623,GO:0006139,GO:0006725,GO:0006807,GO:0008150,GO:0008152,GO:0009451,GO:0009987,GO:0016070,GO:0016787,GO:0016788,GO:0034641,GO:0043170,GO:0043226,GO:0043227,GO:0043229,GO:0043231,GO:0043412,GO:0044237,GO:0044238,GO:0044424,GO:0044464,GO:0046483,GO:0071704,GO:0090304,GO:0090305,GO:0097159,GO:…	-	-	-	-	-	-	-	-	-	-	DUF1068,PPR,PPR_2
file_1_file_2_10876_t	71139.XP_010045341.1	1.61e-70	222	2CMA8@1|root,2QPSC@2759|Eukaryota,37UB5@33090|Viridiplantae,3G8SA@35493|Streptophyta	35493|Streptophyta	L	Protein OSB2, chloroplastic-like	-	GO:0000229,GO:0005575,GO:0005622,GO:0005623,GO:0005694,GO:0005737,GO:0009295,GO:0009508,GO:0009532,GO:0009536,GO:0042646,GO:0043226,GO:0043227,GO:0043228,GO:0043229,GO:0043231,GO:0043232,GO:0044422,GO:0044424,GO:0044435,GO:0044444,GO:0044446,GO:0044464	-	-	-	-	-	-	-	-	-	-	SSB
file_1_file_1_jg679.t1	29760.VIT_07s0005g02660.t01	1.73e-191	590	COG1132@1|root,KOG0055@2759|Eukaryota,37HZ5@33090|Viridiplantae,3G9FQ@35493|Streptophyta	35493|Streptophyta	Q	ABC transporter B family member	-	GO:0003674,GO:0003824,GO:0005215,GO:0005575,GO:0005622,GO:0005623,GO:0005737,GO:0005773,GO:0005774,GO:0005886,GO:0005911,GO:0006810,GO:0006855,GO:0007275,GO:0008150,GO:0008559,GO:0009506,GO:0009605,GO:0009606,GO:0009628,GO:0009629,GO:0009630,GO:0009653,GO:0009719,GO:0009725,GO:0009733,GO:0009735,GO:0009888,GO:0009914,GO:0009926,GO:0009966,GO:0009987,GO:0010015,GO:0010033,GO:0010053,GO:0010054,GO:…	3.6.3.44	ko:K05658	ko02010,ko04976,ko05206,ko05226,map02010,map04976,map05206,map05226	-	-	-	ko00000,ko00001,ko01000,ko02000,ko04090,ko04147	3.A.1.201	-	-	ABC_membrane,ABC_tran
file_1_file_1_jg20250.t1	71139.XP_010051796.1	1.71e-89	266	2AKZV@1|root,2RZAR@2759|Eukaryota,37UQB@33090|Viridiplantae,3GII1@35493|Streptophyta	35493|Streptophyta	S	Plasma membrane-associated cation-binding protein	-	GO:0000226,GO:0001101,GO:0001558,GO:0002237,GO:0003674,GO:0005488,GO:0005507,GO:0005509,GO:0005515,GO:0005516,GO:0005543,GO:0005546,GO:0005547,GO:0005575,GO:0005622,GO:0005623,GO:0005737,GO:0005773,GO:0005856,GO:0005874,GO:0005881,GO:0005886,GO:0005911,GO:0006464,GO:0006497,GO:0006498,GO:0006499,GO:0006807,GO:0006810,GO:0006950,GO:0006952,GO:0006970,GO:0006996,GO:0007010,GO:0007017,GO:0007154,GO:…	-	-	-	-	-	-	-	-	-	-	DREPP
file_1_file_1_jg20251.t1	71139.XP_010051799.1	0	1514	COG1241@1|root,KOG0480@2759|Eukaryota,37SEV@33090|Viridiplantae,3GGZJ@35493|Streptophyta	35493|Streptophyta	L	Belongs to the MCM family	MCM6	GO:0000347,GO:0005575,GO:0005622,GO:0005623,GO:0005634,GO:0006139,GO:0006259,GO:0006260,GO:0006261,GO:0006268,GO:0006725,GO:0006807,GO:0006996,GO:0008150,GO:0008152,GO:0009058,GO:0009059,GO:0009987,GO:0016043,GO:0032392,GO:0032508,GO:0032991,GO:0034641,GO:0034645,GO:0043170,GO:0043226,GO:0043227,GO:0043229,GO:0043231,GO:0044237,GO:0044238,GO:0044249,GO:0044260,GO:0044422,GO:0044424,GO:0044428,GO:…	3.6.4.12	ko:K02542	ko03030,ko04110,ko04111,ko04113,map03030,map04110,map04111,map04113	M00285	-	-	ko00000,ko00001,ko00002,ko01000,ko03032	-	-	-	MCM,MCM_N,MCM_OB
file_1_file_1_jg20252.t1	71139.XP_010051801.1	7.55e-298	879	COG4886@1|root,2QWQJ@2759|Eukaryota,37KGK@33090|Viridiplantae,3GFIG@35493|Streptophyta	35493|Streptophyta	T	Belongs to the protein kinase superfamily. Ser Thr protein kinase family	-	-	-	-	-	-	-	-	-	-	-	-	LRRNT_2,LRR_1,LRR_8,Pkinase
file_1_file_1_jg20254.t1	71139.XP_010051802.1	7.77e-195	544	COG2227@1|root,KOG1270@2759|Eukaryota,37M29@33090|Viridiplantae,3GENC@35493|Streptophyta	35493|Streptophyta	H	O-methyltransferase that catalyzes the 2 O-methylation steps in the ubiquinone biosynthetic pathway	COQ3	GO:0003674,GO:0003824,GO:0004395,GO:0005575,GO:0005622,GO:0005623,GO:0005737,GO:0005739,GO:0005740,GO:0006732,GO:0006733,GO:0006743,GO:0006744,GO:0008150,GO:0008152,GO:0008168,GO:0008757,GO:0009058,GO:0009108,GO:0009987,GO:0010420,GO:0016740,GO:0016741,GO:0031967,GO:0031975,GO:0032259,GO:0042180,GO:0042181,GO:0043226,GO:0043227,GO:0043229,GO:0043231,GO:0044237,GO:0044249,GO:0044281,GO:0044283,GO:…	2.1.1.114,2.1.1.64	ko:K00591	ko00130,ko01100,ko01110,map00130,map01100,map01110	M00128	R02175,R04711,R07235,R08771,R08781	RC00003,RC00392,RC01895	ko00000,ko00001,ko00002,ko01000	-	-	-	Methyltransf_11,Methyltransf_23
file_1_file_1_jg20255.t1	71139.XP_010051803.1	0	1580	KOG4197@1|root,KOG4197@2759|Eukaryota,37N68@33090|Viridiplantae,3GE9B@35493|Streptophyta	35493|Streptophyta	S	Pentatricopeptide repeat-containing protein	-	GO:0003674,GO:0003676,GO:0003723,GO:0003824,GO:0004518,GO:0004519,GO:0005488,GO:0005575,GO:0005622,GO:0005623,GO:0005737,GO:0006139,GO:0006396,GO:0006725,GO:0006807,GO:0008150,GO:0008152,GO:0009451,GO:0009507,GO:0009536,GO:0009987,GO:0010467,GO:0016070,GO:0016787,GO:0016788,GO:0031425,GO:0034641,GO:0043170,GO:0043226,GO:0043227,GO:0043229,GO:0043231,GO:0043412,GO:0044237,GO:0044238,GO:0044424,GO:…	-	-	-	-	-	-	-	-	-	-	DYW_deaminase,PPR,PPR_2
file_1_file_1_jg20256.t2	71139.XP_010051805.1	0	848	KOG2695@1|root,KOG2695@2759|Eukaryota,37RTQ@33090|Viridiplantae,3GBN8@35493|Streptophyta	35493|Streptophyta	S	DDB1- and CUL4-associated factor	-	GO:0000151,GO:0003674,GO:0003676,GO:0003723,GO:0005488,GO:0005575,GO:0005622,GO:0005623,GO:0005634,GO:0005654,GO:0005681,GO:0005682,GO:0006139,GO:0006396,GO:0006464,GO:0006725,GO:0006807,GO:0008150,GO:0008152,GO:0008380,GO:0009987,GO:0010467,GO:0016070,GO:0019538,GO:0030532,GO:0031461,GO:0031974,GO:0031981,GO:0032991,GO:0034641,GO:0036211,GO:0043170,GO:0043226,GO:0043227,GO:0043229,GO:0043231,GO:…	-	ko:K11799	-	-	-	-	ko00000,ko04121	-	-	-	WD40
file_1_file_1_jg20256.t1	71139.XP_010051805.1	2.42e-63	208	KOG2695@1|root,KOG2695@2759|Eukaryota,37RTQ@33090|Viridiplantae,3GBN8@35493|Streptophyta	35493|Streptophyta	S	DDB1- and CUL4-associated factor	-	GO:0000151,GO:0003674,GO:0003676,GO:0003723,GO:0005488,GO:0005575,GO:0005622,GO:0005623,GO:0005634,GO:0005654,GO:0005681,GO:0005682,GO:0006139,GO:0006396,GO:0006464,GO:0006725,GO:0006807,GO:0008150,GO:0008152,GO:0008380,GO:0009987,GO:0010467,GO:0016070,GO:0019538,GO:0030532,GO:0031461,GO:0031974,GO:0031981,GO:0032991,GO:0034641,GO:0036211,GO:0043170,GO:0043226,GO:0043227,GO:0043229,GO:0043231,GO:…	-	ko:K11799	-	-	-	-	ko00000,ko04121	-	-	-	WD40
file_1_file_1_jg20257.t1	71139.XP_010051807.1	0	907	28NGH@1|root,2QV24@2759|Eukaryota,37J8G@33090|Viridiplantae,3G9HB@35493|Streptophyta	35493|Streptophyta	S	Ribulose-1,5 bisphosphate carboxylase oxygenase large subunit N-methyltransferase	-	GO:0005575,GO:0005622,GO:0005623,GO:0005737,GO:0009507,GO:0009536,GO:0043226,GO:0043227,GO:0043229,GO:0043231,GO:0044424,GO:0044444,GO:0044464	-	-	-	-	-	-	-	-	-	-	Rubis-subs-bind,SET
file_1_file_1_jg20258.t1	71139.XP_010051809.1	8.07e-315	873	COG0531@1|root,KOG1286@2759|Eukaryota,37JG6@33090|Viridiplantae,3G8AX@35493|Streptophyta	35493|Streptophyta	E	cationic amino acid transporter	-	GO:0005575,GO:0005623,GO:0005886,GO:0016020,GO:0044464,GO:0071944	-	ko:K03294,ko:K13865,ko:K13866	-	-	-	-	ko00000,ko02000	2.A.3.2,2.A.3.3,2.A.3.3.5	-	-	AA_permease_2,AA_permease_C
file_1_file_1_jg20260.t1	71139.XP_010051810.1	7.45e-182	506	COG1011@1|root,KOG3085@2759|Eukaryota,37NV1@33090|Viridiplantae,3GFD3@35493|Streptophyta	35493|Streptophyta	S	Haloacid dehalogenase-like hydrolase domain-containing protein	-	-	-	-	-	-	-	-	-	-	-	-	Hydrolase
file_1_file_1_jg20261.t1	71139.XP_010051816.1	0	1144	COG0389@1|root,KOG2095@2759|Eukaryota,37KFG@33090|Viridiplantae,3GD5R@35493|Streptophyta	35493|Streptophyta	L	DNA polymerase	-	GO:0000731,GO:0003674,GO:0003676,GO:0003677,GO:0003684,GO:0003824,GO:0003887,GO:0005488,GO:0005575,GO:0005622,GO:0005623,GO:0005634,GO:0005654,GO:0005737,GO:0005829,GO:0006139,GO:0006259,GO:0006281,GO:0006282,GO:0006301,GO:0006725,GO:0006807,GO:0006950,GO:0006974,GO:0008150,GO:0008152,GO:0009058,GO:0009059,GO:0009314,GO:0009411,GO:0009416,GO:0009628,GO:0009650,GO:0009987,GO:0010224,GO:0010225,GO:…	2.7.7.7	ko:K03509	ko01524,ko03460,map01524,map03460	-	-	-	ko00000,ko00001,ko01000,ko03400	-	-	-	IMS,IMS_C
file_1_file_1_jg20262.t1	71139.XP_010051818.1	1.89e-234	654	COG1159@1|root,KOG1423@2759|Eukaryota,37MZM@33090|Viridiplantae,3G7DZ@35493|Streptophyta	35493|Streptophyta	DT	Belongs to the TRAFAC class TrmE-Era-EngA-EngB-Septin- like GTPase superfamily. Era GTPase family	-	-	-	ko:K03595	-	-	-	-	ko00000,ko03009,ko03029	-	-	-	KH_2,MMR_HSR1
file_1_file_1_jg20263.t1	71139.XP_010051819.1	5.48e-70	242	KOG4197@1|root,KOG4197@2759|Eukaryota,37IT8@33090|Viridiplantae,3G7SS@35493|Streptophyta	35493|Streptophyta	S	Pentatricopeptide repeat-containing protein	-	GO:0000003,GO:0003006,GO:0003674,GO:0003676,GO:0003723,GO:0003824,GO:0004518,GO:0004519,GO:0005488,GO:0005575,GO:0005622,GO:0005623,GO:0005737,GO:0005739,GO:0006139,GO:0006412,GO:0006518,GO:0006725,GO:0006807,GO:0007275,GO:0008150,GO:0008152,GO:0009058,GO:0009059,GO:0009451,GO:0009790,GO:0009791,GO:0009793,GO:0009987,GO:0010154,GO:0010467,GO:0016070,GO:0016787,GO:0016788,GO:0019538,GO:0022414,GO:…	-	-	-	-	-	-	-	-	-	-	PPR,PPR_1,PPR_2,PPR_3
file_1_file_1_jg20265.t1	71139.XP_010051825.1	8.74e-202	566	KOG1558@1|root,KOG1558@2759|Eukaryota,37I5M@33090|Viridiplantae,3GG6E@35493|Streptophyta	35493|Streptophyta	P	zinc transporter	-	GO:0000041,GO:0003674,GO:0005215,GO:0005385,GO:0005575,GO:0005623,GO:0005886,GO:0006810,GO:0006811,GO:0006812,GO:0006829,GO:0008150,GO:0008324,GO:0015075,GO:0015318,GO:0016020,GO:0022857,GO:0022890,GO:0030001,GO:0034220,GO:0044464,GO:0046873,GO:0046915,GO:0051179,GO:0051234,GO:0055085,GO:0070838,GO:0071577,GO:0071944,GO:0072509,GO:0072511,GO:0098655,GO:0098660,GO:0098662	-	ko:K14709	-	-	-	-	ko00000,ko02000	2.A.5.1,2.A.5.3,2.A.5.6	-	-	Zip
file_1_file_1_jg20266.t1	71139.XP_010051826.1	0	868	COG0624@1|root,2QSJ5@2759|Eukaryota,37IBW@33090|Viridiplantae,3GBRA@35493|Streptophyta	35493|Streptophyta	E	Allantoate	AAH	GO:0000255,GO:0000256,GO:0003674,GO:0003824,GO:0005575,GO:0005622,GO:0005623,GO:0005737,GO:0005783,GO:0006139,GO:0006144,GO:0006145,GO:0006725,GO:0006807,GO:0008150,GO:0008152,GO:0009056,GO:0009112,GO:0009987,GO:0010135,GO:0010136,GO:0012505,GO:0016787,GO:0016810,GO:0016813,GO:0017144,GO:0019439,GO:0034641,GO:0042737,GO:0043226,GO:0043227,GO:0043229,GO:0043231,GO:0043603,GO:0043605,GO:0044237,GO:…	3.5.3.9	ko:K02083	ko00230,ko01120,map00230,map01120	-	R02423	RC00064	ko00000,ko00001,ko01000,ko01002	-	-	-	M20_dimer,Peptidase_M20,Peptidase_M28
file_1_file_1_jg20268.t1	71139.XP_010051829.1	9.95e-135	396	2CMMA@1|root,2QQTR@2759|Eukaryota,37IKU@33090|Viridiplantae,3GGIA@35493|Streptophyta	35493|Streptophyta	S	Polygalacturonase	-	-	-	-	-	-	-	-	-	-	-	-	Beta_helix
file_1_file_1_jg20269.t1	71139.XP_010051829.1	5.8e-116	346	2CMMA@1|root,2QQTR@2759|Eukaryota,37IKU@33090|Viridiplantae,3GGIA@35493|Streptophyta	35493|Streptophyta	S	Polygalacturonase	-	-	-	-	-	-	-	-	-	-	-	-	Beta_helix
file_1_file_1_jg20270.t1	71139.XP_010051831.1	2.87e-190	531	COG0615@1|root,KOG2804@2759|Eukaryota,37J9X@33090|Viridiplantae,3GF2Z@35493|Streptophyta	35493|Streptophyta	I	Cholinephosphate cytidylyltransferase	-	-	2.7.7.15	ko:K00968	ko00440,ko00564,ko01100,ko05231,map00440,map00564,map01100,map05231	M00090	R01890,R02590	RC00002	ko00000,ko00001,ko00002,ko01000	-	-	-	CTP_transf_like
file_1_file_1_jg20272.t1	71139.XP_010067826.1	8e-209	592	KOG0271@1|root,KOG0271@2759|Eukaryota,37PY7@33090|Viridiplantae,3G848@35493|Streptophyta	35493|Streptophyta	S	Notchless protein homolog	-	GO:0000027,GO:0000151,GO:0005575,GO:0005622,GO:0005623,GO:0005634,GO:0005730,GO:0005737,GO:0005840,GO:0006996,GO:0007275,GO:0008150,GO:0009553,GO:0009987,GO:0016043,GO:0022607,GO:0022613,GO:0022618,GO:0031461,GO:0031974,GO:0031981,GO:0032501,GO:0032502,GO:0032991,GO:0034622,GO:0042254,GO:0042255,GO:0042273,GO:0043226,GO:0043227,GO:0043228,GO:0043229,GO:0043231,GO:0043232,GO:0043233,GO:0043933,GO:…	-	ko:K14855	-	-	-	-	ko00000,ko03009	-	-	-	NLE,WD40
file_1_file_1_jg20273.t1	71139.XP_010051831.1	5.35e-190	531	COG0615@1|root,KOG2804@2759|Eukaryota,37J9X@33090|Viridiplantae,3GF2Z@35493|Streptophyta	35493|Streptophyta	I	Cholinephosphate cytidylyltransferase	-	-	2.7.7.15	ko:K00968	ko00440,ko00564,ko01100,ko05231,map00440,map00564,map01100,map05231	M00090	R01890,R02590	RC00002	ko00000,ko00001,ko00002,ko01000	-	-	-	CTP_transf_like
file_1_file_1_jg20274.t1	71139.XP_010051829.1	7.09e-296	815	2CMMA@1|root,2QQTR@2759|Eukaryota,37IKU@33090|Viridiplantae,3GGIA@35493|Streptophyta	35493|Streptophyta	S	Polygalacturonase	-	-	-	-	-	-	-	-	-	-	-	-	Beta_helix
file_1_file_1_jg20275.t1	71139.XP_010051832.1	2.97e-43	147	KOG0118@1|root,KOG0118@2759|Eukaryota,37VEF@33090|Viridiplantae,3GJE0@35493|Streptophyta	35493|Streptophyta	A	RNA-binding protein	-	-	-	-	-	-	-	-	-	-	-	-	RRM_1
file_1_file_1_jg20276.t1	71139.XP_010051839.1	1.93e-87	263	2CNAD@1|root,2S40B@2759|Eukaryota,37WM4@33090|Viridiplantae,3GK5P@35493|Streptophyta	35493|Streptophyta	S	VQ motif-containing protein	-	-	-	-	-	-	-	-	-	-	-	-	VQ
file_1_file_1_jg20277.t1	71139.XP_010051840.1	0	1783	COG2217@1|root,KOG0207@2759|Eukaryota,37HKS@33090|Viridiplantae,3G75W@35493|Streptophyta	35493|Streptophyta	P	Copper-transporting ATPase	RAN1	GO:0000160,GO:0005575,GO:0005622,GO:0005623,GO:0005737,GO:0005768,GO:0005794,GO:0005802,GO:0007154,GO:0007165,GO:0008150,GO:0009719,GO:0009723,GO:0009725,GO:0009755,GO:0009873,GO:0009987,GO:0010033,GO:0010119,GO:0012505,GO:0016020,GO:0023052,GO:0031410,GO:0031982,GO:0031984,GO:0032870,GO:0035556,GO:0042221,GO:0043226,GO:0043227,GO:0043229,GO:0043231,GO:0044422,GO:0044424,GO:0044431,GO:0044444,GO:…	3.6.3.54	ko:K17686	ko01524,ko04016,map01524,map04016	-	R00086	RC00002	ko00000,ko00001,ko01000	3.A.3.5	-	-	E1-E2_ATPase,HMA,Hydrolase
file_1_file_1_jg20278.t1	71139.XP_010051842.1	2.32e-95	281	COG0526@1|root,KOG0907@2759|Eukaryota,37VFQ@33090|Viridiplantae,3GJI8@35493|Streptophyta	35493|Streptophyta	O	Thioredoxin	-	GO:0003674,GO:0003824,GO:0004791,GO:0005575,GO:0005622,GO:0005623,GO:0005737,GO:0005739,GO:0005759,GO:0006950,GO:0006979,GO:0008150,GO:0008152,GO:0009636,GO:0009987,GO:0015035,GO:0015036,GO:0016209,GO:0016491,GO:0016651,GO:0016667,GO:0016668,GO:0016671,GO:0019725,GO:0031974,GO:0033554,GO:0034599,GO:0042221,GO:0042592,GO:0043226,GO:0043227,GO:0043229,GO:0043231,GO:0043233,GO:0044422,GO:0044424,GO:…	-	ko:K03671	ko04621,ko05418,map04621,map05418	-	-	-	ko00000,ko00001,ko03110	-	-	-	Thioredoxin
file_1_file_1_jg20279.t1	71139.XP_010035359.1	0.000232	45.8	2CMG1@1|root,2QQ90@2759|Eukaryota,37NRX@33090|Viridiplantae,3G8K7@35493|Streptophyta	35493|Streptophyta	S	Inositol hexakisphosphate	-	-	-	-	-	-	-	-	-	-	-	-	PTPlike_phytase
file_1_file_1_jg20281.t1	71139.XP_010051844.1	1.53e-158	447	28U8Y@1|root,2R0ZN@2759|Eukaryota,37I49@33090|Viridiplantae,3G99V@35493|Streptophyta	35493|Streptophyta	S	Zinc-binding protein	-	-	-	-	-	-	-	-	-	-	-	-	PLATZ
file_1_file_1_jg20282.t1	71139.XP_010051845.1	1.86e-137	417	2CMI1@1|root,2QQDK@2759|Eukaryota,37J5N@33090|Viridiplantae,3GF20@35493|Streptophyta	35493|Streptophyta	S	Protein FAR-RED IMPAIRED RESPONSE	-	GO:0003674,GO:0003700,GO:0005575,GO:0005622,GO:0005623,GO:0005634,GO:0006355,GO:0007154,GO:0007165,GO:0007602,GO:0008150,GO:0009314,GO:0009416,GO:0009581,GO:0009582,GO:0009583,GO:0009585,GO:0009605,GO:0009628,GO:0009639,GO:0009889,GO:0009891,GO:0009893,GO:0009987,GO:0010017,GO:0010018,GO:0010218,GO:0010468,GO:0010556,GO:0010557,GO:0010604,GO:0010628,GO:0019219,GO:0019222,GO:0023052,GO:0031323,GO:…	-	-	-	-	-	-	-	-	-	-	FAR1,MULE,SWIM
file_1_file_1_jg20282.t2	71139.XP_010051845.1	3.9e-137	417	2CMI1@1|root,2QQDK@2759|Eukaryota,37J5N@33090|Viridiplantae,3GF20@35493|Streptophyta	35493|Streptophyta	S	Protein FAR-RED IMPAIRED RESPONSE	-	GO:0003674,GO:0003700,GO:0005575,GO:0005622,GO:0005623,GO:0005634,GO:0006355,GO:0007154,GO:0007165,GO:0007602,GO:0008150,GO:0009314,GO:0009416,GO:0009581,GO:0009582,GO:0009583,GO:0009585,GO:0009605,GO:0009628,GO:0009639,GO:0009889,GO:0009891,GO:0009893,GO:0009987,GO:0010017,GO:0010018,GO:0010218,GO:0010468,GO:0010556,GO:0010557,GO:0010604,GO:0010628,GO:0019219,GO:0019222,GO:0023052,GO:0031323,GO:…	-	-	-	-	-	-	-	-	-	-	FAR1,MULE,SWIM
file_1_file_1_jg20283.t1	71139.XP_010051845.1	3.13e-189	549	2CMI1@1|root,2QQDK@2759|Eukaryota,37J5N@33090|Viridiplantae,3GF20@35493|Streptophyta	35493|Streptophyta	S	Protein FAR-RED IMPAIRED RESPONSE	-	GO:0003674,GO:0003700,GO:0005575,GO:0005622,GO:0005623,GO:0005634,GO:0006355,GO:0007154,GO:0007165,GO:0007602,GO:0008150,GO:0009314,GO:0009416,GO:0009581,GO:0009582,GO:0009583,GO:0009585,GO:0009605,GO:0009628,GO:0009639,GO:0009889,GO:0009891,GO:0009893,GO:0009987,GO:0010017,GO:0010018,GO:0010218,GO:0010468,GO:0010556,GO:0010557,GO:0010604,GO:0010628,GO:0019219,GO:0019222,GO:0023052,GO:0031323,GO:…	-	-	-	-	-	-	-	-	-	-	FAR1,MULE,SWIM
file_1_file_1_jg20284.t1	71139.XP_010070209.1	6.2e-96	283	COG2938@1|root,KOG3326@2759|Eukaryota,37U80@33090|Viridiplantae,3GI3I@35493|Streptophyta	35493|Streptophyta	S	Flavinator of succinate dehydrogenase	-	GO:0006082,GO:0006091,GO:0006099,GO:0006101,GO:0006119,GO:0006121,GO:0006139,GO:0006163,GO:0006464,GO:0006725,GO:0006753,GO:0006793,GO:0006796,GO:0006807,GO:0006996,GO:0007005,GO:0008150,GO:0008152,GO:0009060,GO:0009117,GO:0009123,GO:0009126,GO:0009141,GO:0009144,GO:0009150,GO:0009161,GO:0009167,GO:0009199,GO:0009205,GO:0009259,GO:0009987,GO:0015980,GO:0016043,GO:0016310,GO:0016999,GO:0017144,GO:…	-	-	-	-	-	-	-	-	-	-	Sdh5
file_1_file_1_jg20285.t1	71139.XP_010051847.1	0	2205	COG0515@1|root,KOG0192@2759|Eukaryota,37HID@33090|Viridiplantae,3GA4V@35493|Streptophyta	35493|Streptophyta	T	(E 0.0) protein kinase family protein	-	-	-	-	-	-	-	-	-	-	-	-	PB1,Pkinase_Tyr
file_1_file_1_jg20286.t1	71139.XP_010051848.1	0	1287	COG3158@1|root,2QPSA@2759|Eukaryota,37JCM@33090|Viridiplantae,3GBDS@35493|Streptophyta	35493|Streptophyta	P	Potassium transporter	HAK11	GO:0003674,GO:0005215,GO:0005575,GO:0006810,GO:0006811,GO:0006812,GO:0006813,GO:0008150,GO:0008324,GO:0009987,GO:0015075,GO:0015077,GO:0015079,GO:0015318,GO:0015672,GO:0016020,GO:0022857,GO:0022890,GO:0030001,GO:0034220,GO:0046873,GO:0051179,GO:0051234,GO:0055085,GO:0071804,GO:0071805,GO:0098655,GO:0098660,GO:0098662	-	ko:K03549	-	-	-	-	ko00000,ko02000	2.A.72	-	-	K_trans
file_1_file_1_jg20287.t1	71139.XP_010051851.1	4.5e-203	563	COG1028@1|root,KOG0725@2759|Eukaryota,37MQZ@33090|Viridiplantae,3GHKV@35493|Streptophyta	35493|Streptophyta	Q	Peroxisomal 2,4-dienoyl-CoA	-	-	1.3.1.34	ko:K13237	ko04146,map04146	-	-	-	ko00000,ko00001,ko01000	-	-	-	adh_short_C2
file_1_file_1_jg20288.t1	71139.XP_010041850.1	3.95e-134	386	COG5147@1|root,KOG0048@2759|Eukaryota,37ZSM@33090|Viridiplantae,3GJP2@35493|Streptophyta	35493|Streptophyta	K	Myb-related protein	-	GO:0000981,GO:0000988,GO:0000989,GO:0001067,GO:0001076,GO:0001134,GO:0001135,GO:0003674,GO:0003676,GO:0003677,GO:0003700,GO:0005488,GO:0005575,GO:0005622,GO:0005623,GO:0005634,GO:0006355,GO:0006357,GO:0006950,GO:0008150,GO:0009266,GO:0009409,GO:0009628,GO:0009889,GO:0009891,GO:0009893,GO:0009987,GO:0010468,GO:0010556,GO:0010557,GO:0010604,GO:0010628,GO:0019219,GO:0019222,GO:0030154,GO:0031323,GO:…	-	ko:K09422	-	-	-	-	ko00000,ko03000	-	-	-	Myb_DNA-binding
file_1_file_1_jg20289.t1	71139.XP_010051856.1	1.05e-155	440	COG5147@1|root,KOG0048@2759|Eukaryota,37ZSM@33090|Viridiplantae,3GPQW@35493|Streptophyta	35493|Streptophyta	K	Myb-like DNA-binding domain	-	-	-	ko:K09422	-	-	-	-	ko00000,ko03000	-	-	-	Myb_DNA-binding
file_1_file_1_jg20290.t1	71139.XP_010030549.1	4.46e-78	240	COG5147@1|root,KOG0048@2759|Eukaryota,37ZSM@33090|Viridiplantae	33090|Viridiplantae	K	Myb-related protein	-	-	-	ko:K09422	-	-	-	-	ko00000,ko03000	-	-	-	Myb_DNA-binding
file_1_file_1_jg20291.t1	71139.XP_010030536.1	7.42e-68	213	COG5147@1|root,KOG0048@2759|Eukaryota,37ZSM@33090|Viridiplantae,3GPQW@35493|Streptophyta	35493|Streptophyta	K	Myb-like DNA-binding domain	-	-	-	ko:K09422	-	-	-	-	ko00000,ko03000	-	-	-	Myb_DNA-binding
file_1_file_1_jg20293.t1	71139.XP_010051860.1	1.96e-39	138	COG5147@1|root,KOG0048@2759|Eukaryota,37ZSM@33090|Viridiplantae,3GJP2@35493|Streptophyta	35493|Streptophyta	K	Myb-related protein	-	GO:0000981,GO:0000988,GO:0000989,GO:0001067,GO:0001076,GO:0001134,GO:0001135,GO:0003674,GO:0003676,GO:0003677,GO:0003700,GO:0005488,GO:0005575,GO:0005622,GO:0005623,GO:0005634,GO:0006355,GO:0006357,GO:0006950,GO:0008150,GO:0009266,GO:0009409,GO:0009628,GO:0009889,GO:0009891,GO:0009893,GO:0009987,GO:0010468,GO:0010556,GO:0010557,GO:0010604,GO:0010628,GO:0019219,GO:0019222,GO:0030154,GO:0031323,GO:…	-	ko:K09422	-	-	-	-	ko00000,ko03000	-	-	-	Myb_DNA-binding
file_1_file_1_jg20295.t1	71139.XP_010051861.1	0	2553	KOG1917@1|root,KOG1917@2759|Eukaryota,37JJS@33090|Viridiplantae,3GBAZ@35493|Streptophyta	35493|Streptophyta	O	grl,nap1,napp	-	GO:0000902,GO:0000904,GO:0005575,GO:0005622,GO:0005623,GO:0005634,GO:0005737,GO:0005783,GO:0005789,GO:0006355,GO:0006996,GO:0007010,GO:0007015,GO:0008064,GO:0008150,GO:0009653,GO:0009825,GO:0009888,GO:0009889,GO:0009891,GO:0009893,GO:0009987,GO:0010026,GO:0010090,GO:0010468,GO:0010556,GO:0010557,GO:0010604,GO:0010628,GO:0010638,GO:0012505,GO:0016020,GO:0016043,GO:0016049,GO:0019219,GO:0019222,GO:…	-	ko:K05750	ko04810,map04810	-	-	-	ko00000,ko00001	-	-	-	Nckap1
file_1_file_1_jg20296.t1	71139.XP_010054187.1	0	1026	COG0459@1|root,KOG0356@2759|Eukaryota,37S8P@33090|Viridiplantae,3GA5Z@35493|Streptophyta	35493|Streptophyta	O	Belongs to the chaperonin (HSP60) family	-	GO:0003674,GO:0005488,GO:0005515,GO:0005575,GO:0005622,GO:0005623,GO:0005737,GO:0005739,GO:0005829,GO:0006457,GO:0006458,GO:0006996,GO:0007005,GO:0008150,GO:0009507,GO:0009536,GO:0009987,GO:0016043,GO:0043226,GO:0043227,GO:0043229,GO:0043231,GO:0044183,GO:0044424,GO:0044444,GO:0044464,GO:0051082,GO:0061077,GO:0071840	-	-	-	-	-	-	-	-	-	-	Cpn60_TCP1
file_1_file_2_9598_t	71139.XP_010054187.1	0	1026	COG0459@1|root,KOG0356@2759|Eukaryota,37S8P@33090|Viridiplantae,3GA5Z@35493|Streptophyta	35493|Streptophyta	O	Belongs to the chaperonin (HSP60) family	-	GO:0003674,GO:0005488,GO:0005515,GO:0005575,GO:0005622,GO:0005623,GO:0005737,GO:0005739,GO:0005829,GO:0006457,GO:0006458,GO:0006996,GO:0007005,GO:0008150,GO:0009507,GO:0009536,GO:0009987,GO:0016043,GO:0043226,GO:0043227,GO:0043229,GO:0043231,GO:0044183,GO:0044424,GO:0044444,GO:0044464,GO:0051082,GO:0061077,GO:0071840	-	-	-	-	-	-	-	-	-	-	Cpn60_TCP1
file_1_file_1_jg20298.t1	71139.XP_010054492.1	1.06e-68	223	2EHDN@1|root,2SN2S@2759|Eukaryota	2759|Eukaryota	S	Toll - interleukin 1 - resistance	-	-	-	-	-	-	-	-	-	-	-	-	TIR
file_1_file_1_jg20299.t1	71139.XP_010054509.1	1.1e-14	78.2	KOG0800@1|root,KOG0800@2759|Eukaryota,37WPU@33090|Viridiplantae,3GKWS@35493|Streptophyta	35493|Streptophyta	O	finger protein	-	GO:0000003,GO:0000902,GO:0000904,GO:0003006,GO:0003674,GO:0003824,GO:0004842,GO:0006464,GO:0006807,GO:0007275,GO:0008150,GO:0008152,GO:0009653,GO:0009791,GO:0009826,GO:0009888,GO:0009987,GO:0010026,GO:0010154,GO:0016043,GO:0016049,GO:0016567,GO:0016740,GO:0019538,GO:0019787,GO:0022412,GO:0022414,GO:0030154,GO:0032446,GO:0032501,GO:0032502,GO:0032504,GO:0032989,GO:0036211,GO:0040007,GO:0043170,GO:…	2.3.2.27	ko:K22378	-	-	-	-	ko00000,ko01000,ko04121	-	-	-	zf-RING_2
file_1_file_1_jg20300.t1	71139.XP_010054492.1	3.83e-90	288	2EHDN@1|root,2SN2S@2759|Eukaryota	2759|Eukaryota	S	Toll - interleukin 1 - resistance	-	-	-	-	-	-	-	-	-	-	-	-	TIR
file_1_file_1_jg20301.t1	71139.XP_010054492.1	1e-37	142	2EHDN@1|root,2SN2S@2759|Eukaryota	2759|Eukaryota	S	Toll - interleukin 1 - resistance	-	-	-	-	-	-	-	-	-	-	-	-	TIR
file_1_file_1_jg20302.t1	71139.XP_010054492.1	1.05e-81	258	2EHDN@1|root,2SN2S@2759|Eukaryota	2759|Eukaryota	S	Toll - interleukin 1 - resistance	-	-	-	-	-	-	-	-	-	-	-	-	TIR
file_1_file_1_jg20303.t1	71139.XP_010052541.1	2.23e-110	318	COG0278@1|root,KOG0911@2759|Eukaryota,37TQ7@33090|Viridiplantae,3GIAH@35493|Streptophyta	35493|Streptophyta	O	Monothiol	-	GO:0003674,GO:0005488,GO:0005575,GO:0005622,GO:0005623,GO:0005737,GO:0005739,GO:0043167,GO:0043169,GO:0043226,GO:0043227,GO:0043229,GO:0043231,GO:0044424,GO:0044444,GO:0044464,GO:0046872	-	ko:K07390	-	-	-	-	ko00000,ko03029,ko03110	-	-	-	Glutaredoxin
file_1_file_1_jg20304.t1	71139.XP_010052529.1	9.4e-78	236	COG0509@1|root,KOG3373@2759|Eukaryota,37U3Y@33090|Viridiplantae,3GHXS@35493|Streptophyta	35493|Streptophyta	E	The H protein shuttles the methylamine group of glycine from the P protein to the T protein	-	-	-	ko:K02437	ko00260,ko00630,ko01100,ko01110,ko01130,ko01200,map00260,map00630,map01100,map01110,map01130,map01200	M00532	R01221	RC00022,RC02834	ko00000,ko00001,ko00002	-	-	-	GCV_H
file_1_file_2_9604_t	71139.XP_010052529.1	6.57e-96	280	COG0509@1|root,KOG3373@2759|Eukaryota,37U3Y@33090|Viridiplantae,3GHXS@35493|Streptophyta	35493|Streptophyta	E	The H protein shuttles the methylamine group of glycine from the P protein to the T protein	-	-	-	ko:K02437	ko00260,ko00630,ko01100,ko01110,ko01130,ko01200,map00260,map00630,map01100,map01110,map01130,map01200	M00532	R01221	RC00022,RC02834	ko00000,ko00001,ko00002	-	-	-	GCV_H
file_1_file_1_jg20305.t1	71139.XP_010052528.1	8.61e-117	365	KOG4197@1|root,KOG4197@2759|Eukaryota,37R67@33090|Viridiplantae,3GAUT@35493|Streptophyta	35493|Streptophyta	G	Pentatricopeptide repeat-containing protein	-	GO:0003674,GO:0003676,GO:0003723,GO:0003824,GO:0004518,GO:0004519,GO:0005488,GO:0005575,GO:0005622,GO:0005623,GO:0006139,GO:0006725,GO:0006807,GO:0008150,GO:0008152,GO:0009451,GO:0009987,GO:0016070,GO:0016787,GO:0016788,GO:0034641,GO:0043170,GO:0043226,GO:0043227,GO:0043229,GO:0043231,GO:0043412,GO:0044237,GO:0044238,GO:0044424,GO:0044464,GO:0046483,GO:0071704,GO:0090304,GO:0090305,GO:0097159,GO:…	-	-	-	-	-	-	-	-	-	-	PPR,PPR_2,PPR_3
file_1_file_1_jg20306.t1	71139.XP_010052527.1	3.6e-94	279	2E1QC@1|root,2S90I@2759|Eukaryota,37X23@33090|Viridiplantae,3GKTW@35493|Streptophyta	35493|Streptophyta	-	-	-	-	-	-	-	-	-	-	-	-	-	-	-
file_1_file_1_jg20307.t1	71139.XP_010052526.1	0	1067	KOG4197@1|root,KOG4197@2759|Eukaryota,37SZC@33090|Viridiplantae,3GBPD@35493|Streptophyta	35493|Streptophyta	S	Pentatricopeptide repeat-containing protein	-	-	-	-	-	-	-	-	-	-	-	-	PPR,PPR_2
file_1_file_1_jg20308.t1	71139.XP_010052523.1	1.35e-60	202	2CMT5@1|root,2QRU6@2759|Eukaryota,37QW1@33090|Viridiplantae,3GGVV@35493|Streptophyta	35493|Streptophyta	S	APO protein 3	-	-	-	-	-	-	-	-	-	-	-	-	APO_RNA-bind
file_1_file_1_jg20309.t1	71139.XP_010052522.1	2.04e-253	709	2CJNU@1|root,2R98H@2759|Eukaryota,37PG2@33090|Viridiplantae,3GFM4@35493|Streptophyta	35493|Streptophyta	S	Protein ENDOSPERM DEFECTIVE	-	GO:0000003,GO:0000226,GO:0003006,GO:0005575,GO:0005622,GO:0005623,GO:0005634,GO:0005737,GO:0005856,GO:0005874,GO:0005880,GO:0006996,GO:0007010,GO:0007017,GO:0007275,GO:0007349,GO:0008150,GO:0009653,GO:0009791,GO:0009888,GO:0009960,GO:0009987,GO:0010154,GO:0010342,GO:0015630,GO:0016043,GO:0022414,GO:0032501,GO:0032502,GO:0043226,GO:0043227,GO:0043228,GO:0043229,GO:0043231,GO:0043232,GO:0044422,GO:…	-	-	-	-	-	-	-	-	-	-	QWRF
file_1_file_1_jg20310.t1	71139.XP_010052520.1	1.08e-141	403	KOG0118@1|root,KOG0118@2759|Eukaryota,37RJN@33090|Viridiplantae,3GDN0@35493|Streptophyta	35493|Streptophyta	S	Phosphoglycerate mutase family	-	GO:0003674,GO:0003824,GO:0005575,GO:0005622,GO:0005623,GO:0005737,GO:0005829,GO:0006793,GO:0006796,GO:0008150,GO:0008152,GO:0009507,GO:0009536,GO:0009987,GO:0016311,GO:0016787,GO:0016788,GO:0016791,GO:0042578,GO:0043226,GO:0043227,GO:0043229,GO:0043231,GO:0044237,GO:0044424,GO:0044444,GO:0044464	-	-	-	-	-	-	-	-	-	-	His_Phos_1
file_1_file_1_jg20311.t1	2711.XP_006467243.1	4.81e-109	325	28KG7@1|root,2QU84@2759|Eukaryota,37RJF@33090|Viridiplantae,3GBVR@35493|Streptophyta	35493|Streptophyta	K	MYB family transcription factor	-	GO:0003674,GO:0003700,GO:0005575,GO:0005622,GO:0005623,GO:0005634,GO:0006355,GO:0008150,GO:0009888,GO:0009889,GO:0009891,GO:0009893,GO:0010087,GO:0010088,GO:0010089,GO:0010468,GO:0010556,GO:0010557,GO:0010604,GO:0010628,GO:0019219,GO:0019222,GO:0031323,GO:0031325,GO:0031326,GO:0031328,GO:0032502,GO:0043226,GO:0043227,GO:0043229,GO:0043231,GO:0044424,GO:0044464,GO:0045893,GO:0045935,GO:0048518,GO:…	-	-	-	-	-	-	-	-	-	-	Myb_CC_LHEQLE,Myb_DNA-binding
file_1_file_1_jg20312.t1	71139.XP_010052516.1	1.22e-306	844	KOG2664@1|root,KOG2664@2759|Eukaryota,37N25@33090|Viridiplantae,3G78T@35493|Streptophyta	35493|Streptophyta	K	snRNA-activating protein complex	-	GO:0000003,GO:0000578,GO:0003002,GO:0003006,GO:0003674,GO:0003676,GO:0003677,GO:0005488,GO:0005575,GO:0005622,GO:0005623,GO:0005634,GO:0006139,GO:0006351,GO:0006366,GO:0006725,GO:0006807,GO:0006810,GO:0007049,GO:0007275,GO:0007389,GO:0008150,GO:0008152,GO:0009058,GO:0009059,GO:0009301,GO:0009653,GO:0009719,GO:0009725,GO:0009733,GO:0009735,GO:0009790,GO:0009791,GO:0009793,GO:0009798,GO:0009880,GO:…	-	ko:K15210	-	-	-	-	ko00000,ko03021	-	-	-	zf-SNAP50_C
file_1_file_1_jg20313.t1	71139.XP_010052518.1	0	1019	COG2304@1|root,2QPSB@2759|Eukaryota,37J0A@33090|Viridiplantae,3G9RQ@35493|Streptophyta	35493|Streptophyta	O	Zinc finger, C3HC4 type (RING finger)	-	-	-	-	-	-	-	-	-	-	-	-	VWA_2,zf-C3HC4,zf-RING_2,zf-rbx1
file_1_file_1_jg20314.t1	71139.XP_010052515.1	4.2e-82	248	2BNY2@1|root,2S1QM@2759|Eukaryota,37VS1@33090|Viridiplantae,3GJSI@35493|Streptophyta	35493|Streptophyta	S	Plant invertase/pectin methylesterase inhibitor	-	-	-	-	-	-	-	-	-	-	-	-	PMEI
file_1_file_1_jg20315.t1	71139.XP_010052514.1	1.37e-50	165	2BNY2@1|root,2S1QM@2759|Eukaryota,37VS1@33090|Viridiplantae,3GJSI@35493|Streptophyta	35493|Streptophyta	S	Plant invertase/pectin methylesterase inhibitor	-	-	-	-	-	-	-	-	-	-	-	-	PMEI
file_1_file_1_jg20316.t1	71139.XP_010052514.1	2.05e-49	164	2BNY2@1|root,2S1QM@2759|Eukaryota,37VS1@33090|Viridiplantae,3GJSI@35493|Streptophyta	35493|Streptophyta	S	Plant invertase/pectin methylesterase inhibitor	-	-	-	-	-	-	-	-	-	-	-	-	PMEI
file_1_file_1_jg20317.t1	71139.XP_010052503.1	0	1084	28INK@1|root,2QQZJ@2759|Eukaryota,37NG9@33090|Viridiplantae,3GARI@35493|Streptophyta	35493|Streptophyta	G	Belongs to the glycosyltransferase 8 family	-	GO:0003674,GO:0003824,GO:0005575,GO:0005622,GO:0005623,GO:0005737,GO:0005794,GO:0008194,GO:0012505,GO:0016740,GO:0016757,GO:0016758,GO:0043226,GO:0043227,GO:0043229,GO:0043231,GO:0044424,GO:0044444,GO:0044464,GO:0047262	2.4.1.43	ko:K13648	ko00520,map00520	-	R05191	RC00005	ko00000,ko00001,ko01000,ko01003	-	GT8	-	Glyco_transf_8
file_1_file_2_9619_t	71139.XP_010052503.1	0	1184	28INK@1|root,2QQZJ@2759|Eukaryota,37NG9@33090|Viridiplantae,3GARI@35493|Streptophyta	35493|Streptophyta	G	Belongs to the glycosyltransferase 8 family	-	GO:0003674,GO:0003824,GO:0005575,GO:0005622,GO:0005623,GO:0005737,GO:0005794,GO:0008194,GO:0012505,GO:0016740,GO:0016757,GO:0016758,GO:0043226,GO:0043227,GO:0043229,GO:0043231,GO:0044424,GO:0044444,GO:0044464,GO:0047262	2.4.1.43	ko:K13648	ko00520,map00520	-	R05191	RC00005	ko00000,ko00001,ko01000,ko01003	-	GT8	-	Glyco_transf_8
file_1_file_1_jg20318.t1	4432.XP_010252975.1	4.65e-10	61.2	2E4ZG@1|root,2SBU4@2759|Eukaryota,37XN4@33090|Viridiplantae,3GMJI@35493|Streptophyta	35493|Streptophyta	-	-	-	-	-	-	-	-	-	-	-	-	-	-	-
file_1_file_1_jg20318.t2	4432.XP_010252975.1	2.06e-09	61.6	2E4ZG@1|root,2SBU4@2759|Eukaryota,37XN4@33090|Viridiplantae,3GMJI@35493|Streptophyta	35493|Streptophyta	-	-	-	-	-	-	-	-	-	-	-	-	-	-	-
file_1_file_1_jg20319.t1	71139.XP_010052500.1	0	1146	KOG4197@1|root,KOG4197@2759|Eukaryota,37HY9@33090|Viridiplantae,3GBJA@35493|Streptophyta	35493|Streptophyta	S	Pentatricopeptide repeat-containing protein	-	GO:0003674,GO:0003676,GO:0003723,GO:0003824,GO:0004518,GO:0004519,GO:0005488,GO:0005575,GO:0005622,GO:0005623,GO:0006139,GO:0006725,GO:0006807,GO:0008150,GO:0008152,GO:0009451,GO:0009987,GO:0016070,GO:0016787,GO:0016788,GO:0034641,GO:0043170,GO:0043226,GO:0043227,GO:0043229,GO:0043231,GO:0043412,GO:0044237,GO:0044238,GO:0044424,GO:0044464,GO:0046483,GO:0071704,GO:0090304,GO:0090305,GO:0097159,GO:…	-	-	-	-	-	-	-	-	-	-	DYW_deaminase,PPR,PPR_2
file_1_file_1_jg20320.t1	71139.XP_010042323.1	5.35e-66	203	COG0484@1|root,KOG0712@2759|Eukaryota,37WBD@33090|Viridiplantae,3GKA7@35493|Streptophyta	35493|Streptophyta	O	Chaperone protein DNAj	-	GO:0005575,GO:0005622,GO:0005623,GO:0005634,GO:0005737,GO:0009507,GO:0009536,GO:0043226,GO:0043227,GO:0043229,GO:0043231,GO:0044424,GO:0044444,GO:0044464	-	-	-	-	-	-	-	-	-	-	DnaJ
file_1_file_1_jg20321.t1	3694.POPTR_0006s00360.1	2.24e-148	417	COG1100@1|root,KOG0098@2759|Eukaryota,37PZ3@33090|Viridiplantae,3G88B@35493|Streptophyta,4JMVJ@91835|fabids	35493|Streptophyta	U	Ras-related protein	-	GO:0005575,GO:0005622,GO:0005623,GO:0005737,GO:0005768,GO:0005773,GO:0005886,GO:0006810,GO:0006888,GO:0008150,GO:0012505,GO:0016020,GO:0016192,GO:0030100,GO:0031410,GO:0031982,GO:0032879,GO:0043226,GO:0043227,GO:0043229,GO:0043231,GO:0044424,GO:0044444,GO:0044464,GO:0046907,GO:0048193,GO:0050789,GO:0050794,GO:0051049,GO:0051128,GO:0051179,GO:0051234,GO:0051641,GO:0051649,GO:0060627,GO:0065007,GO:…	-	ko:K07877	ko04152,map04152	-	-	-	ko00000,ko00001,ko04031,ko04131,ko04147	-	-	-	Ras
file_1_file_1_jg20322.t1	71139.XP_010052498.1	0	889	COG0205@1|root,KOG2440@2759|Eukaryota,37JM8@33090|Viridiplantae,3GB5J@35493|Streptophyta	35493|Streptophyta	G	Catalyzes the phosphorylation of D-fructose 6-phosphate to fructose 1,6-bisphosphate by ATP, the first committing step of glycolysis	-	GO:0003674,GO:0003824,GO:0003872,GO:0005575,GO:0005622,GO:0005623,GO:0005737,GO:0005829,GO:0005975,GO:0006082,GO:0006090,GO:0006091,GO:0006096,GO:0006139,GO:0006163,GO:0006164,GO:0006165,GO:0006725,GO:0006732,GO:0006733,GO:0006753,GO:0006754,GO:0006757,GO:0006793,GO:0006796,GO:0006807,GO:0008150,GO:0008152,GO:0008443,GO:0009056,GO:0009058,GO:0009108,GO:0009117,GO:0009123,GO:0009124,GO:0009126,GO:…	2.7.1.11	ko:K00850	ko00010,ko00030,ko00051,ko00052,ko00680,ko01100,ko01110,ko01120,ko01130,ko01200,ko01230,ko03018,ko04152,ko05230,map00010,map00030,map00051,map00052,map00680,map01100,map01110,map01120,map01130,map01200,map01230,map03018,map04152,map05230	M00001,M00345	R00756,R03236,R03237,R03238,R03239,R04779	RC00002,RC00017	ko00000,ko00001,ko00002,ko01000,ko01009,ko03019	-	-	-	PFK
file_1_file_1_jg20323.t1	71139.XP_010052494.1	0	907	2CMCP@1|root,2QPZ6@2759|Eukaryota,37MG6@33090|Viridiplantae,3GDWX@35493|Streptophyta	35493|Streptophyta	G	Belongs to the glycosyl hydrolase 17 family	-	GO:0001871,GO:0003674,GO:0003824,GO:0004553,GO:0005488,GO:0005575,GO:0005618,GO:0005622,GO:0005623,GO:0005737,GO:0005773,GO:0005886,GO:0005911,GO:0009505,GO:0009506,GO:0016020,GO:0016787,GO:0016798,GO:0030054,GO:0030246,GO:0030247,GO:0030312,GO:0031224,GO:0031225,GO:0031226,GO:0043226,GO:0043227,GO:0043229,GO:0043231,GO:0044424,GO:0044425,GO:0044444,GO:0044459,GO:0044464,GO:0046658,GO:0055044,GO:…	-	-	-	-	-	-	-	-	-	-	Glyco_hydro_17,X8
file_1_file_1_jg20324.t1	71139.XP_010052495.1	2.08e-256	707	KOG1327@1|root,KOG1327@2759|Eukaryota,37IJH@33090|Viridiplantae,3G7B7@35493|Streptophyta	35493|Streptophyta	O	E3 ubiquitin-protein ligase	-	-	2.3.2.27	ko:K16280	-	-	-	-	ko00000,ko01000,ko04121	-	-	-	Copine,zf-C3HC4_3
file_1_file_1_jg20325.t1	71139.XP_010054485.1	5.97e-73	238	COG0666@1|root,KOG0504@2759|Eukaryota,37URK@33090|Viridiplantae,3GHSZ@35493|Streptophyta	35493|Streptophyta	S	ankyrin repeat-containing protein	-	GO:0001653,GO:0002376,GO:0003674,GO:0003824,GO:0004383,GO:0004672,GO:0004674,GO:0005575,GO:0005622,GO:0005623,GO:0005737,GO:0005783,GO:0005886,GO:0006139,GO:0006163,GO:0006164,GO:0006182,GO:0006464,GO:0006468,GO:0006725,GO:0006753,GO:0006793,GO:0006796,GO:0006807,GO:0006950,GO:0006952,GO:0006955,GO:0007154,GO:0007165,GO:0008150,GO:0008152,GO:0009058,GO:0009117,GO:0009150,GO:0009152,GO:0009165,GO:…	-	-	-	-	-	-	-	-	-	-	Ank_2,Ank_4,Ank_5,PGG
file_1_file_1_jg20326.t1	71139.XP_010039479.1	1.65e-76	246	COG0666@1|root,KOG0504@2759|Eukaryota,37URK@33090|Viridiplantae,3GB0D@35493|Streptophyta	35493|Streptophyta	S	ankyrin repeat family protein	-	-	-	-	-	-	-	-	-	-	-	-	Ank,Ank_2,Ank_4,PGG
file_1_file_1_jg20327.t1	71139.XP_010054485.1	7.15e-79	252	COG0666@1|root,KOG0504@2759|Eukaryota,37URK@33090|Viridiplantae,3GHSZ@35493|Streptophyta	35493|Streptophyta	S	ankyrin repeat-containing protein	-	GO:0001653,GO:0002376,GO:0003674,GO:0003824,GO:0004383,GO:0004672,GO:0004674,GO:0005575,GO:0005622,GO:0005623,GO:0005737,GO:0005783,GO:0005886,GO:0006139,GO:0006163,GO:0006164,GO:0006182,GO:0006464,GO:0006468,GO:0006725,GO:0006753,GO:0006793,GO:0006796,GO:0006807,GO:0006950,GO:0006952,GO:0006955,GO:0007154,GO:0007165,GO:0008150,GO:0008152,GO:0009058,GO:0009117,GO:0009150,GO:0009152,GO:0009165,GO:…	-	-	-	-	-	-	-	-	-	-	Ank_2,Ank_4,Ank_5,PGG
file_1_file_1_jg20328.t1	71139.XP_010052486.1	0	973	2CMNG@1|root,2QQZH@2759|Eukaryota,37PKG@33090|Viridiplantae,3GEF8@35493|Streptophyta	35493|Streptophyta	S	Belongs to the NPH3 family	-	-	-	-	-	-	-	-	-	-	-	-	BTB,NPH3
file_1_file_1_jg20328.t2	71139.XP_010052486.1	0	979	2CMNG@1|root,2QQZH@2759|Eukaryota,37PKG@33090|Viridiplantae,3GEF8@35493|Streptophyta	35493|Streptophyta	S	Belongs to the NPH3 family	-	-	-	-	-	-	-	-	-	-	-	-	BTB,NPH3
file_1_file_1_jg20330.t1	71139.XP_010052485.1	9.51e-24	102	KOG2262@1|root,KOG2262@2759|Eukaryota,37NV0@33090|Viridiplantae,3GBBY@35493|Streptophyta	35493|Streptophyta	T	oligopeptide transporter	-	GO:0003674,GO:0005215,GO:0005575,GO:0005623,GO:0005886,GO:0005887,GO:0006810,GO:0006857,GO:0008150,GO:0015833,GO:0016020,GO:0016021,GO:0022857,GO:0031224,GO:0031226,GO:0035672,GO:0035673,GO:0042886,GO:0042887,GO:0044425,GO:0044459,GO:0044464,GO:0051179,GO:0051234,GO:0055085,GO:0071702,GO:0071705,GO:0071944,GO:1904680	-	-	-	-	-	-	-	-	-	-	OPT
file_1_file_1_jg20332.t1	71139.XP_010052485.1	4.21e-22	95.9	KOG2262@1|root,KOG2262@2759|Eukaryota,37NV0@33090|Viridiplantae,3GBBY@35493|Streptophyta	35493|Streptophyta	T	oligopeptide transporter	-	GO:0003674,GO:0005215,GO:0005575,GO:0005623,GO:0005886,GO:0005887,GO:0006810,GO:0006857,GO:0008150,GO:0015833,GO:0016020,GO:0016021,GO:0022857,GO:0031224,GO:0031226,GO:0035672,GO:0035673,GO:0042886,GO:0042887,GO:0044425,GO:0044459,GO:0044464,GO:0051179,GO:0051234,GO:0055085,GO:0071702,GO:0071705,GO:0071944,GO:1904680	-	-	-	-	-	-	-	-	-	-	OPT
file_1_file_1_jg20334.t1	71139.XP_010067671.1	2.89e-29	117	KOG4197@1|root,KOG4197@2759|Eukaryota,37N5Q@33090|Viridiplantae,3GH38@35493|Streptophyta	35493|Streptophyta	O	Pentatricopeptide repeat-containing protein	-	GO:0003674,GO:0003676,GO:0003723,GO:0003824,GO:0004518,GO:0004519,GO:0005488,GO:0005575,GO:0005622,GO:0005623,GO:0005737,GO:0006139,GO:0006725,GO:0006807,GO:0008150,GO:0008152,GO:0009451,GO:0009507,GO:0009536,GO:0009987,GO:0016070,GO:0016071,GO:0016556,GO:0016787,GO:0016788,GO:0034641,GO:0043170,GO:0043226,GO:0043227,GO:0043229,GO:0043231,GO:0043412,GO:0044237,GO:0044238,GO:0044424,GO:0044444,GO:…	-	-	-	-	-	-	-	-	-	-	DYW_deaminase,PPR,PPR_2
file_1_file_1_jg11289.t1	71139.XP_010068556.1	0	1087	KOG1471@1|root,KOG1471@2759|Eukaryota,37NEZ@33090|Viridiplantae,3G72N@35493|Streptophyta	35493|Streptophyta	I	phosphatidylinositol phosphatidylcholine transfer protein	-	GO:0000003,GO:0000226,GO:0003006,GO:0003674,GO:0005215,GO:0005319,GO:0005548,GO:0005575,GO:0005622,GO:0005623,GO:0005628,GO:0005634,GO:0005886,GO:0006810,GO:0006811,GO:0006820,GO:0006869,GO:0006996,GO:0007010,GO:0007017,GO:0007049,GO:0008150,GO:0008525,GO:0008526,GO:0009653,GO:0009987,GO:0010876,GO:0010927,GO:0015711,GO:0015748,GO:0015914,GO:0016020,GO:0016043,GO:0016192,GO:0019953,GO:0022402,GO:…	3.4.25.1	ko:K02725	ko03050,map03050	M00337,M00340	-	-	ko00000,ko00001,ko00002,ko01000,ko01002,ko03051,ko04147	-	-	-	CRAL_TRIO,CRAL_TRIO_N
file_1_file_1_jg11290.t1	71139.XP_010057061.1	4.28e-33	122	KOG3261@1|root,KOG3261@2759|Eukaryota,37HTX@33090|Viridiplantae,3GECV@35493|Streptophyta	35493|Streptophyta	S	Protein N-terminal glutamine	-	-	3.5.1.122	ko:K21286	-	-	R11560	RC00010	ko00000,ko01000	-	-	-	Nt_Gln_amidase
file_1_file_1_jg11291.t1	71139.XP_010066132.1	0	902	COG0207@1|root,COG0262@1|root,KOG0673@2759|Eukaryota,KOG1324@2759|Eukaryota,37IFR@33090|Viridiplantae,3GAR2@35493|Streptophyta	35493|Streptophyta	H	Bifunctional enzyme. Involved in de novo dTMP biosynthesis. Key enzyme in folate metabolism	-	GO:0003674,GO:0003824,GO:0004146,GO:0004799,GO:0005575,GO:0005622,GO:0005623,GO:0005737,GO:0005829,GO:0006082,GO:0006575,GO:0006725,GO:0006732,GO:0006760,GO:0006807,GO:0008150,GO:0008152,GO:0008168,GO:0009058,GO:0009108,GO:0009256,GO:0009257,GO:0009396,GO:0009987,GO:0016053,GO:0016491,GO:0016645,GO:0016646,GO:0016740,GO:0016741,GO:0018130,GO:0019438,GO:0019752,GO:0032259,GO:0034641,GO:0042083,GO:…	1.5.1.3,2.1.1.45	ko:K13998	ko00240,ko00670,ko00790,ko01100,map00240,map00670,map00790,map01100	M00053,M00126,M00841	R00936,R00937,R00939,R00940,R02101,R02235,R02236	RC00109,RC00110,RC00158,RC00219,RC00332	ko00000,ko00001,ko00002,ko01000	-	-	-	DHFR_1,Thymidylat_synt
file_1_file_1_jg11291.t2	71139.XP_010066132.1	0	902	COG0207@1|root,COG0262@1|root,KOG0673@2759|Eukaryota,KOG1324@2759|Eukaryota,37IFR@33090|Viridiplantae,3GAR2@35493|Streptophyta	35493|Streptophyta	H	Bifunctional enzyme. Involved in de novo dTMP biosynthesis. Key enzyme in folate metabolism	-	GO:0003674,GO:0003824,GO:0004146,GO:0004799,GO:0005575,GO:0005622,GO:0005623,GO:0005737,GO:0005829,GO:0006082,GO:0006575,GO:0006725,GO:0006732,GO:0006760,GO:0006807,GO:0008150,GO:0008152,GO:0008168,GO:0009058,GO:0009108,GO:0009256,GO:0009257,GO:0009396,GO:0009987,GO:0016053,GO:0016491,GO:0016645,GO:0016646,GO:0016740,GO:0016741,GO:0018130,GO:0019438,GO:0019752,GO:0032259,GO:0034641,GO:0042083,GO:…	1.5.1.3,2.1.1.45	ko:K13998	ko00240,ko00670,ko00790,ko01100,map00240,map00670,map00790,map01100	M00053,M00126,M00841	R00936,R00937,R00939,R00940,R02101,R02235,R02236	RC00109,RC00110,RC00158,RC00219,RC00332	ko00000,ko00001,ko00002,ko01000	-	-	-	DHFR_1,Thymidylat_synt
file_1_file_1_jg11293.t1	2711.XP_006487218.1	1.5e-51	164	COG4901@1|root,KOG1767@2759|Eukaryota,37UJR@33090|Viridiplantae,3GIPV@35493|Streptophyta	35493|Streptophyta	J	40s ribosomal protein	-	-	-	ko:K02975	ko03010,map03010	M00177,M00179	-	-	br01610,ko00000,ko00001,ko00002,ko03011	-	-	-	Ribosomal_S25
file_1_file_1_jg11294.t1	71139.XP_010070475.1	0.000544	47	COG5043@1|root,KOG1809@2759|Eukaryota,37SI3@33090|Viridiplantae,3GF65@35493|Streptophyta	35493|Streptophyta	U	regulation of parkin-mediated stimulation of mitophagy in response to mitochondrial depolarization	-	-	-	-	-	-	-	-	-	-	-	-	SHR-BD,VPS13_C
file_1_file_1_jg11295.t1	71139.XP_010025621.1	3.74e-72	230	COG1562@1|root,KOG1459@2759|Eukaryota,37KJ2@33090|Viridiplantae,3G99P@35493|Streptophyta	35493|Streptophyta	I	squalene	sqs1	GO:0003674,GO:0003824,GO:0004310,GO:0004311,GO:0004659,GO:0005575,GO:0005622,GO:0005623,GO:0005737,GO:0005783,GO:0005789,GO:0005886,GO:0006629,GO:0006644,GO:0006694,GO:0006720,GO:0006721,GO:0006793,GO:0006796,GO:0008150,GO:0008152,GO:0008202,GO:0008610,GO:0009058,GO:0009987,GO:0012505,GO:0016020,GO:0016125,GO:0016126,GO:0016740,GO:0016765,GO:0019637,GO:0031984,GO:0042175,GO:0043226,GO:0043227,GO:…	2.5.1.21	ko:K00801	ko00100,ko00909,ko01100,ko01110,ko01130,map00100,map00909,map01100,map01110,map01130	-	R00702,R02872,R06223	RC00362,RC00796,RC02839	ko00000,ko00001,ko01000,ko01006	-	-	-	SQS_PSY
file_1_file_1_jg11296.t1	71139.XP_010066174.1	0	1104	28PAE@1|root,2QVXQ@2759|Eukaryota,37Q8B@33090|Viridiplantae,3GH6H@35493|Streptophyta	35493|Streptophyta	S	F-Box protein	-	GO:0005575,GO:0005622,GO:0005623,GO:0005634,GO:0006355,GO:0006996,GO:0007610,GO:0007622,GO:0007623,GO:0008150,GO:0009628,GO:0009657,GO:0009658,GO:0009889,GO:0009891,GO:0009893,GO:0009987,GO:0010468,GO:0010556,GO:0010557,GO:0010604,GO:0010628,GO:0016043,GO:0019219,GO:0019222,GO:0031323,GO:0031325,GO:0031326,GO:0031328,GO:0043226,GO:0043227,GO:0043229,GO:0043231,GO:0044424,GO:0044464,GO:0045893,GO:…	-	-	-	-	-	-	-	-	-	-	-
file_1_file_1_jg11297.t1	71139.XP_010066171.1	6.9e-174	492	28KYA@1|root,2QTF0@2759|Eukaryota,37JAJ@33090|Viridiplantae,3GAKF@35493|Streptophyta	35493|Streptophyta	S	reductase	-	GO:0003674,GO:0003824,GO:0008150,GO:0008152,GO:0010283,GO:0016491,GO:0016627,GO:0016628,GO:0055114	-	-	-	-	-	-	-	-	-	-	NmrA
file_1_file_1_jg11298.t1	71139.XP_010066173.1	1.46e-125	360	COG5249@1|root,KOG1688@2759|Eukaryota,37MCH@33090|Viridiplantae,3GAEC@35493|Streptophyta	35493|Streptophyta	U	Involved in the retrieval of endoplasmic reticulum membrane proteins from the early Golgi compartment	-	GO:0005575,GO:0005622,GO:0005623,GO:0005737,GO:0005783,GO:0005794,GO:0005801,GO:0006810,GO:0006890,GO:0008150,GO:0012505,GO:0016192,GO:0043226,GO:0043227,GO:0043229,GO:0043231,GO:0044422,GO:0044424,GO:0044431,GO:0044444,GO:0044446,GO:0044464,GO:0048193,GO:0051179,GO:0051234	-	-	-	-	-	-	-	-	-	-	Rer1
file_1_file_1_jg11299.t1	71139.XP_010066169.1	1.23e-199	556	COG4677@1|root,2QSQ4@2759|Eukaryota,37SD6@33090|Viridiplantae,3GAYV@35493|Streptophyta	35493|Streptophyta	G	pectinesterase	-	-	3.1.1.11	ko:K01051	ko00040,ko01100,map00040,map01100	M00081	R02362	RC00460,RC00461	ko00000,ko00001,ko00002,ko01000	-	-	-	Pectinesterase
file_1_file_1_jg11301.t1	71139.XP_010066167.1	5.52e-191	543	2CCVI@1|root,2QT6X@2759|Eukaryota,37K4H@33090|Viridiplantae,3G7XA@35493|Streptophyta	35493|Streptophyta	K	transcription factor	-	GO:0003674,GO:0003676,GO:0003677,GO:0003700,GO:0005488,GO:0005575,GO:0005622,GO:0005623,GO:0005634,GO:0006139,GO:0006351,GO:0006355,GO:0006725,GO:0006807,GO:0008150,GO:0008152,GO:0009058,GO:0009059,GO:0009314,GO:0009416,GO:0009628,GO:0009637,GO:0009889,GO:0009909,GO:0009911,GO:0009987,GO:0010467,GO:0010468,GO:0010556,GO:0016070,GO:0018130,GO:0019219,GO:0019222,GO:0019438,GO:0031323,GO:0031326,GO:…	-	-	-	-	-	-	-	-	-	-	HLH
file_1_file_2_19728_t	71139.XP_010066167.1	1.61e-192	547	2CCVI@1|root,2QT6X@2759|Eukaryota,37K4H@33090|Viridiplantae,3G7XA@35493|Streptophyta	35493|Streptophyta	K	transcription factor	-	GO:0003674,GO:0003676,GO:0003677,GO:0003700,GO:0005488,GO:0005575,GO:0005622,GO:0005623,GO:0005634,GO:0006139,GO:0006351,GO:0006355,GO:0006725,GO:0006807,GO:0008150,GO:0008152,GO:0009058,GO:0009059,GO:0009314,GO:0009416,GO:0009628,GO:0009637,GO:0009889,GO:0009909,GO:0009911,GO:0009987,GO:0010467,GO:0010468,GO:0010556,GO:0016070,GO:0018130,GO:0019219,GO:0019222,GO:0019438,GO:0031323,GO:0031326,GO:…	-	-	-	-	-	-	-	-	-	-	HLH
file_1_file_1_jg13666.t1	71139.XP_010043897.1	8.28e-163	460	29E48@1|root,2RM8S@2759|Eukaryota,37S3R@33090|Viridiplantae,3GD1H@35493|Streptophyta	35493|Streptophyta	K	MYB family transcription factor	-	-	-	-	-	-	-	-	-	-	-	-	Myb_DNA-binding
file_1_file_1_jg13668.t1	71139.XP_010043896.1	4.39e-313	870	KOG1721@1|root,KOG1721@2759|Eukaryota,37K9M@33090|Viridiplantae,3GEEU@35493|Streptophyta	35493|Streptophyta	S	Zinc finger protein	-	GO:0003674,GO:0003700,GO:0005575,GO:0005622,GO:0005623,GO:0005634,GO:0006355,GO:0007275,GO:0008150,GO:0008356,GO:0009889,GO:0009987,GO:0010468,GO:0010556,GO:0019219,GO:0019222,GO:0022622,GO:0031323,GO:0031326,GO:0032501,GO:0032502,GO:0043226,GO:0043227,GO:0043229,GO:0043231,GO:0044424,GO:0044464,GO:0048364,GO:0048731,GO:0048856,GO:0050789,GO:0050794,GO:0051171,GO:0051252,GO:0051301,GO:0060255,GO:…	-	-	-	-	-	-	-	-	-	-	zf-C2H2,zf-C2H2_6,zf-C2H2_jaz
file_1_file_1_jg13669.t1	71139.XP_010043895.1	0	1268	KOG0389@1|root,KOG0389@2759|Eukaryota,37SNU@33090|Viridiplantae,3GGHE@35493|Streptophyta	35493|Streptophyta	B	SWI SNF-related matrix-associated actin-dependent regulator of chromatin subfamily A containing DEAD H box	-	GO:0000018,GO:0000228,GO:0000729,GO:0000785,GO:0000792,GO:0003674,GO:0003676,GO:0003677,GO:0005488,GO:0005575,GO:0005622,GO:0005623,GO:0005634,GO:0005654,GO:0005657,GO:0005694,GO:0006139,GO:0006259,GO:0006281,GO:0006302,GO:0006325,GO:0006338,GO:0006355,GO:0006464,GO:0006476,GO:0006725,GO:0006753,GO:0006793,GO:0006796,GO:0006807,GO:0006950,GO:0006974,GO:0006996,GO:0007049,GO:0007059,GO:0008150,GO:…	3.6.4.12	ko:K14439	ko04550,map04550	-	-	-	ko00000,ko00001,ko01000,ko03036	-	-	-	Helicase_C,SNF2_N
file_1_file_2_19194_t	71139.XP_010043895.1	2.79e-78	257	KOG0389@1|root,KOG0389@2759|Eukaryota,37SNU@33090|Viridiplantae,3GGHE@35493|Streptophyta	35493|Streptophyta	B	SWI SNF-related matrix-associated actin-dependent regulator of chromatin subfamily A containing DEAD H box	-	GO:0000018,GO:0000228,GO:0000729,GO:0000785,GO:0000792,GO:0003674,GO:0003676,GO:0003677,GO:0005488,GO:0005575,GO:0005622,GO:0005623,GO:0005634,GO:0005654,GO:0005657,GO:0005694,GO:0006139,GO:0006259,GO:0006281,GO:0006302,GO:0006325,GO:0006338,GO:0006355,GO:0006464,GO:0006476,GO:0006725,GO:0006753,GO:0006793,GO:0006796,GO:0006807,GO:0006950,GO:0006974,GO:0006996,GO:0007049,GO:0007059,GO:0008150,GO:…	3.6.4.12	ko:K14439	ko04550,map04550	-	-	-	ko00000,ko00001,ko01000,ko03036	-	-	-	Helicase_C,SNF2_N
file_1_file_1_jg13670.t1	71139.XP_010043891.1	4.71e-294	809	2C11N@1|root,2QPTJ@2759|Eukaryota,37NPG@33090|Viridiplantae,3GBDW@35493|Streptophyta	35493|Streptophyta	K	transcription factor	-	GO:0000976,GO:0000981,GO:0001046,GO:0001047,GO:0001067,GO:0001228,GO:0003674,GO:0003676,GO:0003677,GO:0003690,GO:0003700,GO:0005488,GO:0005575,GO:0005622,GO:0005623,GO:0005634,GO:0006139,GO:0006351,GO:0006355,GO:0006357,GO:0006366,GO:0006725,GO:0006807,GO:0008150,GO:0008152,GO:0009058,GO:0009059,GO:0009889,GO:0009891,GO:0009893,GO:0009987,GO:0010467,GO:0010468,GO:0010556,GO:0010557,GO:0010604,GO:…	-	-	-	-	-	-	-	-	-	-	-
file_1_file_1_jg13671.t1	71139.XP_010043890.1	2.79e-220	616	KOG4197@1|root,KOG4197@2759|Eukaryota,37I4B@33090|Viridiplantae,3G7TP@35493|Streptophyta	35493|Streptophyta	S	Pentatricopeptide repeat-containing protein	-	-	-	ko:K17710	-	-	-	-	ko00000,ko03016,ko03029	-	-	-	-
file_1_file_2_19196_t	71139.XP_010043890.1	6.35e-167	476	KOG4197@1|root,KOG4197@2759|Eukaryota,37I4B@33090|Viridiplantae,3G7TP@35493|Streptophyta	35493|Streptophyta	S	Pentatricopeptide repeat-containing protein	-	-	-	ko:K17710	-	-	-	-	ko00000,ko03016,ko03029	-	-	-	-
file_1_file_1_jg13673.t1	71139.XP_010043888.1	7.49e-302	826	KOG1364@1|root,KOG1364@2759|Eukaryota,37PH3@33090|Viridiplantae,3G8MA@35493|Streptophyta	35493|Streptophyta	O	UBX domain-containing protein	-	GO:0003674,GO:0005488,GO:0005515,GO:0005575,GO:0005622,GO:0005623,GO:0005634,GO:0005737,GO:0006508,GO:0006511,GO:0006807,GO:0008150,GO:0008152,GO:0009056,GO:0009057,GO:0009987,GO:0010498,GO:0019538,GO:0019941,GO:0030163,GO:0030674,GO:0032182,GO:0043130,GO:0043161,GO:0043170,GO:0043226,GO:0043227,GO:0043229,GO:0043231,GO:0043632,GO:0044237,GO:0044238,GO:0044248,GO:0044257,GO:0044260,GO:0044265,GO:…	-	-	-	-	-	-	-	-	-	-	Thioredoxin_7,UBA_4,UBX
file_1_file_1_jg13674.t1	71139.XP_010043885.1	1.25e-82	247	COG1436@1|root,KOG3432@2759|Eukaryota,37TWE@33090|Viridiplantae,3GI8I@35493|Streptophyta	35493|Streptophyta	C	Subunit of the peripheral V1 complex of vacuolar ATPase essential for assembly or catalytic function. V-ATPase is responsible for acidifying a variety of intracellular compartments in eukaryotic cells	-	GO:0003674,GO:0003824,GO:0005215,GO:0005575,GO:0005622,GO:0005623,GO:0005737,GO:0005773,GO:0005774,GO:0005794,GO:0005886,GO:0006810,GO:0006811,GO:0008150,GO:0012505,GO:0015075,GO:0015399,GO:0015405,GO:0016020,GO:0016462,GO:0016787,GO:0016817,GO:0016818,GO:0016887,GO:0017111,GO:0022804,GO:0022853,GO:0022857,GO:0031090,GO:0034220,GO:0042623,GO:0042625,GO:0042626,GO:0043226,GO:0043227,GO:0043229,GO:…	-	ko:K02151	ko00190,ko01100,ko04145,ko04150,ko04721,ko04966,ko05110,ko05120,ko05323,map00190,map01100,map04145,map04150,map04721,map04966,map05110,map05120,map05323	M00160	-	-	ko00000,ko00001,ko00002	3.A.2.2	-	-	ATP-synt_F
file_1_file_1_jg13675.t1	71139.XP_010043884.1	3.43e-45	146	2CZ01@1|root,2S7HM@2759|Eukaryota,37WYZ@33090|Viridiplantae,3GKUV@35493|Streptophyta	35493|Streptophyta	T	Belongs to the DEFL family	-	GO:0005575,GO:0005618,GO:0005623,GO:0005886,GO:0006950,GO:0006952,GO:0008150,GO:0009505,GO:0016020,GO:0030312,GO:0044464,GO:0050896,GO:0071944	-	-	-	-	-	-	-	-	-	-	Gamma-thionin
file_1_file_1_jg13676.t1	71139.XP_010043884.1	3.87e-42	138	2CZ01@1|root,2S7HM@2759|Eukaryota,37WYZ@33090|Viridiplantae,3GKUV@35493|Streptophyta	35493|Streptophyta	T	Belongs to the DEFL family	-	GO:0005575,GO:0005618,GO:0005623,GO:0005886,GO:0006950,GO:0006952,GO:0008150,GO:0009505,GO:0016020,GO:0030312,GO:0044464,GO:0050896,GO:0071944	-	-	-	-	-	-	-	-	-	-	Gamma-thionin
file_1_file_1_jg13679.t1	71139.XP_010043883.1	1.26e-239	682	KOG4197@1|root,KOG4197@2759|Eukaryota,37IWW@33090|Viridiplantae,3G8SJ@35493|Streptophyta	35493|Streptophyta	S	Pentatricopeptide repeat-containing protein	-	GO:0003674,GO:0003676,GO:0003723,GO:0003824,GO:0004518,GO:0004519,GO:0005488,GO:0005575,GO:0005622,GO:0005623,GO:0006139,GO:0006725,GO:0006807,GO:0006996,GO:0008150,GO:0008152,GO:0009451,GO:0009657,GO:0009658,GO:0009987,GO:0016043,GO:0016070,GO:0016787,GO:0016788,GO:0034641,GO:0043170,GO:0043226,GO:0043227,GO:0043229,GO:0043231,GO:0043412,GO:0044237,GO:0044238,GO:0044424,GO:0044464,GO:0046483,GO:…	-	-	-	-	-	-	-	-	-	-	PPR,PPR_2
file_1_file_1_jg13680.t1	71139.XP_010043882.1	1.94e-135	395	28NUQ@1|root,2QVER@2759|Eukaryota,37R6M@33090|Viridiplantae,3GAEA@35493|Streptophyta	35493|Streptophyta	S	Tetratricopeptide repeat	-	GO:0005575,GO:0005622,GO:0005623,GO:0005737,GO:0006996,GO:0008150,GO:0009507,GO:0009526,GO:0009536,GO:0009657,GO:0009658,GO:0009941,GO:0009987,GO:0016043,GO:0031967,GO:0031975,GO:0043226,GO:0043227,GO:0043229,GO:0043231,GO:0044422,GO:0044424,GO:0044434,GO:0044435,GO:0044444,GO:0044446,GO:0044464,GO:0071840	-	-	-	-	-	-	-	-	-	-	TPR_16,TPR_19,TPR_6,TPR_8
file_1_file_1_jg13681.t1	71139.XP_010042803.1	1.06e-24	96.7	2E6J1@1|root,2SD8G@2759|Eukaryota,37XKZ@33090|Viridiplantae,3GMI3@35493|Streptophyta	35493|Streptophyta	-	-	-	-	-	-	-	-	-	-	-	-	-	-	-
file_1_file_1_jg13682.t1	71139.XP_010043881.1	0	1403	COG0270@1|root,2QW29@2759|Eukaryota,37K1J@33090|Viridiplantae,3G8WN@35493|Streptophyta	35493|Streptophyta	B	Belongs to the class I-like SAM-binding methyltransferase superfamily. C5-methyltransferase family	-	-	2.1.1.37	ko:K00558	ko00270,ko01100,ko05206,map00270,map01100,map05206	M00035	R04858	RC00003,RC00332	ko00000,ko00001,ko00002,ko01000,ko02048,ko03032,ko03036	-	-	-	BAH,Chromo,DNA_methylase
file_1_file_1_jg13683.t1	71139.XP_010043880.1	0	947	COG1161@1|root,KOG1249@2759|Eukaryota,37HS9@33090|Viridiplantae,3G7IX@35493|Streptophyta	35493|Streptophyta	S	P-loop containing nucleoside triphosphate hydrolases superfamily protein	-	GO:0003674,GO:0003824,GO:0003924,GO:0006275,GO:0008150,GO:0008156,GO:0009889,GO:0009890,GO:0009892,GO:0010556,GO:0010558,GO:0010605,GO:0016462,GO:0016787,GO:0016817,GO:0016818,GO:0017111,GO:0019219,GO:0019222,GO:0022613,GO:0030174,GO:0031323,GO:0031324,GO:0031326,GO:0031327,GO:0032297,GO:0042254,GO:0044085,GO:0045934,GO:0048519,GO:0048523,GO:0050789,GO:0050794,GO:0051052,GO:0051053,GO:0051171,GO:…	-	-	-	-	-	-	-	-	-	-	MMR_HSR1
file_1_file_1_jg13684.t1	3641.EOY19997	7.36e-175	493	KOG3002@1|root,KOG3002@2759|Eukaryota,37ITI@33090|Viridiplantae,3GERR@35493|Streptophyta	35493|Streptophyta	O	E3 ubiquitin-protein ligase that mediates ubiquitination and subsequent proteasomal degradation of target proteins. E3 ubiquitin ligases accept ubiquitin from an E2 ubiquitin- conjugating enzyme in the form of a thioester and then directly transfers the ubiquitin to targeted substrates	-	GO:0003674,GO:0003824,GO:0004842,GO:0005488,GO:0005515,GO:0005575,GO:0005622,GO:0005623,GO:0005634,GO:0005737,GO:0006464,GO:0006807,GO:0008150,GO:0008152,GO:0009894,GO:0009987,GO:0010506,GO:0016241,GO:0016567,GO:0016740,GO:0019222,GO:0019538,GO:0019787,GO:0031323,GO:0031329,GO:0032446,GO:0033043,GO:0036211,GO:0042802,GO:0042803,GO:0043170,GO:0043226,GO:0043227,GO:0043229,GO:0043231,GO:0043412,GO:…	2.3.2.27	ko:K04506	ko04013,ko04115,ko04120,ko04310,map04013,map04115,map04120,map04310	-	-	-	ko00000,ko00001,ko01000,ko04121	-	-	-	Sina
file_1_file_1_jg13686.t1	71139.XP_010043879.1	2.6e-41	138	2E0QT@1|root,2S84Q@2759|Eukaryota,37WP1@33090|Viridiplantae,3GKRV@35493|Streptophyta	35493|Streptophyta	-	-	-	-	-	-	-	-	-	-	-	-	-	-	-
file_1_file_1_jg13687.t1	71139.XP_010043878.1	0	1200	COG2759@1|root,2QSVW@2759|Eukaryota,37RBI@33090|Viridiplantae,3G7W8@35493|Streptophyta	35493|Streptophyta	F	formate-tetrahydrofolate	THFS	GO:0003674,GO:0003824,GO:0004329,GO:0004477,GO:0004488,GO:0005488,GO:0005507,GO:0005575,GO:0005576,GO:0005622,GO:0005623,GO:0005737,GO:0005829,GO:0005886,GO:0006082,GO:0006139,GO:0006144,GO:0006575,GO:0006725,GO:0006732,GO:0006760,GO:0006807,GO:0008150,GO:0008152,GO:0009058,GO:0009108,GO:0009112,GO:0009113,GO:0009256,GO:0009257,GO:0009396,GO:0009507,GO:0009536,GO:0009719,GO:0009725,GO:0009735,GO:…	6.3.4.3	ko:K01938	ko00670,ko00720,ko01100,ko01120,ko01200,map00670,map00720,map01100,map01120,map01200	M00140,M00377	R00943	RC00026,RC00111	ko00000,ko00001,ko00002,ko01000	-	-	-	FTHFS
file_1_file_1_jg13688.t1	71139.XP_010043876.1	2.19e-192	538	2C0PQ@1|root,2QQQJ@2759|Eukaryota,37PI1@33090|Viridiplantae,3GDNQ@35493|Streptophyta	35493|Streptophyta	Q	Belongs to the peroxidase family. Classical plant (class III) peroxidase subfamily	-	GO:0005575,GO:0005622,GO:0005623,GO:0005634,GO:0005737,GO:0043226,GO:0043227,GO:0043229,GO:0043231,GO:0044424,GO:0044464	1.11.1.7	ko:K00430	ko00940,ko01100,ko01110,map00940,map01100,map01110	-	R00602,R02596,R03919,R04007,R07443	RC00034	ko00000,ko00001,ko01000	-	-	-	peroxidase
file_1_file_1_jg13689.t1	3983.cassava4.1_024540m	2.66e-19	95.5	2A7Q5@1|root,2RYES@2759|Eukaryota,37U95@33090|Viridiplantae,3GHUR@35493|Streptophyta,4JP22@91835|fabids	35493|Streptophyta	S	C1 domain	-	-	-	-	-	-	-	-	-	-	-	-	C1_2
file_1_file_1_jg13691.t1	225117.XP_009354047.1	4.13e-78	253	28JMA@1|root,2S4JC@2759|Eukaryota,37W3E@33090|Viridiplantae,3GK64@35493|Streptophyta,4JQTC@91835|fabids	35493|Streptophyta	S	f-box protein	-	-	-	-	-	-	-	-	-	-	-	-	DUF295,F-box,F-box-like
file_1_file_1_jg13692.t1	71139.XP_010043875.1	4.43e-257	708	2CN7K@1|root,2QUCQ@2759|Eukaryota,37M35@33090|Viridiplantae,3GEF5@35493|Streptophyta	35493|Streptophyta	S	plastid-lipid-associated protein 12, chloroplastic	-	GO:0005575,GO:0005622,GO:0005623,GO:0005737,GO:0009507,GO:0009526,GO:0009534,GO:0009535,GO:0009536,GO:0009579,GO:0009941,GO:0016020,GO:0031967,GO:0031975,GO:0031976,GO:0031984,GO:0034357,GO:0042651,GO:0043226,GO:0043227,GO:0043229,GO:0043231,GO:0044422,GO:0044424,GO:0044434,GO:0044435,GO:0044436,GO:0044444,GO:0044446,GO:0044464,GO:0055035	-	-	-	-	-	-	-	-	-	-	PAP_fibrillin
file_1_file_2_19215_t	71139.XP_010043875.1	1.08e-252	698	2CN7K@1|root,2QUCQ@2759|Eukaryota,37M35@33090|Viridiplantae,3GEF5@35493|Streptophyta	35493|Streptophyta	S	plastid-lipid-associated protein 12, chloroplastic	-	GO:0005575,GO:0005622,GO:0005623,GO:0005737,GO:0009507,GO:0009526,GO:0009534,GO:0009535,GO:0009536,GO:0009579,GO:0009941,GO:0016020,GO:0031967,GO:0031975,GO:0031976,GO:0031984,GO:0034357,GO:0042651,GO:0043226,GO:0043227,GO:0043229,GO:0043231,GO:0044422,GO:0044424,GO:0044434,GO:0044435,GO:0044436,GO:0044444,GO:0044446,GO:0044464,GO:0055035	-	-	-	-	-	-	-	-	-	-	PAP_fibrillin
file_1_file_1_jg13693.t1	71139.XP_010043874.1	4.81e-234	658	28JTU@1|root,2QS7T@2759|Eukaryota,37NHK@33090|Viridiplantae,3GEVG@35493|Streptophyta	35493|Streptophyta	S	PRLI-interacting factor	-	-	-	-	-	-	-	-	-	-	-	-	-
file_1_file_1_jg13695.t1	71139.XP_010040492.1	6.42e-95	299	COG0515@1|root,2QQEW@2759|Eukaryota,37HW6@33090|Viridiplantae,3G7JQ@35493|Streptophyta	35493|Streptophyta	T	G-type lectin S-receptor-like serine threonine-protein kinase	-	GO:0003674,GO:0003824,GO:0004672,GO:0004674,GO:0005488,GO:0005515,GO:0005516,GO:0005575,GO:0005623,GO:0005886,GO:0006464,GO:0006468,GO:0006793,GO:0006796,GO:0006807,GO:0008150,GO:0008152,GO:0009987,GO:0016020,GO:0016301,GO:0016310,GO:0016740,GO:0016772,GO:0016773,GO:0019538,GO:0036211,GO:0043170,GO:0043412,GO:0044237,GO:0044238,GO:0044260,GO:0044267,GO:0044464,GO:0071704,GO:0071944,GO:0140096,GO:…	-	-	-	-	-	-	-	-	-	-	B_lectin,PAN_2,Pkinase,Pkinase_Tyr,S_locus_glycop
file_1_file_1_jg13696.t1	71139.XP_010042853.1	2.28e-75	236	COG0515@1|root,2QQEW@2759|Eukaryota,37HW6@33090|Viridiplantae,3G7JQ@35493|Streptophyta	35493|Streptophyta	T	G-type lectin S-receptor-like serine threonine-protein kinase	-	GO:0003674,GO:0003824,GO:0004672,GO:0004674,GO:0005488,GO:0005515,GO:0005516,GO:0005575,GO:0005623,GO:0005886,GO:0006464,GO:0006468,GO:0006793,GO:0006796,GO:0006807,GO:0008150,GO:0008152,GO:0009987,GO:0016020,GO:0016301,GO:0016310,GO:0016740,GO:0016772,GO:0016773,GO:0019538,GO:0036211,GO:0043170,GO:0043412,GO:0044237,GO:0044238,GO:0044260,GO:0044267,GO:0044464,GO:0071704,GO:0071944,GO:0140096,GO:…	-	-	-	-	-	-	-	-	-	-	B_lectin,PAN_2,Pkinase,Pkinase_Tyr,S_locus_glycop
file_1_file_1_jg13697.t1	71139.XP_010043872.1	0	1322	COG0515@1|root,2QQEW@2759|Eukaryota,37HW6@33090|Viridiplantae,3G7JQ@35493|Streptophyta	35493|Streptophyta	T	G-type lectin S-receptor-like serine threonine-protein kinase	-	GO:0003674,GO:0003824,GO:0004672,GO:0004674,GO:0005488,GO:0005515,GO:0005516,GO:0005575,GO:0005623,GO:0005886,GO:0006464,GO:0006468,GO:0006793,GO:0006796,GO:0006807,GO:0008150,GO:0008152,GO:0009987,GO:0016020,GO:0016301,GO:0016310,GO:0016740,GO:0016772,GO:0016773,GO:0019538,GO:0036211,GO:0043170,GO:0043412,GO:0044237,GO:0044238,GO:0044260,GO:0044267,GO:0044464,GO:0071704,GO:0071944,GO:0140096,GO:…	-	-	-	-	-	-	-	-	-	-	B_lectin,PAN_2,Pkinase,Pkinase_Tyr,S_locus_glycop
file_1_file_1_jg13698.t1	71139.XP_010043871.1	1.22e-19	88.2	COG0321@1|root,KOG0325@2759|Eukaryota,37I4U@33090|Viridiplantae,3GD2J@35493|Streptophyta	35493|Streptophyta	CH	Biotin/lipoate A/B protein ligase family	-	GO:0003674,GO:0003824,GO:0005575,GO:0005622,GO:0005623,GO:0005737,GO:0005739,GO:0006464,GO:0006807,GO:0008150,GO:0008152,GO:0009249,GO:0009987,GO:0010467,GO:0016740,GO:0016746,GO:0016747,GO:0018065,GO:0018193,GO:0018205,GO:0019538,GO:0033819,GO:0036211,GO:0043170,GO:0043226,GO:0043227,GO:0043229,GO:0043231,GO:0043412,GO:0044237,GO:0044238,GO:0044260,GO:0044267,GO:0044424,GO:0044444,GO:0044464,GO:…	2.3.1.181	ko:K03801	ko00785,ko01100,map00785,map01100	-	R07766,R07769	RC00039,RC00992,RC02867	ko00000,ko00001,ko01000	-	-	-	BPL_LplA_LipB
file_1_file_1_jg13699.t1	981085.XP_010087379.1	0	1289	COG0321@1|root,COG0397@1|root,KOG0325@2759|Eukaryota,KOG2542@2759|Eukaryota,37N0Z@33090|Viridiplantae,3GBP2@35493|Streptophyta,4JH2U@91835|fabids	35493|Streptophyta	H	Selenoprotein	-	-	-	-	-	-	-	-	-	-	-	-	UPF0061
file_1_file_1_jg13700.t1	71139.XP_010043867.1	8.58e-276	758	KOG4675@1|root,KOG4675@2759|Eukaryota,37PQA@33090|Viridiplantae,3G9Y2@35493|Streptophyta	35493|Streptophyta	H	emsy N terminus domain-containing protein ENT domain-containing protein	-	-	-	-	-	-	-	-	-	-	-	-	ENT,LBR_tudor
file_1_file_1_jg13700.t2	71139.XP_010043867.1	7.8e-270	743	KOG4675@1|root,KOG4675@2759|Eukaryota,37PQA@33090|Viridiplantae,3G9Y2@35493|Streptophyta	35493|Streptophyta	H	emsy N terminus domain-containing protein ENT domain-containing protein	-	-	-	-	-	-	-	-	-	-	-	-	ENT,LBR_tudor
file_1_file_2_19225_t	71139.XP_010043864.1	2.15e-69	213	2BE5M@1|root,2S141@2759|Eukaryota,37V05@33090|Viridiplantae,3GISX@35493|Streptophyta	35493|Streptophyta	S	mediator of RNA polymerase II transcription subunit	-	GO:0005575,GO:0005622,GO:0005623,GO:0005634,GO:0005654,GO:0016592,GO:0031974,GO:0031981,GO:0032991,GO:0043226,GO:0043227,GO:0043229,GO:0043231,GO:0043233,GO:0044422,GO:0044424,GO:0044428,GO:0044446,GO:0044451,GO:0044464,GO:0070013	-	ko:K15131	-	-	-	-	ko00000,ko03021	-	-	-	Med11
file_1_file_1_jg13704.t1	71139.XP_010043862.1	0	1824	COG5028@1|root,KOG1984@2759|Eukaryota,37PWE@33090|Viridiplantae,3GFBD@35493|Streptophyta	35493|Streptophyta	U	Protein transport protein Sec24-like	-	GO:0005575,GO:0005622,GO:0005623,GO:0005737,GO:0005829,GO:0006950,GO:0006979,GO:0008150,GO:0044424,GO:0044444,GO:0044464,GO:0050896	-	ko:K14007	ko04141,map04141	M00404	-	-	ko00000,ko00001,ko00002,ko04131	-	-	-	Gelsolin,Sec23_BS,Sec23_helical,Sec23_trunk,zf-Sec23_Sec24
file_1_file_1_jg13705.t1	71139.XP_010043861.1	2.29e-224	629	COG5125@1|root,KOG2866@2759|Eukaryota,37M2Q@33090|Viridiplantae,3GG6Q@35493|Streptophyta	35493|Streptophyta	S	Non-structural maintenance of chromosomes element 4 homolog	-	-	-	-	-	-	-	-	-	-	-	-	Nse4_C
file_1_file_1_jg13706.t1	71139.XP_010043857.1	1.54e-240	668	COG1028@1|root,KOG0725@2759|Eukaryota,37KEZ@33090|Viridiplantae,3GDCE@35493|Streptophyta	35493|Streptophyta	Q	Enoyl- acyl-carrier-protein reductase NADH	-	GO:0003674,GO:0003824,GO:0005488,GO:0005507,GO:0005575,GO:0005622,GO:0005623,GO:0005737,GO:0005829,GO:0005835,GO:0006082,GO:0006629,GO:0006631,GO:0006633,GO:0008150,GO:0008152,GO:0008610,GO:0009058,GO:0009507,GO:0009526,GO:0009532,GO:0009536,GO:0009570,GO:0009579,GO:0009941,GO:0009987,GO:0016053,GO:0016491,GO:0016627,GO:0016628,GO:0016631,GO:0019752,GO:0031967,GO:0031975,GO:0032787,GO:0032991,GO:…	1.3.1.10,1.3.1.9	ko:K00208	ko00061,ko00333,ko00780,ko01100,ko01130,ko01212,map00061,map00333,map00780,map01100,map01130,map01212	M00083,M00572	R01404,R04429,R04430,R04724,R04725,R04955,R04956,R04958,R04959,R04961,R04962,R04966,R04967,R04969,R04970,R07765,R10118,R10122,R11671	RC00052,RC00076,RC00120	ko00000,ko00001,ko00002,ko01000,ko01004	-	-	-	adh_short_C2
file_1_file_1_jg13707.t1	71139.XP_010043856.1	1.42e-192	536	COG5063@1|root,KOG1677@2759|Eukaryota,37KFV@33090|Viridiplantae,3GABU@35493|Streptophyta	35493|Streptophyta	S	Zinc finger CCCH domain-containing protein	-	-	-	-	-	-	-	-	-	-	-	-	KH_1,zf-CCCH,zf-CCCH_2
file_1_file_1_jg13708.t1	71139.XP_010046454.1	1.05e-194	556	COG3104@1|root,KOG1237@2759|Eukaryota,37JQT@33090|Viridiplantae,3G921@35493|Streptophyta	35493|Streptophyta	E	Protein NRT1 PTR FAMILY	-	-	-	ko:K14638	-	-	-	-	ko00000,ko02000	2.A.17.3	-	-	PTR2
file_1_file_1_jg13709.t1	71139.XP_010043855.1	2.95e-164	466	28NC2@1|root,2QUXG@2759|Eukaryota,37IDQ@33090|Viridiplantae,3GCZC@35493|Streptophyta	35493|Streptophyta	S	Putative small multi-drug export protein	-	-	-	-	-	-	-	-	-	-	-	-	Sm_multidrug_ex
file_1_file_2_19231_t	71139.XP_010043855.1	1.03e-163	466	28NC2@1|root,2QUXG@2759|Eukaryota,37IDQ@33090|Viridiplantae,3GCZC@35493|Streptophyta	35493|Streptophyta	S	Putative small multi-drug export protein	-	-	-	-	-	-	-	-	-	-	-	-	Sm_multidrug_ex
file_1_file_1_jg13710.t1	3885.XP_007162919.1	4.98e-48	153	KOG1780@1|root,KOG1780@2759|Eukaryota,37W4S@33090|Viridiplantae,3GK59@35493|Streptophyta,4JQGZ@91835|fabids	35493|Streptophyta	A	Small nuclear ribonucleoprotein	-	GO:0000375,GO:0000377,GO:0000398,GO:0003674,GO:0003676,GO:0003723,GO:0003729,GO:0005488,GO:0005575,GO:0005622,GO:0005623,GO:0005634,GO:0005681,GO:0005682,GO:0005684,GO:0005685,GO:0005686,GO:0005687,GO:0005689,GO:0005737,GO:0005829,GO:0006139,GO:0006396,GO:0006397,GO:0006725,GO:0006807,GO:0008150,GO:0008152,GO:0008380,GO:0009987,GO:0010467,GO:0016070,GO:0016071,GO:0030532,GO:0032991,GO:0034641,GO:…	-	ko:K11099	ko03040,map03040	M00351,M00352,M00354,M00355,M00398	-	-	ko00000,ko00001,ko00002,ko03032,ko03041	-	-	-	LSM
file_1_file_1_jg13711.t1	71139.XP_010043853.1	1.13e-215	607	2CM92@1|root,2QPNI@2759|Eukaryota,37IAX@33090|Viridiplantae,3GDS6@35493|Streptophyta	35493|Streptophyta	-	-	-	-	-	-	-	-	-	-	-	-	-	-	DUF1618
file_1_file_2_19233_t	71139.XP_010043853.1	6.82e-80	252	2CM92@1|root,2QPNI@2759|Eukaryota,37IAX@33090|Viridiplantae,3GDS6@35493|Streptophyta	35493|Streptophyta	-	-	-	-	-	-	-	-	-	-	-	-	-	-	DUF1618
file_1_file_1_jg13712.t1	71139.XP_010043851.1	2.39e-74	226	COG0526@1|root,KOG0907@2759|Eukaryota,37VIK@33090|Viridiplantae,3GJVP@35493|Streptophyta	35493|Streptophyta	O	Belongs to the thioredoxin family	-	GO:0003674,GO:0003824,GO:0004791,GO:0005575,GO:0005622,GO:0005623,GO:0005737,GO:0005739,GO:0005829,GO:0005886,GO:0006950,GO:0006979,GO:0008150,GO:0008152,GO:0009636,GO:0009987,GO:0015035,GO:0015036,GO:0016020,GO:0016209,GO:0016491,GO:0016651,GO:0016667,GO:0016668,GO:0016671,GO:0019725,GO:0033554,GO:0034599,GO:0042221,GO:0042592,GO:0043226,GO:0043227,GO:0043229,GO:0043231,GO:0044424,GO:0044444,GO:…	-	ko:K03671	ko04621,ko05418,map04621,map05418	-	-	-	ko00000,ko00001,ko03110	-	-	-	Thioredoxin
file_1_file_1_jg13713.t1	71139.XP_010043850.1	1.2e-299	826	28JST@1|root,2QS6K@2759|Eukaryota,37HUJ@33090|Viridiplantae,3GAQA@35493|Streptophyta	35493|Streptophyta	S	BEST Arabidopsis thaliana protein match is	-	-	-	-	-	-	-	-	-	-	-	-	DUF569
file_1_file_2_19235_t	71139.XP_010043850.1	1.23e-296	818	28JST@1|root,2QS6K@2759|Eukaryota,37HUJ@33090|Viridiplantae,3GAQA@35493|Streptophyta	35493|Streptophyta	S	BEST Arabidopsis thaliana protein match is	-	-	-	-	-	-	-	-	-	-	-	-	DUF569
file_1_file_1_jg13714.t1	71139.XP_010043849.1	8.28e-155	436	KOG0406@1|root,KOG0406@2759|Eukaryota,37P8V@33090|Viridiplantae,3GBW7@35493|Streptophyta	35493|Streptophyta	O	glutathione s-transferase	-	GO:0003674,GO:0003824,GO:0004364,GO:0005575,GO:0005622,GO:0005623,GO:0005737,GO:0006518,GO:0006575,GO:0006749,GO:0006790,GO:0006807,GO:0006950,GO:0006970,GO:0007275,GO:0008150,GO:0008152,GO:0009056,GO:0009314,GO:0009404,GO:0009407,GO:0009416,GO:0009507,GO:0009536,GO:0009628,GO:0009636,GO:0009639,GO:0009640,GO:0009651,GO:0009704,GO:0009719,GO:0009725,GO:0009791,GO:0009987,GO:0010033,GO:0010243,GO:…	2.5.1.18	ko:K00799	ko00480,ko00980,ko00982,ko00983,ko01524,ko05200,ko05204,ko05225,ko05418,map00480,map00980,map00982,map00983,map01524,map05200,map05204,map05225,map05418	-	R03522,R07002,R07003,R07004,R07023,R07024,R07025,R07026,R07069,R07070,R07083,R07084,R07091,R07092,R07093,R07094,R07100,R07113,R07116,R08280,R09409,R11905	RC00004,RC00069,RC00840,RC00948,RC01704,RC01705,RC01706,RC01758,RC01759,RC01765,RC01767,RC01769,RC02243,RC02527,RC02939,RC02940,RC02942,RC02943,RC02944	ko00000,ko00001,ko01000,ko02000	1.A.12.2.2,1.A.12.3.2	-	-	GST_C,GST_C_2,GST_N,GST_N_3
file_1_file_1_jg13715.t1	71139.XP_010043848.1	5.4e-87	283	COG4886@1|root,KOG0619@2759|Eukaryota,37NRK@33090|Viridiplantae,3GCAJ@35493|Streptophyta	35493|Streptophyta	S	LRR receptor-like serine threonine-protein kinase	-	GO:0003674,GO:0003824,GO:0004672,GO:0004674,GO:0004675,GO:0004888,GO:0005575,GO:0005622,GO:0005623,GO:0005737,GO:0005768,GO:0005886,GO:0006464,GO:0006468,GO:0006793,GO:0006796,GO:0006807,GO:0006810,GO:0006897,GO:0006898,GO:0006950,GO:0006952,GO:0007154,GO:0007165,GO:0007166,GO:0007167,GO:0007178,GO:0008150,GO:0008152,GO:0009595,GO:0009605,GO:0009607,GO:0009617,GO:0009987,GO:0010359,GO:0012505,GO:…	-	-	-	-	-	-	-	-	-	-	LRRNT_2,LRR_1,LRR_4,LRR_6,LRR_8
file_1_file_1_jg13716.t1	71139.XP_010043848.1	3.35e-66	223	COG4886@1|root,KOG0619@2759|Eukaryota,37NRK@33090|Viridiplantae,3GCAJ@35493|Streptophyta	35493|Streptophyta	S	LRR receptor-like serine threonine-protein kinase	-	GO:0003674,GO:0003824,GO:0004672,GO:0004674,GO:0004675,GO:0004888,GO:0005575,GO:0005622,GO:0005623,GO:0005737,GO:0005768,GO:0005886,GO:0006464,GO:0006468,GO:0006793,GO:0006796,GO:0006807,GO:0006810,GO:0006897,GO:0006898,GO:0006950,GO:0006952,GO:0007154,GO:0007165,GO:0007166,GO:0007167,GO:0007178,GO:0008150,GO:0008152,GO:0009595,GO:0009605,GO:0009607,GO:0009617,GO:0009987,GO:0010359,GO:0012505,GO:…	-	-	-	-	-	-	-	-	-	-	LRRNT_2,LRR_1,LRR_4,LRR_6,LRR_8
file_1_file_1_jg13717.t1	71139.XP_010043847.1	1.58e-90	271	2B481@1|root,2S0GF@2759|Eukaryota,37UJM@33090|Viridiplantae,3GIZX@35493|Streptophyta	35493|Streptophyta	S	Short hypocotyl in white light1	-	GO:0005575,GO:0005622,GO:0005623,GO:0005634,GO:0008150,GO:0009314,GO:0009416,GO:0009605,GO:0009606,GO:0009628,GO:0009629,GO:0009630,GO:0009642,GO:0009787,GO:0009889,GO:0009958,GO:0009962,GO:0009966,GO:0010099,GO:0010100,GO:0010380,GO:0010646,GO:0019222,GO:0023051,GO:0031323,GO:0031326,GO:0031537,GO:0031540,GO:0043226,GO:0043227,GO:0043229,GO:0043231,GO:0044424,GO:0044464,GO:0048518,GO:0048519,GO:…	-	-	-	-	-	-	-	-	-	-	-
file_1_file_1_jg13718.t1	71139.XP_010043844.1	0	1639	28I92@1|root,2QQJE@2759|Eukaryota,37M5G@33090|Viridiplantae,3GG0S@35493|Streptophyta	35493|Streptophyta	S	TMV resistance protein N-like	-	-	-	-	-	-	-	-	-	-	-	-	LRR_8,NB-ARC,TIR
file_1_file_1_jg13720.t1	3988.XP_002520185.1	8.14e-16	73.9	2E11B@1|root,2S8E1@2759|Eukaryota,37X4N@33090|Viridiplantae,3GM4I@35493|Streptophyta,4JQW0@91835|fabids	35493|Streptophyta	S	CLAVATA3 ESR (CLE)-related protein	-	-	-	-	-	-	-	-	-	-	-	-	-
file_1_file_1_jg13721.t1	71139.XP_010044680.1	1.1e-234	644	COG0639@1|root,KOG0371@2759|Eukaryota,37JWZ@33090|Viridiplantae,3G904@35493|Streptophyta	35493|Streptophyta	T	serine threonine-protein phosphatase	PP2A-2	GO:0003674,GO:0003824,GO:0004721,GO:0004722,GO:0005575,GO:0005622,GO:0005623,GO:0005634,GO:0005737,GO:0005777,GO:0005829,GO:0005886,GO:0006464,GO:0006470,GO:0006793,GO:0006796,GO:0006807,GO:0006996,GO:0008104,GO:0008150,GO:0008152,GO:0009657,GO:0009658,GO:0009787,GO:0009788,GO:0009893,GO:0009894,GO:0009896,GO:0009902,GO:0009903,GO:0009966,GO:0009968,GO:0009987,GO:0010565,GO:0010646,GO:0010648,GO:…	3.1.3.16	ko:K04382	ko03015,ko04013,ko04071,ko04111,ko04113,ko04114,ko04136,ko04138,ko04140,ko04151,ko04152,ko04261,ko04350,ko04390,ko04391,ko04530,ko04728,ko04730,ko05142,ko05160,ko05165,map03015,map04013,map04071,map04111,map04113,map04114,map04136,map04138,map04140,map04151,map04152,map04261,map04350,map04390,map04391,map04530,map04728,map04730,map05142,map05160,map05165	-	-	-	ko00000,ko00001,ko01000,ko01009,ko03036,ko04147	-	-	-	Metallophos
file_1_file_1_jg13722.t1	102107.XP_008235032.1	1.72e-34	134	KOG4197@1|root,KOG4197@2759|Eukaryota,37QP8@33090|Viridiplantae,3G8JN@35493|Streptophyta,4JM3B@91835|fabids	35493|Streptophyta	S	Pentatricopeptide repeat-containing protein	-	-	3.5.1.49	ko:K01455	ko00460,ko00630,ko00910,ko01200,map00460,map00630,map00910,map01200	-	R00524	RC02432,RC02810	ko00000,ko00001,ko01000	-	-	-	PPR,PPR_2,PPR_3
file_1_file_1_jg13723.t1	71139.XP_010043841.1	9.55e-308	854	COG0515@1|root,2QRP1@2759|Eukaryota,37RK9@33090|Viridiplantae,3GB4W@35493|Streptophyta	35493|Streptophyta	T	Inactive receptor kinase	-	GO:0005575,GO:0005622,GO:0005623,GO:0005634,GO:0005886,GO:0016020,GO:0043226,GO:0043227,GO:0043229,GO:0043231,GO:0044424,GO:0044464,GO:0071944	-	-	-	-	-	-	-	-	-	-	LRRNT_2,LRR_1,LRR_6,LRR_8,Pkinase_Tyr
file_1_file_1_jg13724.t1	71139.XP_010043839.1	2.94e-155	441	2CMCR@1|root,2QPZA@2759|Eukaryota,37JER@33090|Viridiplantae,3GFPR@35493|Streptophyta	35493|Streptophyta	K	Transcription factor	-	-	-	-	-	-	-	-	-	-	-	-	Myb_DNA-binding
file_1_file_1_jg13727.t1	71139.XP_010043838.1	4.95e-245	676	2BYJN@1|root,2QTUK@2759|Eukaryota,37IGC@33090|Viridiplantae,3GEXD@35493|Streptophyta	35493|Streptophyta	G	Belongs to the glycosyltransferase 8 family	-	GO:0000271,GO:0003674,GO:0003824,GO:0005575,GO:0005622,GO:0005623,GO:0005737,GO:0005794,GO:0005975,GO:0005976,GO:0008150,GO:0008152,GO:0008194,GO:0009058,GO:0009059,GO:0012505,GO:0016051,GO:0016740,GO:0016757,GO:0016758,GO:0043170,GO:0043226,GO:0043227,GO:0043229,GO:0043231,GO:0044238,GO:0044424,GO:0044444,GO:0044464,GO:0047262,GO:0071704,GO:1901576	-	-	-	-	-	-	-	-	-	-	Glyco_transf_8
file_1_file_1_jg13728.t1	71139.XP_010043834.1	2.28e-235	667	28ME6@1|root,2QTXN@2759|Eukaryota,37SZY@33090|Viridiplantae,3G7AW@35493|Streptophyta	35493|Streptophyta	-	-	-	-	-	-	-	-	-	-	-	-	-	-	TPX2
file_1_file_1_jg13729.t1	71139.XP_010043833.1	0	1043	KOG1922@1|root,KOG1922@2759|Eukaryota,37ISN@33090|Viridiplantae,3GEXN@35493|Streptophyta	35493|Streptophyta	TZ	Belongs to the formin-like family	-	GO:0000902,GO:0003674,GO:0003779,GO:0005488,GO:0005515,GO:0005522,GO:0005575,GO:0005623,GO:0005886,GO:0005911,GO:0006996,GO:0007010,GO:0007015,GO:0008064,GO:0008092,GO:0008150,GO:0009653,GO:0009826,GO:0009932,GO:0009987,GO:0010638,GO:0016020,GO:0016043,GO:0016049,GO:0030029,GO:0030036,GO:0030054,GO:0030832,GO:0030833,GO:0030838,GO:0031334,GO:0032271,GO:0032273,GO:0032502,GO:0032535,GO:0032956,GO:…	-	-	-	-	-	-	-	-	-	-	FH2
file_1_file_1_jg13730.t1	71139.XP_010043832.1	1.59e-93	281	COG5641@1|root,KOG1601@2759|Eukaryota,37TVR@33090|Viridiplantae,3GAFH@35493|Streptophyta	35493|Streptophyta	K	two-component response regulator	-	-	-	ko:K14492	ko04075,map04075	-	-	-	ko00000,ko00001	-	-	-	Response_reg
file_1_file_2_19254_t	71139.XP_010043832.1	3.25e-99	296	COG5641@1|root,KOG1601@2759|Eukaryota,37TVR@33090|Viridiplantae,3GAFH@35493|Streptophyta	35493|Streptophyta	K	two-component response regulator	-	-	-	ko:K14492	ko04075,map04075	-	-	-	ko00000,ko00001	-	-	-	Response_reg
file_1_file_1_jg13731.t1	71139.XP_010043828.1	9.1e-248	683	28KXY@1|root,2QTEK@2759|Eukaryota,37PBU@33090|Viridiplantae,3G8T9@35493|Streptophyta	35493|Streptophyta	S	Zinc finger MYND domain-containing protein	-	GO:0000003,GO:0003006,GO:0003674,GO:0005488,GO:0005515,GO:0005575,GO:0005622,GO:0005623,GO:0005634,GO:0005737,GO:0006355,GO:0007276,GO:0007281,GO:0007283,GO:0007286,GO:0008150,GO:0009889,GO:0009890,GO:0009892,GO:0009987,GO:0010468,GO:0010556,GO:0010558,GO:0010605,GO:0010629,GO:0019219,GO:0019222,GO:0019899,GO:0019953,GO:0022412,GO:0022414,GO:0030154,GO:0031323,GO:0031324,GO:0031326,GO:0031327,GO:…	-	-	-	-	-	-	-	-	-	-	zf-MYND
file_1_file_2_19256_t	71139.XP_010043828.1	5.26e-139	400	28KXY@1|root,2QTEK@2759|Eukaryota,37PBU@33090|Viridiplantae,3G8T9@35493|Streptophyta	35493|Streptophyta	S	Zinc finger MYND domain-containing protein	-	GO:0000003,GO:0003006,GO:0003674,GO:0005488,GO:0005515,GO:0005575,GO:0005622,GO:0005623,GO:0005634,GO:0005737,GO:0006355,GO:0007276,GO:0007281,GO:0007283,GO:0007286,GO:0008150,GO:0009889,GO:0009890,GO:0009892,GO:0009987,GO:0010468,GO:0010556,GO:0010558,GO:0010605,GO:0010629,GO:0019219,GO:0019222,GO:0019899,GO:0019953,GO:0022412,GO:0022414,GO:0030154,GO:0031323,GO:0031324,GO:0031326,GO:0031327,GO:…	-	-	-	-	-	-	-	-	-	-	zf-MYND
file_1_file_1_jg13732.t1	71139.XP_010043827.1	0	1022	28HIU@1|root,2QPWP@2759|Eukaryota,37I7X@33090|Viridiplantae,3G96S@35493|Streptophyta	35493|Streptophyta	-	-	-	-	-	-	-	-	-	-	-	-	-	-	-
file_1_file_2_19259_t	71139.XP_010046452.1	1.06e-216	600	COG0656@1|root,KOG1577@2759|Eukaryota,37SJV@33090|Viridiplantae,3GATM@35493|Streptophyta	35493|Streptophyta	S	Non-functional NADPH-dependent codeinone reductase 2-like	-	-	1.1.1.285	ko:K22374	-	-	-	-	ko00000,ko01000	-	-	-	Aldo_ket_red
file_1_file_1_jg13733.t1	71139.XP_010046452.1	9.47e-225	625	COG0656@1|root,KOG1577@2759|Eukaryota,37SJV@33090|Viridiplantae,3GATM@35493|Streptophyta	35493|Streptophyta	S	Non-functional NADPH-dependent codeinone reductase 2-like	-	-	1.1.1.285	ko:K22374	-	-	-	-	ko00000,ko01000	-	-	-	Aldo_ket_red
file_1_file_1_jg13734.t1	71139.XP_010043826.1	3.74e-219	606	COG0656@1|root,KOG1577@2759|Eukaryota,37SJV@33090|Viridiplantae,3GATM@35493|Streptophyta	35493|Streptophyta	S	Non-functional NADPH-dependent codeinone reductase 2-like	-	-	1.1.1.285	ko:K22374	-	-	-	-	ko00000,ko01000	-	-	-	Aldo_ket_red
file_1_file_2_19262_t	71139.XP_010046451.1	3.68e-220	616	KOG4155@1|root,KOG4155@2759|Eukaryota,37KM0@33090|Viridiplantae,3GF9F@35493|Streptophyta	35493|Streptophyta	S	Vegetative incompatibility protein	-	-	-	ko:K14963	ko04934,map04934	-	-	-	ko00000,ko00001,ko03036	-	-	-	WD40
file_1_file_1_jg13736.t1	71139.XP_010046451.1	4.93e-212	598	KOG4155@1|root,KOG4155@2759|Eukaryota,37KM0@33090|Viridiplantae,3GF9F@35493|Streptophyta	35493|Streptophyta	S	Vegetative incompatibility protein	-	-	-	ko:K14963	ko04934,map04934	-	-	-	ko00000,ko00001,ko03036	-	-	-	WD40
file_1_file_1_jg13737.t1	71139.XP_010053586.1	5.66e-86	275	COG2124@1|root,KOG0157@2759|Eukaryota,37Z8T@33090|Viridiplantae,3GCFI@35493|Streptophyta	35493|Streptophyta	Q	Belongs to the cytochrome P450 family	-	-	1.14.13.79	ko:K04123	ko00904,ko01100,ko01110,map00904,map01100,map01110	-	R06294,R06295,R06296,R06297,R10067	RC00613,RC01218,RC01453,RC01622,RC03041	ko00000,ko00001,ko00199,ko01000	-	-	-	p450
file_1_file_1_jg13739.t1	71139.XP_010043825.1	7.21e-162	462	KOG4374@1|root,KOG4374@2759|Eukaryota,37MDM@33090|Viridiplantae,3GCC6@35493|Streptophyta	35493|Streptophyta	A	Sterile alpha motif (SAM) domain-containing protein	-	-	-	-	-	-	-	-	-	-	-	-	SAM_1
file_1_file_1_jg13740.t1	71139.XP_010043824.1	2.62e-150	427	2C40P@1|root,2RPI7@2759|Eukaryota,37HF0@33090|Viridiplantae,3GGKF@35493|Streptophyta	35493|Streptophyta	S	ZINC FINGER protein	-	GO:0000902,GO:0000904,GO:0001067,GO:0001101,GO:0003674,GO:0003676,GO:0003677,GO:0003700,GO:0005488,GO:0006355,GO:0007154,GO:0007165,GO:0007275,GO:0008150,GO:0009653,GO:0009719,GO:0009725,GO:0009735,GO:0009736,GO:0009739,GO:0009740,GO:0009755,GO:0009888,GO:0009889,GO:0009987,GO:0010015,GO:0010026,GO:0010033,GO:0010053,GO:0010054,GO:0010468,GO:0010476,GO:0010556,GO:0016043,GO:0016049,GO:0019219,GO:…	-	-	-	-	-	-	-	-	-	-	zf-C2H2_6
file_1_file_1_jg13742.t1	71139.XP_010043823.1	5.16e-73	232	KOG1192@1|root,KOG1192@2759|Eukaryota,37IVJ@33090|Viridiplantae,3G9WC@35493|Streptophyta	35493|Streptophyta	CG	Belongs to the UDP-glycosyltransferase family	UGT74B1	GO:0003674,GO:0003824,GO:0005575,GO:0005622,GO:0005623,GO:0005737,GO:0005829,GO:0006082,GO:0006520,GO:0006725,GO:0006790,GO:0006807,GO:0006950,GO:0006952,GO:0008150,GO:0008152,GO:0008194,GO:0009058,GO:0009072,GO:0009605,GO:0009607,GO:0009617,GO:0009696,GO:0009987,GO:0010029,GO:0010030,GO:0010817,GO:0016043,GO:0016143,GO:0016144,GO:0016740,GO:0016757,GO:0016758,GO:0016999,GO:0017144,GO:0018874,GO:…	2.4.1.195	ko:K11820,ko:K13691	ko00380,ko00966,ko01110,ko01210,map00380,map00966,map01110,map01210	M00370	R03213,R08164,R08668	RC00005,RC00882	ko00000,ko00001,ko00002,ko01000,ko01003	-	GT1	-	UDPGT
file_1_file_1_jg13744.t1	71139.XP_010043823.1	3.96e-285	785	KOG1192@1|root,KOG1192@2759|Eukaryota,37IVJ@33090|Viridiplantae,3G9WC@35493|Streptophyta	35493|Streptophyta	CG	Belongs to the UDP-glycosyltransferase family	UGT74B1	GO:0003674,GO:0003824,GO:0005575,GO:0005622,GO:0005623,GO:0005737,GO:0005829,GO:0006082,GO:0006520,GO:0006725,GO:0006790,GO:0006807,GO:0006950,GO:0006952,GO:0008150,GO:0008152,GO:0008194,GO:0009058,GO:0009072,GO:0009605,GO:0009607,GO:0009617,GO:0009696,GO:0009987,GO:0010029,GO:0010030,GO:0010817,GO:0016043,GO:0016143,GO:0016144,GO:0016740,GO:0016757,GO:0016758,GO:0016999,GO:0017144,GO:0018874,GO:…	2.4.1.195	ko:K11820,ko:K13691	ko00380,ko00966,ko01110,ko01210,map00380,map00966,map01110,map01210	M00370	R03213,R08164,R08668	RC00005,RC00882	ko00000,ko00001,ko00002,ko01000,ko01003	-	GT1	-	UDPGT
file_1_file_1_jg13745.t1	71139.XP_010057149.1	3.21e-13	72	COG0494@1|root,KOG4313@2759|Eukaryota,37MQ3@33090|Viridiplantae,3GDAA@35493|Streptophyta	35493|Streptophyta	F	Nudix hydrolase 20	-	GO:0003674,GO:0003824,GO:0005575,GO:0005622,GO:0005623,GO:0005737,GO:0009507,GO:0009536,GO:0016462,GO:0016787,GO:0016817,GO:0016818,GO:0017110,GO:0043226,GO:0043227,GO:0043229,GO:0043231,GO:0044424,GO:0044444,GO:0044464,GO:0044715	-	-	-	-	-	-	-	-	-	-	DUF4743,NUDIX
file_1_file_1_jg13746.t1	71139.XP_010043822.1	2.22e-28	112	KOG1565@1|root,KOG1565@2759|Eukaryota,37MGX@33090|Viridiplantae,3GE77@35493|Streptophyta	35493|Streptophyta	O	Belongs to the peptidase M10A family	-	GO:0001101,GO:0003674,GO:0003824,GO:0004175,GO:0004222,GO:0005575,GO:0005623,GO:0005886,GO:0006508,GO:0006807,GO:0006950,GO:0006970,GO:0008150,GO:0008152,GO:0008233,GO:0008237,GO:0009628,GO:0009651,GO:0009719,GO:0009725,GO:0009753,GO:0010033,GO:0010035,GO:0010038,GO:0016020,GO:0016787,GO:0019538,GO:0031224,GO:0031225,GO:0032502,GO:0040007,GO:0042221,GO:0043170,GO:0044238,GO:0044425,GO:0044464,GO:…	-	ko:K07761,ko:K07999	-	-	-	-	ko00000,ko01000,ko01002	-	-	-	PG_binding_1,Peptidase_M10
file_1_file_1_jg13746.t2	71139.XP_010043822.1	1.17e-224	629	KOG1565@1|root,KOG1565@2759|Eukaryota,37MGX@33090|Viridiplantae,3GE77@35493|Streptophyta	35493|Streptophyta	O	Belongs to the peptidase M10A family	-	GO:0001101,GO:0003674,GO:0003824,GO:0004175,GO:0004222,GO:0005575,GO:0005623,GO:0005886,GO:0006508,GO:0006807,GO:0006950,GO:0006970,GO:0008150,GO:0008152,GO:0008233,GO:0008237,GO:0009628,GO:0009651,GO:0009719,GO:0009725,GO:0009753,GO:0010033,GO:0010035,GO:0010038,GO:0016020,GO:0016787,GO:0019538,GO:0031224,GO:0031225,GO:0032502,GO:0040007,GO:0042221,GO:0043170,GO:0044238,GO:0044425,GO:0044464,GO:…	-	ko:K07761,ko:K07999	-	-	-	-	ko00000,ko01000,ko01002	-	-	-	PG_binding_1,Peptidase_M10
file_1_file_1_jg13747.t1	71139.XP_010043820.1	0	897	COG1796@1|root,KOG2534@2759|Eukaryota,37KPK@33090|Viridiplantae,3GFR8@35493|Streptophyta	35493|Streptophyta	L	DNA polymerase	-	GO:0000724,GO:0000725,GO:0000726,GO:0003674,GO:0003824,GO:0003887,GO:0005488,GO:0006139,GO:0006259,GO:0006281,GO:0006284,GO:0006285,GO:0006287,GO:0006289,GO:0006302,GO:0006303,GO:0006310,GO:0006725,GO:0006807,GO:0006950,GO:0006974,GO:0008150,GO:0008152,GO:0009058,GO:0009059,GO:0009314,GO:0009411,GO:0009416,GO:0009628,GO:0009987,GO:0010224,GO:0016740,GO:0016772,GO:0016779,GO:0016829,GO:0016835,GO:…	2.7.7.7	ko:K03512	ko03410,ko03450,map03410,map03450	M00296	-	-	ko00000,ko00001,ko00002,ko01000,ko03400	-	-	-	BRCT,DNA_pol_B_palm,DNA_pol_B_thumb,DNA_pol_lambd_f,HHH_8,LIM
file_1_file_1_jg13748.t1	71139.XP_010043819.1	3.25e-91	271	2C0F9@1|root,2S2MJ@2759|Eukaryota,37VRN@33090|Viridiplantae,3GIMF@35493|Streptophyta	35493|Streptophyta	S	response to light intensity	PRIN2	GO:0000427,GO:0000428,GO:0003674,GO:0003676,GO:0003677,GO:0005488,GO:0005575,GO:0005622,GO:0005623,GO:0005737,GO:0008150,GO:0009295,GO:0009314,GO:0009416,GO:0009507,GO:0009532,GO:0009536,GO:0009570,GO:0009628,GO:0009642,GO:0010468,GO:0019222,GO:0030880,GO:0032991,GO:0042644,GO:0042646,GO:0043226,GO:0043227,GO:0043228,GO:0043229,GO:0043231,GO:0043232,GO:0044422,GO:0044424,GO:0044434,GO:0044435,GO:…	-	-	-	-	-	-	-	-	-	-	-
file_1_file_2_19275_t	71139.XP_010043819.1	2.87e-82	250	2C0F9@1|root,2S2MJ@2759|Eukaryota,37VRN@33090|Viridiplantae,3GIMF@35493|Streptophyta	35493|Streptophyta	S	response to light intensity	PRIN2	GO:0000427,GO:0000428,GO:0003674,GO:0003676,GO:0003677,GO:0005488,GO:0005575,GO:0005622,GO:0005623,GO:0005737,GO:0008150,GO:0009295,GO:0009314,GO:0009416,GO:0009507,GO:0009532,GO:0009536,GO:0009570,GO:0009628,GO:0009642,GO:0010468,GO:0019222,GO:0030880,GO:0032991,GO:0042644,GO:0042646,GO:0043226,GO:0043227,GO:0043228,GO:0043229,GO:0043231,GO:0043232,GO:0044422,GO:0044424,GO:0044434,GO:0044435,GO:…	-	-	-	-	-	-	-	-	-	-	-
file_1_file_1_jg13749.t1	71139.XP_010043818.1	8.97e-112	326	COG3011@1|root,2RY65@2759|Eukaryota,37TUJ@33090|Viridiplantae,3GIFF@35493|Streptophyta	35493|Streptophyta	S	DCC family protein At1g52590	-	-	-	-	-	-	-	-	-	-	-	-	DUF393
file_1_file_1_jg13751.t1	71139.XP_010046450.1	3.06e-223	623	COG0328@1|root,2QRR5@2759|Eukaryota,37QNM@33090|Viridiplantae,3G9CP@35493|Streptophyta	35493|Streptophyta	L	RNase H	-	-	-	-	-	-	-	-	-	-	-	-	Cauli_VI,DUF393,RVT_3
file_1_file_2_19278_t	71139.XP_010043816.1	1.25e-131	388	28HIJ@1|root,2QPWD@2759|Eukaryota,37P0W@33090|Viridiplantae,3GFJA@35493|Streptophyta	35493|Streptophyta	-	-	-	-	-	-	-	-	-	-	-	-	-	-	RRM_1
file_1_file_1_jg13752.t1	71139.XP_010043816.1	8.66e-216	609	28HIJ@1|root,2QPWD@2759|Eukaryota,37P0W@33090|Viridiplantae,3GFJA@35493|Streptophyta	35493|Streptophyta	-	-	-	-	-	-	-	-	-	-	-	-	-	-	RRM_1
file_1_file_1_jg13753.t1	71139.XP_010043815.1	8.03e-196	552	KOG0656@1|root,KOG0656@2759|Eukaryota,37KH9@33090|Viridiplantae,3G83T@35493|Streptophyta	35493|Streptophyta	D	Belongs to the cyclin family	-	-	-	ko:K18810	-	M00692	-	-	ko00000,ko00002	-	-	-	Cyclin_C,Cyclin_N
file_1_file_1_jg13753.t2	71139.XP_010043815.1	2.98e-193	546	KOG0656@1|root,KOG0656@2759|Eukaryota,37KH9@33090|Viridiplantae,3G83T@35493|Streptophyta	35493|Streptophyta	D	Belongs to the cyclin family	-	-	-	ko:K18810	-	M00692	-	-	ko00000,ko00002	-	-	-	Cyclin_C,Cyclin_N
file_1_file_1_jg13754.t1	71139.XP_010043814.1	1.13e-95	281	2CXIQ@1|root,2RXVQ@2759|Eukaryota,37TSF@33090|Viridiplantae,3GIBK@35493|Streptophyta	35493|Streptophyta	S	Domain of unknown function (DUF4228)	-	-	-	-	-	-	-	-	-	-	-	-	DUF4228
file_1_file_1_jg13755.t1	71139.XP_010043812.1	0	977	COG2233@1|root,KOG1292@2759|Eukaryota,37NPT@33090|Viridiplantae,3G7TA@35493|Streptophyta	35493|Streptophyta	F	nucleobase-ascorbate transporter	-	GO:0005575,GO:0005618,GO:0005622,GO:0005623,GO:0005737,GO:0005773,GO:0005783,GO:0005886,GO:0005911,GO:0009506,GO:0012505,GO:0016020,GO:0030054,GO:0030312,GO:0043226,GO:0043227,GO:0043229,GO:0043231,GO:0044424,GO:0044444,GO:0044464,GO:0055044,GO:0071944	-	ko:K14611	-	-	-	-	ko00000,ko02000	2.A.40.6	-	-	Xan_ur_permease
file_1_file_1_jg13756.t1	71139.XP_010043802.1	2.31e-182	512	28M20@1|root,2QTIQ@2759|Eukaryota,37HH6@33090|Viridiplantae,3GDBR@35493|Streptophyta	35493|Streptophyta	S	superfamily. Protein	-	-	-	-	-	-	-	-	-	-	-	-	Acetyltransf_1,Acetyltransf_10,FR47
file_1_file_2_19288_t	71139.XP_010043803.1	4.93e-247	679	COG0515@1|root,KOG1187@2759|Eukaryota,37RPX@33090|Viridiplantae,3G7XI@35493|Streptophyta	35493|Streptophyta	T	belongs to the protein kinase superfamily	-	GO:0002218,GO:0002221,GO:0002253,GO:0002376,GO:0002682,GO:0002684,GO:0002757,GO:0002758,GO:0002764,GO:0003674,GO:0003824,GO:0004672,GO:0004674,GO:0004675,GO:0004888,GO:0005575,GO:0005623,GO:0005886,GO:0006464,GO:0006468,GO:0006793,GO:0006796,GO:0006807,GO:0006950,GO:0006952,GO:0006955,GO:0007154,GO:0007165,GO:0007166,GO:0007167,GO:0007178,GO:0008150,GO:0008152,GO:0009605,GO:0009607,GO:0009617,GO:…	2.7.11.1	ko:K04733	ko04010,ko04064,ko04620,ko04621,ko04624,ko04722,ko05133,ko05140,ko05142,ko05145,ko05152,ko05162,ko05164,map04010,map04064,map04620,map04621,map04624,map04722,map05133,map05140,map05142,map05145,map05152,map05162,map05164	M00686	-	-	ko00000,ko00001,ko00002,ko01000,ko01001	-	-	-	Pkinase
file_1_file_1_jg13757.t1	71139.XP_010043803.1	8.96e-165	466	COG0515@1|root,KOG1187@2759|Eukaryota,37RPX@33090|Viridiplantae,3G7XI@35493|Streptophyta	35493|Streptophyta	T	belongs to the protein kinase superfamily	-	GO:0002218,GO:0002221,GO:0002253,GO:0002376,GO:0002682,GO:0002684,GO:0002757,GO:0002758,GO:0002764,GO:0003674,GO:0003824,GO:0004672,GO:0004674,GO:0004675,GO:0004888,GO:0005575,GO:0005623,GO:0005886,GO:0006464,GO:0006468,GO:0006793,GO:0006796,GO:0006807,GO:0006950,GO:0006952,GO:0006955,GO:0007154,GO:0007165,GO:0007166,GO:0007167,GO:0007178,GO:0008150,GO:0008152,GO:0009605,GO:0009607,GO:0009617,GO:…	2.7.11.1	ko:K04733	ko04010,ko04064,ko04620,ko04621,ko04624,ko04722,ko05133,ko05140,ko05142,ko05145,ko05152,ko05162,ko05164,map04010,map04064,map04620,map04621,map04624,map04722,map05133,map05140,map05142,map05145,map05152,map05162,map05164	M00686	-	-	ko00000,ko00001,ko00002,ko01000,ko01001	-	-	-	Pkinase
file_1_file_1_jg13759.t1	71139.XP_010043801.1	9.82e-96	280	29F1T@1|root,2RZUQ@2759|Eukaryota,37UVT@33090|Viridiplantae,3GIN7@35493|Streptophyta	35493|Streptophyta	S	MLP-like protein	-	GO:0005575,GO:0016020	-	-	-	-	-	-	-	-	-	-	Bet_v_1
file_1_file_1_jg13760.t1	71139.XP_010046448.1	5.17e-195	551	28N0B@1|root,2QW2M@2759|Eukaryota,37TEK@33090|Viridiplantae,3GB1R@35493|Streptophyta	35493|Streptophyta	S	WAT1-related protein	-	GO:0002831,GO:0002832,GO:0003674,GO:0005215,GO:0005575,GO:0005622,GO:0005623,GO:0005737,GO:0005783,GO:0005886,GO:0005887,GO:0005938,GO:0006810,GO:0007154,GO:0007165,GO:0008150,GO:0009719,GO:0009725,GO:0009733,GO:0009734,GO:0009755,GO:0009987,GO:0010033,GO:0012505,GO:0016020,GO:0016021,GO:0022857,GO:0023052,GO:0031224,GO:0031226,GO:0031347,GO:0031348,GO:0032101,GO:0032102,GO:0032870,GO:0042221,GO:…	-	-	-	-	-	-	-	-	-	-	EamA
file_1_file_1_jg13761.t1	71139.XP_010043800.1	6.18e-215	598	28N0B@1|root,2QRQK@2759|Eukaryota,37QYR@33090|Viridiplantae,3G887@35493|Streptophyta	35493|Streptophyta	S	WAT1-related protein	-	GO:0003674,GO:0005215,GO:0005575,GO:0005622,GO:0005623,GO:0005737,GO:0005886,GO:0005887,GO:0005938,GO:0006810,GO:0007154,GO:0007165,GO:0008150,GO:0009719,GO:0009725,GO:0009733,GO:0009734,GO:0009755,GO:0009987,GO:0010033,GO:0016020,GO:0016021,GO:0022857,GO:0023052,GO:0031224,GO:0031226,GO:0032870,GO:0042221,GO:0044424,GO:0044425,GO:0044444,GO:0044459,GO:0044464,GO:0050789,GO:0050794,GO:0050896,GO:…	-	-	-	-	-	-	-	-	-	-	EamA
file_1_file_1_jg13762.t1	71139.XP_010046447.1	1.52e-98	296	KOG1603@1|root,KOG1603@2759|Eukaryota,37TWX@33090|Viridiplantae,3GE5J@35493|Streptophyta	33090|Viridiplantae	P	metal ion transport	-	-	-	-	-	-	-	-	-	-	-	-	HMA
file_1_file_2_19294_t	71139.XP_010046447.1	9.27e-98	295	KOG1603@1|root,KOG1603@2759|Eukaryota,37TWX@33090|Viridiplantae,3GE5J@35493|Streptophyta	33090|Viridiplantae	P	metal ion transport	-	-	-	-	-	-	-	-	-	-	-	-	HMA
file_1_file_1_jg13763.t1	29760.VIT_06s0061g00430.t01	9.39e-75	224	COG5560@1|root,KOG1870@2759|Eukaryota,37UFR@33090|Viridiplantae,3GIYN@35493|Streptophyta	35493|Streptophyta	O	RIBOSOMAL protein	-	-	-	-	-	-	-	-	-	-	-	-	Ribosomal_L18p
file_1_file_1_jg13764.t1	71139.XP_010052021.1	2.01e-18	86.7	28JYJ@1|root,2QSCZ@2759|Eukaryota,37P4Z@33090|Viridiplantae,3GC0T@35493|Streptophyta	35493|Streptophyta	K	Auxin response factors (ARFs) are transcriptional factors that bind specifically to the DNA sequence 5'-TGTCTC-3' found in the auxin-responsive promoter elements (AuxREs)	-	-	-	-	-	-	-	-	-	-	-	-	AUX_IAA,Auxin_resp,B3
file_1_file_1_jg13765.t1	71139.XP_010046446.1	9.08e-69	209	2B65R@1|root,2S29C@2759|Eukaryota,37VK0@33090|Viridiplantae,3GKF3@35493|Streptophyta	35493|Streptophyta	S	auxin-responsive protein	-	-	-	ko:K14488	ko04075,map04075	-	-	-	ko00000,ko00001	-	-	-	Auxin_inducible
file_1_file_1_jg13766.t1	71139.XP_010043798.1	0	1015	COG0170@1|root,KOG2468@2759|Eukaryota,37HMM@33090|Viridiplantae,3GFS1@35493|Streptophyta	35493|Streptophyta	I	dolichol	-	-	2.7.1.108	ko:K00902	ko00510,ko01100,map00510,map01100	-	R01018	RC00002,RC00017	ko00000,ko00001,ko01000	-	-	-	-
file_1_file_1_jg13768.t1	71139.XP_010043797.1	1.44e-315	864	KOG1192@1|root,KOG1192@2759|Eukaryota,37PBM@33090|Viridiplantae,3G7DJ@35493|Streptophyta	35493|Streptophyta	CG	Belongs to the UDP-glycosyltransferase family	-	GO:0003674,GO:0003824,GO:0005575,GO:0005622,GO:0005623,GO:0008194,GO:0016740,GO:0016757,GO:0016758,GO:0035251,GO:0043226,GO:0043227,GO:0043229,GO:0043231,GO:0044424,GO:0044464,GO:0046527,GO:0080043,GO:0080044	2.4.1.324	ko:K21374	-	-	-	-	ko00000,ko01000,ko01003	-	GT1	-	UDPGT
file_1_file_1_jg13769.t1	71139.XP_010043796.1	0	1308	COG1131@1|root,KOG0061@2759|Eukaryota,37PFP@33090|Viridiplantae,3GEXB@35493|Streptophyta	35493|Streptophyta	Q	ABC transporter G family member	-	GO:0003674,GO:0003824,GO:0005215,GO:0005575,GO:0005623,GO:0005886,GO:0006810,GO:0008150,GO:0015399,GO:0015405,GO:0016020,GO:0016021,GO:0016462,GO:0016787,GO:0016817,GO:0016818,GO:0016887,GO:0017111,GO:0022804,GO:0022857,GO:0031224,GO:0042623,GO:0042626,GO:0043492,GO:0044425,GO:0044464,GO:0051179,GO:0051234,GO:0055085,GO:0071944	-	-	-	-	-	-	-	-	-	-	ABC2_membrane,ABC_tran
file_1_file_1_jg13772.t1	71139.XP_010046444.1	4.8e-99	308	KOG4197@1|root,KOG4197@2759|Eukaryota,37JNC@33090|Viridiplantae,3GHRT@35493|Streptophyta	35493|Streptophyta	S	Pentatricopeptide repeat-containing protein	-	GO:0000959,GO:0000963,GO:0003674,GO:0003676,GO:0003723,GO:0003824,GO:0004518,GO:0004519,GO:0005488,GO:0006139,GO:0006396,GO:0006397,GO:0006725,GO:0006807,GO:0008150,GO:0008152,GO:0009451,GO:0009987,GO:0010467,GO:0016070,GO:0016071,GO:0016787,GO:0016788,GO:0034641,GO:0043170,GO:0043412,GO:0044237,GO:0044238,GO:0046483,GO:0071704,GO:0090304,GO:0090305,GO:0090615,GO:0090617,GO:0097159,GO:0140053,GO:…	-	-	-	-	-	-	-	-	-	-	PPR,PPR_2
file_1_file_1_jg13773.t1	71139.XP_010043793.1	0	1295	COG2074@1|root,2QR37@2759|Eukaryota,37JPH@33090|Viridiplantae,3GB6T@35493|Streptophyta	35493|Streptophyta	G	protein DDB_G0273453 DDB_G0273565-like	-	GO:0006066,GO:0006793,GO:0006796,GO:0008150,GO:0008152,GO:0009058,GO:0009987,GO:0010264,GO:0017144,GO:0019637,GO:0019751,GO:0032958,GO:0033517,GO:0043647,GO:0044237,GO:0044281,GO:0044283,GO:0046165,GO:0046173,GO:0071704,GO:0090407,GO:1901576,GO:1901615,GO:1901617	-	-	-	-	-	-	-	-	-	-	AAA_33
file_1_file_1_jg13774.t1	71139.XP_010041169.1	1.11e-59	184	COG1997@1|root,KOG0402@2759|Eukaryota,37V8X@33090|Viridiplantae,3GJH4@35493|Streptophyta	35493|Streptophyta	J	60S ribosomal Protein	-	GO:0003674,GO:0003735,GO:0005198,GO:0005575,GO:0005622,GO:0005623,GO:0005737,GO:0005829,GO:0005840,GO:0015934,GO:0022625,GO:0022626,GO:0032991,GO:0043226,GO:0043228,GO:0043229,GO:0043232,GO:0044391,GO:0044422,GO:0044424,GO:0044444,GO:0044445,GO:0044446,GO:0044464,GO:1990904	-	ko:K02921	ko03010,map03010	M00177,M00179	-	-	br01610,ko00000,ko00001,ko00002,ko03011	-	-	-	Ribosomal_L37ae
file_1_file_1_jg13775.t1	71139.XP_010043791.1	0	1028	COG0459@1|root,KOG0356@2759|Eukaryota,37REH@33090|Viridiplantae,3GC7J@35493|Streptophyta	35493|Streptophyta	O	Belongs to the chaperonin (HSP60) family	-	GO:0000003,GO:0003006,GO:0003674,GO:0005488,GO:0005515,GO:0005575,GO:0005576,GO:0005622,GO:0005623,GO:0005737,GO:0005739,GO:0005829,GO:0005840,GO:0006457,GO:0006458,GO:0006996,GO:0007005,GO:0007275,GO:0008150,GO:0009507,GO:0009526,GO:0009532,GO:0009536,GO:0009570,GO:0009579,GO:0009657,GO:0009658,GO:0009790,GO:0009791,GO:0009793,GO:0009941,GO:0009987,GO:0010154,GO:0016020,GO:0016043,GO:0022414,GO:…	-	-	-	-	-	-	-	-	-	-	Cpn60_TCP1
file_1_file_1_jg13776.t1	4572.TRIUR3_29014-P1	1.68e-11	68.9	2CN6J@1|root,2QU5R@2759|Eukaryota,37S5H@33090|Viridiplantae,3GDWR@35493|Streptophyta,3KRUT@4447|Liliopsida	35493|Streptophyta	K	TCP family transcription factor	-	GO:0000003,GO:0001101,GO:0003006,GO:0003674,GO:0003700,GO:0005575,GO:0005622,GO:0005623,GO:0005634,GO:0006139,GO:0006259,GO:0006260,GO:0006261,GO:0006355,GO:0006725,GO:0006807,GO:0007049,GO:0007275,GO:0007623,GO:0008150,GO:0008152,GO:0008283,GO:0009058,GO:0009059,GO:0009719,GO:0009725,GO:0009735,GO:0009737,GO:0009739,GO:0009791,GO:0009889,GO:0009908,GO:0009962,GO:0009987,GO:0010029,GO:0010033,GO:…	-	-	-	-	-	-	-	-	-	-	TCP
file_1_file_1_jg13777.t1	71139.XP_010046443.1	0	1787	COG1131@1|root,KOG0061@2759|Eukaryota,37MGE@33090|Viridiplantae,3G74H@35493|Streptophyta	35493|Streptophyta	Q	ABC transporter G family member	-	GO:0003674,GO:0003824,GO:0005215,GO:0005575,GO:0005623,GO:0005886,GO:0006810,GO:0008150,GO:0015399,GO:0015405,GO:0016020,GO:0016021,GO:0016462,GO:0016787,GO:0016817,GO:0016818,GO:0016887,GO:0017111,GO:0022804,GO:0022857,GO:0031224,GO:0042623,GO:0042626,GO:0043492,GO:0044425,GO:0044464,GO:0051179,GO:0051234,GO:0055085,GO:0071944	-	-	-	-	-	-	-	-	-	-	ABC2_membrane,ABC_tran
file_1_file_2_19312_t	71139.XP_010046441.1	1.39e-209	592	COG0515@1|root,KOG1187@2759|Eukaryota,37M62@33090|Viridiplantae,3G7WT@35493|Streptophyta	35493|Streptophyta	T	lysM domain receptor-like kinase 3	-	-	-	-	-	-	-	-	-	-	-	-	Pkinase,Pkinase_Tyr
file_1_file_1_jg13778.t1	71139.XP_010046441.1	8.88e-213	601	COG0515@1|root,KOG1187@2759|Eukaryota,37M62@33090|Viridiplantae,3G7WT@35493|Streptophyta	35493|Streptophyta	T	lysM domain receptor-like kinase 3	-	-	-	-	-	-	-	-	-	-	-	-	Pkinase,Pkinase_Tyr
file_1_file_1_jg13779.t1	71139.XP_010043784.1	0	1576	2C7QK@1|root,2QQE0@2759|Eukaryota,37NU3@33090|Viridiplantae,3G99Z@35493|Streptophyta	35493|Streptophyta	S	Protein of unknown function (DUF 659)	-	-	-	-	-	-	-	-	-	-	-	-	DUF659,Dimer_Tnp_hAT,zf-BED
file_1_file_1_jg13780.t1	71139.XP_010043781.1	4.24e-100	294	28HP8@1|root,2RXVH@2759|Eukaryota,37TQ1@33090|Viridiplantae,3GH7E@35493|Streptophyta	35493|Streptophyta	S	Kiwellin-like	-	-	-	-	-	-	-	-	-	-	-	-	-
file_1_file_1_jg13782.t1	71139.XP_010043781.1	2.26e-134	382	28HP8@1|root,2RXVH@2759|Eukaryota,37TQ1@33090|Viridiplantae,3GH7E@35493|Streptophyta	35493|Streptophyta	S	Kiwellin-like	-	-	-	-	-	-	-	-	-	-	-	-	-
file_1_file_1_jg13783.t1	71139.XP_010043781.1	1.31e-135	385	28HP8@1|root,2RXVH@2759|Eukaryota,37TQ1@33090|Viridiplantae,3GH7E@35493|Streptophyta	35493|Streptophyta	S	Kiwellin-like	-	-	-	-	-	-	-	-	-	-	-	-	-
file_1_file_1_jg13784.t1	71139.XP_010046440.1	6.42e-121	348	28HP8@1|root,2RXVH@2759|Eukaryota,37TQ1@33090|Viridiplantae,3GH7E@35493|Streptophyta	35493|Streptophyta	S	Kiwellin-like	-	-	-	-	-	-	-	-	-	-	-	-	-
file_1_file_1_jg13785.t1	71139.XP_010043780.1	1.42e-166	469	COG3338@1|root,KOG0382@2759|Eukaryota,37SDA@33090|Viridiplantae,3GF18@35493|Streptophyta	35493|Streptophyta	P	carbonic anhydrase	-	-	4.2.1.1	ko:K01674	ko00910,map00910	-	R00132,R10092	RC02807	ko00000,ko00001,ko01000	-	-	-	Carb_anhydrase
file_1_file_1_jg13786.t2	71139.XP_010046438.1	0	964	28J4I@1|root,2QRGJ@2759|Eukaryota,37SHB@33090|Viridiplantae,3G75C@35493|Streptophyta	35493|Streptophyta	T	lysM domain receptor-like kinase	-	GO:0003674,GO:0003824,GO:0004672,GO:0004674,GO:0004675,GO:0004888,GO:0005488,GO:0005515,GO:0005575,GO:0005623,GO:0005886,GO:0006464,GO:0006468,GO:0006793,GO:0006796,GO:0006807,GO:0007154,GO:0007165,GO:0007166,GO:0007167,GO:0007178,GO:0008150,GO:0008152,GO:0009987,GO:0016020,GO:0016301,GO:0016310,GO:0016740,GO:0016772,GO:0016773,GO:0019199,GO:0019538,GO:0019899,GO:0019900,GO:0019901,GO:0023052,GO:…	-	-	-	-	-	-	-	-	-	-	LysM,Pkinase_Tyr
file_1_file_1_jg13786.t1	71139.XP_010046438.1	0	857	28J4I@1|root,2QRGJ@2759|Eukaryota,37SHB@33090|Viridiplantae,3G75C@35493|Streptophyta	35493|Streptophyta	T	lysM domain receptor-like kinase	-	GO:0003674,GO:0003824,GO:0004672,GO:0004674,GO:0004675,GO:0004888,GO:0005488,GO:0005515,GO:0005575,GO:0005623,GO:0005886,GO:0006464,GO:0006468,GO:0006793,GO:0006796,GO:0006807,GO:0007154,GO:0007165,GO:0007166,GO:0007167,GO:0007178,GO:0008150,GO:0008152,GO:0009987,GO:0016020,GO:0016301,GO:0016310,GO:0016740,GO:0016772,GO:0016773,GO:0019199,GO:0019538,GO:0019899,GO:0019900,GO:0019901,GO:0023052,GO:…	-	-	-	-	-	-	-	-	-	-	LysM,Pkinase_Tyr
file_1_file_1_jg13788.t1	71139.XP_010043776.1	0	2871	COG0553@1|root,KOG0383@2759|Eukaryota,KOG0384@2759|Eukaryota,37JPI@33090|Viridiplantae,3GD01@35493|Streptophyta	35493|Streptophyta	KL	helicase protein	-	GO:0003674,GO:0005488,GO:0005515,GO:0005575,GO:0005622,GO:0005623,GO:0005634,GO:0006325,GO:0006342,GO:0006344,GO:0006355,GO:0006996,GO:0008150,GO:0009889,GO:0009890,GO:0009892,GO:0009987,GO:0010468,GO:0010556,GO:0010558,GO:0010605,GO:0010629,GO:0016043,GO:0016458,GO:0019219,GO:0019222,GO:0031323,GO:0031324,GO:0031326,GO:0031327,GO:0040029,GO:0042802,GO:0042803,GO:0043226,GO:0043227,GO:0043229,GO:…	3.6.4.12	ko:K11642,ko:K11643,ko:K20091	ko05165,ko05203,map05165,map05203	-	-	-	ko00000,ko00001,ko01000,ko03036	-	-	-	Chromo,Helicase_C,SNF2_N
file_1_file_1_jg13788.t2	71139.XP_010043776.1	0	2871	COG0553@1|root,KOG0383@2759|Eukaryota,KOG0384@2759|Eukaryota,37JPI@33090|Viridiplantae,3GD01@35493|Streptophyta	35493|Streptophyta	KL	helicase protein	-	GO:0003674,GO:0005488,GO:0005515,GO:0005575,GO:0005622,GO:0005623,GO:0005634,GO:0006325,GO:0006342,GO:0006344,GO:0006355,GO:0006996,GO:0008150,GO:0009889,GO:0009890,GO:0009892,GO:0009987,GO:0010468,GO:0010556,GO:0010558,GO:0010605,GO:0010629,GO:0016043,GO:0016458,GO:0019219,GO:0019222,GO:0031323,GO:0031324,GO:0031326,GO:0031327,GO:0040029,GO:0042802,GO:0042803,GO:0043226,GO:0043227,GO:0043229,GO:…	3.6.4.12	ko:K11642,ko:K11643,ko:K20091	ko05165,ko05203,map05165,map05203	-	-	-	ko00000,ko00001,ko01000,ko03036	-	-	-	Chromo,Helicase_C,SNF2_N
file_1_file_2_19326_t	71139.XP_010043773.1	0	1246	COG2304@1|root,2QTMS@2759|Eukaryota,37IGH@33090|Viridiplantae,3GH3Q@35493|Streptophyta	35493|Streptophyta	O	Zinc finger (C3HC4-type RING finger) family protein	-	-	-	-	-	-	-	-	-	-	-	-	VWA,Vwaint,zf-RING_11,zf-RING_2
file_1_file_1_jg13789.t2	71139.XP_010043773.1	0	1251	COG2304@1|root,2QTMS@2759|Eukaryota,37IGH@33090|Viridiplantae,3GH3Q@35493|Streptophyta	35493|Streptophyta	O	Zinc finger (C3HC4-type RING finger) family protein	-	-	-	-	-	-	-	-	-	-	-	-	VWA,Vwaint,zf-RING_11,zf-RING_2
file_1_file_1_jg13789.t1	71139.XP_010043773.1	0	1245	COG2304@1|root,2QTMS@2759|Eukaryota,37IGH@33090|Viridiplantae,3GH3Q@35493|Streptophyta	35493|Streptophyta	O	Zinc finger (C3HC4-type RING finger) family protein	-	-	-	-	-	-	-	-	-	-	-	-	VWA,Vwaint,zf-RING_11,zf-RING_2
file_1_file_1_jg13790.t1	71139.XP_010043769.1	0	1070	COG0515@1|root,KOG1187@2759|Eukaryota,37RR2@33090|Viridiplantae,3GA5E@35493|Streptophyta	35493|Streptophyta	T	Receptor-like serine threonine-protein kinase NCRK	-	GO:0003674,GO:0003824,GO:0004672,GO:0004674,GO:0004675,GO:0004888,GO:0005488,GO:0005515,GO:0005575,GO:0005622,GO:0005623,GO:0005737,GO:0005768,GO:0005886,GO:0006464,GO:0006468,GO:0006793,GO:0006796,GO:0006807,GO:0007154,GO:0007165,GO:0007166,GO:0007167,GO:0007178,GO:0008150,GO:0008152,GO:0009888,GO:0009987,GO:0010008,GO:0010087,GO:0010089,GO:0012505,GO:0016020,GO:0016301,GO:0016310,GO:0016740,GO:…	-	-	-	-	-	-	-	-	-	-	Pkinase,Pkinase_Tyr
file_1_file_1_jg13791.t1	71139.XP_010043766.1	0	1276	KOG0498@1|root,KOG0498@2759|Eukaryota,37M4X@33090|Viridiplantae,3GCEZ@35493|Streptophyta	35493|Streptophyta	P	cyclic nucleotide-gated ion channel	-	-	-	ko:K05391	ko04626,map04626	-	-	-	ko00000,ko00001,ko04040	1.A.1.5	-	-	Ion_trans,cNMP_binding
file_1_file_2_19331_t	71139.XP_010043766.1	0	1236	KOG0498@1|root,KOG0498@2759|Eukaryota,37M4X@33090|Viridiplantae,3GCEZ@35493|Streptophyta	35493|Streptophyta	P	cyclic nucleotide-gated ion channel	-	-	-	ko:K05391	ko04626,map04626	-	-	-	ko00000,ko00001,ko04040	1.A.1.5	-	-	Ion_trans,cNMP_binding
file_1_file_1_jg13792.t1	71139.XP_010043764.1	7.06e-138	391	COG1611@1|root,2QSR9@2759|Eukaryota,37JDV@33090|Viridiplantae,3G7RR@35493|Streptophyta	35493|Streptophyta	G	Cytokinin-activating enzyme working in the direct activation pathway. Phosphoribohydrolase that converts inactive cytokinin nucleotides to the biologically active free-base forms	-	GO:0005575,GO:0005622,GO:0005623,GO:0005634,GO:0005737,GO:0005829,GO:0043226,GO:0043227,GO:0043229,GO:0043231,GO:0044424,GO:0044444,GO:0044464	-	-	-	-	-	-	-	-	-	-	Lysine_decarbox
file_1_file_1_jg13793.t1	71139.XP_010043762.1	0	1786	2CMCB@1|root,2QPYF@2759|Eukaryota,37MZ0@33090|Viridiplantae,3GCYF@35493|Streptophyta	35493|Streptophyta	-	-	-	-	-	-	-	-	-	-	-	-	-	-	-
file_1_file_1_jg13794.t1	71139.XP_010043761.1	4.75e-269	736	28HZG@1|root,2QQAA@2759|Eukaryota,37MVM@33090|Viridiplantae,3G9UM@35493|Streptophyta	35493|Streptophyta	S	BEST Arabidopsis thaliana protein match is Protein of	-	-	-	-	-	-	-	-	-	-	-	-	DUF707
file_1_file_1_jg13795.t1	71139.XP_010043760.1	1.5e-162	468	KOG1441@1|root,KOG1441@2759|Eukaryota,37J1F@33090|Viridiplantae,3GAZN@35493|Streptophyta	35493|Streptophyta	EG	membrane protein At1g06890-like	-	GO:0003674,GO:0005215,GO:0005338,GO:0005464,GO:0005575,GO:0005622,GO:0005623,GO:0005737,GO:0005783,GO:0005794,GO:0006810,GO:0006811,GO:0006820,GO:0008150,GO:0008509,GO:0008514,GO:0012505,GO:0015075,GO:0015165,GO:0015291,GO:0015297,GO:0015711,GO:0015780,GO:0015790,GO:0015931,GO:0015932,GO:0022804,GO:0022857,GO:0034220,GO:0043226,GO:0043227,GO:0043229,GO:0043231,GO:0044424,GO:0044444,GO:0044464,GO:…	-	ko:K15285	-	-	-	-	ko00000,ko02000	-	-	-	TPT
file_1_file_1_jg13796.t1	71139.XP_010043759.1	0	963	28I9F@1|root,2QQJT@2759|Eukaryota,37N7C@33090|Viridiplantae,3G7Y8@35493|Streptophyta	35493|Streptophyta	T	Protein ENHANCED DISEASE RESISTANCE	-	-	-	-	-	-	-	-	-	-	-	-	DUF1336,PH,START
file_1_file_1_jg13796.t2	71139.XP_010043759.1	0	1291	28I9F@1|root,2QQJT@2759|Eukaryota,37N7C@33090|Viridiplantae,3G7Y8@35493|Streptophyta	35493|Streptophyta	T	Protein ENHANCED DISEASE RESISTANCE	-	-	-	-	-	-	-	-	-	-	-	-	DUF1336,PH,START
file_1_file_1_jg13797.t1	71139.XP_010043758.1	1.4e-46	163	28P8S@1|root,2QVVW@2759|Eukaryota,37NIG@33090|Viridiplantae,3GEG8@35493|Streptophyta	35493|Streptophyta	S	Protein-tyrosine	-	GO:0002376,GO:0003674,GO:0003824,GO:0005575,GO:0005622,GO:0005623,GO:0005737,GO:0005768,GO:0005794,GO:0005802,GO:0006029,GO:0006521,GO:0006807,GO:0006950,GO:0006952,GO:0006955,GO:0007275,GO:0008146,GO:0008150,GO:0008152,GO:0008476,GO:0009058,GO:0009059,GO:0009100,GO:0009101,GO:0009653,GO:0009719,GO:0009725,GO:0009733,GO:0009888,GO:0009889,GO:0009890,GO:0009892,GO:0009987,GO:0010015,GO:0010033,GO:…	2.8.2.20	ko:K22218	-	-	-	-	ko00000,ko01000	-	-	-	Sulfotransfer_1,Sulfotransfer_2
file_1_file_1_jg13798.t1	71139.XP_010043758.1	6.37e-93	289	28P8S@1|root,2QVVW@2759|Eukaryota,37NIG@33090|Viridiplantae,3GEG8@35493|Streptophyta	35493|Streptophyta	S	Protein-tyrosine	-	GO:0002376,GO:0003674,GO:0003824,GO:0005575,GO:0005622,GO:0005623,GO:0005737,GO:0005768,GO:0005794,GO:0005802,GO:0006029,GO:0006521,GO:0006807,GO:0006950,GO:0006952,GO:0006955,GO:0007275,GO:0008146,GO:0008150,GO:0008152,GO:0008476,GO:0009058,GO:0009059,GO:0009100,GO:0009101,GO:0009653,GO:0009719,GO:0009725,GO:0009733,GO:0009888,GO:0009889,GO:0009890,GO:0009892,GO:0009987,GO:0010015,GO:0010033,GO:…	2.8.2.20	ko:K22218	-	-	-	-	ko00000,ko01000	-	-	-	Sulfotransfer_1,Sulfotransfer_2
file_1_file_1_jg13799.t1	71139.XP_010043758.1	1.52e-306	842	28P8S@1|root,2QVVW@2759|Eukaryota,37NIG@33090|Viridiplantae,3GEG8@35493|Streptophyta	35493|Streptophyta	S	Protein-tyrosine	-	GO:0002376,GO:0003674,GO:0003824,GO:0005575,GO:0005622,GO:0005623,GO:0005737,GO:0005768,GO:0005794,GO:0005802,GO:0006029,GO:0006521,GO:0006807,GO:0006950,GO:0006952,GO:0006955,GO:0007275,GO:0008146,GO:0008150,GO:0008152,GO:0008476,GO:0009058,GO:0009059,GO:0009100,GO:0009101,GO:0009653,GO:0009719,GO:0009725,GO:0009733,GO:0009888,GO:0009889,GO:0009890,GO:0009892,GO:0009987,GO:0010015,GO:0010033,GO:…	2.8.2.20	ko:K22218	-	-	-	-	ko00000,ko01000	-	-	-	Sulfotransfer_1,Sulfotransfer_2
file_1_file_1_jg13799.t2	71139.XP_010043758.1	3.72e-304	837	28P8S@1|root,2QVVW@2759|Eukaryota,37NIG@33090|Viridiplantae,3GEG8@35493|Streptophyta	35493|Streptophyta	S	Protein-tyrosine	-	GO:0002376,GO:0003674,GO:0003824,GO:0005575,GO:0005622,GO:0005623,GO:0005737,GO:0005768,GO:0005794,GO:0005802,GO:0006029,GO:0006521,GO:0006807,GO:0006950,GO:0006952,GO:0006955,GO:0007275,GO:0008146,GO:0008150,GO:0008152,GO:0008476,GO:0009058,GO:0009059,GO:0009100,GO:0009101,GO:0009653,GO:0009719,GO:0009725,GO:0009733,GO:0009888,GO:0009889,GO:0009890,GO:0009892,GO:0009987,GO:0010015,GO:0010033,GO:…	2.8.2.20	ko:K22218	-	-	-	-	ko00000,ko01000	-	-	-	Sulfotransfer_1,Sulfotransfer_2
file_1_file_1_jg13800.t1	71139.XP_010043758.1	4.69e-249	697	28P8S@1|root,2QVVW@2759|Eukaryota,37NIG@33090|Viridiplantae,3GEG8@35493|Streptophyta	35493|Streptophyta	S	Protein-tyrosine	-	GO:0002376,GO:0003674,GO:0003824,GO:0005575,GO:0005622,GO:0005623,GO:0005737,GO:0005768,GO:0005794,GO:0005802,GO:0006029,GO:0006521,GO:0006807,GO:0006950,GO:0006952,GO:0006955,GO:0007275,GO:0008146,GO:0008150,GO:0008152,GO:0008476,GO:0009058,GO:0009059,GO:0009100,GO:0009101,GO:0009653,GO:0009719,GO:0009725,GO:0009733,GO:0009888,GO:0009889,GO:0009890,GO:0009892,GO:0009987,GO:0010015,GO:0010033,GO:…	2.8.2.20	ko:K22218	-	-	-	-	ko00000,ko01000	-	-	-	Sulfotransfer_1,Sulfotransfer_2
file_1_file_1_jg13801.t1	71139.XP_010046437.1	4.31e-35	128	COG5641@1|root,KOG1601@2759|Eukaryota	2759|Eukaryota	K	transcription, DNA-templated	-	-	-	-	-	-	-	-	-	-	-	-	GATA
file_1_file_1_jg13803.t1	71139.XP_010043756.1	4.92e-303	841	KOG4197@1|root,KOG4197@2759|Eukaryota,37S9H@33090|Viridiplantae,3GGQA@35493|Streptophyta	35493|Streptophyta	U	Pentatricopeptide repeat-containing protein	-	-	-	ko:K17710	-	-	-	-	ko00000,ko03016,ko03029	-	-	-	PPR,PPR_2
file_1_file_1_jg13804.t1	71139.XP_010043754.1	0	1321	KOG2073@1|root,KOG2073@2759|Eukaryota,37QVW@33090|Viridiplantae,3G88C@35493|Streptophyta	35493|Streptophyta	D	Serine threonine-protein phosphatase 6 regulatory subunit	-	-	-	ko:K15501	-	-	-	-	ko00000,ko01009,ko03400	-	-	-	SAPS
file_1_file_1_jg13804.t2	71139.XP_010043754.1	0	1316	KOG2073@1|root,KOG2073@2759|Eukaryota,37QVW@33090|Viridiplantae,3G88C@35493|Streptophyta	35493|Streptophyta	D	Serine threonine-protein phosphatase 6 regulatory subunit	-	-	-	ko:K15501	-	-	-	-	ko00000,ko01009,ko03400	-	-	-	SAPS
file_1_file_1_jg13806.t1	71139.XP_010043753.1	0	1397	28H7Z@1|root,2QRJM@2759|Eukaryota,37HH8@33090|Viridiplantae,3GBPY@35493|Streptophyta	35493|Streptophyta	K	homeobox-leucine zipper protein	REV	GO:0001067,GO:0003002,GO:0003674,GO:0003676,GO:0003677,GO:0003700,GO:0005488,GO:0005575,GO:0005622,GO:0005623,GO:0005634,GO:0006355,GO:0007275,GO:0007389,GO:0008150,GO:0009653,GO:0009798,GO:0009799,GO:0009855,GO:0009888,GO:0009889,GO:0009933,GO:0009943,GO:0009944,GO:0009955,GO:0009956,GO:0009987,GO:0010014,GO:0010051,GO:0010087,GO:0010089,GO:0010468,GO:0010556,GO:0019219,GO:0019222,GO:0030154,GO:…	-	ko:K09338	-	-	-	-	ko00000,ko03000	-	-	-	Homeobox,MEKHLA,START
file_1_file_1_jg13807.t1	71139.XP_010043752.1	4.11e-169	484	28KUZ@1|root,2QTBA@2759|Eukaryota,37I50@33090|Viridiplantae,3G99T@35493|Streptophyta	35493|Streptophyta	J	Double-stranded RNA-binding protein	DRB2	GO:0003674,GO:0003676,GO:0003723,GO:0003725,GO:0005488,GO:0005575,GO:0005622,GO:0005623,GO:0005737,GO:0006139,GO:0006325,GO:0006342,GO:0006355,GO:0006396,GO:0006725,GO:0006807,GO:0006996,GO:0008150,GO:0008152,GO:0009889,GO:0009890,GO:0009892,GO:0009987,GO:0010033,GO:0010467,GO:0010468,GO:0010556,GO:0010558,GO:0010605,GO:0010608,GO:0010629,GO:0014070,GO:0016043,GO:0016070,GO:0016441,GO:0016458,GO:…	-	-	-	-	-	-	-	-	-	-	dsrm
file_1_file_1_jg13809.t1	71139.XP_010043751.1	0	1054	KOG0997@1|root,KOG0997@2759|Eukaryota,37KB6@33090|Viridiplantae,3G922@35493|Streptophyta	35493|Streptophyta	S	Vacuolar fusion protein	-	GO:0005575,GO:0005622,GO:0005623,GO:0005737,GO:0005768,GO:0006810,GO:0006886,GO:0006996,GO:0007033,GO:0007034,GO:0007275,GO:0008104,GO:0008150,GO:0009987,GO:0012505,GO:0015031,GO:0015833,GO:0016043,GO:0016192,GO:0031410,GO:0031982,GO:0032501,GO:0032502,GO:0033036,GO:0034613,GO:0042886,GO:0043226,GO:0043227,GO:0043229,GO:0044424,GO:0044444,GO:0044464,GO:0045184,GO:0045324,GO:0046907,GO:0048731,GO:…	-	ko:K20195	ko04138,map04138	-	-	-	ko00000,ko00001,ko04131	-	-	-	Mon1
file_1_file_1_jg13810.t1	71139.XP_010043750.1	7.49e-87	259	2C42X@1|root,2RZ83@2759|Eukaryota,37UJH@33090|Viridiplantae,3GINY@35493|Streptophyta	35493|Streptophyta	S	Senescence regulator	-	-	-	-	-	-	-	-	-	-	-	-	Senescence_reg
file_1_file_1_jg13811.t1	71139.XP_010043746.1	1.52e-76	230	2BR3H@1|root,2S1VQ@2759|Eukaryota,37VFM@33090|Viridiplantae,3GJBS@35493|Streptophyta	35493|Streptophyta	-	-	-	-	-	-	-	-	-	-	-	-	-	-	-
file_1_file_1_jg13812.t1	71139.XP_010043745.1	6.8e-42	138	2E2JE@1|root,2S9SR@2759|Eukaryota,37WW9@33090|Viridiplantae,3GKWW@35493|Streptophyta	35493|Streptophyta	-	-	-	-	-	-	-	-	-	-	-	-	-	-	-
file_1_file_1_jg13813.t1	71139.XP_010043744.1	0	998	COG0526@1|root,KOG0190@2759|Eukaryota,37JKB@33090|Viridiplantae,3GC2Y@35493|Streptophyta	35493|Streptophyta	O	protein disulfide isomerase-like	PDIL1-4	GO:0003674,GO:0003756,GO:0003824,GO:0005575,GO:0005622,GO:0005623,GO:0005737,GO:0005739,GO:0005773,GO:0005774,GO:0005783,GO:0006457,GO:0006950,GO:0006979,GO:0008150,GO:0009507,GO:0009536,GO:0009987,GO:0012505,GO:0016020,GO:0016853,GO:0016860,GO:0016864,GO:0031090,GO:0033554,GO:0034976,GO:0043226,GO:0043227,GO:0043229,GO:0043231,GO:0044422,GO:0044424,GO:0044437,GO:0044444,GO:0044446,GO:0044464,GO:…	5.3.4.1	ko:K09580	ko04141,map04141	-	-	-	ko00000,ko00001,ko01000,ko03110,ko04131,ko04147	-	-	-	Thioredoxin,Thioredoxin_6
file_1_file_1_jg13815.t1	3750.XP_008344870.1	1.55e-07	55.8	2CYE4@1|root,2S3TU@2759|Eukaryota,37WBY@33090|Viridiplantae,3GKHD@35493|Streptophyta,4JQMH@91835|fabids	35493|Streptophyta	S	Classical arabinogalactan protein	-	-	-	-	-	-	-	-	-	-	-	-	-
file_1_file_1_jg13816.t1	981085.XP_010098198.1	0	1586	COG0009@1|root,KOG3051@2759|Eukaryota	2759|Eukaryota	J	L-threonylcarbamoyladenylate synthase	YRDC	GO:0000049,GO:0002949,GO:0003674,GO:0003676,GO:0003723,GO:0003824,GO:0005488,GO:0005575,GO:0005622,GO:0005623,GO:0005737,GO:0006139,GO:0006396,GO:0006399,GO:0006400,GO:0006450,GO:0006725,GO:0006807,GO:0008033,GO:0008150,GO:0008152,GO:0009451,GO:0009987,GO:0010467,GO:0016020,GO:0016070,GO:0016740,GO:0016772,GO:0016779,GO:0032879,GO:0034470,GO:0034641,GO:0034660,GO:0043170,GO:0043412,GO:0044237,GO:…	3.1.13.4	ko:K19612	-	-	-	-	ko00000,ko01000,ko03019,ko03029	-	-	-	Sua5_yciO_yrdC
file_1_file_2_19356_t	71139.XP_010043742.1	3.05e-170	478	COG0009@1|root,KOG3051@2759|Eukaryota,37NBX@33090|Viridiplantae,3GAUJ@35493|Streptophyta	35493|Streptophyta	J	YrdC domain-containing protein	-	-	-	-	-	-	-	-	-	-	-	-	Sua5_yciO_yrdC
file_1_file_1_jg13817.t1	71139.XP_010043740.1	3.72e-292	806	COG5183@1|root,KOG1609@2759|Eukaryota,37QRX@33090|Viridiplantae,3GARZ@35493|Streptophyta	35493|Streptophyta	A	zinc finger	-	-	-	-	-	-	-	-	-	-	-	-	RINGv
file_1_file_1_jg13818.t1	71139.XP_010043736.1	3.42e-259	712	KOG1072@1|root,KOG1072@2759|Eukaryota,37JFG@33090|Viridiplantae,3GA4U@35493|Streptophyta	35493|Streptophyta	S	F-box Kelch-repeat protein	-	GO:0000151,GO:0003674,GO:0005488,GO:0005515,GO:0005575,GO:0005622,GO:0005623,GO:0005634,GO:0005737,GO:0006508,GO:0006511,GO:0006807,GO:0008150,GO:0008152,GO:0009056,GO:0009057,GO:0009987,GO:0010498,GO:0019005,GO:0019222,GO:0019538,GO:0019899,GO:0019941,GO:0030162,GO:0030163,GO:0031461,GO:0031625,GO:0032991,GO:0043161,GO:0043170,GO:0043226,GO:0043227,GO:0043229,GO:0043231,GO:0043632,GO:0044237,GO:…	-	-	-	-	-	-	-	-	-	-	F-box,Kelch_1
file_1_file_1_jg13819.t1	71139.XP_010043733.1	4.86e-253	700	KOG0585@1|root,KOG0585@2759|Eukaryota,37RDJ@33090|Viridiplantae,3GGWE@35493|Streptophyta	35493|Streptophyta	T	belongs to the protein kinase superfamily	-	GO:0003674,GO:0003824,GO:0004672,GO:0004674,GO:0005575,GO:0005622,GO:0005623,GO:0006464,GO:0006468,GO:0006793,GO:0006796,GO:0006807,GO:0007154,GO:0007165,GO:0008150,GO:0008152,GO:0009605,GO:0009607,GO:0009615,GO:0009987,GO:0016301,GO:0016310,GO:0016740,GO:0016772,GO:0016773,GO:0018105,GO:0018107,GO:0018193,GO:0018209,GO:0018210,GO:0019538,GO:0023052,GO:0030587,GO:0031156,GO:0032502,GO:0035556,GO:…	2.7.11.17	ko:K00908,ko:K07359	ko04140,ko04152,ko04211,ko04920,ko04921,ko05034,map04140,map04152,map04211,map04920,map04921,map05034	-	-	-	ko00000,ko00001,ko01000,ko01001	-	-	-	Pkinase
file_1_file_1_jg13820.t1	71139.XP_010032568.1	3.5e-64	219	28KFA@1|root,2QSWA@2759|Eukaryota,37J50@33090|Viridiplantae,3GGB9@35493|Streptophyta	35493|Streptophyta	-	-	-	-	-	ko:K17964	-	-	-	-	ko00000,ko03029	-	-	-	-
file_1_file_1_jg13820.t2	71139.XP_010032568.1	3.13e-64	219	28KFA@1|root,2QSWA@2759|Eukaryota,37J50@33090|Viridiplantae,3GGB9@35493|Streptophyta	35493|Streptophyta	-	-	-	-	-	ko:K17964	-	-	-	-	ko00000,ko03029	-	-	-	-
file_1_file_1_jg13821.t1	71139.XP_010043731.1	5.15e-163	459	COG0311@1|root,KOG3210@2759|Eukaryota,37QSN@33090|Viridiplantae,3G8JF@35493|Streptophyta	35493|Streptophyta	H	Pyridoxal biosynthesis protein	-	GO:0003674,GO:0003824,GO:0004359,GO:0005488,GO:0005515,GO:0005575,GO:0005622,GO:0005623,GO:0005737,GO:0005829,GO:0006081,GO:0006725,GO:0006732,GO:0006766,GO:0006767,GO:0006793,GO:0006796,GO:0006807,GO:0008150,GO:0008152,GO:0008614,GO:0009058,GO:0009108,GO:0009110,GO:0009987,GO:0016787,GO:0016810,GO:0016811,GO:0017144,GO:0018130,GO:0019438,GO:0019637,GO:0032991,GO:0034641,GO:0042364,GO:0042816,GO:…	4.3.3.6	ko:K08681	ko00750,map00750	-	R07456	RC00010,RC01783,RC03043	ko00000,ko00001,ko01000	-	-	-	SNO
file_1_file_1_jg13822.t1	71139.XP_010043730.1	4.69e-219	607	28JQY@1|root,2QS4C@2759|Eukaryota,37PTE@33090|Viridiplantae,3G8NK@35493|Streptophyta	35493|Streptophyta	S	late embryogenesis abundant protein-related LEA protein-related	-	-	-	-	-	-	-	-	-	-	-	-	Root_cap
file_1_file_1_jg13823.t1	71139.XP_010046435.1	5.96e-55	184	COG5208@1|root,KOG1657@2759|Eukaryota,37VKG@33090|Viridiplantae,3GK7N@35493|Streptophyta	35493|Streptophyta	K	DNA polymerase epsilon subunit	-	-	2.7.7.7	ko:K03506,ko:K11656	ko00230,ko00240,ko01100,ko03030,ko03410,ko03420,ko05166,map00230,map00240,map01100,map03030,map03410,map03420,map05166	M00263	R00375,R00376,R00377,R00378	RC02795	ko00000,ko00001,ko00002,ko01000,ko03032,ko03036,ko03400	-	-	-	CBFD_NFYB_HMF
file_1_file_1_jg13824.t1	71139.XP_010043729.1	3.95e-120	351	28HQD@1|root,2QQ1S@2759|Eukaryota,37T57@33090|Viridiplantae,3GEYE@35493|Streptophyta	35493|Streptophyta	S	Fasciclin-like arabinogalactan protein	-	GO:0005575,GO:0005623,GO:0005886,GO:0008150,GO:0009832,GO:0009834,GO:0009987,GO:0016020,GO:0031224,GO:0031225,GO:0042546,GO:0044085,GO:0044425,GO:0044464,GO:0071554,GO:0071669,GO:0071840,GO:0071944	-	-	-	-	-	-	-	-	-	-	Fasciclin
file_1_file_2_19367_t	71139.XP_010043728.1	3.04e-272	752	KOG1721@1|root,KOG1721@2759|Eukaryota,37N8H@33090|Viridiplantae,3G7YF@35493|Streptophyta	33090|Viridiplantae	S	Zinc finger protein	-	-	-	-	-	-	-	-	-	-	-	-	zf-C2H2
file_1_file_1_jg13825.t1	71139.XP_010043728.1	1.9e-288	793	KOG1721@1|root,KOG1721@2759|Eukaryota,37N8H@33090|Viridiplantae,3G7YF@35493|Streptophyta	33090|Viridiplantae	S	Zinc finger protein	-	-	-	-	-	-	-	-	-	-	-	-	zf-C2H2
file_1_file_1_jg13826.t1	3641.EOY33050	2.86e-128	380	28IZK@1|root,2QV9E@2759|Eukaryota,37QQC@33090|Viridiplantae,3GE84@35493|Streptophyta	35493|Streptophyta	K	NAC domain-containing protein	-	-	-	-	-	-	-	-	-	-	-	-	NAM
file_1_file_1_jg13829.t1	71139.XP_010043720.1	0	914	28NKH@1|root,2QV68@2759|Eukaryota,37RGA@33090|Viridiplantae,3GGJ1@35493|Streptophyta	35493|Streptophyta	I	May be involved in modulation of pathogen defense and leaf cell death	-	-	-	ko:K08472	-	-	-	-	ko00000,ko04030	-	-	-	Mlo
file_1_file_1_jg13830.t1	71139.XP_010043719.1	2.79e-305	844	28PDT@1|root,2QW1A@2759|Eukaryota,37QZY@33090|Viridiplantae,3GDXH@35493|Streptophyta	35493|Streptophyta	G	May be involved in modulation of pathogen defense and leaf cell death	-	GO:0005575,GO:0005623,GO:0005886,GO:0006950,GO:0006952,GO:0008150,GO:0016020,GO:0044464,GO:0050896,GO:0071944	-	ko:K08472	-	-	-	-	ko00000,ko04030	-	-	-	Mlo
file_1_file_2_19372_t	71139.XP_010043718.1	0	1408	28JYJ@1|root,2QTCY@2759|Eukaryota,37M2J@33090|Viridiplantae,3GCUI@35493|Streptophyta	35493|Streptophyta	K	Auxin response factors (ARFs) are transcriptional factors that bind specifically to the DNA sequence 5'-TGTCTC-3' found in the auxin-responsive promoter elements (AuxREs)	ARF4	GO:0001708,GO:0003674,GO:0003700,GO:0005575,GO:0005622,GO:0005623,GO:0005634,GO:0006355,GO:0007275,GO:0008150,GO:0009791,GO:0009889,GO:0009987,GO:0010050,GO:0010158,GO:0010468,GO:0010556,GO:0019219,GO:0019222,GO:0030154,GO:0031323,GO:0031326,GO:0032501,GO:0032502,GO:0043226,GO:0043227,GO:0043229,GO:0043231,GO:0044424,GO:0044464,GO:0045165,GO:0048856,GO:0048869,GO:0050789,GO:0050794,GO:0051171,GO:…	-	-	-	-	-	-	-	-	-	-	AUX_IAA,Auxin_resp,B3
file_1_file_1_jg13831.t1	71139.XP_010043718.1	0	1347	28JYJ@1|root,2QTCY@2759|Eukaryota,37M2J@33090|Viridiplantae,3GCUI@35493|Streptophyta	35493|Streptophyta	K	Auxin response factors (ARFs) are transcriptional factors that bind specifically to the DNA sequence 5'-TGTCTC-3' found in the auxin-responsive promoter elements (AuxREs)	ARF4	GO:0001708,GO:0003674,GO:0003700,GO:0005575,GO:0005622,GO:0005623,GO:0005634,GO:0006355,GO:0007275,GO:0008150,GO:0009791,GO:0009889,GO:0009987,GO:0010050,GO:0010158,GO:0010468,GO:0010556,GO:0019219,GO:0019222,GO:0030154,GO:0031323,GO:0031326,GO:0032501,GO:0032502,GO:0043226,GO:0043227,GO:0043229,GO:0043231,GO:0044424,GO:0044464,GO:0045165,GO:0048856,GO:0048869,GO:0050789,GO:0050794,GO:0051171,GO:…	-	-	-	-	-	-	-	-	-	-	AUX_IAA,Auxin_resp,B3
file_1_file_1_jg13832.t1	71139.XP_010043716.1	1.2e-283	776	COG1960@1|root,KOG0141@2759|Eukaryota,37N2U@33090|Viridiplantae,3GFCE@35493|Streptophyta	35493|Streptophyta	EI	Isovaleryl-CoA dehydrogenase	IVD	GO:0000166,GO:0003674,GO:0003824,GO:0003853,GO:0003995,GO:0005488,GO:0005524,GO:0005575,GO:0005622,GO:0005623,GO:0005737,GO:0005739,GO:0005759,GO:0006082,GO:0006139,GO:0006163,GO:0006195,GO:0006520,GO:0006551,GO:0006552,GO:0006637,GO:0006725,GO:0006732,GO:0006753,GO:0006790,GO:0006793,GO:0006796,GO:0006807,GO:0008144,GO:0008150,GO:0008152,GO:0008470,GO:0009056,GO:0009058,GO:0009063,GO:0009081,GO:…	1.3.8.4	ko:K00253	ko00280,ko01100,map00280,map01100	M00036	R04095	RC00246	ko00000,ko00001,ko00002,ko01000	-	-	-	Acyl-CoA_dh_1,Acyl-CoA_dh_M,Acyl-CoA_dh_N
file_1_file_1_jg13833.t1	71139.XP_010043707.1	0	1514	KOG2169@1|root,KOG2169@2759|Eukaryota,37MJS@33090|Viridiplantae,3G94P@35493|Streptophyta	35493|Streptophyta	K	E3 SUMO-protein ligase	SIZ1	GO:0000003,GO:0000902,GO:0001101,GO:0002682,GO:0002683,GO:0002831,GO:0002832,GO:0003006,GO:0003674,GO:0003824,GO:0005575,GO:0005622,GO:0005623,GO:0005634,GO:0006464,GO:0006807,GO:0006935,GO:0006950,GO:0007154,GO:0007275,GO:0008150,GO:0008152,GO:0009266,GO:0009267,GO:0009408,GO:0009409,GO:0009414,GO:0009415,GO:0009553,GO:0009593,GO:0009605,GO:0009628,GO:0009653,GO:0009787,GO:0009791,GO:0009826,GO:…	-	ko:K04706,ko:K16063,ko:K22403	ko04120,ko04630,ko05160,map04120,map04630,map05160	-	-	-	ko00000,ko00001,ko04121,ko04812	-	-	-	PHD,SAP,zf-MIZ
file_1_file_1_jg13833.t2	71139.XP_010043707.1	0	1511	KOG2169@1|root,KOG2169@2759|Eukaryota,37MJS@33090|Viridiplantae,3G94P@35493|Streptophyta	35493|Streptophyta	K	E3 SUMO-protein ligase	SIZ1	GO:0000003,GO:0000902,GO:0001101,GO:0002682,GO:0002683,GO:0002831,GO:0002832,GO:0003006,GO:0003674,GO:0003824,GO:0005575,GO:0005622,GO:0005623,GO:0005634,GO:0006464,GO:0006807,GO:0006935,GO:0006950,GO:0007154,GO:0007275,GO:0008150,GO:0008152,GO:0009266,GO:0009267,GO:0009408,GO:0009409,GO:0009414,GO:0009415,GO:0009553,GO:0009593,GO:0009605,GO:0009628,GO:0009653,GO:0009787,GO:0009791,GO:0009826,GO:…	-	ko:K04706,ko:K16063,ko:K22403	ko04120,ko04630,ko05160,map04120,map04630,map05160	-	-	-	ko00000,ko00001,ko04121,ko04812	-	-	-	PHD,SAP,zf-MIZ
file_1_file_1_jg13834.t1	3983.cassava4.1_007565m	1.91e-140	417	COG5256@1|root,KOG0052@2759|Eukaryota,37KSK@33090|Viridiplantae,3GAB2@35493|Streptophyta,4JJY5@91835|fabids	35493|Streptophyta	J	This protein promotes the GTP-dependent binding of aminoacyl-tRNA to the A-site of ribosomes during protein biosynthesis	-	-	-	ko:K03231	ko03013,ko05134,map03013,map05134	-	-	-	ko00000,ko00001,ko03012,ko03016,ko03019,ko04131,ko04147	-	-	-	GTP_EFTU,GTP_EFTU_D2,GTP_EFTU_D3
file_1_file_1_jg13834.t2	3983.cassava4.1_007565m	2.28e-140	417	COG5256@1|root,KOG0052@2759|Eukaryota,37KSK@33090|Viridiplantae,3GAB2@35493|Streptophyta,4JJY5@91835|fabids	35493|Streptophyta	J	This protein promotes the GTP-dependent binding of aminoacyl-tRNA to the A-site of ribosomes during protein biosynthesis	-	-	-	ko:K03231	ko03013,ko05134,map03013,map05134	-	-	-	ko00000,ko00001,ko03012,ko03016,ko03019,ko04131,ko04147	-	-	-	GTP_EFTU,GTP_EFTU_D2,GTP_EFTU_D3
file_1_file_1_jg13835.t1	13333.ERN07912	5.95e-110	327	COG5256@1|root,KOG0052@2759|Eukaryota,37KSK@33090|Viridiplantae,3GAB2@35493|Streptophyta	35493|Streptophyta	J	This protein promotes the GTP-dependent binding of aminoacyl-tRNA to the A-site of ribosomes during protein biosynthesis	-	-	-	ko:K03231	ko03013,ko05134,map03013,map05134	-	-	-	ko00000,ko00001,ko03012,ko03016,ko03019,ko04131,ko04147	-	-	-	GTP_EFTU,GTP_EFTU_D2,GTP_EFTU_D3
file_1_file_1_jg13837.t1	71139.XP_010046432.1	3.58e-247	689	2BZUX@1|root,2QRZP@2759|Eukaryota,37NDZ@33090|Viridiplantae,3GEG0@35493|Streptophyta	35493|Streptophyta	S	Vicilin-like antimicrobial peptides	-	GO:0005575,GO:0005911,GO:0006950,GO:0006952,GO:0008150,GO:0009506,GO:0009605,GO:0009607,GO:0009620,GO:0030054,GO:0043207,GO:0050832,GO:0050896,GO:0051704,GO:0051707,GO:0055044,GO:0098542	-	ko:K17815	-	-	-	-	ko00000,ko01000,ko03400	-	-	-	Cupin_1
file_1_file_1_jg13838.t1	71139.XP_010043713.1	2.78e-191	553	KOG4760@1|root,KOG4760@2759|Eukaryota,37M0V@33090|Viridiplantae,3G9FX@35493|Streptophyta	35493|Streptophyta	F	Exonuclease V	-	-	-	ko:K17815	-	-	-	-	ko00000,ko01000,ko03400	-	-	-	Exo5
file_1_file_1_jg13839.t1	71139.XP_010043705.1	1.6e-72	220	COG2030@1|root,KOG1206@2759|Eukaryota,37UNQ@33090|Viridiplantae,3GIMA@35493|Streptophyta	35493|Streptophyta	I	Hydroxyacyl-thioester dehydratase type 2	-	-	2.7.4.3,4.2.1.55	ko:K17865,ko:K18532	ko00230,ko00630,ko00650,ko01100,ko01110,ko01120,ko01130,ko01200,ko03008,map00230,map00630,map00650,map01100,map01110,map01120,map01130,map01200,map03008	M00049,M00373	R00127,R01547,R03027	RC00002,RC00831	ko00000,ko00001,ko00002,ko01000,ko03009	-	-	-	MaoC_dehydratas
file_1_file_1_jg13840.t1	71139.XP_010043703.1	0	2074	28K6K@1|root,2QSM5@2759|Eukaryota,37SX8@33090|Viridiplantae,3G80U@35493|Streptophyta	35493|Streptophyta	S	atrnl,rnl	-	GO:0000003,GO:0000278,GO:0000281,GO:0000394,GO:0000910,GO:0003006,GO:0003674,GO:0003676,GO:0003723,GO:0003729,GO:0003824,GO:0003972,GO:0005488,GO:0005575,GO:0005622,GO:0005623,GO:0005737,GO:0006139,GO:0006388,GO:0006396,GO:0006399,GO:0006725,GO:0006807,GO:0007049,GO:0007275,GO:0008033,GO:0008150,GO:0008152,GO:0008356,GO:0008380,GO:0008452,GO:0009790,GO:0009791,GO:0009793,GO:0009966,GO:0009987,GO:…	-	-	-	-	-	-	-	-	-	-	tRNA_lig_CPD
file_1_file_1_jg13842.t1	71139.XP_010043701.1	6.69e-114	331	28NHN@1|root,2QV36@2759|Eukaryota,37K79@33090|Viridiplantae,3G7JZ@35493|Streptophyta	35493|Streptophyta	S	lob domain-containing protein	-	-	-	-	-	-	-	-	-	-	-	-	LOB
file_1_file_1_jg13843.t1	71139.XP_010043699.1	2.69e-167	470	COG5083@1|root,KOG3668@2759|Eukaryota,37Q6U@33090|Viridiplantae,3GFN8@35493|Streptophyta	35493|Streptophyta	IT	phosphatidylinositol transfer protein	-	GO:0003674,GO:0005215,GO:0005319,GO:0005548,GO:0005575,GO:0005622,GO:0005623,GO:0005737,GO:0005794,GO:0006810,GO:0006811,GO:0006820,GO:0006869,GO:0008150,GO:0008526,GO:0010876,GO:0012505,GO:0015711,GO:0015748,GO:0015914,GO:0033036,GO:0043226,GO:0043227,GO:0043229,GO:0043231,GO:0044424,GO:0044444,GO:0044464,GO:0051179,GO:0051234,GO:0071702,GO:0071944	-	-	-	-	-	-	-	-	-	-	IP_trans
file_1_file_1_jg13844.t1	71139.XP_010043700.1	3.42e-177	496	28IDS@1|root,2QU76@2759|Eukaryota,37SVD@33090|Viridiplantae,3G76Y@35493|Streptophyta	35493|Streptophyta	S	Belongs to the tetraspanin (TM4SF) family	-	-	-	-	-	-	-	-	-	-	-	-	Tetraspannin
file_1_file_1_jg13845.t1	71139.XP_010060337.1	6.12e-60	187	KOG1784@1|root,KOG1784@2759|Eukaryota,37VAG@33090|Viridiplantae,3GJDD@35493|Streptophyta	35493|Streptophyta	A	U6 snRNA-associated Sm-like protein LSm8	-	-	-	ko:K12627	ko03018,ko03040,map03018,map03040	M00354,M00396	-	-	ko00000,ko00001,ko00002,ko03019,ko03041	-	-	-	LSM
file_1_file_2_19389_t	71139.XP_010043695.1	1.17e-311	865	28KMF@1|root,2QT2U@2759|Eukaryota,37KRY@33090|Viridiplantae,3GBNM@35493|Streptophyta	35493|Streptophyta	S	Interactor of constitutive active ROPs	-	GO:0005575,GO:0005623,GO:0005886,GO:0016020,GO:0044464,GO:0071944	-	ko:K10352	ko04530,map04530	-	-	-	ko00000,ko00001,ko04147,ko04812	-	-	-	-
file_1_file_1_jg13846.t1	71139.XP_010043695.1	1e-275	777	28KMF@1|root,2QT2U@2759|Eukaryota,37KRY@33090|Viridiplantae,3GBNM@35493|Streptophyta	35493|Streptophyta	S	Interactor of constitutive active ROPs	-	GO:0005575,GO:0005623,GO:0005886,GO:0016020,GO:0044464,GO:0071944	-	ko:K10352	ko04530,map04530	-	-	-	ko00000,ko00001,ko04147,ko04812	-	-	-	-
file_1_file_1_jg13847.t1	71139.XP_010043694.1	5.89e-181	509	28K3S@1|root,2RB9Y@2759|Eukaryota,37P7U@33090|Viridiplantae,3G9ZJ@35493|Streptophyta	35493|Streptophyta	K	dof zinc finger protein	-	-	-	-	-	-	-	-	-	-	-	-	zf-Dof
file_1_file_1_jg13848.t1	71139.XP_010043691.1	0	1523	COG1269@1|root,KOG2189@2759|Eukaryota,37IDS@33090|Viridiplantae,3G7Z9@35493|Streptophyta	35493|Streptophyta	C	Essential component of the vacuolar proton pump (V- ATPase), a multimeric enzyme that catalyzes the translocation of protons across the membranes. Required for assembly and activity of the V-ATPase	-	GO:0000139,GO:0000325,GO:0003674,GO:0003824,GO:0005215,GO:0005488,GO:0005515,GO:0005575,GO:0005622,GO:0005623,GO:0005737,GO:0005768,GO:0005773,GO:0005774,GO:0005794,GO:0005798,GO:0005802,GO:0006139,GO:0006163,GO:0006164,GO:0006725,GO:0006753,GO:0006754,GO:0006793,GO:0006796,GO:0006807,GO:0006810,GO:0006811,GO:0006812,GO:0006873,GO:0006885,GO:0007035,GO:0008150,GO:0008152,GO:0008324,GO:0009058,GO:…	-	ko:K02154	ko00190,ko01100,ko04142,ko04145,ko04721,ko04966,ko05110,ko05120,ko05152,ko05165,ko05323,map00190,map01100,map04142,map04145,map04721,map04966,map05110,map05120,map05152,map05165,map05323	M00160	-	-	ko00000,ko00001,ko00002,ko04147	3.A.2.2	-	-	V_ATPase_I
file_1_file_1_jg13849.t1	71139.XP_010043689.1	0	1169	2CSYQ@1|root,2RDVU@2759|Eukaryota,37TID@33090|Viridiplantae,3GFSU@35493|Streptophyta	35493|Streptophyta	-	-	-	-	-	-	-	-	-	-	-	-	-	-	-
file_1_file_1_jg13850.t1	71139.XP_010043689.1	7.83e-259	753	2CSYQ@1|root,2RDVU@2759|Eukaryota,37TID@33090|Viridiplantae,3GFSU@35493|Streptophyta	35493|Streptophyta	-	-	-	-	-	-	-	-	-	-	-	-	-	-	-
file_1_file_2_19394_t	71139.XP_010043689.1	7.53e-259	753	2CSYQ@1|root,2RDVU@2759|Eukaryota,37TID@33090|Viridiplantae,3GFSU@35493|Streptophyta	35493|Streptophyta	-	-	-	-	-	-	-	-	-	-	-	-	-	-	-
file_1_file_1_jg13851.t1	71139.XP_010037532.1	1.13e-77	258	28P4F@1|root,2QVR4@2759|Eukaryota,37HW3@33090|Viridiplantae,3G8NH@35493|Streptophyta	35493|Streptophyta	S	isoform X1	-	GO:0000245,GO:0000375,GO:0000377,GO:0000381,GO:0000398,GO:0003674,GO:0003676,GO:0003723,GO:0003729,GO:0005488,GO:0005575,GO:0005622,GO:0005623,GO:0005634,GO:0006139,GO:0006396,GO:0006397,GO:0006725,GO:0006807,GO:0008150,GO:0008152,GO:0008380,GO:0009987,GO:0010467,GO:0010468,GO:0010941,GO:0010942,GO:0016043,GO:0016070,GO:0016071,GO:0019219,GO:0019222,GO:0022607,GO:0022613,GO:0022618,GO:0031323,GO:…	-	-	-	-	-	-	-	-	-	-	G-patch
file_1_file_1_jg13852.t1	71139.XP_010033776.1	0	1085	KOG4197@1|root,KOG4197@2759|Eukaryota,37TDG@33090|Viridiplantae,3GAVJ@35493|Streptophyta	35493|Streptophyta	S	Pentatricopeptide repeat-containing protein	-	GO:0003674,GO:0003676,GO:0003723,GO:0003824,GO:0004518,GO:0004519,GO:0005488,GO:0005575,GO:0005622,GO:0005623,GO:0006139,GO:0006725,GO:0006807,GO:0008150,GO:0008152,GO:0009451,GO:0009987,GO:0016070,GO:0016787,GO:0016788,GO:0034641,GO:0043170,GO:0043226,GO:0043227,GO:0043229,GO:0043231,GO:0043412,GO:0044237,GO:0044238,GO:0044424,GO:0044464,GO:0046483,GO:0071704,GO:0090304,GO:0090305,GO:0097159,GO:…	-	-	-	-	-	-	-	-	-	-	PPR,PPR_2
file_1_file_1_jg13853.t1	71139.XP_010043680.1	0	1424	COG5175@1|root,KOG2068@2759|Eukaryota,37QZV@33090|Viridiplantae,3GEQV@35493|Streptophyta	35493|Streptophyta	A	RNA binding (RRM RBD RNP motifs) family protein	-	GO:0000075,GO:0000077,GO:0000278,GO:0000288,GO:0000289,GO:0000956,GO:0002682,GO:0003674,GO:0003824,GO:0004842,GO:0005575,GO:0005622,GO:0005623,GO:0005737,GO:0005829,GO:0006139,GO:0006401,GO:0006402,GO:0006464,GO:0006508,GO:0006511,GO:0006725,GO:0006807,GO:0006950,GO:0006974,GO:0006977,GO:0007049,GO:0007093,GO:0007154,GO:0007165,GO:0007346,GO:0008150,GO:0008152,GO:0009056,GO:0009057,GO:0009892,GO:…	2.3.2.27	ko:K10643	ko03018,map03018	-	-	-	ko00000,ko00001,ko01000,ko03019,ko04121	-	-	-	RRM_1,zf-RING_4
file_1_file_1_jg13853.t2	71139.XP_010043680.1	0	1447	COG5175@1|root,KOG2068@2759|Eukaryota,37QZV@33090|Viridiplantae,3GEQV@35493|Streptophyta	35493|Streptophyta	A	RNA binding (RRM RBD RNP motifs) family protein	-	GO:0000075,GO:0000077,GO:0000278,GO:0000288,GO:0000289,GO:0000956,GO:0002682,GO:0003674,GO:0003824,GO:0004842,GO:0005575,GO:0005622,GO:0005623,GO:0005737,GO:0005829,GO:0006139,GO:0006401,GO:0006402,GO:0006464,GO:0006508,GO:0006511,GO:0006725,GO:0006807,GO:0006950,GO:0006974,GO:0006977,GO:0007049,GO:0007093,GO:0007154,GO:0007165,GO:0007346,GO:0008150,GO:0008152,GO:0009056,GO:0009057,GO:0009892,GO:…	2.3.2.27	ko:K10643	ko03018,map03018	-	-	-	ko00000,ko00001,ko01000,ko03019,ko04121	-	-	-	RRM_1,zf-RING_4
file_1_file_2_19399_t	71139.XP_010043680.1	0	940	COG5175@1|root,KOG2068@2759|Eukaryota,37QZV@33090|Viridiplantae,3GEQV@35493|Streptophyta	35493|Streptophyta	A	RNA binding (RRM RBD RNP motifs) family protein	-	GO:0000075,GO:0000077,GO:0000278,GO:0000288,GO:0000289,GO:0000956,GO:0002682,GO:0003674,GO:0003824,GO:0004842,GO:0005575,GO:0005622,GO:0005623,GO:0005737,GO:0005829,GO:0006139,GO:0006401,GO:0006402,GO:0006464,GO:0006508,GO:0006511,GO:0006725,GO:0006807,GO:0006950,GO:0006974,GO:0006977,GO:0007049,GO:0007093,GO:0007154,GO:0007165,GO:0007346,GO:0008150,GO:0008152,GO:0009056,GO:0009057,GO:0009892,GO:…	2.3.2.27	ko:K10643	ko03018,map03018	-	-	-	ko00000,ko00001,ko01000,ko03019,ko04121	-	-	-	RRM_1,zf-RING_4
file_1_file_1_jg13854.t1	71139.XP_010043686.1	4.33e-274	759	28UNB@1|root,2R1D7@2759|Eukaryota,37IQU@33090|Viridiplantae,3G7Q2@35493|Streptophyta	35493|Streptophyta	K	Transcription factor	-	-	-	ko:K09284	-	-	-	-	ko00000,ko03000	-	-	-	AP2
file_1_file_1_jg13856.t1	71139.XP_010043672.1	2.04e-239	661	COG0468@1|root,KOG1433@2759|Eukaryota,37MU3@33090|Viridiplantae,3GH6W@35493|Streptophyta	35493|Streptophyta	L	DNA repair protein RAD51 homolog	-	GO:0000003,GO:0000150,GO:0000217,GO:0000280,GO:0000400,GO:0000707,GO:0000724,GO:0000725,GO:0000730,GO:0003674,GO:0003676,GO:0003677,GO:0003690,GO:0003697,GO:0003824,GO:0005488,GO:0005575,GO:0005622,GO:0005623,GO:0005634,GO:0005657,GO:0005694,GO:0006139,GO:0006259,GO:0006281,GO:0006302,GO:0006310,GO:0006312,GO:0006725,GO:0006807,GO:0006950,GO:0006974,GO:0006996,GO:0007049,GO:0007127,GO:0007131,GO:…	-	ko:K10869	ko03440,map03440	-	-	-	ko00000,ko00001,ko03400	-	-	-	Rad51
file_1_file_1_jg13857.t1	3641.EOY34260	1.9e-10	58.5	2E6KH@1|root,2SD9T@2759|Eukaryota,37XPW@33090|Viridiplantae,3GMUV@35493|Streptophyta	35493|Streptophyta	-	-	-	-	-	-	-	-	-	-	-	-	-	-	-
file_1_file_1_jg13859.t1	3641.EOY34257	0.000165	43.5	2E8YK@1|root,2SFD1@2759|Eukaryota	2759|Eukaryota	-	-	-	-	-	-	-	-	-	-	-	-	-	-	-
file_1_file_1_jg13860.t1	71139.XP_010043655.1	7.69e-231	640	COG0647@1|root,KOG1618@2759|Eukaryota,37R1D@33090|Viridiplantae,3GFBV@35493|Streptophyta	35493|Streptophyta	G	Hydrolase family protein HAD-superfamily	-	-	-	-	-	-	-	-	-	-	-	-	Hydrolase_6,Hydrolase_like
file_1_file_1_jg13861.t1	71139.XP_010057660.1	2.02e-227	632	COG0604@1|root,KOG0025@2759|Eukaryota,37N9E@33090|Viridiplantae,3GC83@35493|Streptophyta	35493|Streptophyta	CK	trans-2-enoyl-CoA reductase, mitochondrial	-	GO:0000166,GO:0003674,GO:0005488,GO:0005507,GO:0005524,GO:0005575,GO:0005622,GO:0005623,GO:0005634,GO:0005737,GO:0005739,GO:0008144,GO:0009507,GO:0009536,GO:0017076,GO:0030554,GO:0032553,GO:0032555,GO:0032559,GO:0035639,GO:0036094,GO:0043167,GO:0043168,GO:0043169,GO:0043226,GO:0043227,GO:0043229,GO:0043231,GO:0044424,GO:0044444,GO:0044464,GO:0046872,GO:0046914,GO:0097159,GO:0097367,GO:1901265,GO:…	1.3.1.38	ko:K07512	ko00062,ko01100,ko01212,map00062,map01100,map01212	M00085	R01278,R03776,R03856,R03989,R04753,R06985,R07162	RC00052	ko00000,ko00001,ko00002,ko01000	-	-	-	ADH_N,ADH_zinc_N
file_1_file_2_19407_t	71139.XP_010057660.1	1.21e-216	604	COG0604@1|root,KOG0025@2759|Eukaryota,37N9E@33090|Viridiplantae,3GC83@35493|Streptophyta	35493|Streptophyta	CK	trans-2-enoyl-CoA reductase, mitochondrial	-	GO:0000166,GO:0003674,GO:0005488,GO:0005507,GO:0005524,GO:0005575,GO:0005622,GO:0005623,GO:0005634,GO:0005737,GO:0005739,GO:0008144,GO:0009507,GO:0009536,GO:0017076,GO:0030554,GO:0032553,GO:0032555,GO:0032559,GO:0035639,GO:0036094,GO:0043167,GO:0043168,GO:0043169,GO:0043226,GO:0043227,GO:0043229,GO:0043231,GO:0044424,GO:0044444,GO:0044464,GO:0046872,GO:0046914,GO:0097159,GO:0097367,GO:1901265,GO:…	1.3.1.38	ko:K07512	ko00062,ko01100,ko01212,map00062,map01100,map01212	M00085	R01278,R03776,R03856,R03989,R04753,R06985,R07162	RC00052	ko00000,ko00001,ko00002,ko01000	-	-	-	ADH_N,ADH_zinc_N
file_1_file_1_jg13862.t1	71139.XP_010043650.1	4.91e-249	689	COG0515@1|root,KOG1187@2759|Eukaryota,37RHK@33090|Viridiplantae,3GBP6@35493|Streptophyta	35493|Streptophyta	T	belongs to the protein kinase superfamily	-	GO:0003674,GO:0003824,GO:0004672,GO:0004674,GO:0004675,GO:0004888,GO:0005575,GO:0005623,GO:0005886,GO:0006464,GO:0006468,GO:0006793,GO:0006796,GO:0006807,GO:0007154,GO:0007165,GO:0007166,GO:0007167,GO:0007178,GO:0008150,GO:0008152,GO:0009987,GO:0016020,GO:0016301,GO:0016310,GO:0016740,GO:0016772,GO:0016773,GO:0019199,GO:0019538,GO:0023052,GO:0036211,GO:0038023,GO:0043170,GO:0043412,GO:0044237,GO:…	-	ko:K18873	ko04626,map04626	-	-	-	ko00000,ko00001	-	-	-	Pkinase,Pkinase_Tyr
file_1_file_1_jg13863.t1	71139.XP_010046421.1	6.02e-112	327	2E0FZ@1|root,2S7WH@2759|Eukaryota,37WTD@33090|Viridiplantae,3GM28@35493|Streptophyta	35493|Streptophyta	-	-	-	-	-	-	-	-	-	-	-	-	-	-	-
file_1_file_1_jg13864.t1	71139.XP_010046420.1	0	883	KOG2246@1|root,KOG2246@2759|Eukaryota,37QNU@33090|Viridiplantae,3GBGY@35493|Streptophyta	35493|Streptophyta	G	Glycosyltransferase-like protein	-	-	-	-	-	-	-	-	-	-	-	-	DUF604
file_1_file_1_jg13865.t1	71139.XP_010043649.1	0	892	2C82H@1|root,2QPNN@2759|Eukaryota,37I39@33090|Viridiplantae,3GDTR@35493|Streptophyta	35493|Streptophyta	S	BTB POZ domain-containing protein	-	-	-	-	-	-	-	-	-	-	-	-	-
file_1_file_1_jg13866.t1	71139.XP_010046419.1	1.77e-191	534	28NPJ@1|root,2QT2P@2759|Eukaryota,37T7B@33090|Viridiplantae,3GXCU@35493|Streptophyta	35493|Streptophyta	G	Belongs to the glycosyl hydrolase 18 family	-	-	-	-	-	-	-	-	-	-	-	-	Glyco_hydro_18
file_1_file_1_jg13867.t1	71139.XP_010043648.1	2.91e-116	350	COG2132@1|root,KOG1263@2759|Eukaryota,37KZ3@33090|Viridiplantae,3GAGG@35493|Streptophyta	35493|Streptophyta	Q	Lignin degradation and detoxification of lignin-derived products	-	GO:0003674,GO:0003824,GO:0006725,GO:0008150,GO:0008152,GO:0009058,GO:0009698,GO:0009699,GO:0009808,GO:0009809,GO:0009987,GO:0016491,GO:0016722,GO:0019438,GO:0019748,GO:0044237,GO:0044249,GO:0044550,GO:0055114,GO:0071704,GO:1901360,GO:1901362,GO:1901576	1.10.3.2	ko:K05909	-	-	-	-	ko00000,ko01000	-	-	-	Cu-oxidase,Cu-oxidase_2,Cu-oxidase_3
file_1_file_2_19413_t	71139.XP_010043648.1	8.29e-55	186	COG2132@1|root,KOG1263@2759|Eukaryota,37KZ3@33090|Viridiplantae,3GAGG@35493|Streptophyta	35493|Streptophyta	Q	Lignin degradation and detoxification of lignin-derived products	-	GO:0003674,GO:0003824,GO:0006725,GO:0008150,GO:0008152,GO:0009058,GO:0009698,GO:0009699,GO:0009808,GO:0009809,GO:0009987,GO:0016491,GO:0016722,GO:0019438,GO:0019748,GO:0044237,GO:0044249,GO:0044550,GO:0055114,GO:0071704,GO:1901360,GO:1901362,GO:1901576	1.10.3.2	ko:K05909	-	-	-	-	ko00000,ko01000	-	-	-	Cu-oxidase,Cu-oxidase_2,Cu-oxidase_3
file_1_file_2_19414_t	71139.XP_010043646.1	3.92e-102	299	2CXNK@1|root,2RYQN@2759|Eukaryota,37U67@33090|Viridiplantae,3GHYB@35493|Streptophyta	35493|Streptophyta	S	Embryo-specific protein 3, (ATS3)	-	-	-	-	-	-	-	-	-	-	-	-	ATS3
file_1_file_1_jg13868.t1	71139.XP_010043646.1	1.32e-94	280	2CXNK@1|root,2RYQN@2759|Eukaryota,37U67@33090|Viridiplantae,3GHYB@35493|Streptophyta	35493|Streptophyta	S	Embryo-specific protein 3, (ATS3)	-	-	-	-	-	-	-	-	-	-	-	-	ATS3
file_1_file_1_jg13869.t2	71139.XP_010043642.1	4.86e-36	126	2E2E8@1|root,2S9N3@2759|Eukaryota,37WNF@33090|Viridiplantae,3GKY6@35493|Streptophyta	35493|Streptophyta	-	-	-	-	-	-	-	-	-	-	-	-	-	-	-
file_1_file_1_jg13869.t1	71139.XP_010043642.1	7.13e-74	223	2E2E8@1|root,2S9N3@2759|Eukaryota,37WNF@33090|Viridiplantae,3GKY6@35493|Streptophyta	35493|Streptophyta	-	-	-	-	-	-	-	-	-	-	-	-	-	-	-
file_1_file_1_jg13870.t1	71139.XP_010046418.1	5.63e-52	172	28MZX@1|root,2S13K@2759|Eukaryota,37VCP@33090|Viridiplantae,3GIZD@35493|Streptophyta	35493|Streptophyta	K	wuschel-related homeobox	-	GO:0000003,GO:0003002,GO:0003006,GO:0003674,GO:0003700,GO:0005575,GO:0005622,GO:0005623,GO:0005634,GO:0006355,GO:0007275,GO:0007389,GO:0008150,GO:0008283,GO:0009791,GO:0009798,GO:0009889,GO:0009908,GO:0009943,GO:0009947,GO:0009955,GO:0010468,GO:0010556,GO:0010865,GO:0019219,GO:0019222,GO:0022414,GO:0031323,GO:0031326,GO:0032501,GO:0032502,GO:0043226,GO:0043227,GO:0043229,GO:0043231,GO:0044424,GO:…	-	-	-	-	-	-	-	-	-	-	Homeobox
file_1_file_1_jg13871.t1	71139.XP_010043640.1	0	2332	KOG1927@1|root,KOG1927@2759|Eukaryota,37KKC@33090|Viridiplantae,3GGQX@35493|Streptophyta	35493|Streptophyta	K	protease binding	-	GO:0000228,GO:0000785,GO:0000790,GO:0002020,GO:0003674,GO:0005488,GO:0005515,GO:0005575,GO:0005622,GO:0005623,GO:0005634,GO:0005694,GO:0019899,GO:0031011,GO:0031974,GO:0031981,GO:0032991,GO:0033202,GO:0043226,GO:0043227,GO:0043228,GO:0043229,GO:0043231,GO:0043232,GO:0043233,GO:0044422,GO:0044424,GO:0044427,GO:0044428,GO:0044446,GO:0044454,GO:0044464,GO:0070013,GO:0070603,GO:0097346,GO:1902494,GO:…	-	ko:K11671	-	-	-	-	ko00000,ko03036	-	-	-	-
file_1_file_1_jg13872.t1	71139.XP_010043639.1	0	1770	COG5059@1|root,KOG0243@2759|Eukaryota,37NTB@33090|Viridiplantae,3GAER@35493|Streptophyta	35493|Streptophyta	Z	Belongs to the TRAFAC class myosin-kinesin ATPase superfamily. Kinesin family	-	GO:0000226,GO:0000278,GO:0000281,GO:0000902,GO:0000910,GO:0000911,GO:0003674,GO:0003774,GO:0003777,GO:0003824,GO:0005575,GO:0005622,GO:0005623,GO:0005819,GO:0005856,GO:0005871,GO:0005874,GO:0005875,GO:0005886,GO:0006928,GO:0006996,GO:0007010,GO:0007017,GO:0007018,GO:0007049,GO:0007051,GO:0007052,GO:0008150,GO:0008574,GO:0009653,GO:0009826,GO:0009987,GO:0015630,GO:0016020,GO:0016043,GO:0016049,GO:…	-	ko:K10398	-	-	-	-	ko00000,ko03036,ko04812	-	-	-	Kinesin
file_1_file_1_jg13873.t1	29730.Gorai.003G138500.1	1.82e-145	417	28NPJ@1|root,2QW05@2759|Eukaryota,37T89@33090|Viridiplantae,3G9TI@35493|Streptophyta	35493|Streptophyta	G	Belongs to the glycosyl hydrolase 18 family	-	-	-	-	-	-	-	-	-	-	-	-	Glyco_hydro_18
file_1_file_1_jg13874.t1	71139.XP_010043634.1	0	1914	COG0474@1|root,KOG0202@2759|Eukaryota,37JIJ@33090|Viridiplantae,3GDH0@35493|Streptophyta	35493|Streptophyta	P	Belongs to the cation transport ATPase (P-type) (TC 3.A.3) family	ECA1	GO:0003674,GO:0003824,GO:0005215,GO:0005388,GO:0005575,GO:0005622,GO:0005623,GO:0005737,GO:0005773,GO:0005774,GO:0005783,GO:0005789,GO:0005886,GO:0006810,GO:0006811,GO:0006812,GO:0006816,GO:0008150,GO:0008324,GO:0010035,GO:0010038,GO:0010042,GO:0012505,GO:0015075,GO:0015085,GO:0015318,GO:0015399,GO:0015405,GO:0015662,GO:0016020,GO:0016021,GO:0016462,GO:0016787,GO:0016817,GO:0016818,GO:0016887,GO:…	3.6.3.8	ko:K01537	-	-	-	-	ko00000,ko01000	3.A.3.2	-	-	Cation_ATPase,Cation_ATPase_C,Cation_ATPase_N,E1-E2_ATPase,Hydrolase,Hydrolase_3
file_1_file_1_jg13877.t1	71139.XP_010039667.1	1.31e-64	199	2CGFG@1|root,2S3NQ@2759|Eukaryota,37VYD@33090|Viridiplantae,3GM6Q@35493|Streptophyta	35493|Streptophyta	-	-	-	-	-	-	-	-	-	-	-	-	-	-	-
file_1_file_1_jg13878.t1	2711.XP_006488232.1	0	972	COG0515@1|root,KOG1187@2759|Eukaryota,37M3Z@33090|Viridiplantae,3GBWT@35493|Streptophyta	35493|Streptophyta	T	belongs to the protein kinase superfamily	-	GO:0000902,GO:0003674,GO:0003824,GO:0004672,GO:0005575,GO:0005623,GO:0005886,GO:0005911,GO:0006464,GO:0006468,GO:0006793,GO:0006796,GO:0006807,GO:0008150,GO:0008152,GO:0009506,GO:0009653,GO:0009719,GO:0009725,GO:0009741,GO:0009826,GO:0009987,GO:0010033,GO:0014070,GO:0016020,GO:0016043,GO:0016049,GO:0016301,GO:0016310,GO:0016740,GO:0016772,GO:0016773,GO:0019538,GO:0030054,GO:0032502,GO:0032989,GO:…	-	ko:K13435	ko04626,map04626	-	-	-	ko00000,ko00001,ko01001	-	-	-	Malectin_like,Pkinase_Tyr
file_1_file_1_jg13879.t1	71139.XP_010043607.1	1.6e-87	274	28PAB@1|root,2QVXJ@2759|Eukaryota,37QS9@33090|Viridiplantae,3GEVM@35493|Streptophyta	35493|Streptophyta	S	LRR receptor-like serine threonine-protein kinase	-	-	-	-	-	-	-	-	-	-	-	-	LRR_4,LRR_8,Malectin_like
file_1_file_1_jg13880.t1	71139.XP_010043607.1	4.57e-88	276	28PAB@1|root,2QVXJ@2759|Eukaryota,37QS9@33090|Viridiplantae,3GEVM@35493|Streptophyta	35493|Streptophyta	S	LRR receptor-like serine threonine-protein kinase	-	-	-	-	-	-	-	-	-	-	-	-	LRR_4,LRR_8,Malectin_like
file_1_file_1_jg13881.t1	71139.XP_010043607.1	4.19e-102	314	28PAB@1|root,2QVXJ@2759|Eukaryota,37QS9@33090|Viridiplantae,3GEVM@35493|Streptophyta	35493|Streptophyta	S	LRR receptor-like serine threonine-protein kinase	-	-	-	-	-	-	-	-	-	-	-	-	LRR_4,LRR_8,Malectin_like
file_1_file_1_jg13882.t1	3983.cassava4.1_027336m	6.96e-171	513	28PAB@1|root,2QVXJ@2759|Eukaryota,37QS9@33090|Viridiplantae,3GEVM@35493|Streptophyta,4JFMY@91835|fabids	35493|Streptophyta	S	Carbohydrate-binding protein of the ER	-	-	-	-	-	-	-	-	-	-	-	-	Malectin_like
file_1_file_1_jg13883.t1	29760.VIT_06s0004g03960.t01	7.88e-87	289	2CMSM@1|root,2QRRJ@2759|Eukaryota,37TN1@33090|Viridiplantae,3GGUD@35493|Streptophyta	35493|Streptophyta	-	-	-	-	-	-	-	-	-	-	-	-	-	-	Malectin_like
file_1_file_1_jg13884.t1	2711.XP_006488232.1	1.17e-114	361	COG0515@1|root,KOG1187@2759|Eukaryota,37M3Z@33090|Viridiplantae,3GBWT@35493|Streptophyta	35493|Streptophyta	T	belongs to the protein kinase superfamily	-	GO:0000902,GO:0003674,GO:0003824,GO:0004672,GO:0005575,GO:0005623,GO:0005886,GO:0005911,GO:0006464,GO:0006468,GO:0006793,GO:0006796,GO:0006807,GO:0008150,GO:0008152,GO:0009506,GO:0009653,GO:0009719,GO:0009725,GO:0009741,GO:0009826,GO:0009987,GO:0010033,GO:0014070,GO:0016020,GO:0016043,GO:0016049,GO:0016301,GO:0016310,GO:0016740,GO:0016772,GO:0016773,GO:0019538,GO:0030054,GO:0032502,GO:0032989,GO:…	-	ko:K13435	ko04626,map04626	-	-	-	ko00000,ko00001,ko01001	-	-	-	Malectin_like,Pkinase_Tyr
file_1_file_1_jg13885.t1	29760.VIT_06s0004g03960.t01	1.36e-34	136	2CMSM@1|root,2QRRJ@2759|Eukaryota,37TN1@33090|Viridiplantae,3GGUD@35493|Streptophyta	35493|Streptophyta	-	-	-	-	-	-	-	-	-	-	-	-	-	-	Malectin_like
file_1_file_1_jg13886.t1	71139.XP_010037101.1	0	920	COG2124@1|root,KOG0156@2759|Eukaryota,37TAF@33090|Viridiplantae,3GD8M@35493|Streptophyta	35493|Streptophyta	Q	cytochrome P450	-	-	-	ko:K20618	-	-	-	-	ko00000,ko00199	-	-	-	p450
file_1_file_1_jg13887.t1	71139.XP_010043606.1	1.09e-195	568	COG0666@1|root,KOG0504@2759|Eukaryota,37HUN@33090|Viridiplantae,3G7GD@35493|Streptophyta	35493|Streptophyta	S	ankyrin repeat-containing protein	-	-	-	-	-	-	-	-	-	-	-	-	Ank_2,Ank_3,Ank_4,Ank_5,PGG
file_1_file_1_jg13888.t1	71139.XP_010043605.1	0	845	COG3424@1|root,2QPV6@2759|Eukaryota,37IKC@33090|Viridiplantae,3GAQR@35493|Streptophyta	35493|Streptophyta	I	3-ketoacyl-coa synthase	KCS3	GO:0005575,GO:0005622,GO:0005623,GO:0005737,GO:0005783,GO:0006950,GO:0008150,GO:0009266,GO:0009314,GO:0009409,GO:0009416,GO:0009628,GO:0012505,GO:0043226,GO:0043227,GO:0043229,GO:0043231,GO:0044424,GO:0044444,GO:0044464,GO:0050896	2.3.1.199	ko:K15397	ko00062,ko01110,map00062,map01110	M00415	R09419,R10825	RC00004,RC02888,RC02997	ko00000,ko00001,ko00002,ko01000	-	-	-	ACP_syn_III_C,FAE1_CUT1_RppA
file_1_file_1_jg13889.t1	71139.XP_010043604.1	0	974	KOG2344@1|root,KOG2344@2759|Eukaryota,37KJU@33090|Viridiplantae,3GDWE@35493|Streptophyta	35493|Streptophyta	U	exocyst complex component	-	GO:0000145,GO:0001505,GO:0003674,GO:0005488,GO:0005515,GO:0005543,GO:0005546,GO:0005575,GO:0005622,GO:0005623,GO:0005737,GO:0005938,GO:0006810,GO:0006836,GO:0006887,GO:0006903,GO:0006904,GO:0007154,GO:0007267,GO:0007268,GO:0007269,GO:0008013,GO:0008150,GO:0008289,GO:0009987,GO:0016079,GO:0016080,GO:0016081,GO:0016192,GO:0017156,GO:0022406,GO:0023052,GO:0023061,GO:0032940,GO:0032991,GO:0035091,GO:…	-	ko:K07195	ko04910,map04910	-	-	-	ko00000,ko00001,ko03036,ko04131	-	-	-	Exo70
file_1_file_1_jg13890.t1	71139.XP_010043601.1	1.42e-144	411	KOG1603@1|root,KOG1603@2759|Eukaryota,37V1A@33090|Viridiplantae,3GHDR@35493|Streptophyta	35493|Streptophyta	P	heavy metal-associated domain containing protein, expressed	-	-	-	-	-	-	-	-	-	-	-	-	HMA
file_1_file_1_jg13891.t1	71139.XP_010043602.1	0	896	COG2124@1|root,KOG0156@2759|Eukaryota,37QY3@33090|Viridiplantae,3GHDP@35493|Streptophyta	35493|Streptophyta	Q	Belongs to the cytochrome P450 family	-	-	1.14.14.1	ko:K07408,ko:K14985	ko00140,ko00380,ko00830,ko00980,ko00981,ko01100,ko04913,ko05204,map00140,map00380,map00830,map00980,map00981,map01100,map04913,map05204	-	R02354,R02355,R03089,R03408,R03629,R07000,R07001,R07021,R07022,R07079,R07080,R07081,R07085,R07087,R07098,R07099,R08143,R08390,R08392,R09418,R09423,R09442	RC00046,RC00661,RC00704,RC00723,RC00724,RC01444,RC01445,RC01693,RC01727,RC01732,RC01733,RC02531	ko00000,ko00001,ko00199,ko01000	-	-	-	p450
file_1_file_1_jg13893.t1	71139.XP_010043597.1	4.64e-171	493	28NWU@1|root,2R3H5@2759|Eukaryota,37R77@33090|Viridiplantae,3GFMF@35493|Streptophyta	35493|Streptophyta	S	Protein of unknown function (DUF1635)	-	-	-	-	-	-	-	-	-	-	-	-	DUF1635
file_1_file_1_jg13894.t1	71139.XP_010042712.1	2.87e-169	474	COG0580@1|root,KOG0223@2759|Eukaryota,37HHG@33090|Viridiplantae,3GA6H@35493|Streptophyta	35493|Streptophyta	G	Belongs to the MIP aquaporin (TC 1.A.8) family	-	GO:0000325,GO:0003674,GO:0005215,GO:0005372,GO:0005575,GO:0005622,GO:0005623,GO:0005737,GO:0005773,GO:0005774,GO:0005886,GO:0005887,GO:0006810,GO:0006811,GO:0006833,GO:0008150,GO:0009705,GO:0015204,GO:0015250,GO:0015267,GO:0015318,GO:0015840,GO:0016020,GO:0016021,GO:0019755,GO:0022803,GO:0022838,GO:0022857,GO:0031090,GO:0031224,GO:0031226,GO:0034220,GO:0042044,GO:0042807,GO:0042886,GO:0042887,GO:…	-	ko:K09873	-	-	-	-	ko00000,ko02000	1.A.8.10	-	-	MIP
file_1_file_1_jg13895.t1	71139.XP_010043595.1	6.33e-140	397	COG5198@1|root,KOG3187@2759|Eukaryota,37NYI@33090|Viridiplantae,3G8CN@35493|Streptophyta	35493|Streptophyta	I	Catalyzes the third of the four reactions of the long- chain fatty acids elongation cycle. This endoplasmic reticulum- bound enzymatic process, allows the addition of two carbons to the chain of long- and very long-chain fatty acids VLCFAs per cycle. This enzyme catalyzes the dehydration of the 3-hydroxyacyl-CoA intermediate into trans-2,3-enoyl-CoA, within each cycle of fatty acid elongation. Th…	-	-	4.2.1.134	ko:K10703	ko00062,ko01040,ko01110,ko01212,map00062,map01040,map01110,map01212	M00415	R07760,R10827	RC00770,RC01095	ko00000,ko00001,ko00002,ko01000,ko01004	-	-	-	PTPLA
file_1_file_1_jg13896.t1	71139.XP_010043594.1	1.98e-133	383	COG5147@1|root,KOG0048@2759|Eukaryota,37S61@33090|Viridiplantae,3GD07@35493|Streptophyta	35493|Streptophyta	K	Transcription factor	-	GO:0000981,GO:0000988,GO:0000989,GO:0001067,GO:0001076,GO:0001101,GO:0001134,GO:0001135,GO:0003674,GO:0003676,GO:0003677,GO:0003700,GO:0005488,GO:0005575,GO:0005622,GO:0005623,GO:0005634,GO:0006355,GO:0006357,GO:0008150,GO:0009719,GO:0009723,GO:0009725,GO:0009739,GO:0009751,GO:0009753,GO:0009889,GO:0009987,GO:0010033,GO:0010035,GO:0010038,GO:0010200,GO:0010243,GO:0010468,GO:0010556,GO:0014070,GO:…	-	ko:K09422	-	-	-	-	ko00000,ko03000	-	-	-	Myb_DNA-binding
file_1_file_1_jg13897.t1	71139.XP_010043592.1	7.92e-226	631	28KVF@1|root,2QUB8@2759|Eukaryota,37NZ5@33090|Viridiplantae,3G72I@35493|Streptophyta	35493|Streptophyta	S	Protein UPSTREAM OF	-	-	-	-	-	-	-	-	-	-	-	-	DUF966
file_1_file_1_jg13898.t1	71139.XP_010026342.1	4.66e-49	171	KOG2390@1|root,KOG2390@2759|Eukaryota	2759|Eukaryota	DKL	positive regulation of glutamate neurotransmitter secretion in response to membrane depolarization	-	-	-	ko:K18270	-	-	-	-	ko00000,ko04131,ko04147	-	-	-	Rab3-GTPase_cat
file_1_file_1_jg13899.t1	71139.XP_010043580.1	1.19e-134	386	KOG0533@1|root,KOG0533@2759|Eukaryota,37PB4@33090|Viridiplantae,3GGKC@35493|Streptophyta	35493|Streptophyta	A	THO complex subunit	-	-	-	ko:K12881	ko03013,ko03015,ko03040,ko05168,map03013,map03015,map03040,map05168	M00406,M00430	-	-	ko00000,ko00001,ko00002,ko03019,ko03041	-	-	-	FoP_duplication,RRM_1
file_1_file_1_jg13901.t1	71139.XP_010043579.1	4.34e-240	662	2CBVF@1|root,2QW6I@2759|Eukaryota,37MUU@33090|Viridiplantae,3G7BV@35493|Streptophyta	35493|Streptophyta	-	-	-	-	-	-	-	-	-	-	-	-	-	-	-
file_1_file_1_jg13903.t1	71139.XP_010043578.1	3.29e-280	768	28H7C@1|root,2QPK3@2759|Eukaryota,37I64@33090|Viridiplantae,3G8E0@35493|Streptophyta	35493|Streptophyta	S	ACT domain-containing protein	-	-	-	-	-	-	-	-	-	-	-	-	ACT
file_1_file_1_jg13904.t1	71139.XP_010043574.1	4.79e-249	683	COG0451@1|root,KOG1429@2759|Eukaryota,37JFJ@33090|Viridiplantae,3G821@35493|Streptophyta	35493|Streptophyta	GM	udp-glucuronic acid decarboxylase	UXS5	GO:0000166,GO:0003674,GO:0003824,GO:0005488,GO:0005515,GO:0005575,GO:0005622,GO:0005623,GO:0005737,GO:0005829,GO:0005886,GO:0005975,GO:0005996,GO:0008150,GO:0008152,GO:0009987,GO:0016020,GO:0016043,GO:0016829,GO:0016830,GO:0016831,GO:0019321,GO:0022607,GO:0036094,GO:0042732,GO:0042802,GO:0042803,GO:0043167,GO:0043168,GO:0043933,GO:0044085,GO:0044238,GO:0044281,GO:0044424,GO:0044444,GO:0044464,GO:…	4.1.1.35	ko:K08678	ko00520,ko01100,map00520,map01100	M00361	R01384	RC00508	ko00000,ko00001,ko00002,ko01000	-	-	-	GDP_Man_Dehyd
file_1_file_1_jg13905.t1	71139.XP_010046403.1	0	1236	28KAA@1|root,2QSR1@2759|Eukaryota,37NQ8@33090|Viridiplantae,3GF8M@35493|Streptophyta	35493|Streptophyta	S	Fusaric acid resistance protein-like	-	-	-	-	-	-	-	-	-	-	-	-	FUSC_2
file_1_file_1_jg13906.t1	71139.XP_010043571.1	1.95e-297	817	KOG1471@1|root,KOG1471@2759|Eukaryota,37PBT@33090|Viridiplantae,3G7A6@35493|Streptophyta	35493|Streptophyta	I	SEC14 cytosolic factor family protein phosphoglyceride transfer family protein	-	-	-	-	-	-	-	-	-	-	-	-	CRAL_TRIO
file_1_file_1_jg13908.t1	71139.XP_010024225.1	7.89e-42	140	KOG4168@1|root,KOG4168@2759|Eukaryota,37V7A@33090|Viridiplantae,3GJEN@35493|Streptophyta	35493|Streptophyta	K	DNA-directed RNA polymerase III subunit	-	GO:0000428,GO:0003674,GO:0003824,GO:0003899,GO:0005575,GO:0005622,GO:0005623,GO:0005634,GO:0005654,GO:0005666,GO:0005737,GO:0005886,GO:0006139,GO:0006351,GO:0006352,GO:0006383,GO:0006384,GO:0006725,GO:0006807,GO:0007568,GO:0008150,GO:0008152,GO:0009058,GO:0009059,GO:0009360,GO:0009987,GO:0010467,GO:0016020,GO:0016070,GO:0016740,GO:0016772,GO:0016779,GO:0018130,GO:0019438,GO:0030424,GO:0030425,GO:…	-	-	-	-	-	-	-	-	-	-	RNA_pol_Rpb4
file_1_file_1_jg13909.t1	71139.XP_010043570.1	9.37e-59	184	2CGCN@1|root,2RZNE@2759|Eukaryota,37UIX@33090|Viridiplantae,3GIVT@35493|Streptophyta	35493|Streptophyta	S	Dessication-induced 1VOC superfamily protein	-	-	-	-	-	-	-	-	-	-	-	-	Glyoxalase,Glyoxalase_2
file_1_file_1_jg13911.t1	71139.XP_010043569.1	3.23e-263	729	COG0706@1|root,KOG1239@2759|Eukaryota,37IIV@33090|Viridiplantae,3GB9B@35493|Streptophyta	35493|Streptophyta	OU	Inner membrane protein PPF-1	-	-	-	ko:K03217	ko02024,ko03060,ko03070,map02024,map03060,map03070	M00335	-	-	ko00000,ko00001,ko00002,ko02044,ko03029	2.A.9	-	-	60KD_IMP
file_1_file_1_jg13912.t1	981085.XP_010106453.1	2.89e-259	751	KOG0167@1|root,KOG0167@2759|Eukaryota,37I20@33090|Viridiplantae,3GAWQ@35493|Streptophyta,4JMUZ@91835|fabids	35493|Streptophyta	L	RING-type E3 ubiquitin transferase	-	GO:0002682,GO:0002683,GO:0003674,GO:0003676,GO:0003723,GO:0003735,GO:0003824,GO:0004842,GO:0005102,GO:0005198,GO:0005488,GO:0005515,GO:0005575,GO:0005622,GO:0005623,GO:0005634,GO:0005737,GO:0005829,GO:0005840,GO:0006464,GO:0006807,GO:0006950,GO:0006952,GO:0008150,GO:0008152,GO:0009605,GO:0009607,GO:0009617,GO:0009987,GO:0010941,GO:0015934,GO:0016567,GO:0016740,GO:0019538,GO:0019787,GO:0019843,GO:…	2.7.11.1	ko:K04733,ko:K08332	ko04010,ko04064,ko04620,ko04621,ko04624,ko04722,ko05133,ko05140,ko05142,ko05145,ko05152,ko05162,ko05164,map04010,map04064,map04620,map04621,map04624,map04722,map05133,map05140,map05142,map05145,map05152,map05162,map05164	M00686	-	-	ko00000,ko00001,ko00002,ko01000,ko01001,ko03029,ko04131	-	-	-	Arm,U-box
file_1_file_1_jg13914.t1	71139.XP_010064011.1	1.1e-08	60.8	COG0452@1|root,KOG2728@2759|Eukaryota,37RAD@33090|Viridiplantae,3G8MS@35493|Streptophyta	35493|Streptophyta	H	Phosphopantothenate-cysteine ligase	-	GO:0003674,GO:0003824,GO:0004632,GO:0006139,GO:0006163,GO:0006164,GO:0006725,GO:0006732,GO:0006753,GO:0006793,GO:0006796,GO:0006807,GO:0008150,GO:0008152,GO:0009058,GO:0009108,GO:0009117,GO:0009150,GO:0009152,GO:0009165,GO:0009259,GO:0009260,GO:0009987,GO:0015936,GO:0015937,GO:0016874,GO:0016879,GO:0016881,GO:0018130,GO:0019438,GO:0019637,GO:0019693,GO:0033865,GO:0033866,GO:0033875,GO:0034030,GO:…	6.3.2.51	ko:K01922	ko00770,ko01100,map00770,map01100	M00120	R04230	RC00064,RC00090	ko00000,ko00001,ko00002,ko01000	-	-	-	DFP
file_1_file_1_jg13915.t1	71139.XP_010024225.1	2.32e-69	211	KOG4168@1|root,KOG4168@2759|Eukaryota,37V7A@33090|Viridiplantae,3GJEN@35493|Streptophyta	35493|Streptophyta	K	DNA-directed RNA polymerase III subunit	-	GO:0000428,GO:0003674,GO:0003824,GO:0003899,GO:0005575,GO:0005622,GO:0005623,GO:0005634,GO:0005654,GO:0005666,GO:0005737,GO:0005886,GO:0006139,GO:0006351,GO:0006352,GO:0006383,GO:0006384,GO:0006725,GO:0006807,GO:0007568,GO:0008150,GO:0008152,GO:0009058,GO:0009059,GO:0009360,GO:0009987,GO:0010467,GO:0016020,GO:0016070,GO:0016740,GO:0016772,GO:0016779,GO:0018130,GO:0019438,GO:0030424,GO:0030425,GO:…	-	-	-	-	-	-	-	-	-	-	RNA_pol_Rpb4
file_1_file_1_jg13917.t1	71139.XP_010043564.1	4.18e-193	539	COG5273@1|root,KOG0509@2759|Eukaryota,37Q7Y@33090|Viridiplantae,3GD6E@35493|Streptophyta	35493|Streptophyta	S	Belongs to the DHHC palmitoyltransferase family	-	GO:0003674,GO:0003824,GO:0005575,GO:0005622,GO:0005623,GO:0005737,GO:0005783,GO:0006464,GO:0006497,GO:0006807,GO:0008150,GO:0008152,GO:0009058,GO:0009059,GO:0009987,GO:0012505,GO:0016409,GO:0016740,GO:0016746,GO:0016747,GO:0018345,GO:0019538,GO:0034645,GO:0036211,GO:0042157,GO:0042158,GO:0043170,GO:0043226,GO:0043227,GO:0043229,GO:0043231,GO:0043412,GO:0043543,GO:0044237,GO:0044238,GO:0044249,GO:…	2.3.1.225	ko:K20032	-	-	-	-	ko00000,ko01000,ko04131	9.B.37.1,9.B.37.3	-	-	DHHC
file_1_file_1_jg13918.t1	71139.XP_010043565.1	9.58e-34	120	COG0071@1|root,KOG0710@2759|Eukaryota,37TQV@33090|Viridiplantae,3GBV3@35493|Streptophyta	35493|Streptophyta	O	Belongs to the small heat shock protein (HSP20) family	-	GO:0000302,GO:0006950,GO:0006979,GO:0008150,GO:0009266,GO:0009408,GO:0009628,GO:0009636,GO:0010033,GO:0010035,GO:0010038,GO:0042221,GO:0042493,GO:0042542,GO:0045471,GO:0046677,GO:0046685,GO:0046686,GO:0046688,GO:0050896,GO:0097305,GO:1901700	-	ko:K13993	ko04141,map04141	-	-	-	ko00000,ko00001,ko03110	-	-	-	HSP20
file_1_file_1_jg13919.t1	71139.XP_010043607.1	4.67e-263	741	28PAB@1|root,2QVXJ@2759|Eukaryota,37QS9@33090|Viridiplantae,3GEVM@35493|Streptophyta	35493|Streptophyta	S	LRR receptor-like serine threonine-protein kinase	-	-	-	-	-	-	-	-	-	-	-	-	LRR_4,LRR_8,Malectin_like
file_1_file_1_jg13920.t1	71139.XP_010043565.1	1.49e-102	297	COG0071@1|root,KOG0710@2759|Eukaryota,37TQV@33090|Viridiplantae,3GBV3@35493|Streptophyta	35493|Streptophyta	O	Belongs to the small heat shock protein (HSP20) family	-	GO:0000302,GO:0006950,GO:0006979,GO:0008150,GO:0009266,GO:0009408,GO:0009628,GO:0009636,GO:0010033,GO:0010035,GO:0010038,GO:0042221,GO:0042493,GO:0042542,GO:0045471,GO:0046677,GO:0046685,GO:0046686,GO:0046688,GO:0050896,GO:0097305,GO:1901700	-	ko:K13993	ko04141,map04141	-	-	-	ko00000,ko00001,ko03110	-	-	-	HSP20
file_1_file_1_jg13921.t1	71139.XP_010043563.1	6.04e-291	798	COG0666@1|root,KOG4177@2759|Eukaryota,37S48@33090|Viridiplantae,3GERG@35493|Streptophyta	35493|Streptophyta	O	E3 ubiquitin-protein ligase	-	GO:0003674,GO:0003824,GO:0004842,GO:0006464,GO:0006807,GO:0006950,GO:0006952,GO:0008150,GO:0008152,GO:0009605,GO:0009607,GO:0009617,GO:0009987,GO:0016567,GO:0016740,GO:0019538,GO:0019787,GO:0032446,GO:0036211,GO:0042742,GO:0043170,GO:0043207,GO:0043412,GO:0044237,GO:0044238,GO:0044260,GO:0044267,GO:0050896,GO:0051704,GO:0051707,GO:0051865,GO:0070647,GO:0071704,GO:0098542,GO:0140096,GO:1901564	2.3.2.27	ko:K19044	-	-	-	-	ko00000,ko01000,ko04121	-	-	-	Ank,Ank_2,Ank_3,Ank_4,Ank_5
file_1_file_1_jg13922.t1	3694.POPTR_0009s03550.1	1.44e-14	76.6	2DFRF@1|root,2S5SV@2759|Eukaryota,37WJZ@33090|Viridiplantae,3GKBH@35493|Streptophyta,4JR1S@91835|fabids	35493|Streptophyta	-	-	-	-	-	-	-	-	-	-	-	-	-	-	-
file_1_file_1_jg13923.t1	71139.XP_010043562.1	0	1269	COG0515@1|root,2QVJF@2759|Eukaryota,37JRJ@33090|Viridiplantae,3GFM7@35493|Streptophyta	35493|Streptophyta	T	U-box domain-containing protein	-	-	-	-	-	-	-	-	-	-	-	-	Pkinase,Pkinase_Tyr,U-box,Usp
file_1_file_2_19481_t	71139.XP_010043561.1	4.56e-196	548	KOG2056@1|root,KOG2056@2759|Eukaryota,37RB8@33090|Viridiplantae,3G96M@35493|Streptophyta	35493|Streptophyta	F	ENTH domain	-	-	-	ko:K12471	ko04144,map04144	-	-	-	ko00000,ko00001,ko04131	-	-	-	ENTH
file_1_file_1_jg13924.t1	71139.XP_010043561.1	4.49e-201	561	KOG2056@1|root,KOG2056@2759|Eukaryota,37RB8@33090|Viridiplantae,3G96M@35493|Streptophyta	35493|Streptophyta	F	ENTH domain	-	-	-	ko:K12471	ko04144,map04144	-	-	-	ko00000,ko00001,ko04131	-	-	-	ENTH
file_1_file_1_jg13925.t1	71139.XP_010043560.1	0	1142	COG0631@1|root,KOG0700@2759|Eukaryota,37I37@33090|Viridiplantae,3G8CR@35493|Streptophyta	35493|Streptophyta	T	phosphatase 2C	-	GO:0005575,GO:0005623,GO:0005886,GO:0007275,GO:0008150,GO:0016020,GO:0032501,GO:0032502,GO:0044464,GO:0048366,GO:0048367,GO:0048731,GO:0048827,GO:0048856,GO:0071944,GO:0099402	-	-	-	-	-	-	-	-	-	-	PP2C
file_1_file_1_jg13926.t1	71139.XP_010043558.1	3.49e-249	694	28NS7@1|root,2QVC9@2759|Eukaryota,37NTQ@33090|Viridiplantae,3GD6U@35493|Streptophyta	35493|Streptophyta	S	fasciclin-like arabinogalactan protein	-	GO:0000003,GO:0001871,GO:0003006,GO:0003674,GO:0005488,GO:0005575,GO:0005623,GO:0005886,GO:0006950,GO:0006970,GO:0007155,GO:0007275,GO:0008150,GO:0008152,GO:0009058,GO:0009628,GO:0009651,GO:0009791,GO:0009825,GO:0009897,GO:0009986,GO:0009987,GO:0010154,GO:0010191,GO:0010192,GO:0010214,GO:0016020,GO:0016049,GO:0022414,GO:0022610,GO:0030246,GO:0030247,GO:0031224,GO:0031225,GO:0031226,GO:0032501,GO:…	-	-	-	-	-	-	-	-	-	-	Fasciclin
file_1_file_1_jg13927.t1	71139.XP_010043557.1	4.61e-294	812	COG0536@1|root,KOG1489@2759|Eukaryota,37N5G@33090|Viridiplantae,3G859@35493|Streptophyta	35493|Streptophyta	S	GTP-binding protein OBGM, mitochondrial	-	-	-	ko:K03979	-	-	-	-	ko00000,ko01000,ko03009	-	-	-	GTP1_OBG,MMR_HSR1
file_1_file_1_jg13928.t1	71139.XP_010043556.1	1.23e-29	107	KOG4738@1|root,KOG4738@2759|Eukaryota,37X5N@33090|Viridiplantae,3GKZN@35493|Streptophyta	35493|Streptophyta	S	Metallothionein-like protein	-	-	-	-	-	-	-	-	-	-	-	-	Metallothio_2
file_1_file_1_jg13929.t1	71139.XP_010043555.1	1.15e-297	827	28KU5@1|root,2QTAD@2759|Eukaryota,37KZH@33090|Viridiplantae,3G8F9@35493|Streptophyta	35493|Streptophyta	G	Belongs to the glycosyl hydrolase 17 family	-	-	-	-	-	-	-	-	-	-	-	-	Glyco_hydro_17,X8
file_1_file_1_jg13930.t1	71139.XP_010043547.1	3.03e-262	722	COG0515@1|root,KOG1187@2759|Eukaryota,37J3B@33090|Viridiplantae,3GDZ7@35493|Streptophyta	35493|Streptophyta	T	Belongs to the protein kinase superfamily	-	GO:0003674,GO:0003824,GO:0004672,GO:0004674,GO:0004675,GO:0004888,GO:0006464,GO:0006468,GO:0006793,GO:0006796,GO:0006807,GO:0007154,GO:0007165,GO:0007166,GO:0007167,GO:0007178,GO:0008150,GO:0008152,GO:0009987,GO:0010119,GO:0016301,GO:0016310,GO:0016740,GO:0016772,GO:0016773,GO:0019199,GO:0019538,GO:0023052,GO:0036211,GO:0038023,GO:0043170,GO:0043412,GO:0044237,GO:0044238,GO:0044260,GO:0044267,GO:…	-	-	-	-	-	-	-	-	-	-	Pkinase,Pkinase_Tyr
file_1_file_1_jg13931.t1	71139.XP_010043546.1	6.74e-291	798	COG0515@1|root,KOG1187@2759|Eukaryota,37M3T@33090|Viridiplantae,3GA1J@35493|Streptophyta	35493|Streptophyta	T	receptor-like protein kinase	-	-	2.7.11.1	ko:K04733	ko04010,ko04064,ko04620,ko04621,ko04624,ko04722,ko05133,ko05140,ko05142,ko05145,ko05152,ko05162,ko05164,map04010,map04064,map04620,map04621,map04624,map04722,map05133,map05140,map05142,map05145,map05152,map05162,map05164	M00686	-	-	ko00000,ko00001,ko00002,ko01000,ko01001	-	-	-	Pkinase,Pkinase_Tyr
file_1_file_1_jg13933.t1	71139.XP_010046401.1	3.38e-87	256	2BDFH@1|root,2S0DG@2759|Eukaryota,37UX9@33090|Viridiplantae,3GIV5@35493|Streptophyta	35493|Streptophyta	S	Flowering-promoting factor 1-like	-	-	-	-	-	-	-	-	-	-	-	-	-
file_1_file_1_jg13934.t1	71139.XP_010043544.1	6.17e-300	841	28PYQ@1|root,2QWMB@2759|Eukaryota,37RBG@33090|Viridiplantae,3GGSV@35493|Streptophyta	35493|Streptophyta	S	XH XS domain-containing protein	-	GO:0005575,GO:0005622,GO:0005623,GO:0005634,GO:0005655,GO:0005730,GO:0006139,GO:0006259,GO:0006304,GO:0006305,GO:0006306,GO:0006725,GO:0006807,GO:0008150,GO:0008152,GO:0009892,GO:0009987,GO:0010468,GO:0010605,GO:0010629,GO:0016070,GO:0016458,GO:0019222,GO:0030677,GO:0030681,GO:0031047,GO:0031974,GO:0031981,GO:0032259,GO:0032991,GO:0034641,GO:0043170,GO:0043226,GO:0043227,GO:0043228,GO:0043229,GO:…	-	-	-	-	-	-	-	-	-	-	XH,XS,zf-XS
file_1_file_2_19490_t	71139.XP_010043544.1	0	893	28PYQ@1|root,2QWMB@2759|Eukaryota,37RBG@33090|Viridiplantae,3GGSV@35493|Streptophyta	35493|Streptophyta	S	XH XS domain-containing protein	-	GO:0005575,GO:0005622,GO:0005623,GO:0005634,GO:0005655,GO:0005730,GO:0006139,GO:0006259,GO:0006304,GO:0006305,GO:0006306,GO:0006725,GO:0006807,GO:0008150,GO:0008152,GO:0009892,GO:0009987,GO:0010468,GO:0010605,GO:0010629,GO:0016070,GO:0016458,GO:0019222,GO:0030677,GO:0030681,GO:0031047,GO:0031974,GO:0031981,GO:0032259,GO:0032991,GO:0034641,GO:0043170,GO:0043226,GO:0043227,GO:0043228,GO:0043229,GO:…	-	-	-	-	-	-	-	-	-	-	XH,XS,zf-XS
file_1_file_1_jg13935.t1	71139.XP_010043542.1	2.22e-131	378	28JEF@1|root,2QR06@2759|Eukaryota,37JKQ@33090|Viridiplantae,3GATN@35493|Streptophyta	35493|Streptophyta	S	atexp4,atexpa4,athexp alpha 1.6,expa4	-	-	-	-	-	-	-	-	-	-	-	-	DPBB_1,Pollen_allerg_1
file_1_file_1_jg13936.t1	71139.XP_010046399.1	8.8e-254	711	KOG1021@1|root,KOG1021@2759|Eukaryota,37IWB@33090|Viridiplantae,3GGYD@35493|Streptophyta	35493|Streptophyta	GMW	xyloglucan galactosyltransferase	-	-	-	ko:K20888	-	-	-	-	ko00000,ko01000,ko01003	-	GT47	-	Exostosin
file_1_file_1_jg13937.t1	71139.XP_010046398.1	2.8e-165	468	2CMT8@1|root,2QRUP@2759|Eukaryota,37P9B@33090|Viridiplantae,3GDXZ@35493|Streptophyta	35493|Streptophyta	S	PGR5-like protein	-	-	-	-	-	-	-	-	-	-	-	-	-
file_1_file_2_19498_t	225117.XP_009375896.1	5.55e-304	832	KOG1737@1|root,KOG1737@2759|Eukaryota,37K23@33090|Viridiplantae,3GFHQ@35493|Streptophyta,4JIS4@91835|fabids	35493|Streptophyta	I	Belongs to the OSBP family	-	GO:0005575,GO:0005622,GO:0005623,GO:0005737,GO:0005829,GO:0044424,GO:0044444,GO:0044464	1.8.5.7	ko:K07393,ko:K20174,ko:K20463	-	-	-	-	ko00000,ko01000,ko04131	-	-	-	Oxysterol_BP
file_1_file_1_jg13939.t1	225117.XP_009375896.1	4.67e-278	765	KOG1737@1|root,KOG1737@2759|Eukaryota,37K23@33090|Viridiplantae,3GFHQ@35493|Streptophyta,4JIS4@91835|fabids	35493|Streptophyta	I	Belongs to the OSBP family	-	GO:0005575,GO:0005622,GO:0005623,GO:0005737,GO:0005829,GO:0044424,GO:0044444,GO:0044464	1.8.5.7	ko:K07393,ko:K20174,ko:K20463	-	-	-	-	ko00000,ko01000,ko04131	-	-	-	Oxysterol_BP
file_1_file_1_jg13940.t1	71139.XP_010043540.1	0	1083	2CMAF@1|root,2QPSZ@2759|Eukaryota,37MPA@33090|Viridiplantae,3G74I@35493|Streptophyta	35493|Streptophyta	K	Telomere repeat-binding protein	-	GO:0000160,GO:0000228,GO:0000723,GO:0000781,GO:0000782,GO:0000783,GO:0000784,GO:0001101,GO:0003674,GO:0003676,GO:0003677,GO:0003690,GO:0003691,GO:0005488,GO:0005575,GO:0005622,GO:0005623,GO:0005634,GO:0005635,GO:0005694,GO:0005737,GO:0005886,GO:0006139,GO:0006259,GO:0006725,GO:0006807,GO:0006950,GO:0006970,GO:0006996,GO:0007154,GO:0007165,GO:0008150,GO:0008152,GO:0008301,GO:0009628,GO:0009651,GO:…	-	-	-	-	-	-	-	-	-	-	-
file_1_file_1_jg13941.t1	71139.XP_010046395.1	4.55e-47	174	28K9J@1|root,2QSQ6@2759|Eukaryota,37J2K@33090|Viridiplantae,3G71V@35493|Streptophyta	35493|Streptophyta	K	Belongs to the GRAS family	-	-	-	-	-	-	-	-	-	-	-	-	GRAS
file_1_file_1_jg13948.t2	71139.XP_010043517.1	7.22e-157	463	28NDV@1|root,2QUZA@2759|Eukaryota,37IFH@33090|Viridiplantae,3GEAM@35493|Streptophyta	35493|Streptophyta	K	Belongs to the GRAS family	-	GO:0003674,GO:0003676,GO:0003677,GO:0003700,GO:0005488,GO:0005575,GO:0005622,GO:0005623,GO:0005634,GO:0006355,GO:0008150,GO:0009889,GO:0010033,GO:0010200,GO:0010243,GO:0010468,GO:0010556,GO:0019219,GO:0019222,GO:0031323,GO:0031326,GO:0042221,GO:0042493,GO:0043226,GO:0043227,GO:0043229,GO:0043231,GO:0043565,GO:0044424,GO:0044464,GO:0050789,GO:0050794,GO:0050896,GO:0051171,GO:0051252,GO:0060255,GO:…	-	-	-	-	-	-	-	-	-	-	GRAS
file_1_file_1_jg13948.t1	71139.XP_010043517.1	1.56e-156	463	28NDV@1|root,2QUZA@2759|Eukaryota,37IFH@33090|Viridiplantae,3GEAM@35493|Streptophyta	35493|Streptophyta	K	Belongs to the GRAS family	-	GO:0003674,GO:0003676,GO:0003677,GO:0003700,GO:0005488,GO:0005575,GO:0005622,GO:0005623,GO:0005634,GO:0006355,GO:0008150,GO:0009889,GO:0010033,GO:0010200,GO:0010243,GO:0010468,GO:0010556,GO:0019219,GO:0019222,GO:0031323,GO:0031326,GO:0042221,GO:0042493,GO:0043226,GO:0043227,GO:0043229,GO:0043231,GO:0043565,GO:0044424,GO:0044464,GO:0050789,GO:0050794,GO:0050896,GO:0051171,GO:0051252,GO:0060255,GO:…	-	-	-	-	-	-	-	-	-	-	GRAS
file_1_file_1_jg13947.t1	71139.XP_010043516.1	4.37e-100	293	2APG8@1|root,2RZGQ@2759|Eukaryota,37V29@33090|Viridiplantae,3GIYJ@35493|Streptophyta	35493|Streptophyta	-	-	-	-	-	ko:K12593	ko03018,map03018	-	-	-	ko00000,ko00001,ko03019	-	-	-	MPP6
file_1_file_1_jg13947.t2	71139.XP_010043516.1	1.69e-57	182	2APG8@1|root,2RZGQ@2759|Eukaryota,37V29@33090|Viridiplantae,3GIYJ@35493|Streptophyta	35493|Streptophyta	-	-	-	-	-	ko:K12593	ko03018,map03018	-	-	-	ko00000,ko00001,ko03019	-	-	-	MPP6
file_1_file_1_jg13949.t1	71139.XP_010043509.1	0	1456	COG0465@1|root,KOG0731@2759|Eukaryota,37IFQ@33090|Viridiplantae,3GE5T@35493|Streptophyta	35493|Streptophyta	O	ATP-dependent zinc metalloprotease FTSH	-	-	-	ko:K08956	-	-	-	-	ko00000,ko01000,ko01002,ko03110	-	-	-	AAA,FtsH_ext,Peptidase_M41
file_1_file_1_jg13950.t1	71139.XP_010043508.1	3.54e-215	600	COG2020@1|root,KOG2628@2759|Eukaryota,37RPT@33090|Viridiplantae,3GFY5@35493|Streptophyta	35493|Streptophyta	O	Phospholipid methyltransferase	-	-	-	-	-	-	-	-	-	-	-	-	PEMT
file_1_file_1_jg13951.t1	71139.XP_010043506.1	4.08e-306	841	COG2124@1|root,KOG0157@2759|Eukaryota,37P67@33090|Viridiplantae,3G9AX@35493|Streptophyta	35493|Streptophyta	Q	Belongs to the cytochrome P450 family	CYP707A2	GO:0000003,GO:0003006,GO:0003674,GO:0003824,GO:0004497,GO:0006066,GO:0006082,GO:0006629,GO:0006694,GO:0006714,GO:0006720,GO:0006721,GO:0007275,GO:0008150,GO:0008152,GO:0008202,GO:0008610,GO:0009058,GO:0009314,GO:0009416,GO:0009628,GO:0009639,GO:0009687,GO:0009791,GO:0009987,GO:0010114,GO:0010154,GO:0010162,GO:0010268,GO:0010295,GO:0010431,GO:0010817,GO:0016125,GO:0016128,GO:0016129,GO:0016131,GO:…	1.14.13.93	ko:K09843	ko00906,map00906	-	R07202	RC00257	ko00000,ko00001,ko00199,ko01000	-	-	-	p450
file_1_file_1_jg13953.t1	29730.Gorai.009G097700.1	1.31e-09	56.6	2BY5Y@1|root,2SF6U@2759|Eukaryota,37XVU@33090|Viridiplantae,3GM6A@35493|Streptophyta	35493|Streptophyta	-	-	-	-	-	-	-	-	-	-	-	-	-	-	-
file_1_file_1_jg13954.t1	71139.XP_010043505.1	1.26e-24	97.4	2CCKP@1|root,2S3XH@2759|Eukaryota,37WTF@33090|Viridiplantae,3GKKH@35493|Streptophyta	35493|Streptophyta	S	DVL family	-	-	-	-	-	-	-	-	-	-	-	-	DVL
file_1_file_1_jg13955.t1	57918.XP_004295998.1	2.97e-140	405	COG2132@1|root,KOG1263@2759|Eukaryota,37KZ3@33090|Viridiplantae,3GAGG@35493|Streptophyta,4JDGX@91835|fabids	35493|Streptophyta	Q	Lignin degradation and detoxification of lignin-derived products	-	GO:0003674,GO:0003824,GO:0006725,GO:0008150,GO:0008152,GO:0009058,GO:0009698,GO:0009699,GO:0009808,GO:0009809,GO:0009987,GO:0016491,GO:0016722,GO:0019438,GO:0019748,GO:0044237,GO:0044249,GO:0044550,GO:0055114,GO:0071704,GO:1901360,GO:1901362,GO:1901576	1.10.3.2	ko:K05909	-	-	-	-	ko00000,ko01000	-	-	-	Cu-oxidase,Cu-oxidase_2,Cu-oxidase_3
file_1_file_1_jg13956.t1	71139.XP_010043503.1	3.55e-194	543	KOG1558@1|root,KOG1558@2759|Eukaryota,37HN2@33090|Viridiplantae,3GA3Q@35493|Streptophyta	35493|Streptophyta	P	zinc transporter	-	GO:0000041,GO:0003674,GO:0005215,GO:0005385,GO:0005575,GO:0005623,GO:0005886,GO:0006810,GO:0006811,GO:0006812,GO:0006829,GO:0008150,GO:0008324,GO:0015075,GO:0015318,GO:0016020,GO:0022857,GO:0022890,GO:0030001,GO:0034220,GO:0044464,GO:0046873,GO:0046915,GO:0051179,GO:0051234,GO:0055085,GO:0070838,GO:0071577,GO:0071944,GO:0072509,GO:0072511,GO:0098655,GO:0098660,GO:0098662	-	ko:K14709	-	-	-	-	ko00000,ko02000	2.A.5.1,2.A.5.3,2.A.5.6	-	-	Zip
file_1_file_1_jg13957.t1	71139.XP_010043502.1	0	1512	COG5099@1|root,KOG1488@2759|Eukaryota,37HNU@33090|Viridiplantae,3GAB4@35493|Streptophyta	35493|Streptophyta	J	pumilio homolog	-	GO:0003674,GO:0003676,GO:0003723,GO:0003729,GO:0003730,GO:0005488,GO:0005575,GO:0005622,GO:0005623,GO:0005737,GO:0005829,GO:0044424,GO:0044444,GO:0044464,GO:0097159,GO:1901363	-	ko:K17943	-	-	-	-	ko00000	-	-	-	NABP,PUF
file_1_file_1_jg13958.t1	71139.XP_010043501.1	7.69e-139	404	2C4RN@1|root,2RIEW@2759|Eukaryota,37NY2@33090|Viridiplantae,3GDFA@35493|Streptophyta	35493|Streptophyta	K	transcription factor	PCL1	GO:0000156,GO:0000160,GO:0003674,GO:0003700,GO:0005575,GO:0005622,GO:0005623,GO:0005634,GO:0006355,GO:0007154,GO:0007165,GO:0007275,GO:0007568,GO:0007623,GO:0008150,GO:0009653,GO:0009719,GO:0009723,GO:0009725,GO:0009735,GO:0009736,GO:0009755,GO:0009873,GO:0009888,GO:0009889,GO:0009909,GO:0009987,GO:0010015,GO:0010033,GO:0010073,GO:0010075,GO:0010082,GO:0010119,GO:0010150,GO:0010468,GO:0010556,GO:…	-	-	-	-	-	-	-	-	-	-	Myb_DNA-binding
file_1_file_1_jg13959.t1	71139.XP_010043500.1	0	1422	COG4775@1|root,2QTZ3@2759|Eukaryota,37RQT@33090|Viridiplantae,3GCBJ@35493|Streptophyta	35493|Streptophyta	M	Protein TOC75-3, chloroplastic	TOC75-III	GO:0005575,GO:0005622,GO:0005623,GO:0005737,GO:0005773,GO:0005774,GO:0006605,GO:0006810,GO:0006886,GO:0006996,GO:0007275,GO:0008104,GO:0008150,GO:0009507,GO:0009526,GO:0009527,GO:0009536,GO:0009653,GO:0009657,GO:0009658,GO:0009662,GO:0009707,GO:0009719,GO:0009725,GO:0009735,GO:0009790,GO:0009941,GO:0009987,GO:0010006,GO:0010033,GO:0015031,GO:0015833,GO:0016020,GO:0016021,GO:0016043,GO:0017038,GO:…	-	-	-	-	-	-	-	-	-	-	Bac_surface_Ag
file_1_file_1_jg13960.t1	71139.XP_010046390.1	1.13e-126	377	29XAP@1|root,2RXRD@2759|Eukaryota,37UB9@33090|Viridiplantae,3GEGQ@35493|Streptophyta	35493|Streptophyta	-	-	-	-	-	-	-	-	-	-	-	-	-	-	-
file_1_file_1_jg13961.t1	71139.XP_010043499.1	4.39e-304	830	COG1222@1|root,KOG0651@2759|Eukaryota,37NE7@33090|Viridiplantae,3G824@35493|Streptophyta	35493|Streptophyta	O	Ribulose bisphosphate carboxylase oxygenase activase	-	-	-	-	-	-	-	-	-	-	-	-	AAA
file_1_file_1_jg13962.t1	71139.XP_010043498.1	0	967	KOG0254@1|root,KOG0254@2759|Eukaryota,37K9D@33090|Viridiplantae,3G7KK@35493|Streptophyta	35493|Streptophyta	U	Belongs to the major facilitator superfamily. Sugar transporter (TC 2.A.1.1) family	-	GO:0003674,GO:0005215,GO:0005351,GO:0005355,GO:0005402,GO:0005575,GO:0005622,GO:0005623,GO:0005737,GO:0006810,GO:0006811,GO:0006812,GO:0008150,GO:0008324,GO:0008643,GO:0008645,GO:0009507,GO:0009526,GO:0009536,GO:0009941,GO:0015075,GO:0015077,GO:0015078,GO:0015144,GO:0015145,GO:0015149,GO:0015291,GO:0015293,GO:0015294,GO:0015295,GO:0015318,GO:0015672,GO:0015749,GO:0022804,GO:0022857,GO:0022890,GO:…	-	-	-	-	-	-	-	-	-	-	Sugar_tr
file_1_file_1_jg13963.t1	42345.XP_008801649.1	1.64e-06	50.8	2E0FY@1|root,2S7WG@2759|Eukaryota,37X07@33090|Viridiplantae,3GM8Z@35493|Streptophyta,3M0XA@4447|Liliopsida	35493|Streptophyta	-	-	-	-	-	-	-	-	-	-	-	-	-	-	-
file_1_file_2_19525_t	71139.XP_010043494.1	8.84e-114	351	KOG2146@1|root,KOG2146@2759|Eukaryota,37PRG@33090|Viridiplantae,3GEWM@35493|Streptophyta	35493|Streptophyta	A	Serine arginine repetitive matrix protein	-	-	-	ko:K13171	ko03013,ko03015,map03013,map03015	M00430	-	-	ko00000,ko00001,ko00002,ko03019,ko03041	-	-	-	PWI
file_1_file_1_jg13964.t1	71139.XP_010043494.1	1.89e-259	752	KOG2146@1|root,KOG2146@2759|Eukaryota,37PRG@33090|Viridiplantae,3GEWM@35493|Streptophyta	35493|Streptophyta	A	Serine arginine repetitive matrix protein	-	-	-	ko:K13171	ko03013,ko03015,map03013,map03015	M00430	-	-	ko00000,ko00001,ko00002,ko03019,ko03041	-	-	-	PWI
file_1_file_2_19527_t	71139.XP_010043494.1	1.71e-139	427	KOG2146@1|root,KOG2146@2759|Eukaryota,37PRG@33090|Viridiplantae,3GEWM@35493|Streptophyta	35493|Streptophyta	A	Serine arginine repetitive matrix protein	-	-	-	ko:K13171	ko03013,ko03015,map03013,map03015	M00430	-	-	ko00000,ko00001,ko00002,ko03019,ko03041	-	-	-	PWI
file_1_file_1_jg13965.t1	71139.XP_010043493.1	3.07e-284	788	COG0702@1|root,KOG1203@2759|Eukaryota,37IJN@33090|Viridiplantae,3GBDY@35493|Streptophyta	35493|Streptophyta	G	Protein TIC 62, chloroplastic	-	GO:0000229,GO:0005575,GO:0005622,GO:0005623,GO:0005694,GO:0005737,GO:0007623,GO:0008150,GO:0009295,GO:0009507,GO:0009508,GO:0009526,GO:0009532,GO:0009534,GO:0009535,GO:0009536,GO:0009570,GO:0009579,GO:0009941,GO:0016020,GO:0031967,GO:0031975,GO:0031976,GO:0031984,GO:0034357,GO:0042644,GO:0042646,GO:0042651,GO:0043226,GO:0043227,GO:0043228,GO:0043229,GO:0043231,GO:0043232,GO:0044422,GO:0044424,GO:…	-	-	-	-	-	-	-	-	-	-	NAD_binding_10
file_1_file_1_jg13966.t1	71139.XP_010046388.1	2.34e-77	237	28MY2@1|root,2S768@2759|Eukaryota,37WP3@33090|Viridiplantae,3GKG5@35493|Streptophyta	35493|Streptophyta	S	Transcriptional regulator	-	-	-	-	-	-	-	-	-	-	-	-	-
file_1_file_1_jg13967.t1	71139.XP_010043492.1	1.76e-183	516	COG1028@1|root,KOG0725@2759|Eukaryota,37IWV@33090|Viridiplantae,3GG3E@35493|Streptophyta	35493|Streptophyta	Q	Tropinone reductase homolog	-	-	1.1.1.206	ko:K08081	ko00960,ko01100,ko01110,map00960,map01100,map01110	-	R02832	RC00144	ko00000,ko00001,ko01000	-	-	-	adh_short,adh_short_C2
file_1_file_2_19532_t	71139.XP_010043491.1	1.21e-198	564	28KCW@1|root,2QSTT@2759|Eukaryota,37Q9F@33090|Viridiplantae,3GBDK@35493|Streptophyta	35493|Streptophyta	-	-	-	-	-	-	-	-	-	-	-	-	-	-	-
file_1_file_1_jg13969.t1	71139.XP_010043491.1	2.47e-216	610	28KCW@1|root,2QSTT@2759|Eukaryota,37Q9F@33090|Viridiplantae,3GBDK@35493|Streptophyta	35493|Streptophyta	-	-	-	-	-	-	-	-	-	-	-	-	-	-	-
file_1_file_1_jg13970.t1	71139.XP_010043490.1	5.97e-218	602	COG0639@1|root,KOG0374@2759|Eukaryota,37IYN@33090|Viridiplantae,3G8UW@35493|Streptophyta	33090|Viridiplantae	T	serine threonine-protein phosphatase	-	GO:0000164,GO:0003674,GO:0003824,GO:0004721,GO:0004722,GO:0005575,GO:0005622,GO:0005623,GO:0005737,GO:0006464,GO:0006470,GO:0006793,GO:0006796,GO:0006807,GO:0008150,GO:0008152,GO:0008287,GO:0009987,GO:0016311,GO:0016787,GO:0016788,GO:0016791,GO:0019538,GO:0032991,GO:0036211,GO:0042578,GO:0043170,GO:0043412,GO:0044237,GO:0044238,GO:0044260,GO:0044267,GO:0044424,GO:0044444,GO:0044464,GO:0071704,GO:…	3.1.3.16	ko:K06269	ko03015,ko04022,ko04024,ko04113,ko04114,ko04218,ko04261,ko04270,ko04390,ko04510,ko04611,ko04720,ko04728,ko04750,ko04810,ko04910,ko04921,ko04931,ko05031,ko05034,ko05168,ko05205,map03015,map04022,map04024,map04113,map04114,map04218,map04261,map04270,map04390,map04510,map04611,map04720,map04728,map04750,map04810,map04910,map04921,map04931,map05031,map05034,map05168,map05205	-	-	-	ko00000,ko00001,ko01000,ko01009,ko03019,ko03021,ko03041	-	-	-	Metallophos,STPPase_N
file_1_file_2_19533_t	71139.XP_010043490.1	7.72e-229	629	COG0639@1|root,KOG0374@2759|Eukaryota,37IYN@33090|Viridiplantae,3G8UW@35493|Streptophyta	33090|Viridiplantae	T	serine threonine-protein phosphatase	-	GO:0000164,GO:0003674,GO:0003824,GO:0004721,GO:0004722,GO:0005575,GO:0005622,GO:0005623,GO:0005737,GO:0006464,GO:0006470,GO:0006793,GO:0006796,GO:0006807,GO:0008150,GO:0008152,GO:0008287,GO:0009987,GO:0016311,GO:0016787,GO:0016788,GO:0016791,GO:0019538,GO:0032991,GO:0036211,GO:0042578,GO:0043170,GO:0043412,GO:0044237,GO:0044238,GO:0044260,GO:0044267,GO:0044424,GO:0044444,GO:0044464,GO:0071704,GO:…	3.1.3.16	ko:K06269	ko03015,ko04022,ko04024,ko04113,ko04114,ko04218,ko04261,ko04270,ko04390,ko04510,ko04611,ko04720,ko04728,ko04750,ko04810,ko04910,ko04921,ko04931,ko05031,ko05034,ko05168,ko05205,map03015,map04022,map04024,map04113,map04114,map04218,map04261,map04270,map04390,map04510,map04611,map04720,map04728,map04750,map04810,map04910,map04921,map04931,map05031,map05034,map05168,map05205	-	-	-	ko00000,ko00001,ko01000,ko01009,ko03019,ko03021,ko03041	-	-	-	Metallophos,STPPase_N
file_1_file_1_jg13971.t1	71139.XP_010043485.1	2.3e-222	619	COG1230@1|root,KOG1482@2759|Eukaryota,37M9I@33090|Viridiplantae,3G9VC@35493|Streptophyta	35493|Streptophyta	P	metal tolerance protein	-	GO:0000041,GO:0003674,GO:0005215,GO:0005385,GO:0005575,GO:0005622,GO:0005623,GO:0005737,GO:0005773,GO:0006810,GO:0006811,GO:0006812,GO:0006829,GO:0008150,GO:0008324,GO:0010035,GO:0010038,GO:0010043,GO:0015075,GO:0015318,GO:0016020,GO:0022857,GO:0022890,GO:0030001,GO:0032879,GO:0034220,GO:0042221,GO:0042592,GO:0043226,GO:0043227,GO:0043229,GO:0043231,GO:0044424,GO:0044444,GO:0044464,GO:0046873,GO:…	-	ko:K14689	-	-	-	-	ko00000,ko02000	2.A.4.3.1,2.A.4.3.4	-	-	Cation_efflux
file_1_file_1_jg13972.t1	71139.XP_010043481.1	2.13e-146	413	COG1100@1|root,KOG0087@2759|Eukaryota,37J9I@33090|Viridiplantae,3G78Y@35493|Streptophyta	35493|Streptophyta	U	Ras-related protein	-	GO:0005575,GO:0005622,GO:0005623,GO:0005737,GO:0005768,GO:0005829,GO:0005886,GO:0005911,GO:0008150,GO:0009504,GO:0009506,GO:0009987,GO:0012505,GO:0016020,GO:0030054,GO:0031410,GO:0031982,GO:0042546,GO:0043226,GO:0043227,GO:0043229,GO:0044085,GO:0044424,GO:0044444,GO:0044464,GO:0055044,GO:0071554,GO:0071840,GO:0071944,GO:0097708	-	ko:K07904,ko:K07905,ko:K07976	ko04144,ko04152,ko04961,ko04962,ko04972,map04144,map04152,map04961,map04962,map04972	-	-	-	ko00000,ko00001,ko04031,ko04131,ko04147	-	-	-	Ras
file_1_file_1_jg13973.t1	71139.XP_010043480.1	5.57e-141	402	28H8K@1|root,2QPMB@2759|Eukaryota,37INE@33090|Viridiplantae,3G84Y@35493|Streptophyta	35493|Streptophyta	S	Pentatricopeptide repeat-containing protein	-	GO:0003674,GO:0003676,GO:0003723,GO:0003727,GO:0003729,GO:0003824,GO:0004518,GO:0004519,GO:0005488,GO:0005575,GO:0005622,GO:0005623,GO:0005737,GO:0006139,GO:0006725,GO:0006807,GO:0008150,GO:0008152,GO:0008270,GO:0009451,GO:0009507,GO:0009536,GO:0009987,GO:0016070,GO:0016787,GO:0016788,GO:0034641,GO:0043167,GO:0043169,GO:0043170,GO:0043226,GO:0043227,GO:0043229,GO:0043231,GO:0043412,GO:0044237,GO:…	-	-	-	-	-	-	-	-	-	-	PPR,PPR_2
file_1_file_1_jg13974.t1	71139.XP_010043476.1	9.96e-92	270	2BJ9Y@1|root,2S2FB@2759|Eukaryota,37VEC@33090|Viridiplantae,3GJ85@35493|Streptophyta	35493|Streptophyta	-	-	-	-	-	-	-	-	-	-	-	-	-	-	-
file_1_file_1_jg13975.t1	71139.XP_010043478.1	0	898	COG0438@1|root,2QSX1@2759|Eukaryota,37K8E@33090|Viridiplantae,3G9YY@35493|Streptophyta	35493|Streptophyta	M	Glycosyltransferase Family 4	-	-	-	-	-	-	-	-	-	-	-	-	Glyco_trans_1_4,Glyco_transf_4,Glycos_transf_1
file_1_file_1_jg13976.t1	71139.XP_010043473.1	6.58e-283	779	KOG1192@1|root,KOG1192@2759|Eukaryota,37P6G@33090|Viridiplantae,3GFGJ@35493|Streptophyta	35493|Streptophyta	CG	UDP-glucoronosyl and UDP-glucosyl transferase	-	-	-	-	-	-	-	-	-	-	-	-	UDPGT
file_1_file_1_jg13977.t1	71139.XP_010043472.1	3.07e-276	761	KOG1192@1|root,KOG1192@2759|Eukaryota,37P6G@33090|Viridiplantae,3GH1F@35493|Streptophyta	35493|Streptophyta	CG	UDP-Glycosyltransferase	-	GO:0003674,GO:0003824,GO:0008194,GO:0016740,GO:0016757,GO:0016758,GO:0035251,GO:0046527,GO:0047254	1.14.14.1,2.4.1.202	ko:K07408,ko:K13227,ko:K13493	ko00140,ko00380,ko00402,ko00830,ko00908,ko00980,ko01100,ko01110,ko04913,ko05204,map00140,map00380,map00402,map00830,map00908,map00980,map01100,map01110,map04913,map05204	-	R02354,R02355,R03089,R03408,R03629,R04579,R07000,R07001,R07021,R07022,R07079,R07080,R07081,R07085,R07087,R07098,R07099,R07426,R08075,R08390,R08392,R09418,R09423,R09442	RC00005,RC00046,RC00049,RC00122,RC00661,RC00704,RC00723,RC00724,RC01444,RC01445,RC01727,RC01732,RC01733,RC02531	ko00000,ko00001,ko00199,ko01000,ko01003	-	GT1	-	UDPGT
file_1_file_1_jg13978.t1	71139.XP_010046387.1	4.55e-99	289	COG0071@1|root,KOG0710@2759|Eukaryota	2759|Eukaryota	O	response to heat	-	GO:0000302,GO:0006950,GO:0006979,GO:0008150,GO:0009266,GO:0009314,GO:0009408,GO:0009416,GO:0009628,GO:0009636,GO:0009642,GO:0009644,GO:0010035,GO:0042221,GO:0042493,GO:0042542,GO:0046677,GO:0050896,GO:1901700	-	ko:K13993	ko04141,map04141	-	-	-	ko00000,ko00001,ko03110	-	-	-	HSP20
file_1_file_1_jg13979.t1	71139.XP_010046385.1	1.29e-99	297	29UUN@1|root,2RXJH@2759|Eukaryota,37UB7@33090|Viridiplantae,3GHY3@35493|Streptophyta	35493|Streptophyta	S	PAR1 protein	-	-	-	-	-	-	-	-	-	-	-	-	PAR1
file_1_file_1_jg13980.t1	71139.XP_010046385.1	2.07e-111	322	29UUN@1|root,2RXJH@2759|Eukaryota,37UB7@33090|Viridiplantae,3GHY3@35493|Streptophyta	35493|Streptophyta	S	PAR1 protein	-	-	-	-	-	-	-	-	-	-	-	-	PAR1
file_1_file_1_jg13981.t1	71139.XP_010043469.1	0	904	COG5023@1|root,KOG1375@2759|Eukaryota,37IAA@33090|Viridiplantae,3GEU0@35493|Streptophyta	35493|Streptophyta	Z	Tubulin is the major constituent of microtubules. It binds two moles of GTP, one at an exchangeable site on the beta chain and one at a non-exchangeable site on the alpha chain	-	GO:0005575,GO:0005622,GO:0005623,GO:0005856,GO:0043226,GO:0043228,GO:0043229,GO:0043232,GO:0044424,GO:0044464	-	ko:K07375	ko04145,ko04540,ko05130,map04145,map04540,map05130	-	-	-	ko00000,ko00001,ko03036,ko04147,ko04812	-	-	-	Tubulin,Tubulin_C
file_1_file_1_jg13983.t1	71139.XP_010046384.1	0	1729	KOG0297@1|root,KOG0297@2759|Eukaryota,37RSY@33090|Viridiplantae,3G8U2@35493|Streptophyta	35493|Streptophyta	O	Ring finger	-	GO:0000228,GO:0000793,GO:0000794,GO:0001701,GO:0001756,GO:0001932,GO:0002020,GO:0002791,GO:0002793,GO:0003002,GO:0003007,GO:0003008,GO:0003012,GO:0003013,GO:0003015,GO:0003300,GO:0003674,GO:0003779,GO:0003824,GO:0004672,GO:0004674,GO:0004713,GO:0005198,GO:0005200,GO:0005488,GO:0005509,GO:0005515,GO:0005516,GO:0005575,GO:0005622,GO:0005623,GO:0005634,GO:0005694,GO:0005737,GO:0005856,GO:0005859,GO:…	-	-	-	-	-	-	-	-	-	-	-
file_1_file_2_19548_t	71139.XP_010046384.1	0	1683	KOG0297@1|root,KOG0297@2759|Eukaryota,37RSY@33090|Viridiplantae,3G8U2@35493|Streptophyta	35493|Streptophyta	O	Ring finger	-	GO:0000228,GO:0000793,GO:0000794,GO:0001701,GO:0001756,GO:0001932,GO:0002020,GO:0002791,GO:0002793,GO:0003002,GO:0003007,GO:0003008,GO:0003012,GO:0003013,GO:0003015,GO:0003300,GO:0003674,GO:0003779,GO:0003824,GO:0004672,GO:0004674,GO:0004713,GO:0005198,GO:0005200,GO:0005488,GO:0005509,GO:0005515,GO:0005516,GO:0005575,GO:0005622,GO:0005623,GO:0005634,GO:0005694,GO:0005737,GO:0005856,GO:0005859,GO:…	-	-	-	-	-	-	-	-	-	-	-
file_1_file_1_jg13984.t1	71139.XP_010043468.1	1.34e-206	572	KOG0759@1|root,KOG0753@2759|Eukaryota,37YMY@33090|Viridiplantae,3GH7K@35493|Streptophyta	35493|Streptophyta	C	Belongs to the mitochondrial carrier (TC 2.A.29) family	-	GO:0003333,GO:0003674,GO:0005215,GO:0005342,GO:0005575,GO:0005622,GO:0005623,GO:0005737,GO:0005739,GO:0005740,GO:0005743,GO:0005794,GO:0005886,GO:0006810,GO:0006811,GO:0006812,GO:0006820,GO:0006839,GO:0006865,GO:0006950,GO:0008150,GO:0008152,GO:0008509,GO:0008514,GO:0009266,GO:0009409,GO:0009628,GO:0012505,GO:0015075,GO:0015171,GO:0015318,GO:0015672,GO:0015711,GO:0015849,GO:0016020,GO:0016021,GO:…	-	ko:K15103	-	-	-	-	ko00000,ko02000	2.A.29.3.3,2.A.29.3.4,2.A.29.3.5	-	-	Mito_carr
file_1_file_1_jg13985.t1	71139.XP_010043466.1	1.67e-270	749	28J55@1|root,2QUFA@2759|Eukaryota,37NGP@33090|Viridiplantae,3GDRW@35493|Streptophyta	35493|Streptophyta	S	Plant protein of unknown function (DUF641)	-	GO:0008150,GO:0009314,GO:0009416,GO:0009605,GO:0009606,GO:0009628,GO:0009629,GO:0009630,GO:0009639,GO:0009959,GO:0050896	-	-	-	-	-	-	-	-	-	-	DUF641
file_1_file_1_jg13986.t1	71139.XP_010043464.1	0	2370	COG4581@1|root,KOG0947@2759|Eukaryota,37QN2@33090|Viridiplantae,3G9CD@35493|Streptophyta	35493|Streptophyta	A	helicase	-	GO:0000184,GO:0000288,GO:0000291,GO:0000956,GO:0003674,GO:0003724,GO:0003824,GO:0004004,GO:0004386,GO:0005575,GO:0005622,GO:0005623,GO:0005737,GO:0005773,GO:0005829,GO:0006139,GO:0006401,GO:0006402,GO:0006725,GO:0006807,GO:0006810,GO:0006811,GO:0006812,GO:0006813,GO:0008026,GO:0008150,GO:0008152,GO:0008186,GO:0009056,GO:0009057,GO:0009892,GO:0009987,GO:0010035,GO:0010038,GO:0010468,GO:0010605,GO:…	-	ko:K12599	ko03018,map03018	M00392	-	-	ko00000,ko00001,ko00002,ko01000,ko03019	-	-	-	DEAD,DSHCT,Helicase_C,rRNA_proc-arch
file_1_file_1_jg13986.t2	71139.XP_010043464.1	0	2376	COG4581@1|root,KOG0947@2759|Eukaryota,37QN2@33090|Viridiplantae,3G9CD@35493|Streptophyta	35493|Streptophyta	A	helicase	-	GO:0000184,GO:0000288,GO:0000291,GO:0000956,GO:0003674,GO:0003724,GO:0003824,GO:0004004,GO:0004386,GO:0005575,GO:0005622,GO:0005623,GO:0005737,GO:0005773,GO:0005829,GO:0006139,GO:0006401,GO:0006402,GO:0006725,GO:0006807,GO:0006810,GO:0006811,GO:0006812,GO:0006813,GO:0008026,GO:0008150,GO:0008152,GO:0008186,GO:0009056,GO:0009057,GO:0009892,GO:0009987,GO:0010035,GO:0010038,GO:0010468,GO:0010605,GO:…	-	ko:K12599	ko03018,map03018	M00392	-	-	ko00000,ko00001,ko00002,ko01000,ko03019	-	-	-	DEAD,DSHCT,Helicase_C,rRNA_proc-arch
file_1_file_1_jg13987.t1	71139.XP_010043460.1	0	1599	COG0058@1|root,KOG2099@2759|Eukaryota,37PPE@33090|Viridiplantae,3GCI5@35493|Streptophyta	35493|Streptophyta	G	Phosphorylase is an important allosteric enzyme in carbohydrate metabolism. Enzymes from different sources differ in their regulatory mechanisms and in their natural substrates. However, all known phosphorylases share catalytic and structural properties	-	GO:0000272,GO:0001101,GO:0003674,GO:0003824,GO:0004645,GO:0005488,GO:0005575,GO:0005622,GO:0005623,GO:0005737,GO:0005829,GO:0005975,GO:0005976,GO:0005977,GO:0005980,GO:0006073,GO:0006091,GO:0006112,GO:0006950,GO:0008144,GO:0008150,GO:0008152,GO:0008184,GO:0009056,GO:0009057,GO:0009251,GO:0009414,GO:0009415,GO:0009507,GO:0009536,GO:0009628,GO:0009987,GO:0010035,GO:0010038,GO:0015980,GO:0016052,GO:…	2.4.1.1	ko:K00688	ko00500,ko01100,ko01110,ko02026,ko04217,ko04910,ko04922,ko04931,map00500,map01100,map01110,map02026,map04217,map04910,map04922,map04931	-	R02111	-	ko00000,ko00001,ko01000	-	GT35	-	Phosphorylase
file_1_file_1_jg13987.t2	71139.XP_010043460.1	0	1599	COG0058@1|root,KOG2099@2759|Eukaryota,37PPE@33090|Viridiplantae,3GCI5@35493|Streptophyta	35493|Streptophyta	G	Phosphorylase is an important allosteric enzyme in carbohydrate metabolism. Enzymes from different sources differ in their regulatory mechanisms and in their natural substrates. However, all known phosphorylases share catalytic and structural properties	-	GO:0000272,GO:0001101,GO:0003674,GO:0003824,GO:0004645,GO:0005488,GO:0005575,GO:0005622,GO:0005623,GO:0005737,GO:0005829,GO:0005975,GO:0005976,GO:0005977,GO:0005980,GO:0006073,GO:0006091,GO:0006112,GO:0006950,GO:0008144,GO:0008150,GO:0008152,GO:0008184,GO:0009056,GO:0009057,GO:0009251,GO:0009414,GO:0009415,GO:0009507,GO:0009536,GO:0009628,GO:0009987,GO:0010035,GO:0010038,GO:0015980,GO:0016052,GO:…	2.4.1.1	ko:K00688	ko00500,ko01100,ko01110,ko02026,ko04217,ko04910,ko04922,ko04931,map00500,map01100,map01110,map02026,map04217,map04910,map04922,map04931	-	R02111	-	ko00000,ko00001,ko01000	-	GT35	-	Phosphorylase
file_1_file_1_jg13988.t1	71139.XP_010043459.1	8.55e-287	795	29I3G@1|root,2RRAB@2759|Eukaryota,37SU8@33090|Viridiplantae,3GH9G@35493|Streptophyta	35493|Streptophyta	S	UPF0503 protein At3g09070, chloroplastic-like	-	-	-	-	-	-	-	-	-	-	-	-	DUF740
file_1_file_1_jg13989.t1	71139.XP_010043458.1	5.59e-109	314	2CXI3@1|root,2RXPN@2759|Eukaryota,37U3R@33090|Viridiplantae,3GI6F@35493|Streptophyta	35493|Streptophyta	-	-	-	-	-	-	-	-	-	-	-	-	-	-	-
file_1_file_1_jg13990.t1	71139.XP_010043457.1	0	1125	COG1472@1|root,2QQ55@2759|Eukaryota,37ND7@33090|Viridiplantae,3G8MZ@35493|Streptophyta	35493|Streptophyta	G	Belongs to the glycosyl hydrolase 3 family	-	GO:0000272,GO:0000323,GO:0003674,GO:0003824,GO:0004553,GO:0005575,GO:0005622,GO:0005623,GO:0005737,GO:0005764,GO:0005773,GO:0005886,GO:0005975,GO:0005976,GO:0008150,GO:0008152,GO:0008422,GO:0009056,GO:0009057,GO:0009251,GO:0015926,GO:0016020,GO:0016052,GO:0016787,GO:0016798,GO:0043170,GO:0043226,GO:0043227,GO:0043229,GO:0043231,GO:0044042,GO:0044238,GO:0044424,GO:0044444,GO:0044464,GO:0071704,GO:…	3.2.1.21	ko:K01188,ko:K05349	ko00460,ko00500,ko00940,ko01100,ko01110,map00460,map00500,map00940,map01100,map01110	-	R00026,R02558,R02887,R02985,R03527,R04949,R04998,R10035,R10039,R10040	RC00049,RC00059,RC00171,RC00262,RC00397,RC00451,RC00714,RC00746,RC01248	ko00000,ko00001,ko01000	-	GH1,GH3	-	Glyco_hydro_3,Glyco_hydro_3_C
file_1_file_1_jg13991.t1	71139.XP_010043456.1	0	1355	COG0465@1|root,KOG0731@2759|Eukaryota,37NIU@33090|Viridiplantae,3G9TK@35493|Streptophyta	35493|Streptophyta	O	ATP-dependent zinc metalloprotease FTSH	-	GO:0003674,GO:0003824,GO:0004176,GO:0005575,GO:0005622,GO:0005623,GO:0005737,GO:0005739,GO:0006508,GO:0006807,GO:0008150,GO:0008152,GO:0008233,GO:0008237,GO:0009507,GO:0009526,GO:0009536,GO:0009941,GO:0016462,GO:0016787,GO:0016817,GO:0016818,GO:0016887,GO:0017111,GO:0019538,GO:0031967,GO:0031975,GO:0042623,GO:0043170,GO:0043226,GO:0043227,GO:0043229,GO:0043231,GO:0044238,GO:0044422,GO:0044424,GO:…	-	ko:K03798	-	M00742	-	-	ko00000,ko00002,ko01000,ko01002,ko03110	-	-	-	AAA,FtsH_ext,Peptidase_M41
file_1_file_1_jg13992.t1	71139.XP_010043452.1	0	1180	COG0422@1|root,2QRQ4@2759|Eukaryota,37S1N@33090|Viridiplantae,3GDQN@35493|Streptophyta	35493|Streptophyta	H	Phosphomethylpyrimidine synthase	-	GO:0003674,GO:0003824,GO:0005488,GO:0005515,GO:0005575,GO:0005622,GO:0005623,GO:0005737,GO:0006725,GO:0006766,GO:0006767,GO:0006772,GO:0006790,GO:0006807,GO:0007584,GO:0008150,GO:0008152,GO:0009058,GO:0009110,GO:0009228,GO:0009507,GO:0009532,GO:0009536,GO:0009570,GO:0009605,GO:0009987,GO:0009991,GO:0010033,GO:0010243,GO:0010266,GO:0014070,GO:0016462,GO:0016787,GO:0016817,GO:0016818,GO:0017144,GO:…	4.1.99.17	ko:K03147	ko00730,ko01100,map00730,map01100	M00127	R03472	RC03251,RC03252	ko00000,ko00001,ko00002,ko01000	-	-	-	ThiC-associated,ThiC_Rad_SAM
file_1_file_2_19560_t	71139.XP_010043452.1	0	1275	COG0422@1|root,2QRQ4@2759|Eukaryota,37S1N@33090|Viridiplantae,3GDQN@35493|Streptophyta	35493|Streptophyta	H	Phosphomethylpyrimidine synthase	-	GO:0003674,GO:0003824,GO:0005488,GO:0005515,GO:0005575,GO:0005622,GO:0005623,GO:0005737,GO:0006725,GO:0006766,GO:0006767,GO:0006772,GO:0006790,GO:0006807,GO:0007584,GO:0008150,GO:0008152,GO:0009058,GO:0009110,GO:0009228,GO:0009507,GO:0009532,GO:0009536,GO:0009570,GO:0009605,GO:0009987,GO:0009991,GO:0010033,GO:0010243,GO:0010266,GO:0014070,GO:0016462,GO:0016787,GO:0016817,GO:0016818,GO:0017144,GO:…	4.1.99.17	ko:K03147	ko00730,ko01100,map00730,map01100	M00127	R03472	RC03251,RC03252	ko00000,ko00001,ko00002,ko01000	-	-	-	ThiC-associated,ThiC_Rad_SAM
file_1_file_1_jg13993.t1	71139.XP_010043451.1	3.85e-160	461	2CTX2@1|root,2RI35@2759|Eukaryota,37SZM@33090|Viridiplantae,3GGUT@35493|Streptophyta	35493|Streptophyta	S	Protein kinase C conserved region 2 (CalB)	-	-	-	-	-	-	-	-	-	-	-	-	C2
file_1_file_1_jg13994.t1	71139.XP_010045400.1	1.15e-80	242	KOG3390@1|root,KOG3390@2759|Eukaryota,37VF1@33090|Viridiplantae,3GJMH@35493|Streptophyta	35493|Streptophyta	K	biogenesis of lysosome-related organelles complex 1 subunit	-	GO:0005575,GO:0005622,GO:0005623,GO:0005737,GO:0005739,GO:0005768,GO:0005829,GO:0006810,GO:0007034,GO:0007275,GO:0008150,GO:0012505,GO:0016192,GO:0016197,GO:0022622,GO:0031082,GO:0031083,GO:0031410,GO:0031982,GO:0032501,GO:0032502,GO:0032991,GO:0043226,GO:0043227,GO:0043229,GO:0043231,GO:0044424,GO:0044444,GO:0044445,GO:0044464,GO:0045324,GO:0046907,GO:0048364,GO:0048731,GO:0048856,GO:0051179,GO:…	-	ko:K20185	-	-	-	-	ko00000,ko04131	-	-	-	GCN5L1
file_1_file_1_jg13995.t1	71139.XP_010043449.1	0	984	COG2124@1|root,KOG0157@2759|Eukaryota,37QBG@33090|Viridiplantae,3GAGT@35493|Streptophyta	2759|Eukaryota	Q	cytochrome P450	-	GO:0003674,GO:0003824,GO:0004497,GO:0005575,GO:0005622,GO:0005623,GO:0005737,GO:0005773,GO:0006082,GO:0006629,GO:0006631,GO:0006725,GO:0008150,GO:0008152,GO:0009058,GO:0009698,GO:0009699,GO:0009987,GO:0010345,GO:0016491,GO:0016705,GO:0016713,GO:0018685,GO:0019438,GO:0019748,GO:0019752,GO:0032787,GO:0043226,GO:0043227,GO:0043229,GO:0043231,GO:0043436,GO:0044237,GO:0044238,GO:0044249,GO:0044255,GO:…	-	ko:K15398,ko:K15401,ko:K15402	ko00073,ko01100,map00073,map01100	-	R09451,R09452,R09454	RC00797	ko00000,ko00001,ko00199,ko01000	-	-	-	p450
file_1_file_2_19565_t	71139.XP_010043447.1	9.6e-93	286	COG1474@1|root,KOG2227@2759|Eukaryota,37JC8@33090|Viridiplantae,3GBN4@35493|Streptophyta	35493|Streptophyta	DL	Cell division control protein	CDC6	GO:0006139,GO:0006259,GO:0006260,GO:0006261,GO:0006725,GO:0006807,GO:0007049,GO:0008150,GO:0008152,GO:0009058,GO:0009059,GO:0009987,GO:0022402,GO:0034641,GO:0034645,GO:0042023,GO:0043170,GO:0044237,GO:0044238,GO:0044249,GO:0044260,GO:0044786,GO:0046483,GO:0071704,GO:0090304,GO:1901360,GO:1901576	-	ko:K02213	ko04110,ko04111,ko04113,map04110,map04111,map04113	-	-	-	ko00000,ko00001,ko03032	-	-	-	AAA_22,Cdc6_C
file_1_file_1_jg13996.t1	71139.XP_010043447.1	0	889	COG1474@1|root,KOG2227@2759|Eukaryota,37JC8@33090|Viridiplantae,3GBN4@35493|Streptophyta	35493|Streptophyta	DL	Cell division control protein	CDC6	GO:0006139,GO:0006259,GO:0006260,GO:0006261,GO:0006725,GO:0006807,GO:0007049,GO:0008150,GO:0008152,GO:0009058,GO:0009059,GO:0009987,GO:0022402,GO:0034641,GO:0034645,GO:0042023,GO:0043170,GO:0044237,GO:0044238,GO:0044249,GO:0044260,GO:0044786,GO:0046483,GO:0071704,GO:0090304,GO:1901360,GO:1901576	-	ko:K02213	ko04110,ko04111,ko04113,map04110,map04111,map04113	-	-	-	ko00000,ko00001,ko03032	-	-	-	AAA_22,Cdc6_C
file_1_file_1_jg13997.t1	71139.XP_010046381.1	0	1024	COG0147@1|root,KOG1223@2759|Eukaryota,37PW6@33090|Viridiplantae,3G7PU@35493|Streptophyta	35493|Streptophyta	E	Anthranilate synthase	ASA2	GO:0000162,GO:0003674,GO:0003824,GO:0004049,GO:0005575,GO:0005622,GO:0005623,GO:0005737,GO:0005950,GO:0006082,GO:0006520,GO:0006568,GO:0006576,GO:0006586,GO:0006725,GO:0006807,GO:0008150,GO:0008152,GO:0008652,GO:0009058,GO:0009072,GO:0009073,GO:0009308,GO:0009309,GO:0009507,GO:0009536,GO:0009987,GO:0016053,GO:0016829,GO:0016830,GO:0016833,GO:0018130,GO:0019438,GO:0019752,GO:0032991,GO:0034641,GO:…	4.1.3.27	ko:K01657	ko00400,ko00405,ko01100,ko01110,ko01130,ko01230,ko02024,ko02025,map00400,map00405,map01100,map01110,map01130,map01230,map02024,map02025	M00023	R00985,R00986	RC00010,RC02148,RC02414	ko00000,ko00001,ko00002,ko01000	-	-	-	Anth_synt_I_N,Chorismate_bind
file_1_file_1_jg13999.t1	71139.XP_010043444.1	6.87e-137	388	COG0655@1|root,KOG3135@2759|Eukaryota,37MVJ@33090|Viridiplantae,3GEP2@35493|Streptophyta	35493|Streptophyta	S	Minor allergen Alt a	-	GO:0000166,GO:0003674,GO:0003824,GO:0003955,GO:0005488,GO:0005575,GO:0005622,GO:0005623,GO:0005737,GO:0005886,GO:0006091,GO:0008150,GO:0008152,GO:0009055,GO:0009987,GO:0010181,GO:0016020,GO:0016491,GO:0016651,GO:0016655,GO:0022900,GO:0032553,GO:0036094,GO:0043167,GO:0043168,GO:0044237,GO:0044424,GO:0044464,GO:0048037,GO:0050662,GO:0055114,GO:0071944,GO:0097159,GO:0097367,GO:1901265,GO:1901363	1.6.5.2	ko:K03809	ko00130,ko01110,map00130,map01110	-	R02964,R03643,R03816	RC00819	ko00000,ko00001,ko01000	-	-	-	FMN_red
file_1_file_2_19569_t	71139.XP_010043444.1	7.38e-100	292	COG0655@1|root,KOG3135@2759|Eukaryota,37MVJ@33090|Viridiplantae,3GEP2@35493|Streptophyta	35493|Streptophyta	S	Minor allergen Alt a	-	GO:0000166,GO:0003674,GO:0003824,GO:0003955,GO:0005488,GO:0005575,GO:0005622,GO:0005623,GO:0005737,GO:0005886,GO:0006091,GO:0008150,GO:0008152,GO:0009055,GO:0009987,GO:0010181,GO:0016020,GO:0016491,GO:0016651,GO:0016655,GO:0022900,GO:0032553,GO:0036094,GO:0043167,GO:0043168,GO:0044237,GO:0044424,GO:0044464,GO:0048037,GO:0050662,GO:0055114,GO:0071944,GO:0097159,GO:0097367,GO:1901265,GO:1901363	1.6.5.2	ko:K03809	ko00130,ko01110,map00130,map01110	-	R02964,R03643,R03816	RC00819	ko00000,ko00001,ko01000	-	-	-	FMN_red
file_1_file_1_jg14000.t1	71139.XP_010043443.1	4.45e-99	287	29TN5@1|root,2RXGP@2759|Eukaryota,388U2@33090|Viridiplantae,3GIGK@35493|Streptophyta	35493|Streptophyta	T	Pleckstrin homology domain-containing protein	-	GO:0003674,GO:0005488,GO:0005543,GO:0008289,GO:0032266,GO:0035091,GO:0043167,GO:0043168,GO:1901981	-	-	-	-	-	-	-	-	-	-	PH
file_1_file_1_jg14001.t1	71139.XP_010043439.1	1.25e-158	454	KOG0126@1|root,KOG0126@2759|Eukaryota,37HZA@33090|Viridiplantae,3G9CC@35493|Streptophyta	35493|Streptophyta	A	zinc finger CCCH domain-containing protein	-	GO:0000375,GO:0000377,GO:0000398,GO:0003674,GO:0003676,GO:0003723,GO:0005488,GO:0005575,GO:0005622,GO:0005623,GO:0005634,GO:0005654,GO:0005681,GO:0005686,GO:0006139,GO:0006396,GO:0006397,GO:0006403,GO:0006405,GO:0006406,GO:0006611,GO:0006725,GO:0006807,GO:0006810,GO:0006886,GO:0006913,GO:0008104,GO:0008150,GO:0008152,GO:0008380,GO:0009987,GO:0010467,GO:0015031,GO:0015833,GO:0015931,GO:0016070,GO:…	-	ko:K13107	-	-	-	-	ko00000,ko03041	-	-	-	RRM_1,zf-CCCH
file_1_file_1_jg14002.t1	71139.XP_010061767.1	2.9e-231	638	COG0468@1|root,KOG1434@2759|Eukaryota,37MFT@33090|Viridiplantae,3GAKY@35493|Streptophyta	35493|Streptophyta	DL	Belongs to the RecA family	dmc1	GO:0000003,GO:0000150,GO:0000217,GO:0000228,GO:0000280,GO:0000400,GO:0000724,GO:0000725,GO:0000730,GO:0000793,GO:0000794,GO:0003674,GO:0003676,GO:0003677,GO:0003690,GO:0003697,GO:0003824,GO:0005488,GO:0005575,GO:0005622,GO:0005623,GO:0005634,GO:0005654,GO:0005694,GO:0006139,GO:0006259,GO:0006281,GO:0006302,GO:0006310,GO:0006312,GO:0006725,GO:0006807,GO:0006950,GO:0006974,GO:0006996,GO:0007049,GO:…	-	ko:K10872	ko04113,map04113	-	-	-	ko00000,ko00001,ko03400	-	-	-	Rad51
file_1_file_1_jg14003.t2	71139.XP_010034388.1	8.4e-21	89	2CAXN@1|root,2QT9K@2759|Eukaryota,37QMY@33090|Viridiplantae,3G9I1@35493|Streptophyta	35493|Streptophyta	S	Stem-specific protein	-	-	-	-	-	-	-	-	-	-	-	-	DUF3700
file_1_file_1_jg14003.t1	71139.XP_010042726.1	1.52e-34	121	2CAXN@1|root,2QT9K@2759|Eukaryota,37QMY@33090|Viridiplantae,3G9I1@35493|Streptophyta	35493|Streptophyta	S	Stem-specific protein	-	-	-	-	-	-	-	-	-	-	-	-	DUF3700
file_1_file_1_jg14004.t1	71139.XP_010043438.1	0	1631	KOG0443@1|root,KOG0443@2759|Eukaryota,37S5D@33090|Viridiplantae,3GF6C@35493|Streptophyta	35493|Streptophyta	Z	actin filament capping	VLN1	GO:0003674,GO:0003779,GO:0005488,GO:0005515,GO:0005575,GO:0005622,GO:0005623,GO:0005856,GO:0006996,GO:0007010,GO:0007015,GO:0008064,GO:0008092,GO:0008150,GO:0009987,GO:0010639,GO:0015629,GO:0016043,GO:0030029,GO:0030036,GO:0030832,GO:0030833,GO:0030834,GO:0030835,GO:0030837,GO:0031333,GO:0032271,GO:0032272,GO:0032432,GO:0032535,GO:0032956,GO:0032970,GO:0033043,GO:0043226,GO:0043228,GO:0043229,GO:…	-	ko:K05761,ko:K05768,ko:K08017	ko04666,ko04810,ko05203,map04666,map04810,map05203	-	-	-	ko00000,ko00001,ko04147,ko04812	-	-	-	Gelsolin,VHP
file_1_file_1_jg14006.t1	71139.XP_010043437.1	0	989	COG3511@1|root,2QPJ0@2759|Eukaryota,37HUZ@33090|Viridiplantae,3GH2N@35493|Streptophyta	35493|Streptophyta	M	non-specific phospholipase	-	GO:0003674,GO:0003824,GO:0003993,GO:0004620,GO:0004629,GO:0006629,GO:0006644,GO:0006793,GO:0006796,GO:0008081,GO:0008150,GO:0008152,GO:0009056,GO:0009395,GO:0009405,GO:0009987,GO:0016042,GO:0016298,GO:0016311,GO:0016787,GO:0016788,GO:0016791,GO:0019637,GO:0034480,GO:0035821,GO:0042578,GO:0044003,GO:0044237,GO:0044238,GO:0044242,GO:0044248,GO:0044255,GO:0044403,GO:0044419,GO:0046434,GO:0051701,GO:…	3.1.4.3	ko:K01114	ko00562,ko00564,ko00565,ko01100,ko01110,ko02024,ko04919,map00562,map00564,map00565,map01100,map01110,map02024,map04919	-	R01312,R02027,R02052,R03332,R07381	RC00017,RC00425	ko00000,ko00001,ko01000,ko02042	-	-	-	Phosphoesterase
file_1_file_1_jg14007.t1	71139.XP_010043436.1	0	961	KOG4328@1|root,KOG4328@2759|Eukaryota,37P4Y@33090|Viridiplantae,3GB40@35493|Streptophyta	35493|Streptophyta	S	Protein DAMAGED DNA-BINDING	DDB2	GO:0000151,GO:0003674,GO:0003676,GO:0003677,GO:0003684,GO:0005488,GO:0005575,GO:0005622,GO:0005623,GO:0005634,GO:0006139,GO:0006259,GO:0006281,GO:0006725,GO:0006807,GO:0006950,GO:0006974,GO:0008150,GO:0008152,GO:0009314,GO:0009411,GO:0009416,GO:0009628,GO:0009987,GO:0010224,GO:0031461,GO:0032991,GO:0033554,GO:0034641,GO:0043170,GO:0043226,GO:0043227,GO:0043229,GO:0043231,GO:0044237,GO:0044238,GO:…	-	ko:K10140	ko03420,ko04115,ko04120,ko05161,ko05200,ko05202,ko05210,ko05212,ko05213,ko05214,ko05216,ko05217,ko05218,ko05220,ko05222,ko05223,ko05224,ko05225,ko05226,map03420,map04115,map04120,map05161,map05200,map05202,map05210,map05212,map05213,map05214,map05216,map05217,map05218,map05220,map05222,map05223,map05224,map05225,map05226	M00385	-	-	ko00000,ko00001,ko00002,ko03400,ko04121	-	-	-	WD40
file_1_file_1_jg14008.t1	71139.XP_010043435.1	3.18e-261	716	28Q08@1|root,2QWNW@2759|Eukaryota,37MNC@33090|Viridiplantae,3GBX2@35493|Streptophyta	35493|Streptophyta	S	3-oxo-Delta(45)-steroid	-	-	1.3.1.3	ko:K22419	-	-	-	-	ko00000,ko01000	-	-	-	Epimerase
file_1_file_1_jg14009.t1	71139.XP_010043433.1	7.34e-293	803	COG0387@1|root,KOG1397@2759|Eukaryota,37RZV@33090|Viridiplantae,3GCCE@35493|Streptophyta	35493|Streptophyta	P	Belongs to the Ca(2 ) cation antiporter (CaCA) (TC 2.A.19) family	-	GO:0000325,GO:0003674,GO:0005215,GO:0005575,GO:0005622,GO:0005623,GO:0005737,GO:0005773,GO:0005774,GO:0006793,GO:0006810,GO:0006811,GO:0006812,GO:0006816,GO:0006873,GO:0006874,GO:0006875,GO:0006882,GO:0008150,GO:0008152,GO:0008324,GO:0009605,GO:0009607,GO:0009624,GO:0009705,GO:0009987,GO:0010035,GO:0010038,GO:0015075,GO:0015077,GO:0015078,GO:0015085,GO:0015291,GO:0015297,GO:0015298,GO:0015299,GO:…	-	ko:K07300	-	-	-	-	ko00000,ko02000	2.A.19	-	-	Na_Ca_ex
file_1_file_2_19581_t	71139.XP_010043433.1	5.21e-63	205	COG0387@1|root,KOG1397@2759|Eukaryota,37RZV@33090|Viridiplantae,3GCCE@35493|Streptophyta	35493|Streptophyta	P	Belongs to the Ca(2 ) cation antiporter (CaCA) (TC 2.A.19) family	-	GO:0000325,GO:0003674,GO:0005215,GO:0005575,GO:0005622,GO:0005623,GO:0005737,GO:0005773,GO:0005774,GO:0006793,GO:0006810,GO:0006811,GO:0006812,GO:0006816,GO:0006873,GO:0006874,GO:0006875,GO:0006882,GO:0008150,GO:0008152,GO:0008324,GO:0009605,GO:0009607,GO:0009624,GO:0009705,GO:0009987,GO:0010035,GO:0010038,GO:0015075,GO:0015077,GO:0015078,GO:0015085,GO:0015291,GO:0015297,GO:0015298,GO:0015299,GO:…	-	ko:K07300	-	-	-	-	ko00000,ko02000	2.A.19	-	-	Na_Ca_ex
file_1_file_1_jg14010.t1	71139.XP_010043432.1	6.86e-38	131	KOG2265@1|root,KOG2265@2759|Eukaryota,37M4C@33090|Viridiplantae,3GDIW@35493|Streptophyta	35493|Streptophyta	T	nudC domain-containing protein	-	-	-	-	-	-	-	-	-	-	-	-	CS
file_1_file_1_jg14011.t1	71139.XP_010043431.1	2.43e-216	602	COG0524@1|root,KOG2855@2759|Eukaryota,37KB4@33090|Viridiplantae,3G8Q3@35493|Streptophyta	35493|Streptophyta	G	carbohydrate kinase family protein	-	GO:0003674,GO:0003824,GO:0006066,GO:0006793,GO:0006796,GO:0008150,GO:0008152,GO:0009058,GO:0009987,GO:0010264,GO:0016301,GO:0016310,GO:0016740,GO:0016772,GO:0016773,GO:0017144,GO:0019140,GO:0019637,GO:0019751,GO:0032958,GO:0033517,GO:0043647,GO:0044237,GO:0044281,GO:0044283,GO:0046165,GO:0046173,GO:0071704,GO:0090407,GO:1901576,GO:1901615,GO:1901617	2.7.1.64	ko:K19517	ko00562,ko01100,map00562,map01100	-	R07279	RC00002,RC00078	ko00000,ko00001,ko01000	-	-	-	PfkB
file_1_file_1_jg14012.t1	71139.XP_010043430.1	1.7e-34	129	COG0652@1|root,KOG0865@2759|Eukaryota,37MAX@33090|Viridiplantae,3GAUA@35493|Streptophyta	35493|Streptophyta	O	PPIases accelerate the folding of proteins. It catalyzes the cis-trans isomerization of proline imidic peptide bonds in oligopeptides	-	GO:0000413,GO:0003674,GO:0003755,GO:0003824,GO:0005488,GO:0005575,GO:0005622,GO:0005623,GO:0005737,GO:0005768,GO:0005770,GO:0005771,GO:0005783,GO:0005794,GO:0005795,GO:0005829,GO:0005911,GO:0006464,GO:0006807,GO:0007275,GO:0008144,GO:0008150,GO:0008152,GO:0009506,GO:0009507,GO:0009536,GO:0009987,GO:0012505,GO:0016018,GO:0016020,GO:0016853,GO:0016859,GO:0018193,GO:0018208,GO:0019538,GO:0022622,GO:…	5.2.1.8	ko:K01802	-	-	-	-	ko00000,ko01000	-	-	-	Pro_isomerase
file_1_file_1_jg14013.t1	71139.XP_010043429.1	7.94e-205	574	COG0214@1|root,KOG1606@2759|Eukaryota,37KWB@33090|Viridiplantae,3G7GA@35493|Streptophyta	35493|Streptophyta	H	Belongs to the PdxS SNZ family	-	GO:0003674,GO:0005488,GO:0005515,GO:0005575,GO:0005622,GO:0005623,GO:0005737,GO:0005829,GO:0005886,GO:0006082,GO:0006520,GO:0006725,GO:0006778,GO:0006807,GO:0006950,GO:0006970,GO:0006972,GO:0006979,GO:0006982,GO:0008150,GO:0008152,GO:0009314,GO:0009411,GO:0009416,GO:0009628,GO:0009651,GO:0009987,GO:0010033,GO:0010224,GO:0010335,GO:0012505,GO:0015994,GO:0016020,GO:0019752,GO:0033013,GO:0033194,GO:…	4.3.3.6	ko:K06215	ko00750,map00750	-	R07456	RC00010,RC01783,RC03043	ko00000,ko00001,ko01000	-	-	-	SOR_SNZ
file_1_file_1_jg14014.t1	71139.XP_010043428.1	0	1063	KOG0169@1|root,KOG0169@2759|Eukaryota,37JZJ@33090|Viridiplantae,3G7IB@35493|Streptophyta	35493|Streptophyta	I	Phosphoinositide phospholipase C	-	-	3.1.4.11	ko:K05857	ko00562,ko01100,ko04020,ko04070,ko04919,ko04933,map00562,map01100,map04020,map04070,map04919,map04933	M00130	R03332,R03435,R10952	RC00017,RC00425	ko00000,ko00001,ko00002,ko01000,ko04131	-	-	-	C2,EF-hand_like,PI-PLC-X,PI-PLC-Y
file_1_file_1_jg14015.t1	71139.XP_010043426.1	1.8e-273	776	COG0515@1|root,KOG1187@2759|Eukaryota,37T7U@33090|Viridiplantae,3GHT6@35493|Streptophyta	35493|Streptophyta	T	Serine threonine-protein kinase-like protein	-	GO:0003674,GO:0005488,GO:0005515,GO:0042802,GO:0042803,GO:0046983	2.7.11.1	ko:K04733	ko04010,ko04064,ko04620,ko04621,ko04624,ko04722,ko05133,ko05140,ko05142,ko05145,ko05152,ko05162,ko05164,map04010,map04064,map04620,map04621,map04624,map04722,map05133,map05140,map05142,map05145,map05152,map05162,map05164	M00686	-	-	ko00000,ko00001,ko00002,ko01000,ko01001	-	-	-	Pkinase,RCC1_2
file_1_file_1_jg14016.t1	71139.XP_010043425.1	3.32e-182	517	2BXNR@1|root,2RYD5@2759|Eukaryota,37U8P@33090|Viridiplantae,3GHIB@35493|Streptophyta	35493|Streptophyta	S	DUF761-associated sequence motif	-	-	-	-	-	-	-	-	-	-	-	-	VARLMGL
file_1_file_1_jg14017.t1	71139.XP_010043424.1	0	1671	KOG0167@1|root,KOG0167@2759|Eukaryota,37NDP@33090|Viridiplantae,3G7I5@35493|Streptophyta	35493|Streptophyta	S	RING-type E3 ubiquitin transferase	-	GO:0005575,GO:0005623,GO:0005886,GO:0016020,GO:0044464,GO:0071944	-	-	-	-	-	-	-	-	-	-	Arm,U-box
file_1_file_1_jg14019.t1	71139.XP_010043423.1	2.38e-126	367	KOG3286@1|root,KOG3286@2759|Eukaryota,37RBF@33090|Viridiplantae,3G8IM@35493|Streptophyta	35493|Streptophyta	S	SelT-like protein	-	-	-	ko:K22366	-	-	-	-	ko00000	-	-	-	Rdx
file_1_file_1_jg14020.t1	3694.POPTR_0001s28420.1	7.67e-09	54.7	2E82B@1|root,2SEJX@2759|Eukaryota,37XR6@33090|Viridiplantae,3GMHS@35493|Streptophyta,4JV5U@91835|fabids	35493|Streptophyta	-	-	-	-	-	-	-	-	-	-	-	-	-	-	-
file_1_file_1_jg14021.t1	71139.XP_010043419.1	1.08e-192	541	COG3491@1|root,KOG0143@2759|Eukaryota,37HQ5@33090|Viridiplantae,3GD5D@35493|Streptophyta	35493|Streptophyta	Q	Belongs to the iron ascorbate-dependent oxidoreductase family	-	GO:0003674,GO:0003824,GO:0006082,GO:0006629,GO:0006720,GO:0006721,GO:0008150,GO:0008152,GO:0009685,GO:0009987,GO:0010817,GO:0016101,GO:0016491,GO:0016705,GO:0016706,GO:0019752,GO:0042445,GO:0043436,GO:0044237,GO:0044238,GO:0044255,GO:0044281,GO:0045543,GO:0051213,GO:0052635,GO:0055114,GO:0065007,GO:0065008,GO:0071704	-	-	-	-	-	-	-	-	-	-	2OG-FeII_Oxy,DIOX_N
file_1_file_2_19591_t	71139.XP_010043419.1	2.27e-171	486	COG3491@1|root,KOG0143@2759|Eukaryota,37HQ5@33090|Viridiplantae,3GD5D@35493|Streptophyta	35493|Streptophyta	Q	Belongs to the iron ascorbate-dependent oxidoreductase family	-	GO:0003674,GO:0003824,GO:0006082,GO:0006629,GO:0006720,GO:0006721,GO:0008150,GO:0008152,GO:0009685,GO:0009987,GO:0010817,GO:0016101,GO:0016491,GO:0016705,GO:0016706,GO:0019752,GO:0042445,GO:0043436,GO:0044237,GO:0044238,GO:0044255,GO:0044281,GO:0045543,GO:0051213,GO:0052635,GO:0055114,GO:0065007,GO:0065008,GO:0071704	-	-	-	-	-	-	-	-	-	-	2OG-FeII_Oxy,DIOX_N
file_1_file_1_jg14022.t1	71139.XP_010046377.1	0	2064	28MCH@1|root,2QTVY@2759|Eukaryota,37MND@33090|Viridiplantae,3G9UY@35493|Streptophyta	35493|Streptophyta	S	Acyl-CoA N-acyltransferase with RING FYVE PHD-type zinc finger protein	-	GO:0000118,GO:0000122,GO:0000228,GO:0000785,GO:0000790,GO:0000976,GO:0000977,GO:0001012,GO:0001067,GO:0001085,GO:0001103,GO:0003674,GO:0003676,GO:0003677,GO:0003678,GO:0003682,GO:0003690,GO:0003712,GO:0003714,GO:0003824,GO:0004003,GO:0004386,GO:0004407,GO:0005488,GO:0005515,GO:0005575,GO:0005622,GO:0005623,GO:0005634,GO:0005654,GO:0005694,GO:0005737,GO:0005813,GO:0005815,GO:0005856,GO:0006325,GO:…	-	-	-	-	-	-	-	-	-	-	Acetyltransf_1,Agenet,Jas,PHD
file_1_file_2_19593_t	71139.XP_010043417.1	2.11e-148	426	28K4X@1|root,2QR9P@2759|Eukaryota,37PM7@33090|Viridiplantae,3G9H7@35493|Streptophyta	35493|Streptophyta	S	PMR5-like	-	GO:0003674,GO:0003824,GO:0005575,GO:0005622,GO:0005623,GO:0005737,GO:0005783,GO:0005794,GO:0008150,GO:0008374,GO:0009605,GO:0009607,GO:0009620,GO:0009987,GO:0012505,GO:0016407,GO:0016413,GO:0016740,GO:0016746,GO:0016747,GO:0043207,GO:0043226,GO:0043227,GO:0043229,GO:0043231,GO:0044424,GO:0044444,GO:0044464,GO:0050896,GO:0051704,GO:0051707,GO:0071554	-	-	-	-	-	-	-	-	-	-	PC-Esterase,PMR5N
file_1_file_1_jg14023.t1	71139.XP_010043417.1	9.66e-274	750	28K4X@1|root,2QR9P@2759|Eukaryota,37PM7@33090|Viridiplantae,3G9H7@35493|Streptophyta	35493|Streptophyta	S	PMR5-like	-	GO:0003674,GO:0003824,GO:0005575,GO:0005622,GO:0005623,GO:0005737,GO:0005783,GO:0005794,GO:0008150,GO:0008374,GO:0009605,GO:0009607,GO:0009620,GO:0009987,GO:0012505,GO:0016407,GO:0016413,GO:0016740,GO:0016746,GO:0016747,GO:0043207,GO:0043226,GO:0043227,GO:0043229,GO:0043231,GO:0044424,GO:0044444,GO:0044464,GO:0050896,GO:0051704,GO:0051707,GO:0071554	-	-	-	-	-	-	-	-	-	-	PC-Esterase,PMR5N
file_1_file_2_19594_t	71139.XP_010043417.1	2.55e-111	329	28K4X@1|root,2QR9P@2759|Eukaryota,37PM7@33090|Viridiplantae,3G9H7@35493|Streptophyta	35493|Streptophyta	S	PMR5-like	-	GO:0003674,GO:0003824,GO:0005575,GO:0005622,GO:0005623,GO:0005737,GO:0005783,GO:0005794,GO:0008150,GO:0008374,GO:0009605,GO:0009607,GO:0009620,GO:0009987,GO:0012505,GO:0016407,GO:0016413,GO:0016740,GO:0016746,GO:0016747,GO:0043207,GO:0043226,GO:0043227,GO:0043229,GO:0043231,GO:0044424,GO:0044444,GO:0044464,GO:0050896,GO:0051704,GO:0051707,GO:0071554	-	-	-	-	-	-	-	-	-	-	PC-Esterase,PMR5N
file_1_file_1_jg14024.t1	71139.XP_010043416.1	0	1141	COG0367@1|root,KOG0571@2759|Eukaryota,37JXE@33090|Viridiplantae,3GEJM@35493|Streptophyta	35493|Streptophyta	E	asparagine synthetase	-	GO:0003674,GO:0003824,GO:0004066,GO:0005488,GO:0005515,GO:0006082,GO:0006520,GO:0006528,GO:0006529,GO:0006807,GO:0006950,GO:0007154,GO:0008150,GO:0008152,GO:0008652,GO:0009056,GO:0009058,GO:0009063,GO:0009066,GO:0009067,GO:0009267,GO:0009314,GO:0009416,GO:0009605,GO:0009628,GO:0009642,GO:0009646,GO:0009743,GO:0009744,GO:0009746,GO:0009749,GO:0009750,GO:0009987,GO:0009991,GO:0010033,GO:0016053,GO:…	6.3.5.4	ko:K01953	ko00250,ko01100,ko01110,map00250,map01100,map01110	-	R00578	RC00010	ko00000,ko00001,ko01000,ko01002	-	-	-	Asn_synthase,GATase_7
file_1_file_1_jg14026.t1	71139.XP_010043414.1	1.25e-213	598	COG0631@1|root,KOG0698@2759|Eukaryota,37JA2@33090|Viridiplantae,3G7CQ@35493|Streptophyta	35493|Streptophyta	T	phosphatase 2C	-	GO:0001101,GO:0003674,GO:0003824,GO:0004721,GO:0004722,GO:0005575,GO:0005622,GO:0005623,GO:0005737,GO:0006464,GO:0006470,GO:0006793,GO:0006796,GO:0006807,GO:0006950,GO:0006952,GO:0007154,GO:0007165,GO:0008150,GO:0008152,GO:0009536,GO:0009605,GO:0009607,GO:0009611,GO:0009620,GO:0009719,GO:0009725,GO:0009737,GO:0009738,GO:0009755,GO:0009987,GO:0010033,GO:0016311,GO:0016787,GO:0016788,GO:0016791,GO:…	3.1.3.16	ko:K17506	-	-	-	-	ko00000,ko01000,ko01009	-	-	-	PP2C
file_1_file_1_jg14027.t1	71139.XP_010046376.1	6.41e-243	680	KOG0198@1|root,KOG0198@2759|Eukaryota,37M7U@33090|Viridiplantae,3GFGU@35493|Streptophyta	35493|Streptophyta	T	belongs to the protein kinase superfamily	-	GO:0000003,GO:0000165,GO:0000186,GO:0000746,GO:0000747,GO:0000749,GO:0000750,GO:0000935,GO:0001932,GO:0001934,GO:0003674,GO:0003824,GO:0004672,GO:0004674,GO:0004709,GO:0005575,GO:0005622,GO:0005623,GO:0005737,GO:0005886,GO:0006464,GO:0006468,GO:0006793,GO:0006796,GO:0006807,GO:0006950,GO:0007154,GO:0007165,GO:0007186,GO:0008150,GO:0008152,GO:0009893,GO:0009966,GO:0009967,GO:0009987,GO:0010033,GO:…	-	-	-	-	-	-	-	-	-	-	Pkinase
file_1_file_1_jg14028.t1	71139.XP_010043413.1	2.87e-127	365	COG5171@1|root,KOG0864@2759|Eukaryota,37S4Z@33090|Viridiplantae,3G8DW@35493|Streptophyta	35493|Streptophyta	U	Ran-binding protein 1 homolog	-	GO:0000060,GO:0000082,GO:0000226,GO:0000278,GO:0003674,GO:0005488,GO:0005515,GO:0005575,GO:0005622,GO:0005623,GO:0005634,GO:0005737,GO:0006403,GO:0006405,GO:0006508,GO:0006511,GO:0006606,GO:0006807,GO:0006810,GO:0006886,GO:0006913,GO:0006996,GO:0007010,GO:0007017,GO:0007049,GO:0007051,GO:0008104,GO:0008150,GO:0008152,GO:0008536,GO:0009056,GO:0009057,GO:0009987,GO:0015031,GO:0015833,GO:0015931,GO:…	-	ko:K15306	ko05166,ko05203,map05166,map05203	-	-	-	ko00000,ko00001	-	-	-	Ran_BP1
file_1_file_1_jg14029.t1	71139.XP_010046375.1	1.45e-289	810	COG3158@1|root,2QPSA@2759|Eukaryota,37Q41@33090|Viridiplantae,3G8XC@35493|Streptophyta	35493|Streptophyta	P	Potassium transporter	-	GO:0003674,GO:0005215,GO:0005575,GO:0005623,GO:0005886,GO:0006810,GO:0006811,GO:0006812,GO:0006813,GO:0008150,GO:0008324,GO:0009987,GO:0015075,GO:0015077,GO:0015079,GO:0015318,GO:0015672,GO:0016020,GO:0022857,GO:0022890,GO:0030001,GO:0034220,GO:0044464,GO:0046873,GO:0051179,GO:0051234,GO:0055085,GO:0071804,GO:0071805,GO:0071944,GO:0098655,GO:0098660,GO:0098662	-	ko:K03549	-	-	-	-	ko00000,ko02000	2.A.72	-	-	K_trans
file_1_file_1_jg14030.t1	71139.XP_010043412.1	3.51e-210	584	KOG1558@1|root,KOG1558@2759|Eukaryota,37SJU@33090|Viridiplantae,3GEU4@35493|Streptophyta	35493|Streptophyta	P	zinc transporter 6	ZIP6	GO:0000041,GO:0003674,GO:0005215,GO:0005385,GO:0005575,GO:0005623,GO:0005886,GO:0006810,GO:0006811,GO:0006812,GO:0006829,GO:0008150,GO:0008324,GO:0009605,GO:0009607,GO:0009624,GO:0015075,GO:0015318,GO:0016020,GO:0022857,GO:0022890,GO:0030001,GO:0034220,GO:0043207,GO:0044464,GO:0046873,GO:0046915,GO:0050896,GO:0051179,GO:0051234,GO:0051704,GO:0051707,GO:0055085,GO:0070838,GO:0071577,GO:0071944,GO:…	-	ko:K14709	-	-	-	-	ko00000,ko02000	2.A.5.1,2.A.5.3,2.A.5.6	-	-	Zip
file_1_file_1_jg14031.t1	71139.XP_010043411.1	1.37e-268	737	28I1Z@1|root,2QWM2@2759|Eukaryota,37QHZ@33090|Viridiplantae,3GH7N@35493|Streptophyta	35493|Streptophyta	S	N-acetyltransferase	-	-	-	-	-	-	-	-	-	-	-	-	Acetyltransf_1
file_1_file_1_jg14032.t1	71139.XP_010043409.1	1.02e-85	256	KOG2612@1|root,KOG2612@2759|Eukaryota,37MU1@33090|Viridiplantae,3GFQA@35493|Streptophyta	35493|Streptophyta	K	SAGA-associated factor 11	-	-	-	ko:K11363	-	-	-	-	ko00000,ko03021,ko03036	-	-	-	Sgf11
file_1_file_1_jg14033.t1	2711.XP_006488561.1	2.85e-11	62.4	2C5KR@1|root,2SBV1@2759|Eukaryota,37XPI@33090|Viridiplantae,3GMNK@35493|Streptophyta	35493|Streptophyta	-	-	-	-	-	-	-	-	-	-	-	-	-	-	-
file_1_file_1_jg14034.t1	71139.XP_010043408.1	0	917	28JKY@1|root,2QS05@2759|Eukaryota,37QJN@33090|Viridiplantae,3G7ZX@35493|Streptophyta	35493|Streptophyta	S	Pentatricopeptide repeat-containing protein At2g30100	-	GO:0003674,GO:0003676,GO:0003723,GO:0003824,GO:0004518,GO:0004519,GO:0005488,GO:0005575,GO:0005622,GO:0005623,GO:0006139,GO:0006725,GO:0006807,GO:0008150,GO:0008152,GO:0009451,GO:0009987,GO:0016070,GO:0016787,GO:0016788,GO:0034641,GO:0043170,GO:0043226,GO:0043227,GO:0043229,GO:0043231,GO:0043412,GO:0044237,GO:0044238,GO:0044424,GO:0044464,GO:0046483,GO:0071704,GO:0090304,GO:0090305,GO:0097159,GO:…	-	-	-	-	-	-	-	-	-	-	PPR
file_1_file_1_jg14035.t1	71139.XP_010043407.1	0	1002	COG0515@1|root,2QQVC@2759|Eukaryota,37K4S@33090|Viridiplantae,3GCTY@35493|Streptophyta	35493|Streptophyta	T	receptor-like serine threonine-protein kinase	-	-	2.7.11.1	ko:K04733	ko04010,ko04064,ko04620,ko04621,ko04624,ko04722,ko05133,ko05140,ko05142,ko05145,ko05152,ko05162,ko05164,map04010,map04064,map04620,map04621,map04624,map04722,map05133,map05140,map05142,map05145,map05152,map05162,map05164	M00686	-	-	ko00000,ko00001,ko00002,ko01000,ko01001	-	-	-	LRRNT_2,LRR_8,Pkinase_Tyr
file_1_file_2_19611_t	71139.XP_010043407.1	0	1021	COG0515@1|root,2QQVC@2759|Eukaryota,37K4S@33090|Viridiplantae,3GCTY@35493|Streptophyta	35493|Streptophyta	T	receptor-like serine threonine-protein kinase	-	-	2.7.11.1	ko:K04733	ko04010,ko04064,ko04620,ko04621,ko04624,ko04722,ko05133,ko05140,ko05142,ko05145,ko05152,ko05162,ko05164,map04010,map04064,map04620,map04621,map04624,map04722,map05133,map05140,map05142,map05145,map05152,map05162,map05164	M00686	-	-	ko00000,ko00001,ko00002,ko01000,ko01001	-	-	-	LRRNT_2,LRR_8,Pkinase_Tyr
file_1_file_1_jg14036.t1	3694.POPTR_0009s07930.1	2.36e-30	122	2C7M3@1|root,2QWF3@2759|Eukaryota,37NI1@33090|Viridiplantae,3GA9F@35493|Streptophyta,4JS1S@91835|fabids	35493|Streptophyta	K	Belongs to the GRAS family	-	-	-	-	-	-	-	-	-	-	-	-	GRAS
file_1_file_1_jg14037.t1	3641.EOY34567	1.53e-22	102	2C7M3@1|root,2SIRK@2759|Eukaryota,37Y3B@33090|Viridiplantae,3GN8E@35493|Streptophyta	35493|Streptophyta	K	Belongs to the GRAS family	-	-	-	-	-	-	-	-	-	-	-	-	GRAS
file_1_file_1_jg14038.t1	71139.XP_010043405.1	9.04e-160	461	COG4886@1|root,KOG0619@2759|Eukaryota,37JP9@33090|Viridiplantae,3GB1E@35493|Streptophyta	35493|Streptophyta	S	LRR repeats and ubiquitin-like domain-containing protein	-	-	-	ko:K19613	ko04014,map04014	-	-	-	ko00000,ko00001	-	-	-	LRR_4,LRR_8,ubiquitin
file_1_file_2_19615_t	71139.XP_010043403.1	0	2048	COG0476@1|root,KOG2012@2759|Eukaryota,37Q5I@33090|Viridiplantae,3GC9V@35493|Streptophyta	35493|Streptophyta	O	Belongs to the ubiquitin-activating E1 family	UBA1	GO:0003674,GO:0003824,GO:0004842,GO:0005575,GO:0005622,GO:0005623,GO:0005634,GO:0005737,GO:0005829,GO:0005886,GO:0005911,GO:0006464,GO:0006807,GO:0006950,GO:0006974,GO:0008150,GO:0008152,GO:0009506,GO:0009605,GO:0009607,GO:0009987,GO:0010035,GO:0010038,GO:0016020,GO:0016567,GO:0016740,GO:0019538,GO:0019787,GO:0030054,GO:0032446,GO:0033554,GO:0036211,GO:0042221,GO:0043170,GO:0043207,GO:0043226,GO:…	6.2.1.45	ko:K03178	ko04120,ko05012,map04120,map05012	-	-	-	ko00000,ko00001,ko01000,ko04121,ko04147	-	-	-	E1_4HB,E1_FCCH,E1_UFD,ThiF,UBA_e1_thiolCys
file_1_file_1_jg14039.t1	71139.XP_010043403.1	0	2035	COG0476@1|root,KOG2012@2759|Eukaryota,37Q5I@33090|Viridiplantae,3GC9V@35493|Streptophyta	35493|Streptophyta	O	Belongs to the ubiquitin-activating E1 family	UBA1	GO:0003674,GO:0003824,GO:0004842,GO:0005575,GO:0005622,GO:0005623,GO:0005634,GO:0005737,GO:0005829,GO:0005886,GO:0005911,GO:0006464,GO:0006807,GO:0006950,GO:0006974,GO:0008150,GO:0008152,GO:0009506,GO:0009605,GO:0009607,GO:0009987,GO:0010035,GO:0010038,GO:0016020,GO:0016567,GO:0016740,GO:0019538,GO:0019787,GO:0030054,GO:0032446,GO:0033554,GO:0036211,GO:0042221,GO:0043170,GO:0043207,GO:0043226,GO:…	6.2.1.45	ko:K03178	ko04120,ko05012,map04120,map05012	-	-	-	ko00000,ko00001,ko01000,ko04121,ko04147	-	-	-	E1_4HB,E1_FCCH,E1_UFD,ThiF,UBA_e1_thiolCys
file_1_file_1_jg14040.t1	71139.XP_010043399.1	0	1741	KOG2390@1|root,KOG2390@2759|Eukaryota,37NVX@33090|Viridiplantae,3GENF@35493|Streptophyta	35493|Streptophyta	S	Rab3 GTPase-activating protein catalytic	-	-	-	ko:K18270	-	-	-	-	ko00000,ko04131,ko04147	-	-	-	Rab3-GTPase_cat
file_1_file_1_jg14040.t2	71139.XP_010043399.1	0	1736	KOG2390@1|root,KOG2390@2759|Eukaryota,37NVX@33090|Viridiplantae,3GENF@35493|Streptophyta	35493|Streptophyta	S	Rab3 GTPase-activating protein catalytic	-	-	-	ko:K18270	-	-	-	-	ko00000,ko04131,ko04147	-	-	-	Rab3-GTPase_cat
file_1_file_2_19618_t	71139.XP_010043399.1	1.82e-208	602	KOG2390@1|root,KOG2390@2759|Eukaryota,37NVX@33090|Viridiplantae,3GENF@35493|Streptophyta	35493|Streptophyta	S	Rab3 GTPase-activating protein catalytic	-	-	-	ko:K18270	-	-	-	-	ko00000,ko04131,ko04147	-	-	-	Rab3-GTPase_cat
file_1_file_1_jg14041.t1	71139.XP_010043396.1	8.74e-108	318	2CMCU@1|root,2QPZE@2759|Eukaryota,37Q9Y@33090|Viridiplantae,3G95P@35493|Streptophyta	35493|Streptophyta	S	Protein LIGHT-DEPENDENT SHORT HYPOCOTYLS	-	GO:0005575,GO:0005622,GO:0005623,GO:0005634,GO:0006139,GO:0006351,GO:0006725,GO:0006807,GO:0008150,GO:0008152,GO:0009058,GO:0009059,GO:0009299,GO:0009314,GO:0009416,GO:0009628,GO:0009653,GO:0009987,GO:0010467,GO:0016070,GO:0016071,GO:0018130,GO:0019438,GO:0032502,GO:0032774,GO:0034641,GO:0034645,GO:0034654,GO:0043170,GO:0043226,GO:0043227,GO:0043229,GO:0043231,GO:0044237,GO:0044238,GO:0044249,GO:…	-	-	-	-	-	-	-	-	-	-	DUF640
file_1_file_1_jg14042.t1	71139.XP_010043394.1	1.7e-150	431	KOG3160@1|root,KOG3160@2759|Eukaryota,37KZ7@33090|Viridiplantae,3GA7J@35493|Streptophyta	35493|Streptophyta	O	lysosomal thiol	-	-	-	ko:K08059	ko04612,map04612	-	-	-	ko00000,ko00001	-	-	-	GILT
file_1_file_1_jg14043.t1	71139.XP_010043393.1	1.08e-210	585	COG0451@1|root,KOG1502@2759|Eukaryota,37PD3@33090|Viridiplantae,3G9HI@35493|Streptophyta	35493|Streptophyta	V	Cinnamoyl-CoA reductase	-	-	-	-	-	-	-	-	-	-	-	-	Epimerase
file_1_file_2_19621_t	71139.XP_010043393.1	9.91e-217	600	COG0451@1|root,KOG1502@2759|Eukaryota,37PD3@33090|Viridiplantae,3G9HI@35493|Streptophyta	35493|Streptophyta	V	Cinnamoyl-CoA reductase	-	-	-	-	-	-	-	-	-	-	-	-	Epimerase
file_1_file_1_jg14044.t1	225117.XP_009369565.1	9.83e-142	406	COG1471@1|root,KOG0378@2759|Eukaryota,37RB4@33090|Viridiplantae,3GA55@35493|Streptophyta,4JKT7@91835|fabids	35493|Streptophyta	J	Belongs to the eukaryotic ribosomal protein eS4 family	-	-	-	ko:K02987	ko03010,map03010	M00177,M00179	-	-	br01610,ko00000,ko00001,ko00002,ko03011	-	-	-	40S_S4_C,KOW,RS4NT,Ribosomal_S4e,S4
file_1_file_2_19623_t	71139.XP_010043390.1	2.19e-155	457	KOG1995@1|root,KOG1995@2759|Eukaryota,37MIY@33090|Viridiplantae,3G7C7@35493|Streptophyta	35493|Streptophyta	A	Transcription initiation factor TFIID subunit	-	GO:0005575,GO:0005622,GO:0005623,GO:0005634,GO:0005737,GO:0009507,GO:0009536,GO:0043226,GO:0043227,GO:0043229,GO:0043231,GO:0044424,GO:0044444,GO:0044464	-	ko:K13098	ko05202,map05202	-	-	-	ko00000,ko00001,ko03041	-	-	-	RRM_1,zf-RanBP
file_1_file_1_jg14045.t1	71139.XP_010043390.1	3.1e-147	437	KOG1995@1|root,KOG1995@2759|Eukaryota,37MIY@33090|Viridiplantae,3G7C7@35493|Streptophyta	35493|Streptophyta	A	Transcription initiation factor TFIID subunit	-	GO:0005575,GO:0005622,GO:0005623,GO:0005634,GO:0005737,GO:0009507,GO:0009536,GO:0043226,GO:0043227,GO:0043229,GO:0043231,GO:0044424,GO:0044444,GO:0044464	-	ko:K13098	ko05202,map05202	-	-	-	ko00000,ko00001,ko03041	-	-	-	RRM_1,zf-RanBP
file_1_file_1_jg14047.t1	71139.XP_010043388.1	1.18e-139	401	2CU5Q@1|root,2RJEI@2759|Eukaryota,37S2K@33090|Viridiplantae,3GHDX@35493|Streptophyta	35493|Streptophyta	S	Protein FLC EXPRESSOR	-	-	-	-	-	-	-	-	-	-	-	-	-
file_1_file_1_jg14048.t1	71139.XP_010045369.1	4.94e-126	365	2BY5V@1|root,2RXSP@2759|Eukaryota,37U5R@33090|Viridiplantae,3GI1X@35493|Streptophyta	35493|Streptophyta	-	-	-	-	-	-	-	-	-	-	-	-	-	-	-
file_1_file_1_jg14049.t1	71139.XP_010045372.1	3.81e-98	286	2CXI2@1|root,2RXPJ@2759|Eukaryota,37TYR@33090|Viridiplantae,3GFGF@35493|Streptophyta	35493|Streptophyta	S	lob domain-containing protein	-	-	-	-	-	-	-	-	-	-	-	-	LOB
file_1_file_1_jg14050.t1	71139.XP_010045373.1	0	1212	KOG0039@1|root,KOG0039@2759|Eukaryota	2759|Eukaryota	C	oxidoreductase activity, acting on NAD(P)H, oxygen as acceptor	-	-	1.16.1.7	ko:K00521	-	-	-	-	ko00000,ko01000	-	-	-	FAD_binding_8,Ferric_reduct,NAD_binding_6
file_1_file_1_jg14051.t1	71139.XP_010045377.1	5.31e-299	819	KOG1192@1|root,KOG1192@2759|Eukaryota,37M7J@33090|Viridiplantae,3GEXZ@35493|Streptophyta	35493|Streptophyta	CG	UDP-Glycosyltransferase	-	GO:0003674,GO:0003824,GO:0005575,GO:0005622,GO:0005623,GO:0005634,GO:0005737,GO:0005829,GO:0008150,GO:0008194,GO:0009909,GO:0016740,GO:0016757,GO:0016758,GO:0035251,GO:0043226,GO:0043227,GO:0043229,GO:0043231,GO:0044424,GO:0044444,GO:0044464,GO:0046527,GO:0048580,GO:0048831,GO:0050789,GO:0050793,GO:0051239,GO:0065007,GO:0080043,GO:0080044,GO:2000026,GO:2000241	2.4.1.324	ko:K21374	-	-	-	-	ko00000,ko01000,ko01003	-	GT1	-	UDPGT
file_1_file_1_jg14052.t1	71139.XP_010045375.1	7.55e-284	792	KOG1192@1|root,KOG1192@2759|Eukaryota,37M7J@33090|Viridiplantae,3GEXZ@35493|Streptophyta	35493|Streptophyta	CG	UDP-Glycosyltransferase	-	GO:0003674,GO:0003824,GO:0005575,GO:0005622,GO:0005623,GO:0005634,GO:0005737,GO:0005829,GO:0008150,GO:0008194,GO:0009909,GO:0016740,GO:0016757,GO:0016758,GO:0035251,GO:0043226,GO:0043227,GO:0043229,GO:0043231,GO:0044424,GO:0044444,GO:0044464,GO:0046527,GO:0048580,GO:0048831,GO:0050789,GO:0050793,GO:0051239,GO:0065007,GO:0080043,GO:0080044,GO:2000026,GO:2000241	2.4.1.324	ko:K21374	-	-	-	-	ko00000,ko01000,ko01003	-	GT1	-	UDPGT
file_1_file_1_jg14053.t1	71139.XP_010045381.1	6.86e-243	674	COG0639@1|root,KOG0374@2759|Eukaryota,37RTI@33090|Viridiplantae,3G98S@35493|Streptophyta	35493|Streptophyta	T	Calcineurin-like metallo-phosphoesterase superfamily protein	-	GO:0003674,GO:0003824,GO:0005488,GO:0005575,GO:0005622,GO:0005623,GO:0005737,GO:0006793,GO:0006796,GO:0008150,GO:0008152,GO:0009507,GO:0009536,GO:0009987,GO:0016311,GO:0016787,GO:0016788,GO:0016791,GO:0030145,GO:0042578,GO:0043167,GO:0043169,GO:0043226,GO:0043227,GO:0043229,GO:0043231,GO:0044237,GO:0044424,GO:0044444,GO:0044464,GO:0046872,GO:0046914	-	-	-	-	-	-	-	-	-	-	Metallophos
file_1_file_1_jg14055.t1	71139.XP_010046749.1	0	1273	COG0475@1|root,KOG1650@2759|Eukaryota,37PQ6@33090|Viridiplantae,3G8SW@35493|Streptophyta	35493|Streptophyta	P	cation H( ) antiporter	-	GO:0005575,GO:0005623,GO:0006810,GO:0006811,GO:0006812,GO:0006885,GO:0008150,GO:0012505,GO:0015672,GO:0042592,GO:0044464,GO:0048878,GO:0050801,GO:0051179,GO:0051234,GO:0055067,GO:0055080,GO:0065007,GO:0065008,GO:0098771	-	-	-	-	-	-	-	-	-	-	Na_H_Exchanger
file_1_file_1_jg14056.t1	71139.XP_010045385.1	1.54e-60	192	KOG3362@1|root,KOG3362@2759|Eukaryota,37HH9@33090|Viridiplantae,3GE52@35493|Streptophyta	35493|Streptophyta	S	SWR1 complex subunit	-	GO:0000228,GO:0000785,GO:0000790,GO:0000812,GO:0003674,GO:0003682,GO:0005488,GO:0005515,GO:0005575,GO:0005622,GO:0005623,GO:0005634,GO:0005694,GO:0006325,GO:0006338,GO:0006950,GO:0006952,GO:0006996,GO:0008150,GO:0009605,GO:0009607,GO:0009617,GO:0009909,GO:0009987,GO:0016043,GO:0019222,GO:0019899,GO:0031056,GO:0031063,GO:0031323,GO:0031399,GO:0031491,GO:0031974,GO:0031981,GO:0032268,GO:0032991,GO:…	-	ko:K11663	-	-	-	-	ko00000,ko03036	-	-	-	zf-HIT
file_1_file_1_jg14057.t1	71139.XP_010045387.1	0	1687	KOG2053@1|root,KOG2053@2759|Eukaryota,37MJ9@33090|Viridiplantae,3GA7P@35493|Streptophyta	35493|Streptophyta	Z	Phagocyte signaling-impaired protein	-	GO:0000323,GO:0002376,GO:0005575,GO:0005622,GO:0005623,GO:0005737,GO:0005764,GO:0005773,GO:0005829,GO:0005911,GO:0006464,GO:0006473,GO:0006474,GO:0006807,GO:0006810,GO:0006897,GO:0006909,GO:0006911,GO:0006955,GO:0008150,GO:0008152,GO:0009506,GO:0009987,GO:0010324,GO:0010467,GO:0016043,GO:0016192,GO:0017196,GO:0018193,GO:0018206,GO:0019538,GO:0030054,GO:0031248,GO:0031365,GO:0031414,GO:0031416,GO:…	-	ko:K17973	-	-	-	-	ko00000,ko03029	-	-	-	NatB_MDM20
file_1_file_1_jg14058.t1	71139.XP_010045390.1	0	961	COG5391@1|root,KOG2273@2759|Eukaryota,37NRV@33090|Viridiplantae,3GD19@35493|Streptophyta	35493|Streptophyta	U	sorting nexin	-	GO:0000139,GO:0003674,GO:0005488,GO:0005515,GO:0005543,GO:0005575,GO:0005622,GO:0005623,GO:0005737,GO:0005768,GO:0005770,GO:0005771,GO:0005794,GO:0005802,GO:0005829,GO:0006807,GO:0006810,GO:0006897,GO:0006996,GO:0007034,GO:0007275,GO:0008150,GO:0008152,GO:0008289,GO:0009791,GO:0009987,GO:0010008,GO:0010467,GO:0012505,GO:0016020,GO:0016043,GO:0016050,GO:0016192,GO:0019538,GO:0019898,GO:0030904,GO:…	-	ko:K17917	ko04144,map04144	-	-	-	ko00000,ko00001,ko04131	-	-	-	PX,Vps5
file_1_file_1_jg14059.t1	71139.XP_010045391.1	3.29e-229	634	COG3240@1|root,2QSNM@2759|Eukaryota,37S5N@33090|Viridiplantae,3G9TQ@35493|Streptophyta	35493|Streptophyta	I	Belongs to the 'GDSL' lipolytic enzyme family	-	-	-	-	-	-	-	-	-	-	-	-	Lipase_GDSL
file_1_file_2_19639_t	71139.XP_010045391.1	5.1e-180	511	COG3240@1|root,2QSNM@2759|Eukaryota,37S5N@33090|Viridiplantae,3G9TQ@35493|Streptophyta	35493|Streptophyta	I	Belongs to the 'GDSL' lipolytic enzyme family	-	-	-	-	-	-	-	-	-	-	-	-	Lipase_GDSL
file_1_file_1_jg14060.t1	71139.XP_010045393.1	4.85e-89	263	2CY03@1|root,2S11E@2759|Eukaryota,37VEX@33090|Viridiplantae,3GJ3P@35493|Streptophyta	35493|Streptophyta	S	Domain of unknown function (DUF4228)	-	-	-	-	-	-	-	-	-	-	-	-	DUF4228
file_1_file_1_jg14061.t1	71139.XP_010046750.1	0	1372	COG0475@1|root,KOG1650@2759|Eukaryota,37SDD@33090|Viridiplantae,3GEFH@35493|Streptophyta	35493|Streptophyta	P	Cation H( ) antiporter	-	GO:0005575,GO:0005623,GO:0006810,GO:0006811,GO:0006812,GO:0006885,GO:0008150,GO:0012505,GO:0015672,GO:0042592,GO:0044464,GO:0048878,GO:0050801,GO:0051179,GO:0051234,GO:0055067,GO:0055080,GO:0065007,GO:0065008,GO:0098771	-	-	-	-	-	-	-	-	-	-	Na_H_Exchanger
file_1_file_1_jg14063.t1	71139.XP_010045395.1	0	851	28JIG@1|root,2QRXJ@2759|Eukaryota,37R9D@33090|Viridiplantae,3G8T5@35493|Streptophyta	35493|Streptophyta	K	WRKY transcription factor	WRKY25	GO:0001067,GO:0001101,GO:0003674,GO:0003676,GO:0003677,GO:0003700,GO:0005488,GO:0005575,GO:0005622,GO:0005623,GO:0005634,GO:0006355,GO:0006725,GO:0006790,GO:0006807,GO:0006950,GO:0006952,GO:0006970,GO:0008150,GO:0008152,GO:0009058,GO:0009266,GO:0009403,GO:0009404,GO:0009408,GO:0009409,GO:0009414,GO:0009415,GO:0009605,GO:0009607,GO:0009617,GO:0009620,GO:0009628,GO:0009651,GO:0009700,GO:0009889,GO:…	-	ko:K13423,ko:K13424	ko04016,ko04626,map04016,map04626	-	-	-	ko00000,ko00001,ko03000	-	-	-	WRKY
file_1_file_1_jg14064.t1	71139.XP_010045397.1	6.4e-141	400	KOG4206@1|root,KOG4206@2759|Eukaryota,37HTB@33090|Viridiplantae,3G8MG@35493|Streptophyta	35493|Streptophyta	A	U2 small nuclear ribonucleoprotein	-	GO:0000245,GO:0000354,GO:0000375,GO:0000377,GO:0000398,GO:0001650,GO:0003674,GO:0003676,GO:0003723,GO:0005488,GO:0005575,GO:0005622,GO:0005623,GO:0005634,GO:0005654,GO:0005681,GO:0005684,GO:0005685,GO:0005686,GO:0005730,GO:0005737,GO:0006139,GO:0006396,GO:0006397,GO:0006725,GO:0006807,GO:0008150,GO:0008152,GO:0008380,GO:0009987,GO:0010467,GO:0015030,GO:0016043,GO:0016070,GO:0016071,GO:0016604,GO:…	-	ko:K11091,ko:K11094	ko03040,map03040	M00351,M00352	-	-	ko00000,ko00001,ko00002,ko03041	-	-	-	RRM_1
file_1_file_1_jg14065.t1	71139.XP_010045398.1	2.03e-273	754	KOG3928@1|root,KOG3928@2759|Eukaryota,37IPH@33090|Viridiplantae,3GE0J@35493|Streptophyta	35493|Streptophyta	J	28S ribosomal protein	-	-	-	ko:K17408	-	-	-	-	br01610,ko00000,ko03011,ko03029	-	-	-	DAP3
file_1_file_1_jg14066.t1	71139.XP_010045404.1	0	1640	28JSH@1|root,2QS6A@2759|Eukaryota,37SJG@33090|Viridiplantae,3G9B0@35493|Streptophyta	35493|Streptophyta	S	Protein TIC110, chloroplastic-like	-	GO:0005575,GO:0005622,GO:0005623,GO:0005737,GO:0006605,GO:0006810,GO:0006886,GO:0006996,GO:0008104,GO:0008150,GO:0009507,GO:0009526,GO:0009528,GO:0009536,GO:0009657,GO:0009658,GO:0009706,GO:0009941,GO:0009987,GO:0015031,GO:0015833,GO:0016020,GO:0016043,GO:0017038,GO:0019866,GO:0031090,GO:0031897,GO:0031967,GO:0031969,GO:0031975,GO:0032991,GO:0033036,GO:0033365,GO:0034613,GO:0042170,GO:0042886,GO:…	-	-	-	-	-	-	-	-	-	-	Tic110
file_1_file_1_jg14067.t1	71139.XP_010045400.1	1.63e-82	246	KOG3390@1|root,KOG3390@2759|Eukaryota,37VF1@33090|Viridiplantae,3GJMH@35493|Streptophyta	35493|Streptophyta	K	biogenesis of lysosome-related organelles complex 1 subunit	-	GO:0005575,GO:0005622,GO:0005623,GO:0005737,GO:0005739,GO:0005768,GO:0005829,GO:0006810,GO:0007034,GO:0007275,GO:0008150,GO:0012505,GO:0016192,GO:0016197,GO:0022622,GO:0031082,GO:0031083,GO:0031410,GO:0031982,GO:0032501,GO:0032502,GO:0032991,GO:0043226,GO:0043227,GO:0043229,GO:0043231,GO:0044424,GO:0044444,GO:0044445,GO:0044464,GO:0045324,GO:0046907,GO:0048364,GO:0048731,GO:0048856,GO:0051179,GO:…	-	ko:K20185	-	-	-	-	ko00000,ko04131	-	-	-	GCN5L1
file_1_file_2_19648_t	71139.XP_010045400.1	3.46e-82	246	KOG3390@1|root,KOG3390@2759|Eukaryota,37VF1@33090|Viridiplantae,3GJMH@35493|Streptophyta	35493|Streptophyta	K	biogenesis of lysosome-related organelles complex 1 subunit	-	GO:0005575,GO:0005622,GO:0005623,GO:0005737,GO:0005739,GO:0005768,GO:0005829,GO:0006810,GO:0007034,GO:0007275,GO:0008150,GO:0012505,GO:0016192,GO:0016197,GO:0022622,GO:0031082,GO:0031083,GO:0031410,GO:0031982,GO:0032501,GO:0032502,GO:0032991,GO:0043226,GO:0043227,GO:0043229,GO:0043231,GO:0044424,GO:0044444,GO:0044445,GO:0044464,GO:0045324,GO:0046907,GO:0048364,GO:0048731,GO:0048856,GO:0051179,GO:…	-	ko:K20185	-	-	-	-	ko00000,ko04131	-	-	-	GCN5L1
file_1_file_1_jg14068.t1	71139.XP_010045399.1	4.21e-202	563	2C0PQ@1|root,2QT8W@2759|Eukaryota,37HUF@33090|Viridiplantae,3GE7A@35493|Streptophyta	35493|Streptophyta	Q	Belongs to the peroxidase family. Classical plant (class III) peroxidase subfamily	-	-	1.11.1.7	ko:K00430	ko00940,ko01100,ko01110,map00940,map01100,map01110	-	R00602,R02596,R03919,R04007,R07443	RC00034	ko00000,ko00001,ko01000	-	-	-	peroxidase
file_1_file_2_19650_t	71139.XP_010045408.1	1.58e-97	293	28N5C@1|root,2QUQH@2759|Eukaryota,37J5W@33090|Viridiplantae,3GF46@35493|Streptophyta	35493|Streptophyta	S	lob domain-containing protein	-	-	-	-	-	-	-	-	-	-	-	-	LOB
file_1_file_1_jg14069.t1	71139.XP_010045408.1	5.88e-98	294	28N5C@1|root,2QUQH@2759|Eukaryota,37J5W@33090|Viridiplantae,3GF46@35493|Streptophyta	35493|Streptophyta	S	lob domain-containing protein	-	-	-	-	-	-	-	-	-	-	-	-	LOB
file_1_file_1_jg14070.t1	4096.XP_009759688.1	2.13e-10	65.1	2BJNT@1|root,2S1GQ@2759|Eukaryota,37V74@33090|Viridiplantae,3GJSA@35493|Streptophyta,44MGN@71274|asterids	35493|Streptophyta	-	-	-	-	-	-	-	-	-	-	-	-	-	-	-
file_1_file_1_jg14071.t1	71139.XP_010045409.1	2.25e-250	696	KOG0583@1|root,KOG0583@2759|Eukaryota,37P9S@33090|Viridiplantae,3GBZB@35493|Streptophyta	35493|Streptophyta	T	Non-specific serine threonine protein kinase	-	GO:0003674,GO:0003824,GO:0004672,GO:0004674,GO:0005575,GO:0005622,GO:0005623,GO:0006464,GO:0006468,GO:0006793,GO:0006796,GO:0006807,GO:0007154,GO:0007165,GO:0008150,GO:0008152,GO:0009268,GO:0009628,GO:0009987,GO:0016301,GO:0016310,GO:0016740,GO:0016772,GO:0016773,GO:0018105,GO:0018107,GO:0018193,GO:0018209,GO:0018210,GO:0019538,GO:0023052,GO:0035556,GO:0036211,GO:0043170,GO:0043412,GO:0044237,GO:…	2.7.11.1,2.7.11.11	ko:K07198,ko:K12761	ko04068,ko04113,ko04138,ko04140,ko04150,ko04151,ko04152,ko04211,ko04213,ko04371,ko04530,ko04710,ko04714,ko04910,ko04920,ko04921,ko04922,ko04931,ko04932,ko05410,ko05418,map04068,map04113,map04138,map04140,map04150,map04151,map04152,map04211,map04213,map04371,map04530,map04710,map04714,map04910,map04920,map04921,map04922,map04931,map04932,map05410,map05418	-	-	-	ko00000,ko00001,ko01000,ko01001,ko03029,ko04131	-	-	-	NAF,Pkinase
file_1_file_1_jg14072.t1	71139.XP_010045410.1	1.93e-73	223	2CHJ1@1|root,2S3PD@2759|Eukaryota,37W8C@33090|Viridiplantae,3GKA8@35493|Streptophyta	35493|Streptophyta	S	EPIDERMAL PATTERNING FACTOR-like protein	-	GO:0007275,GO:0008150,GO:0009653,GO:0009791,GO:0009888,GO:0009987,GO:0010016,GO:0010052,GO:0010103,GO:0010374,GO:0030154,GO:0032501,GO:0032502,GO:0048367,GO:0048731,GO:0048856,GO:0048869,GO:0090558,GO:0090626,GO:0090627,GO:0090698	-	-	-	-	-	-	-	-	-	-	EPF
file_1_file_1_jg14073.t1	71139.XP_010046752.1	4.1e-105	316	29KH0@1|root,2RTS2@2759|Eukaryota,37JBV@33090|Viridiplantae,3GIFM@35493|Streptophyta	35493|Streptophyta	S	transcription repressor	-	GO:0006355,GO:0008150,GO:0009889,GO:0009890,GO:0009892,GO:0010468,GO:0010556,GO:0010558,GO:0010605,GO:0010629,GO:0019219,GO:0019222,GO:0031323,GO:0031324,GO:0031326,GO:0031327,GO:0044087,GO:0045892,GO:0045934,GO:0048519,GO:0048523,GO:0050789,GO:0050794,GO:0051171,GO:0051172,GO:0051252,GO:0051253,GO:0060255,GO:0065007,GO:0080090,GO:1902679,GO:1903338,GO:1903506,GO:1903507,GO:2000112,GO:2000113,GO:…	-	-	-	-	-	-	-	-	-	-	DNA_binding_2,Ovate
file_1_file_1_jg14074.t1	71139.XP_010045418.1	0	1816	COG1025@1|root,KOG0959@2759|Eukaryota,37JVY@33090|Viridiplantae,3G7UM@35493|Streptophyta	35493|Streptophyta	O	Belongs to the peptidase M16 family	-	GO:0005575,GO:0005622,GO:0005623,GO:0005737,GO:0005829,GO:0044424,GO:0044444,GO:0044464	3.4.24.61	ko:K01411	-	-	-	-	ko00000,ko01000,ko01002	-	-	-	Peptidase_M16,Peptidase_M16_C,Peptidase_M16_M
file_1_file_2_19659_t	71139.XP_010045418.1	1.16e-74	249	COG1025@1|root,KOG0959@2759|Eukaryota,37JVY@33090|Viridiplantae,3G7UM@35493|Streptophyta	35493|Streptophyta	O	Belongs to the peptidase M16 family	-	GO:0005575,GO:0005622,GO:0005623,GO:0005737,GO:0005829,GO:0044424,GO:0044444,GO:0044464	3.4.24.61	ko:K01411	-	-	-	-	ko00000,ko01000,ko01002	-	-	-	Peptidase_M16,Peptidase_M16_C,Peptidase_M16_M
file_1_file_1_jg14075.t1	3641.EOY34703	2.14e-102	310	28PWT@1|root,2QWJE@2759|Eukaryota,387ZQ@33090|Viridiplantae,3GBYP@35493|Streptophyta	35493|Streptophyta	-	-	-	-	-	-	-	-	-	-	-	-	-	-	-
file_1_file_1_jg14076.t1	71139.XP_010045426.1	0	1454	28PPT@1|root,2QWC1@2759|Eukaryota,37ITH@33090|Viridiplantae,3GXD9@35493|Streptophyta	35493|Streptophyta	K	B3 domain-containing	-	-	-	-	-	-	-	-	-	-	-	-	B3,zf-CW
file_1_file_1_jg14077.t2	225117.XP_009374452.1	1.51e-31	137	292DP@1|root,2R9A3@2759|Eukaryota,37RYN@33090|Viridiplantae,3GHUP@35493|Streptophyta,4JQM0@91835|fabids	35493|Streptophyta	S	isoform X1	-	-	-	-	-	-	-	-	-	-	-	-	-
file_1_file_1_jg14077.t3	225117.XP_009374452.1	1.78e-35	150	292DP@1|root,2R9A3@2759|Eukaryota,37RYN@33090|Viridiplantae,3GHUP@35493|Streptophyta,4JQM0@91835|fabids	35493|Streptophyta	S	isoform X1	-	-	-	-	-	-	-	-	-	-	-	-	-
file_1_file_1_jg14077.t1	225117.XP_009374452.1	1.83e-17	88.6	292DP@1|root,2R9A3@2759|Eukaryota,37RYN@33090|Viridiplantae,3GHUP@35493|Streptophyta,4JQM0@91835|fabids	35493|Streptophyta	S	isoform X1	-	-	-	-	-	-	-	-	-	-	-	-	-
file_1_file_2_19664_t	71139.XP_010045430.1	9.23e-272	746	COG1222@1|root,KOG0727@2759|Eukaryota,37IYU@33090|Viridiplantae,3GBT3@35493|Streptophyta	35493|Streptophyta	O	Belongs to the AAA ATPase family	-	GO:0000502,GO:0003674,GO:0003824,GO:0005488,GO:0005515,GO:0005575,GO:0005618,GO:0005622,GO:0005623,GO:0005634,GO:0005737,GO:0005829,GO:0005911,GO:0006355,GO:0006357,GO:0006508,GO:0006511,GO:0006807,GO:0006950,GO:0008134,GO:0008150,GO:0008152,GO:0009056,GO:0009057,GO:0009506,GO:0009889,GO:0009891,GO:0009893,GO:0009894,GO:0009896,GO:0009987,GO:0010033,GO:0010243,GO:0010468,GO:0010498,GO:0010556,GO:…	-	ko:K03063	ko03050,ko05169,map03050,map05169	M00341	-	-	ko00000,ko00001,ko00002,ko03051	-	-	-	AAA
file_1_file_1_jg14078.t1	71139.XP_010045431.1	2.41e-284	817	2C248@1|root,2QQTB@2759|Eukaryota,37IRJ@33090|Viridiplantae,3GGHG@35493|Streptophyta	35493|Streptophyta	S	actin binding	-	GO:0005575,GO:0005622,GO:0005623,GO:0005737,GO:0005773,GO:0005774,GO:0016020,GO:0031090,GO:0043226,GO:0043227,GO:0043229,GO:0043231,GO:0044422,GO:0044424,GO:0044437,GO:0044444,GO:0044446,GO:0044464,GO:0098588,GO:0098805	-	ko:K10352	ko04530,map04530	-	-	-	ko00000,ko00001,ko04147,ko04812	-	-	-	KIP1
file_1_file_1_jg14079.t1	71139.XP_010045434.1	1.15e-166	479	2CM9M@1|root,2QPQ1@2759|Eukaryota,37N17@33090|Viridiplantae,3G7WP@35493|Streptophyta	35493|Streptophyta	-	-	-	-	-	-	-	-	-	-	-	-	-	-	-
file_1_file_1_jg14080.t1	71139.XP_010045435.1	0	1246	COG5265@1|root,KOG0057@2759|Eukaryota,37JTA@33090|Viridiplantae,3GDDY@35493|Streptophyta	35493|Streptophyta	U	ABC transporter B family member 25	-	GO:0003674,GO:0005215,GO:0005575,GO:0005622,GO:0005623,GO:0005737,GO:0005739,GO:0005740,GO:0005743,GO:0006732,GO:0006777,GO:0006793,GO:0006796,GO:0006807,GO:0006873,GO:0006875,GO:0006879,GO:0006996,GO:0007275,GO:0008150,GO:0008152,GO:0009058,GO:0009108,GO:0009507,GO:0009526,GO:0009536,GO:0009555,GO:0009657,GO:0009658,GO:0009889,GO:0009941,GO:0009987,GO:0010035,GO:0010038,GO:0010288,GO:0010380,GO:…	-	ko:K05663	ko02010,map02010	-	-	-	ko00000,ko00001,ko02000	3.A.1.210	-	-	ABC_membrane,ABC_tran
file_1_file_1_jg12578.t1	71139.XP_010024330.1	5.2e-143	448	28I92@1|root,2QQJE@2759|Eukaryota,37M5G@33090|Viridiplantae,3GG0S@35493|Streptophyta	35493|Streptophyta	S	TMV resistance protein N-like	-	-	-	-	-	-	-	-	-	-	-	-	LRR_5,NB-ARC,TIR
file_1_file_1_jg12579.t1	71139.XP_010041276.1	1.41e-45	176	28I92@1|root,2QQJE@2759|Eukaryota,37M5G@33090|Viridiplantae,3GG0S@35493|Streptophyta	35493|Streptophyta	S	TMV resistance protein N-like	-	-	-	-	-	-	-	-	-	-	-	-	LRR_5,NB-ARC,TIR
file_1_file_1_jg12580.t1	71139.XP_010024330.1	1.23e-51	192	28I92@1|root,2QQJE@2759|Eukaryota,37M5G@33090|Viridiplantae,3GG0S@35493|Streptophyta	35493|Streptophyta	S	TMV resistance protein N-like	-	-	-	-	-	-	-	-	-	-	-	-	LRR_5,NB-ARC,TIR
file_1_file_2_15025_t	71139.XP_010058787.1	1.64e-41	152	28XIB@1|root,2R4BG@2759|Eukaryota,37T5Z@33090|Viridiplantae	33090|Viridiplantae	S	TMV resistance protein N-like	-	-	-	-	-	-	-	-	-	-	-	-	NB-ARC,TIR
file_1_file_1_jg12581.t1	71139.XP_010058787.1	7.55e-40	152	28XIB@1|root,2R4BG@2759|Eukaryota,37T5Z@33090|Viridiplantae	33090|Viridiplantae	S	TMV resistance protein N-like	-	-	-	-	-	-	-	-	-	-	-	-	NB-ARC,TIR
file_1_file_1_jg12582.t1	71139.XP_010024311.1	7.22e-171	481	COG0496@1|root,2QUQI@2759|Eukaryota,37N2B@33090|Viridiplantae,3G8AV@35493|Streptophyta	35493|Streptophyta	S	Survival protein SurE-like phosphatase nucleotidase	-	-	3.1.3.5	ko:K03787	ko00230,ko00240,ko00760,ko01100,ko01110,map00230,map00240,map00760,map01100,map01110	-	R00183,R00511,R00963,R01126,R01227,R01569,R01664,R01968,R02088,R02102,R02323,R02719,R03346	RC00017	ko00000,ko00001,ko01000	-	-	-	SurE
file_1_file_1_jg12583.t1	71139.XP_010024308.1	0	1304	KOG0584@1|root,KOG0584@2759|Eukaryota,37J6K@33090|Viridiplantae,3G9KP@35493|Streptophyta	35493|Streptophyta	T	serine threonine-protein kinase	-	GO:0000003,GO:0003006,GO:0003674,GO:0003824,GO:0004672,GO:0004674,GO:0005575,GO:0005622,GO:0005623,GO:0005737,GO:0005829,GO:0006464,GO:0006468,GO:0006793,GO:0006796,GO:0006807,GO:0007154,GO:0007165,GO:0007275,GO:0007623,GO:0008150,GO:0008152,GO:0009314,GO:0009416,GO:0009628,GO:0009648,GO:0009791,GO:0009987,GO:0010228,GO:0016020,GO:0016301,GO:0016310,GO:0016740,GO:0016772,GO:0016773,GO:0019538,GO:…	2.7.11.1	ko:K08867	-	-	-	-	ko00000,ko01000,ko01001,ko01009	-	-	-	OSR1_C,Pkinase
file_1_file_1_jg12584.t1	71139.XP_010024306.1	3.64e-170	478	COG0131@1|root,KOG3143@2759|Eukaryota,37IAI@33090|Viridiplantae,3GGXA@35493|Streptophyta	35493|Streptophyta	E	Belongs to the imidazoleglycerol-phosphate dehydratase family	-	GO:0000105,GO:0003674,GO:0003824,GO:0004424,GO:0006082,GO:0006520,GO:0006547,GO:0006725,GO:0006807,GO:0008150,GO:0008152,GO:0008652,GO:0009058,GO:0009987,GO:0016053,GO:0016829,GO:0016835,GO:0016836,GO:0018130,GO:0019438,GO:0019752,GO:0034641,GO:0043436,GO:0044237,GO:0044238,GO:0044249,GO:0044281,GO:0044283,GO:0046394,GO:0046483,GO:0052803,GO:0071704,GO:1901360,GO:1901362,GO:1901564,GO:1901566,GO:…	4.2.1.19	ko:K01693	ko00340,ko01100,ko01110,ko01230,map00340,map01100,map01110,map01230	M00026	R03457	RC00932	ko00000,ko00001,ko00002,ko01000	-	-	-	IGPD
file_1_file_1_jg12585.t1	71139.XP_010026955.1	5.55e-283	785	28PVX@1|root,2QWIJ@2759|Eukaryota,37PKT@33090|Viridiplantae,3GFAH@35493|Streptophyta	35493|Streptophyta	S	XS domain	-	-	-	-	-	-	-	-	-	-	-	-	XS
file_1_file_1_jg12586.t1	71139.XP_010024304.1	0	927	28P75@1|root,2QVU4@2759|Eukaryota,37N5F@33090|Viridiplantae,3G7FH@35493|Streptophyta	35493|Streptophyta	J	Belongs to the Frigida family	-	-	-	-	-	-	-	-	-	-	-	-	Frigida
file_1_file_1_jg12587.t1	71139.XP_010024303.1	3.85e-192	540	28JKP@1|root,2QRZY@2759|Eukaryota,37RYW@33090|Viridiplantae,3GF42@35493|Streptophyta	35493|Streptophyta	J	Ribosomal L18 of archaea, bacteria, mitoch. and chloroplast	-	-	-	ko:K02881	ko03010,map03010	M00178,M00179	-	-	br01610,ko00000,ko00001,ko00002,ko03011	-	-	-	Ribosomal_L18p
file_1_file_1_jg12588.t1	71139.XP_010024302.1	6.95e-71	217	COG0633@1|root,2RZRG@2759|Eukaryota,37VRI@33090|Viridiplantae,3GITD@35493|Streptophyta	35493|Streptophyta	C	Ferredoxins are iron-sulfur proteins that transfer electrons in a wide variety of metabolic reactions	-	GO:0003674,GO:0003824,GO:0005488,GO:0005575,GO:0005622,GO:0005623,GO:0005737,GO:0006091,GO:0008150,GO:0008152,GO:0009055,GO:0009314,GO:0009416,GO:0009507,GO:0009536,GO:0009628,GO:0009642,GO:0009644,GO:0009987,GO:0016491,GO:0022900,GO:0043226,GO:0043227,GO:0043229,GO:0043231,GO:0044237,GO:0044424,GO:0044444,GO:0044464,GO:0048037,GO:0050896,GO:0051536,GO:0051537,GO:0051540,GO:0055114	-	ko:K02639	ko00195,map00195	-	-	-	ko00000,ko00001,ko00194	-	-	-	Fer2
file_1_file_1_jg12589.t1	71139.XP_010024290.1	7.26e-148	439	COG0666@1|root,KOG0504@2759|Eukaryota,37IQD@33090|Viridiplantae,3G8FY@35493|Streptophyta	35493|Streptophyta	L	ankyrin repeat-containing protein	-	-	-	ko:K15502,ko:K15503,ko:K19626	ko04310,map04310	-	-	-	ko00000,ko00001,ko01009,ko03400	-	-	-	Ank,Ank_2,Ank_4,PGG
file_1_file_1_jg12590.t1	71139.XP_010024285.1	1.35e-215	597	COG0031@1|root,KOG1252@2759|Eukaryota,37MTM@33090|Viridiplantae,3G849@35493|Streptophyta	35493|Streptophyta	E	Belongs to the cysteine synthase cystathionine beta- synthase family	OASA1	GO:0000003,GO:0000096,GO:0000097,GO:0000902,GO:0000904,GO:0003006,GO:0003674,GO:0003824,GO:0004124,GO:0005488,GO:0005575,GO:0005576,GO:0005622,GO:0005623,GO:0005634,GO:0005737,GO:0005773,GO:0005774,GO:0005777,GO:0005829,GO:0005886,GO:0006082,GO:0006520,GO:0006534,GO:0006535,GO:0006563,GO:0006790,GO:0006807,GO:0007568,GO:0008144,GO:0008150,GO:0008152,GO:0008652,GO:0009058,GO:0009069,GO:0009070,GO:…	2.5.1.47	ko:K01738	ko00270,ko00920,ko01100,ko01110,ko01120,ko01130,ko01200,ko01230,map00270,map00920,map01100,map01110,map01120,map01130,map01200,map01230	M00021	R00897,R03601,R04859	RC00020,RC02814,RC02821	ko00000,ko00001,ko00002,ko01000	-	-	-	PALP
file_1_file_1_jg12591.t1	71139.XP_010024282.1	3.74e-85	256	KOG4098@1|root,KOG4098@2759|Eukaryota,37U7S@33090|Viridiplantae,3GI51@35493|Streptophyta	35493|Streptophyta	O	prefoldin subunit 2	-	GO:0003674,GO:0005488,GO:0005515,GO:0005575,GO:0005622,GO:0005623,GO:0005737,GO:0006457,GO:0008150,GO:0009987,GO:0044183,GO:0044424,GO:0044464	-	ko:K09549	-	-	-	-	ko00000,ko03110	-	-	-	Prefoldin_2
file_1_file_1_jg12592.t1	71139.XP_010024281.1	1.45e-92	279	2CXX0@1|root,2S0CD@2759|Eukaryota,37V13@33090|Viridiplantae,3GIUE@35493|Streptophyta	35493|Streptophyta	S	transcription repressor	-	GO:0006355,GO:0008150,GO:0009889,GO:0009890,GO:0009892,GO:0010468,GO:0010556,GO:0010558,GO:0010605,GO:0010629,GO:0019219,GO:0019222,GO:0031323,GO:0031324,GO:0031326,GO:0031327,GO:0045892,GO:0045934,GO:0048519,GO:0048523,GO:0050789,GO:0050794,GO:0051171,GO:0051172,GO:0051252,GO:0051253,GO:0060255,GO:0065007,GO:0080090,GO:1902679,GO:1903506,GO:1903507,GO:2000112,GO:2000113,GO:2001141	-	-	-	-	-	-	-	-	-	-	Ovate
file_1_file_1_jg12593.t1	71139.XP_010024280.1	7.31e-108	320	2CMAE@1|root,2QPSX@2759|Eukaryota,37K48@33090|Viridiplantae,3GAIC@35493|Streptophyta	35493|Streptophyta	S	late embryogenesis abundant protein	-	-	-	-	-	-	-	-	-	-	-	-	SMP
file_1_file_1_jg12594.t1	71139.XP_010024272.1	0	1242	KOG4197@1|root,KOG4197@2759|Eukaryota,37PYE@33090|Viridiplantae,3G935@35493|Streptophyta	35493|Streptophyta	S	Pentatricopeptide repeat-containing protein	-	GO:0003674,GO:0003676,GO:0003723,GO:0003727,GO:0003824,GO:0004518,GO:0004519,GO:0005488,GO:0005575,GO:0005622,GO:0005623,GO:0005737,GO:0005739,GO:0006081,GO:0006082,GO:0006084,GO:0006090,GO:0006139,GO:0006163,GO:0006629,GO:0006637,GO:0006644,GO:0006720,GO:0006725,GO:0006732,GO:0006753,GO:0006790,GO:0006793,GO:0006796,GO:0006807,GO:0007275,GO:0008150,GO:0008152,GO:0008202,GO:0008299,GO:0008610,GO:…	-	-	-	-	-	-	-	-	-	-	DYW_deaminase,PPR,PPR_2
file_1_file_2_15041_t	71139.XP_010024272.1	0	1246	KOG4197@1|root,KOG4197@2759|Eukaryota,37PYE@33090|Viridiplantae,3G935@35493|Streptophyta	35493|Streptophyta	S	Pentatricopeptide repeat-containing protein	-	GO:0003674,GO:0003676,GO:0003723,GO:0003727,GO:0003824,GO:0004518,GO:0004519,GO:0005488,GO:0005575,GO:0005622,GO:0005623,GO:0005737,GO:0005739,GO:0006081,GO:0006082,GO:0006084,GO:0006090,GO:0006139,GO:0006163,GO:0006629,GO:0006637,GO:0006644,GO:0006720,GO:0006725,GO:0006732,GO:0006753,GO:0006790,GO:0006793,GO:0006796,GO:0006807,GO:0007275,GO:0008150,GO:0008152,GO:0008202,GO:0008299,GO:0008610,GO:…	-	-	-	-	-	-	-	-	-	-	DYW_deaminase,PPR,PPR_2
file_1_file_1_jg12595.t1	71139.XP_010026947.1	3.41e-51	169	KOG4032@1|root,KOG4032@2759|Eukaryota,37W83@33090|Viridiplantae,3GKDM@35493|Streptophyta	35493|Streptophyta	S	pre-rRNA-processing protein TSR2	-	-	-	ko:K14800	-	-	-	-	ko00000,ko03009	-	-	-	WGG
file_1_file_1_jg12596.t1	71139.XP_010026946.1	1.39e-72	233	2CRV5@1|root,2R99G@2759|Eukaryota,37NE9@33090|Viridiplantae,3GASC@35493|Streptophyta	35493|Streptophyta	-	-	-	-	-	-	-	-	-	-	-	-	-	-	-
file_1_file_1_jg12598.t1	71139.XP_010026946.1	5.63e-174	502	2CRV5@1|root,2R99G@2759|Eukaryota,37NE9@33090|Viridiplantae,3GASC@35493|Streptophyta	35493|Streptophyta	-	-	-	-	-	-	-	-	-	-	-	-	-	-	-
file_1_file_1_jg12599.t1	71139.XP_010024267.1	2.17e-243	697	28NCW@1|root,2QUYB@2759|Eukaryota,37SRF@33090|Viridiplantae,3GDCY@35493|Streptophyta	35493|Streptophyta	S	CDPK adapter protein	-	-	-	-	-	-	-	-	-	-	-	-	Myb_DNA-bind_3,PHD_Oberon
file_1_file_1_jg12599.t2	71139.XP_010024267.1	1.2e-242	695	28NCW@1|root,2QUYB@2759|Eukaryota,37SRF@33090|Viridiplantae,3GDCY@35493|Streptophyta	35493|Streptophyta	S	CDPK adapter protein	-	-	-	-	-	-	-	-	-	-	-	-	Myb_DNA-bind_3,PHD_Oberon
file_1_file_1_jg12600.t1	71139.XP_010024266.1	6.49e-77	238	2C1DC@1|root,2S2PF@2759|Eukaryota,37V98@33090|Viridiplantae,3GI97@35493|Streptophyta	35493|Streptophyta	S	heat shock protein	-	-	-	-	-	-	-	-	-	-	-	-	-
file_1_file_1_jg12601.t1	71139.XP_010024263.1	5.89e-131	380	2A4ES@1|root,2RY7D@2759|Eukaryota,37TRS@33090|Viridiplantae,3GIAQ@35493|Streptophyta	35493|Streptophyta	-	-	-	-	-	-	-	-	-	-	-	-	-	-	-
file_1_file_2_15052_t	71139.XP_010024261.1	2.75e-178	500	2AMXX@1|root,2QS8T@2759|Eukaryota,37MN7@33090|Viridiplantae,3GGH3@35493|Streptophyta	35493|Streptophyta	S	zinc-finger of the FCS-type, C2-C2	-	-	-	-	-	-	-	-	-	-	-	-	zf-FLZ
file_1_file_1_jg12602.t1	71139.XP_010024261.1	1.45e-177	501	2AMXX@1|root,2QS8T@2759|Eukaryota,37MN7@33090|Viridiplantae,3GGH3@35493|Streptophyta	35493|Streptophyta	S	zinc-finger of the FCS-type, C2-C2	-	-	-	-	-	-	-	-	-	-	-	-	zf-FLZ
file_1_file_1_jg12603.t1	71139.XP_010024260.1	1.38e-108	314	COG1670@1|root,2RRQY@2759|Eukaryota,37U08@33090|Viridiplantae,3GI6J@35493|Streptophyta	35493|Streptophyta	J	N-acetyltransferase	-	-	-	-	-	-	-	-	-	-	-	-	Acetyltransf_3
file_1_file_1_jg12604.t1	71139.XP_010024259.1	2.02e-103	302	COG1670@1|root,2RXXF@2759|Eukaryota,37TVE@33090|Viridiplantae,3GI8H@35493|Streptophyta	35493|Streptophyta	J	N-acetyltransferase	-	-	-	-	-	-	-	-	-	-	-	-	Acetyltransf_3
file_1_file_1_jg12605.t1	71139.XP_010031002.1	2.21e-13	71.6	KOG1267@1|root,KOG1267@2759|Eukaryota,37IHN@33090|Viridiplantae,3GGTS@35493|Streptophyta	35493|Streptophyta	K	mTERF	-	GO:0000394,GO:0003674,GO:0003676,GO:0003723,GO:0003727,GO:0005488,GO:0005575,GO:0005622,GO:0005623,GO:0005737,GO:0005739,GO:0006139,GO:0006396,GO:0006725,GO:0006807,GO:0006996,GO:0008150,GO:0008152,GO:0008380,GO:0009507,GO:0009536,GO:0009657,GO:0009658,GO:0009987,GO:0010467,GO:0016043,GO:0016070,GO:0019843,GO:0022607,GO:0022613,GO:0022618,GO:0032502,GO:0034622,GO:0034641,GO:0042254,GO:0042255,GO:…	-	-	-	-	-	-	-	-	-	-	mTERF
file_1_file_1_jg12606.t1	71139.XP_010026944.1	4.41e-106	309	COG1670@1|root,2RXXF@2759|Eukaryota,37TVE@33090|Viridiplantae,3GI8H@35493|Streptophyta	35493|Streptophyta	J	N-acetyltransferase	-	-	-	-	-	-	-	-	-	-	-	-	Acetyltransf_3
file_1_file_1_jg12607.t1	71139.XP_010024256.1	9.96e-90	273	COG1670@1|root,2RXXF@2759|Eukaryota,37TVE@33090|Viridiplantae,3GI8H@35493|Streptophyta	35493|Streptophyta	J	N-acetyltransferase	-	-	-	-	-	-	-	-	-	-	-	-	Acetyltransf_3
file_1_file_1_jg12608.t1	71139.XP_010029575.1	2.66e-06	52.4	KOG1052@1|root,KOG1052@2759|Eukaryota,37J5Z@33090|Viridiplantae,3G89R@35493|Streptophyta	35493|Streptophyta	EPT	Glutamate-gated receptor that probably acts as non- selective cation channel	-	GO:0001101,GO:0002218,GO:0002252,GO:0002253,GO:0002376,GO:0002682,GO:0002684,GO:0003674,GO:0004888,GO:0005215,GO:0005216,GO:0005261,GO:0005262,GO:0005575,GO:0005623,GO:0005886,GO:0006810,GO:0006811,GO:0006812,GO:0006816,GO:0006950,GO:0006952,GO:0006955,GO:0007154,GO:0007165,GO:0007267,GO:0008066,GO:0008150,GO:0008324,GO:0009605,GO:0009607,GO:0009611,GO:0009617,GO:0009682,GO:0009719,GO:0009725,GO:…	-	ko:K05387	-	-	-	-	ko00000,ko04040	1.A.10.1.10,1.A.10.1.18,1.A.10.1.7	-	-	ANF_receptor,Lig_chan,SBP_bac_3
file_1_file_2_15059_t	71139.XP_010024249.1	5.74e-241	668	COG5157@1|root,KOG3786@2759|Eukaryota,37N18@33090|Viridiplantae,3G8WI@35493|Streptophyta	35493|Streptophyta	K	cdc73,php	PHP	GO:0000003,GO:0000428,GO:0000988,GO:0000989,GO:0000993,GO:0001076,GO:0001098,GO:0001099,GO:0003006,GO:0003674,GO:0005488,GO:0005515,GO:0005575,GO:0005622,GO:0005623,GO:0005634,GO:0005654,GO:0006139,GO:0006325,GO:0006355,GO:0006357,GO:0006396,GO:0006397,GO:0006464,GO:0006479,GO:0006725,GO:0006807,GO:0006996,GO:0007275,GO:0008023,GO:0008150,GO:0008152,GO:0008213,GO:0009791,GO:0009889,GO:0009891,GO:…	-	ko:K15175	-	-	-	-	ko00000,ko03021	-	-	-	CDC73_C,CDC73_N
file_1_file_1_jg12609.t1	71139.XP_010024249.1	1.1e-229	639	COG5157@1|root,KOG3786@2759|Eukaryota,37N18@33090|Viridiplantae,3G8WI@35493|Streptophyta	35493|Streptophyta	K	cdc73,php	PHP	GO:0000003,GO:0000428,GO:0000988,GO:0000989,GO:0000993,GO:0001076,GO:0001098,GO:0001099,GO:0003006,GO:0003674,GO:0005488,GO:0005515,GO:0005575,GO:0005622,GO:0005623,GO:0005634,GO:0005654,GO:0006139,GO:0006325,GO:0006355,GO:0006357,GO:0006396,GO:0006397,GO:0006464,GO:0006479,GO:0006725,GO:0006807,GO:0006996,GO:0007275,GO:0008023,GO:0008150,GO:0008152,GO:0008213,GO:0009791,GO:0009889,GO:0009891,GO:…	-	ko:K15175	-	-	-	-	ko00000,ko03021	-	-	-	CDC73_C,CDC73_N
file_1_file_1_jg12610.t1	71139.XP_010024255.1	1.65e-91	270	2AR61@1|root,2RZKK@2759|Eukaryota,37UR9@33090|Viridiplantae,3GIVS@35493|Streptophyta	35493|Streptophyta	S	Belongs to the plant LTP family	-	GO:0005575,GO:0005623,GO:0005886,GO:0016020,GO:0031224,GO:0031225,GO:0031226,GO:0044425,GO:0044459,GO:0044464,GO:0046658,GO:0071944	-	-	-	-	-	-	-	-	-	-	LTP_2
file_1_file_1_jg12613.t1	71139.XP_010024243.1	9.18e-81	243	2EJF1@1|root,2SPM6@2759|Eukaryota,38065@33090|Viridiplantae,3GJIG@35493|Streptophyta	35493|Streptophyta	O	Belongs to the plant LTP family	-	-	-	-	-	-	-	-	-	-	-	-	LTP_2
file_1_file_1_jg12613.t2	71139.XP_010024243.1	1.19e-85	256	2EJF1@1|root,2SPM6@2759|Eukaryota,38065@33090|Viridiplantae,3GJIG@35493|Streptophyta	35493|Streptophyta	O	Belongs to the plant LTP family	-	-	-	-	-	-	-	-	-	-	-	-	LTP_2
file_1_file_1_jg12614.t1	71139.XP_010026942.1	2.73e-43	151	2E2W7@1|root,2SA2F@2759|Eukaryota,37WXQ@33090|Viridiplantae,3GKSP@35493|Streptophyta	35493|Streptophyta	S	Bifunctional inhibitor lipid-transfer protein seed storage 2S albumin superfamily protein	-	-	-	-	-	-	-	-	-	-	-	-	LTP_2
file_1_file_1_jg12615.t1	71139.XP_010024242.1	0	1477	COG1112@1|root,KOG1804@2759|Eukaryota,37IG3@33090|Viridiplantae,3G7MP@35493|Streptophyta	35493|Streptophyta	L	RNA helicase	-	GO:0002252,GO:0002376,GO:0003674,GO:0003724,GO:0003824,GO:0004386,GO:0006950,GO:0006952,GO:0006955,GO:0008150,GO:0009605,GO:0009607,GO:0009615,GO:0009616,GO:0009892,GO:0009987,GO:0010468,GO:0010605,GO:0010608,GO:0010629,GO:0016441,GO:0016458,GO:0016462,GO:0016787,GO:0016817,GO:0016818,GO:0017111,GO:0019222,GO:0031047,GO:0035194,GO:0035821,GO:0040029,GO:0043207,GO:0044003,GO:0044403,GO:0044419,GO:…	3.6.4.13	ko:K18422	-	-	-	-	ko00000,ko01000,ko03019,ko03036	-	-	-	AAA_11,AAA_12
file_1_file_2_15065_t	71139.XP_010024242.1	0	1531	COG1112@1|root,KOG1804@2759|Eukaryota,37IG3@33090|Viridiplantae,3G7MP@35493|Streptophyta	35493|Streptophyta	L	RNA helicase	-	GO:0002252,GO:0002376,GO:0003674,GO:0003724,GO:0003824,GO:0004386,GO:0006950,GO:0006952,GO:0006955,GO:0008150,GO:0009605,GO:0009607,GO:0009615,GO:0009616,GO:0009892,GO:0009987,GO:0010468,GO:0010605,GO:0010608,GO:0010629,GO:0016441,GO:0016458,GO:0016462,GO:0016787,GO:0016817,GO:0016818,GO:0017111,GO:0019222,GO:0031047,GO:0035194,GO:0035821,GO:0040029,GO:0043207,GO:0044003,GO:0044403,GO:0044419,GO:…	3.6.4.13	ko:K18422	-	-	-	-	ko00000,ko01000,ko03019,ko03036	-	-	-	AAA_11,AAA_12
file_1_file_1_jg12617.t1	3641.EOY05736	1.19e-135	385	COG0638@1|root,KOG0177@2759|Eukaryota,37JUV@33090|Viridiplantae,3GD48@35493|Streptophyta	35493|Streptophyta	O	The proteasome is a multicatalytic proteinase complex which is characterized by its ability to cleave peptides with Arg, Phe, Tyr, Leu, and Glu adjacent to the leaving group at neutral or slightly basic pH	PBD1	GO:0000502,GO:0005575,GO:0005576,GO:0005622,GO:0005623,GO:0005737,GO:0005773,GO:0005774,GO:0005829,GO:0005839,GO:0005886,GO:0016020,GO:0019774,GO:0031090,GO:0032991,GO:0043226,GO:0043227,GO:0043229,GO:0043231,GO:0044422,GO:0044424,GO:0044437,GO:0044444,GO:0044446,GO:0044464,GO:0048046,GO:0071944,GO:0098588,GO:0098805,GO:1902494,GO:1905368,GO:1905369	3.4.25.1	ko:K02734	ko03050,map03050	M00337,M00340	-	-	ko00000,ko00001,ko00002,ko01000,ko01002,ko03051	-	-	-	Proteasome
file_1_file_1_jg12618.t1	3694.POPTR_0010s09480.1	2.76e-13	67	2E6GR@1|root,2SD6C@2759|Eukaryota,37XI4@33090|Viridiplantae,3GMM6@35493|Streptophyta,4JVDI@91835|fabids	35493|Streptophyta	S	pollen allergen Ole e 6-like	-	-	-	-	-	-	-	-	-	-	-	-	Ole-e-6
file_1_file_1_jg12619.t1	71139.XP_010026941.1	5.41e-142	430	2BZUX@1|root,2QQEP@2759|Eukaryota,37PWS@33090|Viridiplantae,3G8UA@35493|Streptophyta	35493|Streptophyta	S	Vicilin-like antimicrobial peptides	-	GO:0005575,GO:0005618,GO:0005622,GO:0005623,GO:0005737,GO:0005773,GO:0006950,GO:0006952,GO:0008150,GO:0009505,GO:0009605,GO:0009607,GO:0009615,GO:0009620,GO:0009719,GO:0009725,GO:0009735,GO:0010033,GO:0030312,GO:0031410,GO:0031982,GO:0033095,GO:0042221,GO:0043207,GO:0043226,GO:0043227,GO:0043229,GO:0043231,GO:0044424,GO:0044444,GO:0044464,GO:0050832,GO:0050896,GO:0051704,GO:0051707,GO:0071944,GO:…	-	ko:K18626	-	-	-	-	ko00000,ko04812	-	-	-	Cupin_1,Vicilin_N
file_1_file_1_jg12620.t1	3847.GLYMA20G34830.1	2.73e-23	90.5	2CIZ4@1|root,2S6W9@2759|Eukaryota	2759|Eukaryota	S	serine-type endopeptidase inhibitor activity	-	-	-	-	-	-	-	-	-	-	-	-	potato_inhibit
file_1_file_1_jg12622.t1	71139.XP_010024026.1	3.14e-200	583	28JSW@1|root,2SJ4F@2759|Eukaryota,37Y6T@33090|Viridiplantae,3GN90@35493|Streptophyta	35493|Streptophyta	S	Sieve element occlusion	SEOa	-	-	-	-	-	-	-	-	-	-	-	SEO_C,SEO_N
file_1_file_1_jg12623.t1	2711.XP_006489432.1	2.5e-11	67.4	2CZF0@1|root,2SA2Y@2759|Eukaryota,37WSC@33090|Viridiplantae,3GMF2@35493|Streptophyta	35493|Streptophyta	S	zinc-finger of the FCS-type, C2-C2	-	-	-	-	-	-	-	-	-	-	-	-	zf-FLZ
file_1_file_1_jg12624.t1	71139.XP_010043931.1	0.000232	45.1	28HFA@1|root,2QPTA@2759|Eukaryota,37JZW@33090|Viridiplantae,3GE2C@35493|Streptophyta	35493|Streptophyta	S	oberon 3	-	GO:0001708,GO:0007275,GO:0007389,GO:0008150,GO:0009653,GO:0009790,GO:0009880,GO:0009888,GO:0009933,GO:0009987,GO:0010014,GO:0030154,GO:0032501,GO:0032502,GO:0045165,GO:0048507,GO:0048532,GO:0048856,GO:0048869,GO:0090421	-	-	-	-	-	-	-	-	-	-	Oberon_cc,PHD_Oberon
file_1_file_1_jg12625.t1	2711.XP_006489432.1	5.3e-11	65.1	2CZF0@1|root,2SA2Y@2759|Eukaryota,37WSC@33090|Viridiplantae,3GMF2@35493|Streptophyta	35493|Streptophyta	S	zinc-finger of the FCS-type, C2-C2	-	-	-	-	-	-	-	-	-	-	-	-	zf-FLZ
file_1_file_1_jg12626.t1	2711.XP_006489432.1	1.33e-07	56.2	2CZF0@1|root,2SA2Y@2759|Eukaryota,37WSC@33090|Viridiplantae,3GMF2@35493|Streptophyta	35493|Streptophyta	S	zinc-finger of the FCS-type, C2-C2	-	-	-	-	-	-	-	-	-	-	-	-	zf-FLZ
file_1_file_1_jg12627.t1	2711.XP_006489432.1	8.76e-10	64.7	2CZF0@1|root,2SA2Y@2759|Eukaryota,37WSC@33090|Viridiplantae,3GMF2@35493|Streptophyta	35493|Streptophyta	S	zinc-finger of the FCS-type, C2-C2	-	-	-	-	-	-	-	-	-	-	-	-	zf-FLZ
file_1_file_1_jg12631.t1	71139.XP_010024238.1	0	1024	COG5411@1|root,KOG0565@2759|Eukaryota,37S50@33090|Viridiplantae,3G8HE@35493|Streptophyta	35493|Streptophyta	U	Type I inositol 1,4,5-trisphosphate 5-phosphatase CVP2-like	-	GO:0000003,GO:0001101,GO:0003002,GO:0003006,GO:0003674,GO:0003824,GO:0004439,GO:0005575,GO:0005622,GO:0005623,GO:0005634,GO:0005886,GO:0005975,GO:0006066,GO:0006629,GO:0006644,GO:0006650,GO:0006793,GO:0006796,GO:0006950,GO:0006970,GO:0007154,GO:0007165,GO:0007275,GO:0007389,GO:0008150,GO:0008152,GO:0009056,GO:0009628,GO:0009651,GO:0009653,GO:0009719,GO:0009725,GO:0009737,GO:0009790,GO:0009791,GO:…	3.1.3.36	ko:K20279	ko00562,ko01100,ko04070,map00562,map01100,map04070	-	R04404,R09827	RC00078	ko00000,ko00001,ko01000,ko04131	-	-	-	Exo_endo_phos
file_1_file_1_jg12632.t1	71139.XP_010024236.1	1.63e-190	553	KOG4197@1|root,KOG4197@2759|Eukaryota,37HPG@33090|Viridiplantae,3GH83@35493|Streptophyta	35493|Streptophyta	S	Pentatricopeptide repeat-containing protein At3g22670	-	GO:0003674,GO:0003676,GO:0003723,GO:0003824,GO:0004518,GO:0004519,GO:0005488,GO:0005575,GO:0005622,GO:0005623,GO:0006139,GO:0006725,GO:0006807,GO:0008150,GO:0008152,GO:0009451,GO:0009987,GO:0016070,GO:0016787,GO:0016788,GO:0034641,GO:0043170,GO:0043226,GO:0043227,GO:0043229,GO:0043231,GO:0043412,GO:0044237,GO:0044238,GO:0044424,GO:0044464,GO:0046483,GO:0071704,GO:0090304,GO:0090305,GO:0097159,GO:…	-	-	-	-	-	-	-	-	-	-	PPR,PPR_1,PPR_2,PPR_3
file_1_file_1_jg12633.t1	71139.XP_010024237.1	1.33e-95	281	KOG4282@1|root,KOG4282@2759|Eukaryota,3891A@33090|Viridiplantae,3GXW2@35493|Streptophyta	35493|Streptophyta	S	RNA-directed DNA methylation 1	-	-	-	-	-	-	-	-	-	-	-	-	RdDM_RDM1
file_1_file_1_jg12634.t1	71139.XP_010024235.1	4.56e-226	625	COG0646@1|root,KOG1579@2759|Eukaryota,37N1K@33090|Viridiplantae,3GAMZ@35493|Streptophyta	35493|Streptophyta	E	Homocysteine s-methyltransferase	HMT3	GO:0005575,GO:0005623,GO:0005886,GO:0016020,GO:0044464,GO:0071944	2.1.1.10	ko:K00547	ko00270,ko01100,ko01110,map00270,map01100,map01110	-	R00650	RC00003,RC00035	ko00000,ko00001,ko01000	-	-	-	S-methyl_trans
file_1_file_1_jg12635.t1	71139.XP_010024234.1	1.2e-264	726	COG0515@1|root,KOG0192@2759|Eukaryota,37MFU@33090|Viridiplantae,3G8KT@35493|Streptophyta	35493|Streptophyta	T	serine threonine-protein kinase	-	-	-	-	-	-	-	-	-	-	-	-	Pkinase_Tyr
file_1_file_1_jg12636.t1	71139.XP_010024233.1	0	1254	KOG1171@1|root,KOG1171@2759|Eukaryota,37RBY@33090|Viridiplantae,3GH1W@35493|Streptophyta	35493|Streptophyta	P	tesmin tso1-like cxc	-	GO:0000003,GO:0001067,GO:0003006,GO:0003674,GO:0003676,GO:0003677,GO:0003700,GO:0005488,GO:0005575,GO:0005622,GO:0005623,GO:0005634,GO:0006355,GO:0007275,GO:0008150,GO:0009653,GO:0009791,GO:0009889,GO:0009908,GO:0009934,GO:0010468,GO:0010556,GO:0019219,GO:0019222,GO:0022414,GO:0022603,GO:0031323,GO:0031326,GO:0032501,GO:0032502,GO:0043226,GO:0043227,GO:0043229,GO:0043231,GO:0043565,GO:0044212,GO:…	-	ko:K21776	ko04218,map04218	-	-	-	ko00000,ko00001	-	-	-	TCR
file_1_file_1_jg12638.t1	71139.XP_010024232.1	0	2276	2C248@1|root,2QQ6M@2759|Eukaryota,37RJW@33090|Viridiplantae,3G86G@35493|Streptophyta	35493|Streptophyta	S	Kinase interacting (KIP1-like) family protein	-	GO:0003674,GO:0003779,GO:0005488,GO:0005515,GO:0005575,GO:0005622,GO:0005623,GO:0005634,GO:0005886,GO:0005911,GO:0008092,GO:0009506,GO:0016020,GO:0030054,GO:0043226,GO:0043227,GO:0043229,GO:0043231,GO:0044424,GO:0044464,GO:0044877,GO:0051015,GO:0055044,GO:0071944	-	ko:K20478	-	-	-	-	ko00000,ko04131	-	-	-	KIP1
file_1_file_1_jg12639.t1	71139.XP_010024230.1	1.49e-180	503	COG1890@1|root,KOG1628@2759|Eukaryota,37MQG@33090|Viridiplantae,3G8TI@35493|Streptophyta	35493|Streptophyta	J	Belongs to the eukaryotic ribosomal protein eS1 family	-	-	-	ko:K02984	ko03010,map03010	M00177,M00179	-	-	br01610,ko00000,ko00001,ko00002,ko03011	-	-	-	Ribosomal_S3Ae
file_1_file_1_jg12640.t1	71139.XP_010026143.1	2.51e-09	63.5	28MSX@1|root,2QVV7@2759|Eukaryota,37IPW@33090|Viridiplantae,3GFU1@35493|Streptophyta	35493|Streptophyta	K	Zinc finger protein	-	GO:0001067,GO:0003674,GO:0003676,GO:0003677,GO:0003700,GO:0005488,GO:0006355,GO:0008150,GO:0009889,GO:0010468,GO:0010556,GO:0019219,GO:0019222,GO:0031323,GO:0031326,GO:0043565,GO:0044212,GO:0050789,GO:0050794,GO:0051171,GO:0051252,GO:0060255,GO:0065007,GO:0080090,GO:0097159,GO:0140110,GO:1901363,GO:1903506,GO:2000112,GO:2001141	-	-	-	-	-	-	-	-	-	-	CCT,zf-B_box
file_1_file_1_jg12640.t2	3827.XP_004512447.1	8.69e-28	110	2DANQ@1|root,2S5G7@2759|Eukaryota,37WCG@33090|Viridiplantae,3GJRI@35493|Streptophyta,4JQ1H@91835|fabids	35493|Streptophyta	S	Ribosomal protein L35	-	-	-	-	-	-	-	-	-	-	-	-	Ribosomal_L35p
file_1_file_1_jg12641.t1	71139.XP_010024229.1	1.96e-118	356	2CN1T@1|root,2QTD8@2759|Eukaryota,37SGN@33090|Viridiplantae,3GBP4@35493|Streptophyta	35493|Streptophyta	S	leucine-rich repeat extensin-like protein	-	GO:0003674,GO:0005198,GO:0005199	-	-	-	-	-	-	-	-	-	-	LRRNT_2,LRR_1,LRR_6,LRR_8
file_1_file_1_jg12643.t1	71139.XP_010024228.1	3.61e-206	573	COG0457@1|root,KOG2449@1|root,KOG0548@2759|Eukaryota,KOG2449@2759|Eukaryota,37HMC@33090|Viridiplantae,3GDWU@35493|Streptophyta	35493|Streptophyta	EGO	Tetratricopeptide repeat (TPR)-like superfamily protein	-	GO:0003674,GO:0005488,GO:0005515,GO:0042802,GO:0042803,GO:0046982,GO:0046983	-	-	-	-	-	-	-	-	-	-	TPR_1,TPR_11,TPR_2,TPR_8
file_1_file_1_jg12645.t1	71139.XP_010024227.1	0	1176	COG0659@1|root,KOG0236@2759|Eukaryota,37M8H@33090|Viridiplantae,3G9ZH@35493|Streptophyta	35493|Streptophyta	P	sulfate transporter	-	GO:0003674,GO:0005215,GO:0005575,GO:0005622,GO:0005623,GO:0005737,GO:0005886,GO:0005887,GO:0006810,GO:0006811,GO:0006820,GO:0008150,GO:0008272,GO:0008509,GO:0009507,GO:0009536,GO:0015075,GO:0015103,GO:0015116,GO:0015318,GO:0015698,GO:0016020,GO:0016021,GO:0022857,GO:0031224,GO:0031226,GO:0034220,GO:0043226,GO:0043227,GO:0043229,GO:0043231,GO:0044424,GO:0044425,GO:0044444,GO:0044459,GO:0044464,GO:…	-	ko:K17471	-	-	-	-	ko00000,ko02000	2.A.53.1	-	-	STAS,Sulfate_transp
file_1_file_1_jg12646.t1	3694.POPTR_0008s15660.1	1.43e-65	211	2A3IX@1|root,2RY5E@2759|Eukaryota,37TR7@33090|Viridiplantae,3GI38@35493|Streptophyta,4JP95@91835|fabids	35493|Streptophyta	-	-	-	-	-	-	-	-	-	-	-	-	-	-	-
file_1_file_1_jg12648.t1	71139.XP_010024225.1	7.01e-80	238	KOG4168@1|root,KOG4168@2759|Eukaryota,37V7A@33090|Viridiplantae,3GJEN@35493|Streptophyta	35493|Streptophyta	K	DNA-directed RNA polymerase III subunit	-	GO:0000428,GO:0003674,GO:0003824,GO:0003899,GO:0005575,GO:0005622,GO:0005623,GO:0005634,GO:0005654,GO:0005666,GO:0005737,GO:0005886,GO:0006139,GO:0006351,GO:0006352,GO:0006383,GO:0006384,GO:0006725,GO:0006807,GO:0007568,GO:0008150,GO:0008152,GO:0009058,GO:0009059,GO:0009360,GO:0009987,GO:0010467,GO:0016020,GO:0016070,GO:0016740,GO:0016772,GO:0016779,GO:0018130,GO:0019438,GO:0030424,GO:0030425,GO:…	-	-	-	-	-	-	-	-	-	-	RNA_pol_Rpb4
file_1_file_1_jg12649.t1	71139.XP_010026937.1	1.95e-45	149	2CYDY@1|root,2S3SX@2759|Eukaryota,37VZ1@33090|Viridiplantae,3GK79@35493|Streptophyta	35493|Streptophyta	S	EPIDERMAL PATTERNING FACTOR-like protein	-	-	-	-	-	-	-	-	-	-	-	-	EPF
file_1_file_1_jg12650.t1	71139.XP_010024224.1	1.1e-153	440	28PP4@1|root,2QWBC@2759|Eukaryota,37SEM@33090|Viridiplantae,3GBKZ@35493|Streptophyta	35493|Streptophyta	S	Protein TIFY 4B-like isoform X1	BS1	GO:0003674,GO:0003712,GO:0003714,GO:0005575,GO:0005622,GO:0005623,GO:0005634,GO:0006950,GO:0007275,GO:0008150,GO:0009611,GO:0009889,GO:0009890,GO:0009892,GO:0009966,GO:0010556,GO:0010558,GO:0010605,GO:0010646,GO:0019219,GO:0019222,GO:0023051,GO:0031323,GO:0031324,GO:0031326,GO:0031327,GO:0031347,GO:0032501,GO:0032502,GO:0042127,GO:0043226,GO:0043227,GO:0043229,GO:0043231,GO:0044424,GO:0044464,GO:…	-	-	-	-	-	-	-	-	-	-	CCT_2,tify
file_1_file_1_jg12651.t1	71139.XP_010024223.1	2.07e-127	363	COG1791@1|root,KOG2107@2759|Eukaryota,37MD0@33090|Viridiplantae,3G9K8@35493|Streptophyta	35493|Streptophyta	E	Catalyzes the formation of formate and 2-keto-4- methylthiobutyrate (KMTB) from 1,2-dihydroxy-3-keto-5- methylthiopentene (DHK-MTPene)	ARD	GO:0000096,GO:0001871,GO:0003674,GO:0003824,GO:0005488,GO:0005506,GO:0006082,GO:0006520,GO:0006555,GO:0006790,GO:0006807,GO:0008150,GO:0008152,GO:0009066,GO:0009987,GO:0010297,GO:0010309,GO:0016491,GO:0016701,GO:0016702,GO:0019752,GO:0030246,GO:0030247,GO:0043167,GO:0043169,GO:0043436,GO:0044237,GO:0044238,GO:0044281,GO:0046872,GO:0046914,GO:0050789,GO:0050794,GO:0051213,GO:0051302,GO:0055114,GO:…	1.13.11.53,1.13.11.54	ko:K08967	ko00270,ko01100,map00270,map01100	M00034	R07363,R07364	RC01866,RC02018,RC02118	ko00000,ko00001,ko00002,ko01000	-	-	-	ARD
file_1_file_1_jg12652.t1	71139.XP_010024221.1	1.61e-226	629	COG5169@1|root,KOG0627@2759|Eukaryota,37TD1@33090|Viridiplantae,3GGIR@35493|Streptophyta	35493|Streptophyta	K	Heat Stress Transcription Factor	-	GO:0003674,GO:0003700,GO:0006355,GO:0008150,GO:0009889,GO:0010468,GO:0010556,GO:0019219,GO:0019222,GO:0031323,GO:0031326,GO:0050789,GO:0050794,GO:0051171,GO:0051252,GO:0060255,GO:0065007,GO:0080090,GO:0140110,GO:1903506,GO:2000112,GO:2001141	-	ko:K09419	-	-	-	-	ko00000,ko03000	-	-	-	HSF_DNA-bind
file_1_file_1_jg12654.t1	71139.XP_010024220.1	0	1302	KOG2225@1|root,KOG2225@2759|Eukaryota,37KPT@33090|Viridiplantae,3GH2G@35493|Streptophyta	35493|Streptophyta	S	Dymeclin-like	-	-	-	-	-	-	-	-	-	-	-	-	Dymeclin
file_1_file_1_jg12655.t1	71139.XP_010024219.1	0	926	KOG4197@1|root,KOG4197@2759|Eukaryota,37IBC@33090|Viridiplantae,3GBD1@35493|Streptophyta	35493|Streptophyta	S	Pentatricopeptide repeat-containing protein	-	GO:0003674,GO:0003676,GO:0003723,GO:0003824,GO:0004518,GO:0004519,GO:0005488,GO:0005575,GO:0005622,GO:0005623,GO:0006139,GO:0006725,GO:0006807,GO:0008150,GO:0008152,GO:0009451,GO:0009987,GO:0016070,GO:0016787,GO:0016788,GO:0034641,GO:0043170,GO:0043226,GO:0043227,GO:0043229,GO:0043231,GO:0043412,GO:0044237,GO:0044238,GO:0044424,GO:0044464,GO:0046483,GO:0071704,GO:0090304,GO:0090305,GO:0097159,GO:…	-	-	-	-	-	-	-	-	-	-	DYW_deaminase,PPR,PPR_2
file_1_file_1_jg12656.t1	71139.XP_010024218.1	2.4e-310	849	COG2046@1|root,KOG0636@2759|Eukaryota,37M16@33090|Viridiplantae,3G7IZ@35493|Streptophyta	35493|Streptophyta	P	atp sulfurylase	-	GO:0000103,GO:0001887,GO:0003674,GO:0003824,GO:0004020,GO:0004779,GO:0004781,GO:0005575,GO:0005622,GO:0005623,GO:0005737,GO:0005739,GO:0005886,GO:0006790,GO:0006793,GO:0006796,GO:0006950,GO:0007154,GO:0008150,GO:0008152,GO:0009267,GO:0009507,GO:0009532,GO:0009536,GO:0009570,GO:0009605,GO:0009719,GO:0009725,GO:0009735,GO:0009970,GO:0009987,GO:0009991,GO:0010033,GO:0010035,GO:0010038,GO:0016020,GO:…	2.7.1.25,2.7.7.4	ko:K13811	ko00230,ko00261,ko00450,ko00920,ko01100,ko01120,ko01130,map00230,map00261,map00450,map00920,map01100,map01120,map01130	M00176	R00509,R00529,R04928,R04929	RC00002,RC00078,RC02809,RC02889	ko00000,ko00001,ko00002,ko01000	-	-	-	ATP-sulfurylase,PUA_2
file_1_file_1_jg12657.t1	71139.XP_010024217.1	0	914	2BZXK@1|root,2QQCX@2759|Eukaryota,37R0N@33090|Viridiplantae,3GFII@35493|Streptophyta	35493|Streptophyta	-	-	-	-	-	-	-	-	-	-	-	-	-	-	-
file_1_file_1_jg12659.t1	71139.XP_010024216.1	1.43e-70	216	COG5126@1|root,KOG0027@2759|Eukaryota,37TRC@33090|Viridiplantae,3GI7D@35493|Streptophyta	35493|Streptophyta	T	calmodulin-like protein	-	GO:0005513,GO:0007154,GO:0007165,GO:0008150,GO:0009593,GO:0009987,GO:0010035,GO:0010038,GO:0019722,GO:0019932,GO:0023052,GO:0035556,GO:0042221,GO:0050789,GO:0050794,GO:0050896,GO:0051592,GO:0051606,GO:0051716,GO:0065007	-	ko:K02183,ko:K13448	ko04014,ko04015,ko04016,ko04020,ko04022,ko04024,ko04070,ko04114,ko04218,ko04261,ko04270,ko04371,ko04626,ko04713,ko04720,ko04722,ko04728,ko04740,ko04744,ko04745,ko04750,ko04910,ko04912,ko04915,ko04916,ko04921,ko04922,ko04924,ko04925,ko04970,ko04971,ko05010,ko05031,ko05034,ko05133,ko05152,ko05167,ko05200,ko05214,ko05418,map04014,map04015,map04016,map04020,map04022,map04024,map04070,map04114,map0421…	-	-	-	ko00000,ko00001,ko01009,ko03036,ko04131,ko04147	-	-	-	EF-hand_1,EF-hand_7
file_1_file_1_jg12660.t1	71139.XP_010024213.1	1.44e-243	688	2CMWC@1|root,2QSD3@2759|Eukaryota,37ISX@33090|Viridiplantae,3GDPJ@35493|Streptophyta	35493|Streptophyta	-	-	-	-	-	-	-	-	-	-	-	-	-	-	-
file_1_file_1_jg12662.t1	3760.EMJ10994	1.86e-06	49.7	29075@1|root,2R726@2759|Eukaryota,387JX@33090|Viridiplantae,3GS94@35493|Streptophyta,4JV70@91835|fabids	35493|Streptophyta	-	-	-	-	-	-	-	-	-	-	-	-	-	-	-
file_1_file_1_jg12663.t1	71139.XP_010026933.1	1.72e-54	181	2CPQH@1|root,2S439@2759|Eukaryota,37VZP@33090|Viridiplantae,3GK86@35493|Streptophyta	35493|Streptophyta	S	Guanine nucleotide-binding protein subunit gamma	-	GO:0005575,GO:0005622,GO:0005623,GO:0005834,GO:0005886,GO:0006464,GO:0006497,GO:0006807,GO:0006810,GO:0007275,GO:0008150,GO:0008152,GO:0009058,GO:0009059,GO:0009791,GO:0009845,GO:0009898,GO:0009914,GO:0009926,GO:0009987,GO:0010540,GO:0010817,GO:0016020,GO:0018342,GO:0018345,GO:0019538,GO:0019897,GO:0019898,GO:0022622,GO:0031234,GO:0032501,GO:0032502,GO:0032991,GO:0034645,GO:0036211,GO:0042157,GO:…	-	-	-	-	-	-	-	-	-	-	G-gamma
file_1_file_1_jg12665.t1	71139.XP_010024209.1	9.9e-200	563	28JB2@1|root,2QRQ0@2759|Eukaryota,37QXK@33090|Viridiplantae,3GEPY@35493|Streptophyta	35493|Streptophyta	S	Plant-specific domain TIGR01615 family protein	-	-	-	-	-	-	-	-	-	-	-	-	PDDEXK_6
file_1_file_1_jg12666.t1	71139.XP_010040366.1	0	888	COG0277@1|root,KOG1231@2759|Eukaryota,37MZN@33090|Viridiplantae,3GFKI@35493|Streptophyta	35493|Streptophyta	C	Cytokinin dehydrogenase	CKX3	GO:0003674,GO:0003824,GO:0005575,GO:0005576,GO:0005615,GO:0005622,GO:0005623,GO:0005737,GO:0005773,GO:0005783,GO:0005788,GO:0006725,GO:0006807,GO:0008131,GO:0008150,GO:0008152,GO:0009056,GO:0009308,GO:0009690,GO:0009823,GO:0009987,GO:0010817,GO:0012505,GO:0016491,GO:0016638,GO:0016641,GO:0016645,GO:0019139,GO:0031974,GO:0034754,GO:0042445,GO:0042447,GO:0043226,GO:0043227,GO:0043229,GO:0043231,GO:…	1.5.99.12	ko:K00279	ko00908,map00908	-	R05708	RC00121,RC01455	ko00000,ko00001,ko01000	-	-	-	Cytokin-bind,FAD_binding_4
file_1_file_1_jg12667.t1	4530.OS06T0159700-00	2.42e-20	89.4	2F0K4@1|root,2T1R4@2759|Eukaryota,382BP@33090|Viridiplantae,3GRM9@35493|Streptophyta	35493|Streptophyta	-	-	-	-	-	-	-	-	-	-	-	-	-	-	-
file_1_file_1_jg12668.t1	71139.XP_010024059.1	2.04e-100	307	COG0277@1|root,KOG1231@2759|Eukaryota,37MZN@33090|Viridiplantae,3GFKI@35493|Streptophyta	35493|Streptophyta	C	Cytokinin dehydrogenase	CKX3	GO:0003674,GO:0003824,GO:0005575,GO:0005576,GO:0005615,GO:0005622,GO:0005623,GO:0005737,GO:0005773,GO:0005783,GO:0005788,GO:0006725,GO:0006807,GO:0008131,GO:0008150,GO:0008152,GO:0009056,GO:0009308,GO:0009690,GO:0009823,GO:0009987,GO:0010817,GO:0012505,GO:0016491,GO:0016638,GO:0016641,GO:0016645,GO:0019139,GO:0031974,GO:0034754,GO:0042445,GO:0042447,GO:0043226,GO:0043227,GO:0043229,GO:0043231,GO:…	1.5.99.12	ko:K00279	ko00908,map00908	-	R05708	RC00121,RC01455	ko00000,ko00001,ko01000	-	-	-	Cytokin-bind,FAD_binding_4
file_1_file_1_jg12669.t1	71139.XP_010024059.1	1.58e-140	410	COG0277@1|root,KOG1231@2759|Eukaryota,37MZN@33090|Viridiplantae,3GFKI@35493|Streptophyta	35493|Streptophyta	C	Cytokinin dehydrogenase	CKX3	GO:0003674,GO:0003824,GO:0005575,GO:0005576,GO:0005615,GO:0005622,GO:0005623,GO:0005737,GO:0005773,GO:0005783,GO:0005788,GO:0006725,GO:0006807,GO:0008131,GO:0008150,GO:0008152,GO:0009056,GO:0009308,GO:0009690,GO:0009823,GO:0009987,GO:0010817,GO:0012505,GO:0016491,GO:0016638,GO:0016641,GO:0016645,GO:0019139,GO:0031974,GO:0034754,GO:0042445,GO:0042447,GO:0043226,GO:0043227,GO:0043229,GO:0043231,GO:…	1.5.99.12	ko:K00279	ko00908,map00908	-	R05708	RC00121,RC01455	ko00000,ko00001,ko01000	-	-	-	Cytokin-bind,FAD_binding_4
file_1_file_1_jg12670.t1	71139.XP_010024059.1	0	872	COG0277@1|root,KOG1231@2759|Eukaryota,37MZN@33090|Viridiplantae,3GFKI@35493|Streptophyta	35493|Streptophyta	C	Cytokinin dehydrogenase	CKX3	GO:0003674,GO:0003824,GO:0005575,GO:0005576,GO:0005615,GO:0005622,GO:0005623,GO:0005737,GO:0005773,GO:0005783,GO:0005788,GO:0006725,GO:0006807,GO:0008131,GO:0008150,GO:0008152,GO:0009056,GO:0009308,GO:0009690,GO:0009823,GO:0009987,GO:0010817,GO:0012505,GO:0016491,GO:0016638,GO:0016641,GO:0016645,GO:0019139,GO:0031974,GO:0034754,GO:0042445,GO:0042447,GO:0043226,GO:0043227,GO:0043229,GO:0043231,GO:…	1.5.99.12	ko:K00279	ko00908,map00908	-	R05708	RC00121,RC01455	ko00000,ko00001,ko01000	-	-	-	Cytokin-bind,FAD_binding_4
file_1_file_1_jg12671.t1	71139.XP_010024058.1	9.23e-291	798	28MHJ@1|root,2QU15@2759|Eukaryota,37QEQ@33090|Viridiplantae,3GEK5@35493|Streptophyta	35493|Streptophyta	-	-	-	-	-	-	-	-	-	-	-	-	-	-	BAF250_C
file_1_file_1_jg12672.t1	71139.XP_010024057.1	0	965	COG3424@1|root,2QPKZ@2759|Eukaryota,37K20@33090|Viridiplantae,3GA34@35493|Streptophyta	35493|Streptophyta	I	3-ketoacyl-coa synthase	KCS2	GO:0003674,GO:0003824,GO:0004312,GO:0006725,GO:0006950,GO:0006970,GO:0008150,GO:0008152,GO:0009058,GO:0009266,GO:0009314,GO:0009409,GO:0009416,GO:0009611,GO:0009628,GO:0009698,GO:0009699,GO:0009922,GO:0009987,GO:0010345,GO:0016740,GO:0016746,GO:0016747,GO:0019438,GO:0019748,GO:0044237,GO:0044249,GO:0044550,GO:0050896,GO:0071704,GO:1901360,GO:1901362,GO:1901576	2.3.1.199	ko:K15397	ko00062,ko01110,map00062,map01110	M00415	R09419,R10825	RC00004,RC02888,RC02997	ko00000,ko00001,ko00002,ko01000	-	-	-	ACP_syn_III_C,FAE1_CUT1_RppA
file_1_file_1_jg12673.t1	71139.XP_010024056.1	0	1687	KOG0167@1|root,KOG0167@2759|Eukaryota,37Q8F@33090|Viridiplantae,3G8MW@35493|Streptophyta	35493|Streptophyta	S	U-box domain-containing protein	-	-	-	-	-	-	-	-	-	-	-	-	U-box
file_1_file_1_jg12673.t2	71139.XP_010024056.1	0	901	KOG0167@1|root,KOG0167@2759|Eukaryota,37Q8F@33090|Viridiplantae,3G8MW@35493|Streptophyta	35493|Streptophyta	S	U-box domain-containing protein	-	-	-	-	-	-	-	-	-	-	-	-	U-box
file_1_file_2_15125_t	71139.XP_010024056.1	0	930	KOG0167@1|root,KOG0167@2759|Eukaryota,37Q8F@33090|Viridiplantae,3G8MW@35493|Streptophyta	35493|Streptophyta	S	U-box domain-containing protein	-	-	-	-	-	-	-	-	-	-	-	-	U-box
file_1_file_1_jg12674.t1	71139.XP_010024055.1	1.85e-44	144	2CYCQ@1|root,2S3KV@2759|Eukaryota,37W49@33090|Viridiplantae,3GK3U@35493|Streptophyta	35493|Streptophyta	S	Pet100	-	-	-	ko:K18187	-	-	-	-	ko00000,ko03029	-	-	-	Pet100
file_1_file_2_15127_t	71139.XP_010024055.1	1.48e-38	130	2CYCQ@1|root,2S3KV@2759|Eukaryota,37W49@33090|Viridiplantae,3GK3U@35493|Streptophyta	35493|Streptophyta	S	Pet100	-	-	-	ko:K18187	-	-	-	-	ko00000,ko03029	-	-	-	Pet100
file_1_file_1_jg12675.t1	71139.XP_010024054.1	1.34e-263	728	KOG0583@1|root,KOG0583@2759|Eukaryota,37KQI@33090|Viridiplantae,3G999@35493|Streptophyta	35493|Streptophyta	T	Non-specific serine threonine protein kinase	CIPK7	GO:0003674,GO:0003824,GO:0004672,GO:0004674,GO:0005575,GO:0005622,GO:0005623,GO:0005634,GO:0005737,GO:0006464,GO:0006468,GO:0006793,GO:0006796,GO:0006807,GO:0006950,GO:0007154,GO:0007165,GO:0008150,GO:0008152,GO:0009266,GO:0009409,GO:0009628,GO:0009987,GO:0016301,GO:0016310,GO:0016740,GO:0016772,GO:0016773,GO:0019538,GO:0023052,GO:0035556,GO:0036211,GO:0043170,GO:0043226,GO:0043227,GO:0043229,GO:…	2.7.11.1	ko:K03116,ko:K12761	ko03060,ko03070,ko04113,ko04138,map03060,map03070,map04113,map04138	M00336	-	-	ko00000,ko00001,ko00002,ko01000,ko01001,ko02044	2.A.64	-	-	NAF,Pkinase
file_1_file_1_jg4537.t1	71139.XP_010038307.1	8.67e-111	325	COG5147@1|root,KOG0048@2759|Eukaryota,37Q2N@33090|Viridiplantae,3GFUJ@35493|Streptophyta	35493|Streptophyta	K	transcription factor	-	-	-	ko:K09422	-	-	-	-	ko00000,ko03000	-	-	-	Myb_DNA-binding
file_1_file_1_jg4539.t1	71139.XP_010038306.1	1.53e-212	591	COG3491@1|root,KOG0143@2759|Eukaryota,37R49@33090|Viridiplantae,3G77N@35493|Streptophyta	35493|Streptophyta	Q	Belongs to the iron ascorbate-dependent oxidoreductase family	-	GO:0003674,GO:0003824,GO:0006082,GO:0006629,GO:0006720,GO:0006721,GO:0008150,GO:0008152,GO:0008300,GO:0009056,GO:0009314,GO:0009416,GO:0009628,GO:0009639,GO:0009685,GO:0009987,GO:0010817,GO:0016042,GO:0016054,GO:0016101,GO:0016103,GO:0016115,GO:0016491,GO:0016705,GO:0016706,GO:0019752,GO:0042445,GO:0042447,GO:0043436,GO:0044237,GO:0044238,GO:0044242,GO:0044248,GO:0044255,GO:0044281,GO:0044282,GO:…	1.14.11.13	ko:K04125	ko00904,ko01110,map00904,map01110	-	R03008,R03809,R06337,R06338	RC00478,RC00661	ko00000,ko00001,ko01000	-	-	-	2OG-FeII_Oxy,DIOX_N
file_1_file_1_jg4540.t1	71139.XP_010038302.1	1.65e-287	789	KOG2656@1|root,KOG2656@2759|Eukaryota,37I1V@33090|Viridiplantae,3GD7Y@35493|Streptophyta	35493|Streptophyta	K	DNA methyltransferase 1-associated protein	-	GO:0000122,GO:0000123,GO:0000228,GO:0000785,GO:0000790,GO:0000812,GO:0000981,GO:0001085,GO:0001103,GO:0003674,GO:0003700,GO:0003712,GO:0003714,GO:0005488,GO:0005515,GO:0005575,GO:0005622,GO:0005623,GO:0005634,GO:0005654,GO:0005694,GO:0005737,GO:0005829,GO:0006139,GO:0006259,GO:0006304,GO:0006305,GO:0006306,GO:0006325,GO:0006355,GO:0006357,GO:0006464,GO:0006473,GO:0006475,GO:0006725,GO:0006807,GO:…	-	ko:K11324	-	-	-	-	ko00000,ko03036	-	-	-	DMAP1,SANT_DAMP1_like
file_1_file_1_jg4541.t1	71139.XP_010038304.1	1.31e-139	400	28KBT@1|root,2QSSS@2759|Eukaryota,37J9Z@33090|Viridiplantae,3GB0S@35493|Streptophyta	35493|Streptophyta	-	-	-	-	-	-	-	-	-	-	-	-	-	-	INSIG
file_1_file_1_jg4542.t1	71139.XP_010039288.1	0	907	2CMR8@1|root,2QRJ7@2759|Eukaryota,37IDF@33090|Viridiplantae,3G8DA@35493|Streptophyta	35493|Streptophyta	I	glycerol-3-phosphate acyltransferase	-	GO:0003674,GO:0003824,GO:0005575,GO:0006793,GO:0006796,GO:0008150,GO:0008152,GO:0008374,GO:0009058,GO:0009059,GO:0009987,GO:0010143,GO:0016020,GO:0016311,GO:0016740,GO:0016746,GO:0016747,GO:0016787,GO:0016788,GO:0016791,GO:0042578,GO:0043170,GO:0044237,GO:0071704,GO:0090447,GO:1901576	2.3.1.15,2.3.1.198	ko:K13508	ko00561,ko00564,ko01100,ko01110,map00561,map00564,map01100,map01110	M00089	R00851,R06872,R09380	RC00004,RC00037,RC00039,RC00041	ko00000,ko00001,ko00002,ko01000,ko01004	-	-	-	Acyltransferase
file_1_file_1_jg4543.t1	71139.XP_010038301.1	0	1376	COG0696@1|root,KOG1914@2759|Eukaryota,37QPZ@33090|Viridiplantae,3GDGF@35493|Streptophyta	35493|Streptophyta	A	Cleavage stimulation factor subunit	-	GO:0000375,GO:0000377,GO:0000398,GO:0003674,GO:0003676,GO:0003723,GO:0003729,GO:0005488,GO:0005575,GO:0005622,GO:0005623,GO:0005634,GO:0005654,GO:0006139,GO:0006351,GO:0006353,GO:0006355,GO:0006366,GO:0006369,GO:0006378,GO:0006379,GO:0006396,GO:0006397,GO:0006725,GO:0006807,GO:0008150,GO:0008152,GO:0008380,GO:0009058,GO:0009059,GO:0009889,GO:0009890,GO:0009892,GO:0009987,GO:0010467,GO:0010468,GO:…	-	ko:K14408	ko03015,map03015	-	-	-	ko00000,ko00001,ko03019	-	-	-	Suf,TPR_14
file_1_file_1_jg4544.t1	71139.XP_010038300.1	7.94e-97	289	2C6RE@1|root,2S30Q@2759|Eukaryota,37V9B@33090|Viridiplantae,3GIGW@35493|Streptophyta	35493|Streptophyta	-	-	-	-	-	-	-	-	-	-	-	-	-	-	-
file_1_file_1_jg4546.t1	71139.XP_010038298.1	1.71e-249	713	29868@1|root,2RF6R@2759|Eukaryota,37QFW@33090|Viridiplantae,3GGVA@35493|Streptophyta	35493|Streptophyta	S	Zinc knuckle (CCHC-type) family protein	-	-	-	-	-	-	-	-	-	-	-	-	-
file_1_file_1_jg4547.t1	71139.XP_010038297.1	4.54e-307	857	2CC3R@1|root,2QTKB@2759|Eukaryota,37JEJ@33090|Viridiplantae,3G794@35493|Streptophyta	35493|Streptophyta	S	Stachyose	STS	GO:0003674,GO:0003824,GO:0006950,GO:0006979,GO:0008150,GO:0008378,GO:0009628,GO:0016740,GO:0016757,GO:0016758,GO:0047268,GO:0050896,GO:0080167	2.4.1.67	ko:K06611	ko00052,map00052	-	R03418	RC00049,RC00059	ko00000,ko00001,ko01000	-	-	-	Raffinose_syn
file_1_file_1_jg4548.t1	71139.XP_010038296.1	6.8e-252	692	2926D@1|root,2R92T@2759|Eukaryota,37JID@33090|Viridiplantae,3G8IN@35493|Streptophyta	35493|Streptophyta	S	Ethylbenzene dehydrogenase	-	-	-	-	-	-	-	-	-	-	-	-	EB_dh
file_1_file_1_jg4549.t1	71139.XP_010030184.1	8.56e-151	440	COG0151@1|root,KOG0237@2759|Eukaryota,37II8@33090|Viridiplantae,3GA1M@35493|Streptophyta	35493|Streptophyta	F	phosphoribosylamine--glycine ligase	-	GO:0005575,GO:0005622,GO:0005623,GO:0005737,GO:0009507,GO:0009532,GO:0009536,GO:0009570,GO:0043226,GO:0043227,GO:0043229,GO:0043231,GO:0044422,GO:0044424,GO:0044434,GO:0044435,GO:0044444,GO:0044446,GO:0044464	6.3.4.13	ko:K01945	ko00230,ko01100,ko01110,ko01130,map00230,map01100,map01110,map01130	M00048	R04144	RC00090,RC00166	ko00000,ko00001,ko00002,ko01000	-	-	-	GARS_A,GARS_C,GARS_N
file_1_file_1_jg4551.t1	71139.XP_010038295.1	0	1270	COG0515@1|root,KOG1187@2759|Eukaryota,37RZN@33090|Viridiplantae,3GA84@35493|Streptophyta	35493|Streptophyta	T	receptor-like serine threonine-protein kinase	-	GO:0000003,GO:0003006,GO:0003674,GO:0003824,GO:0004672,GO:0004674,GO:0004675,GO:0004888,GO:0005575,GO:0005623,GO:0005886,GO:0006464,GO:0006468,GO:0006793,GO:0006796,GO:0006807,GO:0007154,GO:0007165,GO:0007166,GO:0007167,GO:0007178,GO:0007275,GO:0008150,GO:0008152,GO:0009653,GO:0009790,GO:0009791,GO:0009793,GO:0009888,GO:0009987,GO:0010065,GO:0010068,GO:0010154,GO:0016020,GO:0016301,GO:0016310,GO:…	-	-	-	-	-	-	-	-	-	-	Pkinase,Pkinase_Tyr
file_1_file_1_jg4553.t1	71139.XP_010038291.1	0	934	2CMYS@1|root,2QSTQ@2759|Eukaryota,37PUT@33090|Viridiplantae,3G7SI@35493|Streptophyta	35493|Streptophyta	S	PAPA-1-like family protein zinc finger (HIT type) family protein	-	-	-	ko:K11666	-	-	-	-	ko00000,ko03036	-	-	-	PAPA-1,zf-HIT
file_1_file_1_jg4553.t2	71139.XP_010038291.1	0	941	2CMYS@1|root,2QSTQ@2759|Eukaryota,37PUT@33090|Viridiplantae,3G7SI@35493|Streptophyta	35493|Streptophyta	S	PAPA-1-like family protein zinc finger (HIT type) family protein	-	-	-	ko:K11666	-	-	-	-	ko00000,ko03036	-	-	-	PAPA-1,zf-HIT
file_1_file_1_jg4554.t1	71139.XP_010038290.1	3.71e-145	418	29AV9@1|root,2RHY4@2759|Eukaryota,37SF6@33090|Viridiplantae,3GEJJ@35493|Streptophyta	35493|Streptophyta	-	-	-	-	-	-	-	-	-	-	-	-	-	-	-
file_1_file_1_jg4555.t1	71139.XP_010038289.1	0	931	2CMHN@1|root,2QQD3@2759|Eukaryota,37P3P@33090|Viridiplantae,3GEV7@35493|Streptophyta	35493|Streptophyta	S	Protein trichome birefringence-like 6	-	GO:0003674,GO:0003824,GO:0005575,GO:0005622,GO:0005623,GO:0005737,GO:0005794,GO:0008150,GO:0008374,GO:0009987,GO:0012505,GO:0016407,GO:0016413,GO:0016740,GO:0016746,GO:0016747,GO:0043226,GO:0043227,GO:0043229,GO:0043231,GO:0044424,GO:0044444,GO:0044464,GO:0071554	-	-	-	-	-	-	-	-	-	-	PC-Esterase,PMR5N
file_1_file_1_jg4556.t1	71139.XP_010038288.1	3.81e-35	125	2E14P@1|root,2S8H1@2759|Eukaryota,37WUZ@33090|Viridiplantae,3GKXQ@35493|Streptophyta	35493|Streptophyta	S	Cytochrome c oxidase subunit	-	-	-	-	-	-	-	-	-	-	-	-	-
file_1_file_1_jg4557.t1	71139.XP_010038287.1	2.77e-65	201	2DAQB@1|root,2S5GB@2759|Eukaryota,37WHF@33090|Viridiplantae,3GKHB@35493|Streptophyta	35493|Streptophyta	S	Calvin cycle protein	-	-	-	-	-	-	-	-	-	-	-	-	CP12
file_1_file_1_jg4558.t1	71139.XP_010038286.1	7.49e-76	229	2CY2E@1|root,2S1GC@2759|Eukaryota,37VIA@33090|Viridiplantae,3GJBC@35493|Streptophyta	35493|Streptophyta	K	Ocs element-binding factor	-	GO:0003674,GO:0003676,GO:0003677,GO:0003700,GO:0005488,GO:0005515,GO:0005575,GO:0005622,GO:0005623,GO:0005634,GO:0006355,GO:0006950,GO:0006970,GO:0006971,GO:0007154,GO:0008150,GO:0009267,GO:0009605,GO:0009628,GO:0009889,GO:0009891,GO:0009893,GO:0009987,GO:0009991,GO:0010468,GO:0010556,GO:0010557,GO:0010604,GO:0010628,GO:0019219,GO:0019222,GO:0031323,GO:0031325,GO:0031326,GO:0031328,GO:0031667,GO:…	-	-	-	-	-	-	-	-	-	-	bZIP_1
file_1_file_1_jg4559.t1	71139.XP_010038285.1	2.71e-160	474	KOG4197@1|root,KOG4197@2759|Eukaryota,37RR5@33090|Viridiplantae,3GCVK@35493|Streptophyta	35493|Streptophyta	L	Pentatricopeptide repeat-containing protein	-	GO:0003674,GO:0003676,GO:0003723,GO:0003824,GO:0004518,GO:0004519,GO:0005488,GO:0005575,GO:0005622,GO:0005623,GO:0006139,GO:0006725,GO:0006807,GO:0008150,GO:0008152,GO:0009451,GO:0009987,GO:0016070,GO:0016787,GO:0016788,GO:0034641,GO:0043170,GO:0043226,GO:0043227,GO:0043229,GO:0043231,GO:0043412,GO:0044237,GO:0044238,GO:0044424,GO:0044464,GO:0046483,GO:0071704,GO:0090304,GO:0090305,GO:0097159,GO:…	-	-	-	-	-	-	-	-	-	-	PPR,PPR_2,PPR_3
file_1_file_1_jg4561.t1	71139.XP_010038284.1	0	2118	COG0249@1|root,KOG0217@2759|Eukaryota,37J1Q@33090|Viridiplantae,3GCN9@35493|Streptophyta	35493|Streptophyta	L	Component of the post-replicative DNA mismatch repair system (MMR)	-	GO:0000217,GO:0000404,GO:0003674,GO:0003676,GO:0003677,GO:0003684,GO:0003690,GO:0003824,GO:0005488,GO:0005575,GO:0005622,GO:0005623,GO:0006139,GO:0006259,GO:0006281,GO:0006290,GO:0006298,GO:0006725,GO:0006807,GO:0006950,GO:0006974,GO:0006996,GO:0008094,GO:0008150,GO:0008152,GO:0009987,GO:0016043,GO:0016462,GO:0016787,GO:0016817,GO:0016818,GO:0016887,GO:0017111,GO:0030983,GO:0032135,GO:0032300,GO:…	-	ko:K08737	ko01524,ko03430,ko05200,ko05210,map01524,map03430,map05200,map05210	M00295	-	-	ko00000,ko00001,ko00002,ko03400	-	-	-	MutS_I,MutS_II,MutS_III,MutS_IV,MutS_V
file_1_file_1_jg4562.t1	71139.XP_010069865.1	1.8e-136	386	KOG0077@1|root,KOG0077@2759|Eukaryota,37MJP@33090|Viridiplantae,3G7NN@35493|Streptophyta	35493|Streptophyta	U	Belongs to the small GTPase superfamily. SAR1 family	-	-	-	ko:K07953	ko04141,ko05134,map04141,map05134	M00404	-	-	ko00000,ko00001,ko00002,ko01000,ko04031,ko04131	-	-	-	Arf
file_1_file_1_jg4563.t1	71139.XP_010038280.1	2.74e-91	275	2AW1J@1|root,2S304@2759|Eukaryota,37VMU@33090|Viridiplantae,3GIX1@35493|Streptophyta	35493|Streptophyta	S	Multidrug resistance protein ABC transporter family protein	-	-	-	-	-	-	-	-	-	-	-	-	DUF4228
file_1_file_1_jg4565.t1	71139.XP_010038279.1	0	994	28HKM@1|root,2QPYD@2759|Eukaryota,37QQM@33090|Viridiplantae,3GGX2@35493|Streptophyta	35493|Streptophyta	O	DNAJ heat shock N-terminal domain-containing protein	-	-	-	-	-	-	-	-	-	-	-	-	-
file_1_file_1_jg4566.t1	71139.XP_010038278.1	0	1892	KOG1929@1|root,KOG1929@2759|Eukaryota,37IP5@33090|Viridiplantae,3GDFD@35493|Streptophyta	35493|Streptophyta	L	BRCT domain-containing protein	-	-	-	ko:K10728	ko03440,map03440	-	-	-	ko00000,ko00001,ko03032,ko03400	-	-	-	BRCT,PHD,PTCB-BRCT
file_1_file_1_jg4567.t1	71139.XP_010038275.1	9.53e-134	382	KOG2886@1|root,KOG2886@2759|Eukaryota,37JET@33090|Viridiplantae,3GF6U@35493|Streptophyta	35493|Streptophyta	S	Transmembrane protein 205	-	-	-	-	-	-	-	-	-	-	-	-	DUF4149
file_1_file_1_jg4568.t1	71139.XP_010038274.1	6.96e-240	660	COG0484@1|root,KOG0713@2759|Eukaryota,37IG8@33090|Viridiplantae,3G9SD@35493|Streptophyta	35493|Streptophyta	O	DnaJ homolog subfamily B member	-	GO:0002682,GO:0002684,GO:0005575,GO:0005622,GO:0005623,GO:0005737,GO:0005783,GO:0005788,GO:0005886,GO:0008150,GO:0009605,GO:0009607,GO:0012505,GO:0016020,GO:0031347,GO:0031349,GO:0031974,GO:0032991,GO:0034663,GO:0035821,GO:0043207,GO:0043226,GO:0043227,GO:0043229,GO:0043231,GO:0043233,GO:0044003,GO:0044403,GO:0044419,GO:0044422,GO:0044424,GO:0044432,GO:0044444,GO:0044446,GO:0044464,GO:0045088,GO:…	-	ko:K09517	ko04141,map04141	-	-	-	ko00000,ko00001,ko03110	-	-	-	DnaJ,DnaJ_C
file_1_file_1_jg4569.t1	71139.XP_010038272.1	7.5e-241	664	COG0526@1|root,KOG0191@2759|Eukaryota,37NZK@33090|Viridiplantae,3GGAI@35493|Streptophyta	35493|Streptophyta	O	Belongs to the protein disulfide isomerase family	-	GO:0000003,GO:0003006,GO:0003674,GO:0003756,GO:0003824,GO:0005575,GO:0005618,GO:0005622,GO:0005623,GO:0005737,GO:0005773,GO:0005774,GO:0005783,GO:0006457,GO:0006950,GO:0007275,GO:0008150,GO:0009505,GO:0009553,GO:0009566,GO:0009567,GO:0009790,GO:0009791,GO:0009793,GO:0009856,GO:0009987,GO:0010035,GO:0010038,GO:0010154,GO:0012505,GO:0016020,GO:0016853,GO:0016860,GO:0016864,GO:0019953,GO:0022414,GO:…	5.3.4.1	ko:K01829,ko:K09584	ko04141,map04141	-	-	-	ko00000,ko00001,ko01000,ko03110,ko04131	-	-	-	ERp29,Thioredoxin
file_1_file_1_jg4570.t1	71139.XP_010038271.1	5.03e-135	392	28PYR@1|root,2QWMC@2759|Eukaryota,37T55@33090|Viridiplantae,3G7Q5@35493|Streptophyta	35493|Streptophyta	S	BEST Arabidopsis thaliana protein match is 3'-5' exonuclease domain-containing protein K homology domain-containing protein KH domain-containing protein (TAIR AT2G25910.2)	-	-	-	-	-	-	-	-	-	-	-	-	-
file_1_file_2_29325_t	71139.XP_010038271.1	2.73e-149	425	28PYR@1|root,2QWMC@2759|Eukaryota,37T55@33090|Viridiplantae,3G7Q5@35493|Streptophyta	35493|Streptophyta	S	BEST Arabidopsis thaliana protein match is 3'-5' exonuclease domain-containing protein K homology domain-containing protein KH domain-containing protein (TAIR AT2G25910.2)	-	-	-	-	-	-	-	-	-	-	-	-	-
file_1_file_1_jg4570.t2	71139.XP_010038271.1	1.97e-31	118	28PYR@1|root,2QWMC@2759|Eukaryota,37T55@33090|Viridiplantae,3G7Q5@35493|Streptophyta	35493|Streptophyta	S	BEST Arabidopsis thaliana protein match is 3'-5' exonuclease domain-containing protein K homology domain-containing protein KH domain-containing protein (TAIR AT2G25910.2)	-	-	-	-	-	-	-	-	-	-	-	-	-
file_1_file_1_jg4571.t1	71139.XP_010038267.1	0	1196	COG0504@1|root,KOG2387@2759|Eukaryota,37IAM@33090|Viridiplantae,3GBDT@35493|Streptophyta	35493|Streptophyta	F	Catalyzes the ATP-dependent amination of UTP to CTP with either L-glutamine or ammonia as the source of nitrogen	-	-	6.3.4.2	ko:K01937	ko00240,ko01100,map00240,map01100	M00052	R00571,R00573	RC00010,RC00074	ko00000,ko00001,ko00002,ko01000	-	-	-	CTP_synth_N,GATase
file_1_file_1_jg4572.t1	71139.XP_010038265.1	7.66e-73	224	2B9IT@1|root,2S0U1@2759|Eukaryota,37UM6@33090|Viridiplantae,3GIZW@35493|Streptophyta	35493|Streptophyta	S	Long cell-linked locus protein	-	-	-	-	-	-	-	-	-	-	-	-	DUF761
file_1_file_1_jg4573.t1	71139.XP_010038264.1	1.69e-73	228	2E1R9@1|root,2S91E@2759|Eukaryota,37WV8@33090|Viridiplantae,3GKI6@35493|Streptophyta	35493|Streptophyta	S	Cotton fibre expressed protein	-	-	-	-	-	-	-	-	-	-	-	-	DUF761
file_1_file_2_29330_t	71139.XP_010038260.1	0	1397	28KA1@1|root,2QSQU@2759|Eukaryota,37SD9@33090|Viridiplantae,3G8AR@35493|Streptophyta	35493|Streptophyta	S	Protein FAR1-RELATED SEQUENCE 11-like	-	-	-	-	-	-	-	-	-	-	-	-	FAR1,MULE,SWIM
file_1_file_1_jg4574.t1	71139.XP_010038260.1	0	1387	28KA1@1|root,2QSQU@2759|Eukaryota,37SD9@33090|Viridiplantae,3G8AR@35493|Streptophyta	35493|Streptophyta	S	Protein FAR1-RELATED SEQUENCE 11-like	-	-	-	-	-	-	-	-	-	-	-	-	FAR1,MULE,SWIM
file_1_file_1_jg4575.t1	71139.XP_010039286.1	4.77e-306	841	COG4299@1|root,KOG4683@2759|Eukaryota,37PJ6@33090|Viridiplantae,3GDG2@35493|Streptophyta	35493|Streptophyta	T	Heparan-alpha-glucosaminide N-acetyltransferase-like	-	-	2.3.1.78	ko:K10532	ko00531,ko01100,ko04142,map00531,map01100,map04142	M00078	R07815	-	ko00000,ko00001,ko00002,ko01000	-	-	-	DUF1624
file_1_file_1_jg4576.t1	71139.XP_010038259.1	7.58e-243	672	28K1E@1|root,2QU85@2759|Eukaryota,37S1G@33090|Viridiplantae,3GBZE@35493|Streptophyta	35493|Streptophyta	-	-	-	-	-	-	-	-	-	-	-	-	-	-	MMR_HSR1
file_1_file_1_jg4577.t1	71139.XP_010058300.1	7.9e-114	329	2EHNT@1|root,2SN9T@2759|Eukaryota,37ZIG@33090|Viridiplantae	33090|Viridiplantae	S	Late embryogenesis abundant protein	-	-	-	-	-	-	-	-	-	-	-	-	LEA_2
file_1_file_1_jg4578.t1	71139.XP_010064825.1	1.52e-80	249	COG5068@1|root,KOG0014@2759|Eukaryota,37WBM@33090|Viridiplantae,3GK6I@35493|Streptophyta	35493|Streptophyta	K	Agamous-like MADS-box protein	-	GO:0000003,GO:0003006,GO:0003674,GO:0003700,GO:0005575,GO:0005622,GO:0005623,GO:0005634,GO:0006355,GO:0007275,GO:0008150,GO:0009790,GO:0009791,GO:0009793,GO:0009889,GO:0010154,GO:0010468,GO:0010556,GO:0019219,GO:0019222,GO:0022414,GO:0031323,GO:0031326,GO:0032501,GO:0032502,GO:0042995,GO:0043226,GO:0043227,GO:0043229,GO:0043231,GO:0044424,GO:0044464,GO:0048316,GO:0048608,GO:0048731,GO:0048856,GO:…	-	ko:K09260	ko04013,ko04022,ko04371,ko05418,map04013,map04022,map04371,map05418	-	-	-	ko00000,ko00001,ko03000	-	-	-	SRF-TF
file_1_file_1_jg4579.t1	71139.XP_010025346.1	1.28e-10	68.2	2CN1G@1|root,2QTA9@2759|Eukaryota,37R42@33090|Viridiplantae,3G797@35493|Streptophyta	35493|Streptophyta	S	expressed protein	-	-	-	-	-	-	-	-	-	-	-	-	-
file_1_file_1_jg4581.t1	71139.XP_010038255.1	4.08e-20	91.3	2BPF5@1|root,2S4V5@2759|Eukaryota,37WJA@33090|Viridiplantae,3GKFZ@35493|Streptophyta	35493|Streptophyta	S	leucine-rich repeat extensin-like protein	-	-	-	-	-	-	-	-	-	-	-	-	-
file_1_file_1_jg4582.t1	71139.XP_010038254.1	9.29e-72	219	2BS7P@1|root,2S1Y2@2759|Eukaryota,37VFR@33090|Viridiplantae,3GJQQ@35493|Streptophyta	35493|Streptophyta	-	-	-	-	-	-	-	-	-	-	-	-	-	-	-
file_1_file_1_jg4584.t1	71139.XP_010038253.1	1.62e-259	712	2BYJN@1|root,2QTN8@2759|Eukaryota,37Q0Y@33090|Viridiplantae,3G9T1@35493|Streptophyta	35493|Streptophyta	G	Belongs to the glycosyltransferase 8 family	-	GO:0000003,GO:0000271,GO:0003006,GO:0003674,GO:0003824,GO:0005575,GO:0005622,GO:0005623,GO:0005737,GO:0005783,GO:0005794,GO:0005975,GO:0005976,GO:0007275,GO:0008150,GO:0008152,GO:0008194,GO:0009058,GO:0009059,GO:0009664,GO:0009791,GO:0009832,GO:0009987,GO:0010154,GO:0010191,GO:0010192,GO:0010214,GO:0010393,GO:0012505,GO:0016043,GO:0016051,GO:0016740,GO:0016757,GO:0016758,GO:0017144,GO:0022414,GO:…	-	-	-	-	-	-	-	-	-	-	Glyco_transf_8
file_1_file_1_jg4585.t1	71139.XP_010039285.1	0	1202	28M02@1|root,2QUPM@2759|Eukaryota,37KCA@33090|Viridiplantae,3GD2X@35493|Streptophyta	35493|Streptophyta	S	cobra-like protein	-	-	-	-	-	-	-	-	-	-	-	-	COBRA
file_1_file_1_jg4586.t1	71139.XP_010038251.1	6.69e-196	558	2CN85@1|root,2QUFP@2759|Eukaryota,37K36@33090|Viridiplantae,3G8N6@35493|Streptophyta	35493|Streptophyta	S	Protein of unknown function (DUF789)	-	-	-	-	-	-	-	-	-	-	-	-	DUF789
file_1_file_1_jg4587.t1	71139.XP_010038248.1	0	946	COG0642@1|root,KOG0519@2759|Eukaryota,37I6R@33090|Viridiplantae,3G8U0@35493|Streptophyta	35493|Streptophyta	T	May act early in the ethylene signal transduction pathway, possibly as an ethylene receptor, or as a regulator of the pathway	ETR1	GO:0003674,GO:0003824,GO:0004672,GO:0004673,GO:0005488,GO:0005575,GO:0005622,GO:0005623,GO:0005737,GO:0005783,GO:0006464,GO:0006468,GO:0006793,GO:0006796,GO:0006807,GO:0008150,GO:0008152,GO:0009966,GO:0009968,GO:0009987,GO:0010104,GO:0010105,GO:0010646,GO:0010648,GO:0012505,GO:0016301,GO:0016310,GO:0016740,GO:0016772,GO:0016773,GO:0016775,GO:0018106,GO:0018193,GO:0018202,GO:0019538,GO:0023051,GO:…	-	ko:K14509	ko04016,ko04075,map04016,map04075	-	-	-	ko00000,ko00001,ko01000	-	-	-	GAF,HATPase_c,HisKA,Response_reg
file_1_file_1_jg4588.t1	71139.XP_010069890.1	7.35e-127	363	COG2147@1|root,KOG1696@2759|Eukaryota,37M2R@33090|Viridiplantae,3GC4Q@35493|Streptophyta	35493|Streptophyta	J	Belongs to the eukaryotic ribosomal protein eL19 family	-	-	-	ko:K02885	ko03010,map03010	M00177,M00179	-	-	br01610,ko00000,ko00001,ko00002,ko03011	-	-	-	Ribosomal_L19e
file_1_file_1_jg4589.t1	71139.XP_010038246.1	7.18e-62	196	2CY3T@1|root,2S1TD@2759|Eukaryota,37VEV@33090|Viridiplantae,3GJI3@35493|Streptophyta	35493|Streptophyta	S	Proline-rich protein	-	-	-	-	-	-	-	-	-	-	-	-	Pollen_Ole_e_I
file_1_file_1_jg4590.t1	71139.XP_010038244.1	5.88e-172	484	KOG1620@1|root,KOG1620@2759|Eukaryota,37QAD@33090|Viridiplantae,3GE4V@35493|Streptophyta	35493|Streptophyta	IKT	Inositol phosphate kinase with a broad substrate specificity	IPK2	GO:0000003,GO:0000823,GO:0000824,GO:0000902,GO:0000904,GO:0003006,GO:0003674,GO:0003824,GO:0005575,GO:0005622,GO:0005623,GO:0005634,GO:0005737,GO:0005829,GO:0005886,GO:0006066,GO:0006355,GO:0006793,GO:0006796,GO:0006935,GO:0007275,GO:0008150,GO:0008152,GO:0009058,GO:0009555,GO:0009605,GO:0009653,GO:0009790,GO:0009791,GO:0009793,GO:0009826,GO:0009846,GO:0009856,GO:0009860,GO:0009889,GO:0009932,GO:…	2.7.1.140,2.7.1.151	ko:K00915,ko:K11251	ko00562,ko01100,ko04070,ko04138,ko04217,ko05034,ko05322,map00562,map01100,map04070,map04138,map04217,map05034,map05322	M00132	R03478,R05800,R05801,R10065,R10953	RC00002,RC00078,RC01938	ko00000,ko00001,ko00002,ko01000,ko03036,ko04147	-	-	-	IPK
file_1_file_1_jg4591.t1	71139.XP_010038238.1	8e-25	107	COG0438@1|root,KOG0853@2759|Eukaryota,37Q3U@33090|Viridiplantae,3G9HW@35493|Streptophyta	35493|Streptophyta	M	Sucrose-cleaving enzyme that provides UDP-glucose and fructose for various metabolic pathways	SUS4	GO:0003674,GO:0003824,GO:0008194,GO:0016157,GO:0016740,GO:0016757,GO:0016758,GO:0035251,GO:0046527	2.4.1.13	ko:K00695	ko00500,ko01100,map00500,map01100	-	R00806	RC00005,RC00028,RC02748	ko00000,ko00001,ko01000,ko01003	-	GT4	-	Glycos_transf_1,Sucrose_synth
file_1_file_1_jg4592.t1	71139.XP_010038236.1	3.03e-91	272	2D92H@1|root,2S5CS@2759|Eukaryota,37WAW@33090|Viridiplantae,3GKKC@35493|Streptophyta	33090|Viridiplantae	S	inhibitor	-	GO:0005575,GO:0005576	-	-	-	-	-	-	-	-	-	-	PMEI
file_1_file_1_jg4593.t1	71139.XP_010039282.1	1.73e-93	283	KOG0800@1|root,KOG0800@2759|Eukaryota,37TD2@33090|Viridiplantae,3GHEI@35493|Streptophyta	35493|Streptophyta	O	RING-H2 finger protein	-	GO:0000209,GO:0003674,GO:0003824,GO:0004842,GO:0005575,GO:0005622,GO:0005623,GO:0005737,GO:0005768,GO:0005769,GO:0005798,GO:0005886,GO:0006464,GO:0006508,GO:0006511,GO:0006807,GO:0006950,GO:0006970,GO:0007275,GO:0008150,GO:0008152,GO:0009056,GO:0009057,GO:0009628,GO:0009987,GO:0010498,GO:0012505,GO:0016020,GO:0016567,GO:0016740,GO:0019538,GO:0019787,GO:0019941,GO:0022622,GO:0030100,GO:0030163,GO:…	2.3.2.27	ko:K16286	-	-	-	-	ko00000,ko01000,ko04121	-	-	-	zf-RING_2
file_1_file_1_jg4594.t1	71139.XP_010039296.1	4.63e-157	445	COG0596@1|root,KOG4178@2759|Eukaryota,37P84@33090|Viridiplantae,3G9C1@35493|Streptophyta	35493|Streptophyta	I	epoxide hydrolase	-	GO:0000287,GO:0001676,GO:0003008,GO:0003013,GO:0003018,GO:0003674,GO:0003824,GO:0004301,GO:0005102,GO:0005488,GO:0005515,GO:0005575,GO:0005622,GO:0005623,GO:0005737,GO:0005777,GO:0005782,GO:0005829,GO:0006082,GO:0006605,GO:0006625,GO:0006629,GO:0006631,GO:0006633,GO:0006690,GO:0006725,GO:0006793,GO:0006796,GO:0006805,GO:0006810,GO:0006873,GO:0006874,GO:0006875,GO:0006886,GO:0006950,GO:0006952,GO:…	-	-	-	-	-	-	-	-	-	-	Abhydrolase_1,Abhydrolase_6
file_1_file_1_jg4595.t1	71139.XP_010038234.1	3.77e-43	149	COG0596@1|root,KOG4178@2759|Eukaryota,37P84@33090|Viridiplantae,3G9C1@35493|Streptophyta	35493|Streptophyta	I	epoxide hydrolase	-	GO:0000287,GO:0001676,GO:0003008,GO:0003013,GO:0003018,GO:0003674,GO:0003824,GO:0004301,GO:0005102,GO:0005488,GO:0005515,GO:0005575,GO:0005622,GO:0005623,GO:0005737,GO:0005777,GO:0005782,GO:0005829,GO:0006082,GO:0006605,GO:0006625,GO:0006629,GO:0006631,GO:0006633,GO:0006690,GO:0006725,GO:0006793,GO:0006796,GO:0006805,GO:0006810,GO:0006873,GO:0006874,GO:0006875,GO:0006886,GO:0006950,GO:0006952,GO:…	-	-	-	-	-	-	-	-	-	-	Abhydrolase_1,Abhydrolase_6
file_1_file_1_jg4596.t1	71139.XP_010039280.1	3.29e-213	592	COG0596@1|root,KOG4178@2759|Eukaryota,37P84@33090|Viridiplantae,3G9C1@35493|Streptophyta	35493|Streptophyta	I	epoxide hydrolase	-	GO:0000287,GO:0001676,GO:0003008,GO:0003013,GO:0003018,GO:0003674,GO:0003824,GO:0004301,GO:0005102,GO:0005488,GO:0005515,GO:0005575,GO:0005622,GO:0005623,GO:0005737,GO:0005777,GO:0005782,GO:0005829,GO:0006082,GO:0006605,GO:0006625,GO:0006629,GO:0006631,GO:0006633,GO:0006690,GO:0006725,GO:0006793,GO:0006796,GO:0006805,GO:0006810,GO:0006873,GO:0006874,GO:0006875,GO:0006886,GO:0006950,GO:0006952,GO:…	-	-	-	-	-	-	-	-	-	-	Abhydrolase_1,Abhydrolase_6
file_1_file_1_jg4597.t1	71139.XP_010039280.1	2.31e-33	127	COG0596@1|root,KOG4178@2759|Eukaryota,37P84@33090|Viridiplantae,3G9C1@35493|Streptophyta	35493|Streptophyta	I	epoxide hydrolase	-	GO:0000287,GO:0001676,GO:0003008,GO:0003013,GO:0003018,GO:0003674,GO:0003824,GO:0004301,GO:0005102,GO:0005488,GO:0005515,GO:0005575,GO:0005622,GO:0005623,GO:0005737,GO:0005777,GO:0005782,GO:0005829,GO:0006082,GO:0006605,GO:0006625,GO:0006629,GO:0006631,GO:0006633,GO:0006690,GO:0006725,GO:0006793,GO:0006796,GO:0006805,GO:0006810,GO:0006873,GO:0006874,GO:0006875,GO:0006886,GO:0006950,GO:0006952,GO:…	-	-	-	-	-	-	-	-	-	-	Abhydrolase_1,Abhydrolase_6
file_1_file_1_jg4598.t1	71139.XP_010038230.1	1.35e-216	599	COG0596@1|root,KOG4178@2759|Eukaryota,37P84@33090|Viridiplantae,3G9C1@35493|Streptophyta	35493|Streptophyta	I	epoxide hydrolase	-	GO:0000287,GO:0001676,GO:0003008,GO:0003013,GO:0003018,GO:0003674,GO:0003824,GO:0004301,GO:0005102,GO:0005488,GO:0005515,GO:0005575,GO:0005622,GO:0005623,GO:0005737,GO:0005777,GO:0005782,GO:0005829,GO:0006082,GO:0006605,GO:0006625,GO:0006629,GO:0006631,GO:0006633,GO:0006690,GO:0006725,GO:0006793,GO:0006796,GO:0006805,GO:0006810,GO:0006873,GO:0006874,GO:0006875,GO:0006886,GO:0006950,GO:0006952,GO:…	-	-	-	-	-	-	-	-	-	-	Abhydrolase_1,Abhydrolase_6
file_1_file_1_jg4599.t1	71139.XP_010039278.1	5.28e-89	269	2AH5Z@1|root,2RZ1I@2759|Eukaryota,37UP4@33090|Viridiplantae,3GJ0Z@35493|Streptophyta	35493|Streptophyta	S	Protein of unknown function, DUF538	-	-	-	-	-	-	-	-	-	-	-	-	DUF538
file_1_file_1_jg4600.t1	71139.XP_010069902.1	2.72e-09	57	2CI1Y@1|root,2S70H@2759|Eukaryota,37WRX@33090|Viridiplantae,3GKY7@35493|Streptophyta	35493|Streptophyta	S	late embryogenesis abundant protein	-	GO:0000302,GO:0001101,GO:0002831,GO:0005575,GO:0005622,GO:0005623,GO:0005634,GO:0005737,GO:0005739,GO:0005829,GO:0006950,GO:0006970,GO:0006979,GO:0007154,GO:0007275,GO:0007568,GO:0008150,GO:0009266,GO:0009314,GO:0009409,GO:0009414,GO:0009415,GO:0009416,GO:0009605,GO:0009607,GO:0009611,GO:0009620,GO:0009625,GO:0009628,GO:0009636,GO:0009642,GO:0009646,GO:0009651,GO:0009719,GO:0009723,GO:0009725,GO:…	-	-	-	-	-	-	-	-	-	-	LEA_3
file_1_file_1_jg4601.t1	71139.XP_010038229.1	3.76e-160	450	KOG4206@1|root,KOG4206@2759|Eukaryota,37P0N@33090|Viridiplantae,3GEPH@35493|Streptophyta	35493|Streptophyta	A	U1 small nuclear ribonucleoprotein	-	GO:0000375,GO:0000377,GO:0000398,GO:0003674,GO:0003676,GO:0003723,GO:0005488,GO:0005515,GO:0005575,GO:0005622,GO:0005623,GO:0005634,GO:0005654,GO:0005681,GO:0005685,GO:0005730,GO:0005737,GO:0005829,GO:0006139,GO:0006396,GO:0006397,GO:0006725,GO:0006807,GO:0008150,GO:0008152,GO:0008380,GO:0009987,GO:0010467,GO:0016070,GO:0016071,GO:0017069,GO:0030532,GO:0030619,GO:0031974,GO:0031981,GO:0032991,GO:…	-	ko:K11091	ko03040,map03040	M00351	-	-	ko00000,ko00001,ko00002,ko03041	-	-	-	RRM_1
file_1_file_1_jg4602.t1	71139.XP_010038228.1	0	1423	COG5644@1|root,KOG2172@2759|Eukaryota,37I2R@33090|Viridiplantae,3GB7F@35493|Streptophyta	35493|Streptophyta	T	U3 small nucleolar RNA-associated protein	-	GO:0000154,GO:0000447,GO:0000460,GO:0000462,GO:0000466,GO:0000469,GO:0000472,GO:0000478,GO:0000479,GO:0000480,GO:0000966,GO:0000967,GO:0001510,GO:0005575,GO:0005622,GO:0005623,GO:0005634,GO:0005654,GO:0005730,GO:0006139,GO:0006364,GO:0006396,GO:0006725,GO:0006807,GO:0008150,GO:0008152,GO:0009451,GO:0009987,GO:0010467,GO:0016070,GO:0016072,GO:0022613,GO:0030490,GO:0030684,GO:0031167,GO:0031974,GO:…	-	ko:K14567	ko03008,map03008	-	-	-	ko00000,ko00001,ko03009	-	-	-	Utp14
file_1_file_1_jg4603.t1	71139.XP_010038227.1	0	1390	KOG2065@1|root,KOG2065@2759|Eukaryota,37KM1@33090|Viridiplantae,3GDCP@35493|Streptophyta	35493|Streptophyta	Z	Gamma-tubulin complex is necessary for microtubule nucleation at the centrosome	GCP4	GO:0000003,GO:0000226,GO:0000278,GO:0000280,GO:0000923,GO:0000930,GO:0003674,GO:0005198,GO:0005200,GO:0005488,GO:0005515,GO:0005575,GO:0005622,GO:0005623,GO:0005737,GO:0005815,GO:0005819,GO:0005856,GO:0005911,GO:0006996,GO:0007010,GO:0007017,GO:0007020,GO:0007049,GO:0007051,GO:0007052,GO:0008092,GO:0008150,GO:0009506,GO:0009605,GO:0009607,GO:0009624,GO:0009987,GO:0015630,GO:0015631,GO:0016043,GO:…	-	ko:K16571	-	-	-	-	ko00000,ko03036,ko04812	-	-	-	Spc97_Spc98
file_1_file_1_jg4604.t1	71139.XP_010038226.1	2.44e-306	844	KOG1306@1|root,KOG1306@2759|Eukaryota,37R6E@33090|Viridiplantae,3G91P@35493|Streptophyta	35493|Streptophyta	PT	Belongs to the Ca(2 ) cation antiporter (CaCA) (TC 2.A.19) family	MHX	GO:0000302,GO:0001666,GO:0002028,GO:0003008,GO:0003674,GO:0005215,GO:0005432,GO:0005488,GO:0005509,GO:0005575,GO:0005622,GO:0005623,GO:0005737,GO:0005739,GO:0005856,GO:0005874,GO:0005886,GO:0005887,GO:0005911,GO:0006810,GO:0006811,GO:0006812,GO:0006814,GO:0006816,GO:0006873,GO:0006874,GO:0006875,GO:0006937,GO:0006942,GO:0006950,GO:0006979,GO:0007154,GO:0007165,GO:0007204,GO:0007275,GO:0007399,GO:…	-	ko:K03452	-	-	-	-	ko00000,ko02000	2.A.19.6	-	-	Na_Ca_ex
file_1_file_1_jg4604.t2	71139.XP_010038226.1	5.28e-305	841	KOG1306@1|root,KOG1306@2759|Eukaryota,37R6E@33090|Viridiplantae,3G91P@35493|Streptophyta	35493|Streptophyta	PT	Belongs to the Ca(2 ) cation antiporter (CaCA) (TC 2.A.19) family	MHX	GO:0000302,GO:0001666,GO:0002028,GO:0003008,GO:0003674,GO:0005215,GO:0005432,GO:0005488,GO:0005509,GO:0005575,GO:0005622,GO:0005623,GO:0005737,GO:0005739,GO:0005856,GO:0005874,GO:0005886,GO:0005887,GO:0005911,GO:0006810,GO:0006811,GO:0006812,GO:0006814,GO:0006816,GO:0006873,GO:0006874,GO:0006875,GO:0006937,GO:0006942,GO:0006950,GO:0006979,GO:0007154,GO:0007165,GO:0007204,GO:0007275,GO:0007399,GO:…	-	ko:K03452	-	-	-	-	ko00000,ko02000	2.A.19.6	-	-	Na_Ca_ex
file_1_file_1_jg4605.t1	71139.XP_010038224.1	0	969	KOG4197@1|root,KOG4197@2759|Eukaryota,37NCA@33090|Viridiplantae,3GEE2@35493|Streptophyta	35493|Streptophyta	P	Pentatricopeptide repeat-containing protein	-	GO:0003674,GO:0003676,GO:0003723,GO:0003824,GO:0004518,GO:0004519,GO:0005488,GO:0005575,GO:0005622,GO:0005623,GO:0006139,GO:0006725,GO:0006807,GO:0008150,GO:0008152,GO:0009451,GO:0009987,GO:0016070,GO:0016787,GO:0016788,GO:0034641,GO:0043170,GO:0043226,GO:0043227,GO:0043229,GO:0043231,GO:0043412,GO:0044237,GO:0044238,GO:0044424,GO:0044464,GO:0046483,GO:0071704,GO:0090304,GO:0090305,GO:0097159,GO:…	-	ko:K03452	-	-	-	-	ko00000,ko02000	2.A.19.6	-	-	DYW_deaminase,PPR,PPR_2
file_1_file_1_jg4606.t1	71139.XP_010038217.1	1.66e-212	590	KOG2963@1|root,KOG2963@2759|Eukaryota,37R2S@33090|Viridiplantae,3GDS2@35493|Streptophyta	35493|Streptophyta	J	Peter Pan-like protein	-	GO:0000027,GO:0003674,GO:0003676,GO:0003723,GO:0005488,GO:0005575,GO:0006996,GO:0008150,GO:0009987,GO:0016043,GO:0019843,GO:0022607,GO:0022613,GO:0022618,GO:0030684,GO:0030687,GO:0032991,GO:0034622,GO:0042254,GO:0042255,GO:0042273,GO:0043933,GO:0044085,GO:0065003,GO:0070925,GO:0071826,GO:0071840,GO:0097159,GO:1901363,GO:1990904	-	ko:K14859	-	-	-	-	ko00000,ko03009	-	-	-	Brix
file_1_file_1_jg4607.t1	71139.XP_010038218.1	4.01e-152	432	2CMK4@1|root,2QQMQ@2759|Eukaryota,37RYA@33090|Viridiplantae,3GGBC@35493|Streptophyta	35493|Streptophyta	-	-	-	-	-	-	-	-	-	-	-	-	-	-	-
file_1_file_1_jg4608.t1	71139.XP_010038220.1	0	1742	COG1643@1|root,KOG0920@2759|Eukaryota,37K3V@33090|Viridiplantae,3GC4D@35493|Streptophyta	35493|Streptophyta	A	zinc finger CCCH domain-containing protein	-	GO:0003674,GO:0003676,GO:0003723,GO:0003724,GO:0003729,GO:0003824,GO:0004004,GO:0004386,GO:0005488,GO:0005575,GO:0005622,GO:0005623,GO:0005634,GO:0005730,GO:0005737,GO:0006139,GO:0006396,GO:0006725,GO:0006807,GO:0008026,GO:0008150,GO:0008152,GO:0008186,GO:0009507,GO:0009536,GO:0009987,GO:0010467,GO:0016070,GO:0016462,GO:0016787,GO:0016817,GO:0016818,GO:0016887,GO:0017111,GO:0031974,GO:0031981,GO:…	3.6.4.13	ko:K18995,ko:K20101	-	-	-	-	ko00000,ko01000,ko03012,ko03019	-	-	-	DEAD,Helicase_C,zf-CCCH
file_1_file_1_jg4609.t1	71139.XP_010038210.1	0	934	COG5259@1|root,KOG1279@2759|Eukaryota,37RQ0@33090|Viridiplantae,3G8XD@35493|Streptophyta	35493|Streptophyta	B	SWI SNF complex subunit	-	GO:0000228,GO:0000785,GO:0000790,GO:0005575,GO:0005622,GO:0005623,GO:0005634,GO:0005694,GO:0006325,GO:0006338,GO:0006996,GO:0008150,GO:0009987,GO:0016043,GO:0016514,GO:0031974,GO:0031981,GO:0032991,GO:0043226,GO:0043227,GO:0043228,GO:0043229,GO:0043231,GO:0043232,GO:0043233,GO:0044422,GO:0044424,GO:0044427,GO:0044428,GO:0044446,GO:0044454,GO:0044464,GO:0051276,GO:0070013,GO:0070603,GO:0071840,GO:…	-	ko:K11649	ko04714,ko05225,map04714,map05225	-	-	-	ko00000,ko00001,ko03021,ko03036	-	-	-	Myb_DNA-binding,SURF2,SWIRM,SWIRM-assoc_1
file_1_file_1_jg4609.t2	71139.XP_010038210.1	0	928	COG5259@1|root,KOG1279@2759|Eukaryota,37RQ0@33090|Viridiplantae,3G8XD@35493|Streptophyta	35493|Streptophyta	B	SWI SNF complex subunit	-	GO:0000228,GO:0000785,GO:0000790,GO:0005575,GO:0005622,GO:0005623,GO:0005634,GO:0005694,GO:0006325,GO:0006338,GO:0006996,GO:0008150,GO:0009987,GO:0016043,GO:0016514,GO:0031974,GO:0031981,GO:0032991,GO:0043226,GO:0043227,GO:0043228,GO:0043229,GO:0043231,GO:0043232,GO:0043233,GO:0044422,GO:0044424,GO:0044427,GO:0044428,GO:0044446,GO:0044454,GO:0044464,GO:0051276,GO:0070013,GO:0070603,GO:0071840,GO:…	-	ko:K11649	ko04714,ko05225,map04714,map05225	-	-	-	ko00000,ko00001,ko03021,ko03036	-	-	-	Myb_DNA-binding,SURF2,SWIRM,SWIRM-assoc_1
file_1_file_1_jg4610.t1	71139.XP_010039277.1	9.99e-49	166	COG0724@1|root,KOG0105@2759|Eukaryota,37QU8@33090|Viridiplantae,3GBN3@35493|Streptophyta	35493|Streptophyta	A	pre-mRNA-splicing factor	-	GO:0003674,GO:0003676,GO:0003723,GO:0003729,GO:0005488,GO:0005575,GO:0005622,GO:0005623,GO:0005634,GO:0005654,GO:0016604,GO:0016607,GO:0031974,GO:0031981,GO:0035061,GO:0043226,GO:0043227,GO:0043229,GO:0043231,GO:0043233,GO:0044422,GO:0044424,GO:0044428,GO:0044446,GO:0044451,GO:0044464,GO:0070013,GO:0097159,GO:1901363	-	ko:K12890	ko03040,ko04657,ko05168,map03040,map04657,map05168	-	-	-	ko00000,ko00001,ko03041	-	-	-	Ndufs5,RRM_1
file_1_file_1_jg4611.t1	71139.XP_010039277.1	5.87e-141	413	COG0724@1|root,KOG0105@2759|Eukaryota,37QU8@33090|Viridiplantae,3GBN3@35493|Streptophyta	35493|Streptophyta	A	pre-mRNA-splicing factor	-	GO:0003674,GO:0003676,GO:0003723,GO:0003729,GO:0005488,GO:0005575,GO:0005622,GO:0005623,GO:0005634,GO:0005654,GO:0016604,GO:0016607,GO:0031974,GO:0031981,GO:0035061,GO:0043226,GO:0043227,GO:0043229,GO:0043231,GO:0043233,GO:0044422,GO:0044424,GO:0044428,GO:0044446,GO:0044451,GO:0044464,GO:0070013,GO:0097159,GO:1901363	-	ko:K12890	ko03040,ko04657,ko05168,map03040,map04657,map05168	-	-	-	ko00000,ko00001,ko03041	-	-	-	Ndufs5,RRM_1
file_1_file_1_jg4612.t1	71139.XP_010034343.1	1.33e-19	92	KOG3029@1|root,KOG3029@2759|Eukaryota,37KV2@33090|Viridiplantae,3GD46@35493|Streptophyta	35493|Streptophyta	O	Prostaglandin E synthase	-	GO:0003674,GO:0003824,GO:0005488,GO:0016829,GO:0020037,GO:0033218,GO:0042277,GO:0043167,GO:0043168,GO:0043295,GO:0046906,GO:0048037,GO:0072341,GO:0097159,GO:1900750,GO:1901363,GO:1901681	5.3.99.3	ko:K05309	ko00590,ko01100,map00590,map01100	-	R02265	RC00672	ko00000,ko00001,ko01000	-	-	-	GST_C,GST_N_3,Glutaredoxin
file_1_file_1_jg4614.t1	71139.XP_010038208.1	1.11e-282	780	COG2723@1|root,KOG0626@2759|Eukaryota,37HZ7@33090|Viridiplantae,3GEM1@35493|Streptophyta	35493|Streptophyta	G	Belongs to the glycosyl hydrolase 1 family	BGLU5	GO:0003674,GO:0003824,GO:0004553,GO:0005575,GO:0005622,GO:0005623,GO:0005737,GO:0005773,GO:0005777,GO:0008150,GO:0008152,GO:0008422,GO:0009628,GO:0009812,GO:0015926,GO:0016787,GO:0016798,GO:0042440,GO:0042579,GO:0043226,GO:0043227,GO:0043229,GO:0043231,GO:0044424,GO:0044444,GO:0044464,GO:0046283,GO:0050896,GO:0071704,GO:0080167,GO:1901135,GO:1901657	3.2.1.21,3.5.2.17	ko:K01188,ko:K19964	ko00230,ko00460,ko00500,ko00940,ko01100,ko01110,ko01120,map00230,map00460,map00500,map00940,map01100,map01110,map01120	-	R00026,R02558,R02887,R02985,R03527,R04949,R04998,R06601,R10035,R10039,R10040	RC00049,RC00059,RC00171,RC00262,RC00397,RC00451,RC00714,RC00746,RC01248,RC03393	ko00000,ko00001,ko01000	-	GH1	-	Glyco_hydro_1
file_1_file_1_jg4615.t1	71139.XP_010038209.1	1.84e-100	293	COG0589@1|root,2RXKR@2759|Eukaryota,37TR9@33090|Viridiplantae,3GHVN@35493|Streptophyta	35493|Streptophyta	T	Universal stress protein	-	-	-	-	-	-	-	-	-	-	-	-	Usp
file_1_file_1_jg4616.t1	71139.XP_010038207.1	2.58e-108	312	COG0589@1|root,2RXKR@2759|Eukaryota,37TR9@33090|Viridiplantae,3GHVN@35493|Streptophyta	35493|Streptophyta	T	Universal stress protein	-	-	-	-	-	-	-	-	-	-	-	-	Usp
file_1_file_1_jg4617.t1	71139.XP_010039550.1	1.32e-61	198	28MAT@1|root,2QTU6@2759|Eukaryota,37J7E@33090|Viridiplantae,3G8DD@35493|Streptophyta	35493|Streptophyta	S	nicotianamine	-	-	2.5.1.43	ko:K05953	-	-	-	-	ko00000,ko01000	-	-	-	NAS
file_1_file_1_jg4618.t1	71139.XP_010039548.1	9.62e-251	696	COG0457@1|root,KOG4648@2759|Eukaryota,37PM2@33090|Viridiplantae,3GB2R@35493|Streptophyta	35493|Streptophyta	S	RNA polymerase II-associated protein	-	GO:0005575,GO:0005622,GO:0005623,GO:0005737,GO:0005829,GO:0032991,GO:0044424,GO:0044444,GO:0044464,GO:0097255	-	-	-	-	-	-	-	-	-	-	RPAP3_C,TPR_1,TPR_8
file_1_file_1_jg4619.t1	71139.XP_010038205.1	0	2628	COG1132@1|root,KOG0054@2759|Eukaryota,37KV9@33090|Viridiplantae,3GA2M@35493|Streptophyta	35493|Streptophyta	Q	ABC transporter C family member	-	GO:0000325,GO:0001101,GO:0003674,GO:0003824,GO:0005215,GO:0005575,GO:0005622,GO:0005623,GO:0005737,GO:0005773,GO:0005774,GO:0005794,GO:0005886,GO:0005911,GO:0006810,GO:0006855,GO:0006950,GO:0008150,GO:0009414,GO:0009415,GO:0009506,GO:0009605,GO:0009607,GO:0009611,GO:0009624,GO:0009628,GO:0009987,GO:0010035,GO:0010118,GO:0012505,GO:0015399,GO:0015405,GO:0015893,GO:0016020,GO:0016462,GO:0016787,GO:…	-	ko:K05665,ko:K05666	ko01523,ko01524,ko02010,ko04071,ko04976,ko04977,ko05206,map01523,map01524,map02010,map04071,map04976,map04977,map05206	-	-	-	ko00000,ko00001,ko02000	3.A.1.208.2,3.A.1.208.8	-	-	ABC_membrane,ABC_tran
file_1_file_2_29378_t	71139.XP_010038205.1	0	2554	COG1132@1|root,KOG0054@2759|Eukaryota,37KV9@33090|Viridiplantae,3GA2M@35493|Streptophyta	35493|Streptophyta	Q	ABC transporter C family member	-	GO:0000325,GO:0001101,GO:0003674,GO:0003824,GO:0005215,GO:0005575,GO:0005622,GO:0005623,GO:0005737,GO:0005773,GO:0005774,GO:0005794,GO:0005886,GO:0005911,GO:0006810,GO:0006855,GO:0006950,GO:0008150,GO:0009414,GO:0009415,GO:0009506,GO:0009605,GO:0009607,GO:0009611,GO:0009624,GO:0009628,GO:0009987,GO:0010035,GO:0010118,GO:0012505,GO:0015399,GO:0015405,GO:0015893,GO:0016020,GO:0016462,GO:0016787,GO:…	-	ko:K05665,ko:K05666	ko01523,ko01524,ko02010,ko04071,ko04976,ko04977,ko05206,map01523,map01524,map02010,map04071,map04976,map04977,map05206	-	-	-	ko00000,ko00001,ko02000	3.A.1.208.2,3.A.1.208.8	-	-	ABC_membrane,ABC_tran
file_1_file_1_jg4621.t1	71139.XP_010038204.1	4.79e-97	288	KOG3158@1|root,KOG3158@2759|Eukaryota,37JDD@33090|Viridiplantae,3GE8A@35493|Streptophyta	35493|Streptophyta	O	negative regulation of cytokinin-activated signaling pathway	-	GO:0005575,GO:0005622,GO:0005623,GO:0005634,GO:0005737,GO:0005829,GO:0005886,GO:0005911,GO:0007275,GO:0008150,GO:0009506,GO:0009888,GO:0009893,GO:0009966,GO:0009968,GO:0010449,GO:0010468,GO:0010604,GO:0010628,GO:0010646,GO:0010648,GO:0010817,GO:0016020,GO:0019222,GO:0022622,GO:0023051,GO:0023057,GO:0030054,GO:0032501,GO:0032502,GO:0032879,GO:0035266,GO:0040007,GO:0043226,GO:0043227,GO:0043229,GO:…	5.3.99.3	ko:K15730	ko00590,ko01100,map00590,map01100	-	R02265	RC00672	ko00000,ko00001,ko01000	-	-	-	CS
file_1_file_1_jg4622.t1	71139.XP_010038203.1	9.01e-179	502	COG5074@1|root,KOG0810@2759|Eukaryota,37IR0@33090|Viridiplantae,3G8J1@35493|Streptophyta	35493|Streptophyta	U	Belongs to the syntaxin family	-	GO:0000149,GO:0003674,GO:0005488,GO:0005515,GO:0005575,GO:0005622,GO:0005623,GO:0005737,GO:0005886,GO:0005911,GO:0006810,GO:0006887,GO:0006906,GO:0006996,GO:0008150,GO:0009504,GO:0009506,GO:0009524,GO:0009987,GO:0012505,GO:0016020,GO:0016021,GO:0016043,GO:0016050,GO:0016192,GO:0022406,GO:0030054,GO:0031201,GO:0031224,GO:0032940,GO:0032991,GO:0044424,GO:0044425,GO:0044444,GO:0044464,GO:0046903,GO:…	-	ko:K08486	ko04130,ko04721,map04130,map04721	-	-	-	ko00000,ko00001,ko04131,ko04147	-	-	-	SNARE,Syntaxin
file_1_file_1_jg4623.t1	71139.XP_010038201.1	1.89e-248	686	KOG1188@1|root,KOG1188@2759|Eukaryota,37IAN@33090|Viridiplantae,3GFP0@35493|Streptophyta	35493|Streptophyta	S	WD repeat-containing protein 89 homolog	-	GO:0008150,GO:0010029,GO:0040008,GO:0048580,GO:0050789,GO:0050793,GO:0051239,GO:0065007,GO:1900140,GO:2000026	-	-	-	-	-	-	-	-	-	-	WD40
file_1_file_1_jg4624.t1	71139.XP_010038199.1	2.02e-55	176	KOG3293@1|root,KOG3293@2759|Eukaryota,37TQ9@33090|Viridiplantae,3GI7G@35493|Streptophyta	35493|Streptophyta	A	U6 snRNA-associated Sm-like protein	-	GO:0000245,GO:0000375,GO:0000377,GO:0000387,GO:0000398,GO:0000932,GO:0000956,GO:0003674,GO:0003676,GO:0003723,GO:0005488,GO:0005575,GO:0005622,GO:0005623,GO:0005634,GO:0005688,GO:0005737,GO:0006139,GO:0006396,GO:0006397,GO:0006401,GO:0006402,GO:0006725,GO:0006807,GO:0006996,GO:0008150,GO:0008152,GO:0008380,GO:0009056,GO:0009057,GO:0009892,GO:0009987,GO:0010467,GO:0010468,GO:0010605,GO:0010629,GO:…	-	ko:K12623	ko03018,ko03040,map03018,map03040	M00354,M00396,M00397	-	-	ko00000,ko00001,ko00002,ko03019,ko03041	-	-	-	LSM
file_1_file_1_jg4625.t1	71139.XP_010038198.1	0	1395	COG0323@1|root,KOG1978@2759|Eukaryota,37KRE@33090|Viridiplantae,3GCMU@35493|Streptophyta	35493|Streptophyta	L	DNA mismatch repair protein	-	GO:0000003,GO:0002200,GO:0002376,GO:0002377,GO:0002440,GO:0002520,GO:0002566,GO:0003006,GO:0003674,GO:0003676,GO:0003677,GO:0003690,GO:0003697,GO:0003824,GO:0004518,GO:0004519,GO:0005488,GO:0005575,GO:0005622,GO:0005623,GO:0005634,GO:0005654,GO:0005737,GO:0005829,GO:0005856,GO:0005886,GO:0006139,GO:0006259,GO:0006281,GO:0006298,GO:0006310,GO:0006725,GO:0006807,GO:0006950,GO:0006974,GO:0007275,GO:…	-	ko:K10858	ko03430,ko03460,map03430,map03460	M00295	-	-	ko00000,ko00001,ko00002,ko03400	-	-	-	DNA_mis_repair,HATPase_c_3,MutL_C
file_1_file_1_jg4626.t1	71139.XP_010038197.1	1.99e-123	356	2C8GV@1|root,2QUI7@2759|Eukaryota,37JRV@33090|Viridiplantae,3G77S@35493|Streptophyta	35493|Streptophyta	S	REF SRPP-like protein	-	GO:0005575,GO:0005622,GO:0005623,GO:0005811,GO:0006996,GO:0008150,GO:0009987,GO:0016043,GO:0032502,GO:0034389,GO:0040007,GO:0040008,GO:0043226,GO:0043228,GO:0043229,GO:0043232,GO:0044424,GO:0044464,GO:0045927,GO:0048518,GO:0048583,GO:0048584,GO:0048589,GO:0050789,GO:0065007,GO:0071840,GO:0080134,GO:0080186,GO:1902584,GO:2000070	-	-	-	-	-	-	-	-	-	-	REF
file_1_file_1_jg4628.t1	71139.XP_010038196.1	1.9e-46	153	2BQ63@1|root,2S1TF@2759|Eukaryota,37WA4@33090|Viridiplantae,3GK5X@35493|Streptophyta	35493|Streptophyta	S	rapid alkalinization	-	-	-	-	-	-	-	-	-	-	-	-	RALF
file_1_file_1_jg4629.t1	71139.XP_010038195.1	0	1064	28KFB@1|root,2QSWB@2759|Eukaryota,37SW4@33090|Viridiplantae,3GXBN@35493|Streptophyta	35493|Streptophyta	S	Indole-3-acetic acid-amido synthetase	-	GO:0008150,GO:0009314,GO:0009416,GO:0009628,GO:0009719,GO:0009725,GO:0009733,GO:0010033,GO:0042221,GO:0050896	-	ko:K14487	ko04075,map04075	-	-	-	ko00000,ko00001	-	-	-	GH3
file_1_file_1_jg4630.t1	71139.XP_010038193.1	1.2e-259	717	COG1092@1|root,2QS1I@2759|Eukaryota,37IID@33090|Viridiplantae,3GD8A@35493|Streptophyta	35493|Streptophyta	J	Ribosomal RNA large subunit methyltransferase	-	-	-	-	-	-	-	-	-	-	-	-	Methyltrans_SAM
file_1_file_1_jg4630.t2	71139.XP_010038193.1	5.48e-266	734	COG1092@1|root,2QS1I@2759|Eukaryota,37IID@33090|Viridiplantae,3GD8A@35493|Streptophyta	35493|Streptophyta	J	Ribosomal RNA large subunit methyltransferase	-	-	-	-	-	-	-	-	-	-	-	-	Methyltrans_SAM
file_1_file_1_jg4631.t1	71139.XP_010039275.1	4.74e-193	538	2CMPR@1|root,2QR8B@2759|Eukaryota,37II1@33090|Viridiplantae,3G7KN@35493|Streptophyta	35493|Streptophyta	S	Desiccation-related protein PCC13-62-like	-	-	-	-	-	-	-	-	-	-	-	-	Ferritin_2
file_1_file_1_jg4632.t1	71139.XP_010039275.1	8.94e-198	550	2CMPR@1|root,2QR8B@2759|Eukaryota,37II1@33090|Viridiplantae,3G7KN@35493|Streptophyta	35493|Streptophyta	S	Desiccation-related protein PCC13-62-like	-	-	-	-	-	-	-	-	-	-	-	-	Ferritin_2
file_1_file_1_jg4633.t1	71139.XP_010039275.1	3.67e-53	186	2CMPR@1|root,2QR8B@2759|Eukaryota,37II1@33090|Viridiplantae,3G7KN@35493|Streptophyta	35493|Streptophyta	S	Desiccation-related protein PCC13-62-like	-	-	-	-	-	-	-	-	-	-	-	-	Ferritin_2
file_1_file_1_jg4634.t1	71139.XP_010039275.1	2.29e-74	232	2CMPR@1|root,2QR8B@2759|Eukaryota,37II1@33090|Viridiplantae,3G7KN@35493|Streptophyta	35493|Streptophyta	S	Desiccation-related protein PCC13-62-like	-	-	-	-	-	-	-	-	-	-	-	-	Ferritin_2
file_1_file_1_jg4635.t1	71139.XP_010038191.1	8.51e-199	558	COG0190@1|root,KOG0089@2759|Eukaryota,37K6Z@33090|Viridiplantae,3GCGD@35493|Streptophyta	35493|Streptophyta	H	Bifunctional protein FolD	-	GO:0003674,GO:0003824,GO:0004477,GO:0004488,GO:0005575,GO:0005622,GO:0005623,GO:0005737,GO:0005829,GO:0006082,GO:0006575,GO:0006725,GO:0006730,GO:0006732,GO:0006760,GO:0006807,GO:0008150,GO:0008152,GO:0009507,GO:0009536,GO:0009987,GO:0016491,GO:0016645,GO:0016646,GO:0016787,GO:0016810,GO:0016814,GO:0019219,GO:0019222,GO:0019238,GO:0019752,GO:0031323,GO:0034641,GO:0042558,GO:0043226,GO:0043227,GO:…	-	-	-	-	-	-	-	-	-	-	THF_DHG_CYH,THF_DHG_CYH_C
file_1_file_1_jg4637.t1	981085.XP_010090804.1	8.02e-18	77.4	2CR0N@1|root,2R6FH@2759|Eukaryota,38759@33090|Viridiplantae,3GV4G@35493|Streptophyta,4JR6I@91835|fabids	35493|Streptophyta	-	-	-	-	-	-	-	-	-	-	-	-	-	-	-
file_1_file_1_jg4638.t1	71139.XP_010038190.1	2.08e-99	298	KOG1603@1|root,KOG1603@2759|Eukaryota,37UTP@33090|Viridiplantae,3GIR8@35493|Streptophyta	35493|Streptophyta	P	Heavy-metal-associated domain	-	-	-	-	-	-	-	-	-	-	-	-	HMA
file_1_file_1_jg4639.t1	71139.XP_010038187.1	8.98e-123	355	COG0237@1|root,KOG3220@2759|Eukaryota,37RNA@33090|Viridiplantae,3G96N@35493|Streptophyta	35493|Streptophyta	H	dephospho-CoA kinase	-	GO:0003674,GO:0003824,GO:0004140,GO:0005575,GO:0005622,GO:0005623,GO:0005737,GO:0005773,GO:0005777,GO:0006139,GO:0006163,GO:0006164,GO:0006725,GO:0006732,GO:0006753,GO:0006793,GO:0006796,GO:0006807,GO:0008150,GO:0008152,GO:0009058,GO:0009108,GO:0009117,GO:0009150,GO:0009152,GO:0009165,GO:0009259,GO:0009260,GO:0009507,GO:0009536,GO:0009987,GO:0015936,GO:0015937,GO:0016301,GO:0016310,GO:0016740,GO:…	2.7.1.24	ko:K00859	ko00770,ko01100,map00770,map01100	M00120	R00130	RC00002,RC00078	ko00000,ko00001,ko00002,ko01000	-	-	-	CoaE
file_1_file_2_29398_t	71139.XP_010038187.1	5.53e-147	416	COG0237@1|root,KOG3220@2759|Eukaryota,37RNA@33090|Viridiplantae,3G96N@35493|Streptophyta	35493|Streptophyta	H	dephospho-CoA kinase	-	GO:0003674,GO:0003824,GO:0004140,GO:0005575,GO:0005622,GO:0005623,GO:0005737,GO:0005773,GO:0005777,GO:0006139,GO:0006163,GO:0006164,GO:0006725,GO:0006732,GO:0006753,GO:0006793,GO:0006796,GO:0006807,GO:0008150,GO:0008152,GO:0009058,GO:0009108,GO:0009117,GO:0009150,GO:0009152,GO:0009165,GO:0009259,GO:0009260,GO:0009507,GO:0009536,GO:0009987,GO:0015936,GO:0015937,GO:0016301,GO:0016310,GO:0016740,GO:…	2.7.1.24	ko:K00859	ko00770,ko01100,map00770,map01100	M00120	R00130	RC00002,RC00078	ko00000,ko00001,ko00002,ko01000	-	-	-	CoaE
file_1_file_1_jg4641.t1	71139.XP_010038186.1	1.6e-136	388	COG0625@1|root,KOG0867@2759|Eukaryota,37N5S@33090|Viridiplantae,3GDH8@35493|Streptophyta	35493|Streptophyta	O	Belongs to the GST superfamily	-	GO:0003674,GO:0003824,GO:0004364,GO:0005488,GO:0005515,GO:0005575,GO:0005622,GO:0005623,GO:0005737,GO:0006518,GO:0006575,GO:0006749,GO:0006790,GO:0006807,GO:0006950,GO:0008150,GO:0008152,GO:0009056,GO:0009404,GO:0009407,GO:0009635,GO:0009636,GO:0009987,GO:0016740,GO:0016765,GO:0019748,GO:0032991,GO:0034641,GO:0042221,GO:0042802,GO:0042803,GO:0043603,GO:0044237,GO:0044248,GO:0044424,GO:0044464,GO:…	2.5.1.18	ko:K00799	ko00480,ko00980,ko00982,ko00983,ko01524,ko05200,ko05204,ko05225,ko05418,map00480,map00980,map00982,map00983,map01524,map05200,map05204,map05225,map05418	-	R03522,R07002,R07003,R07004,R07023,R07024,R07025,R07026,R07069,R07070,R07083,R07084,R07091,R07092,R07093,R07094,R07100,R07113,R07116,R08280,R09409,R11905	RC00004,RC00069,RC00840,RC00948,RC01704,RC01705,RC01706,RC01758,RC01759,RC01765,RC01767,RC01769,RC02243,RC02527,RC02939,RC02940,RC02942,RC02943,RC02944	ko00000,ko00001,ko01000,ko02000	1.A.12.2.2,1.A.12.3.2	-	-	GST_C,GST_N
file_1_file_1_jg4642.t1	71139.XP_010038185.1	1.09e-268	740	KOG2111@1|root,KOG2111@2759|Eukaryota,37QUP@33090|Viridiplantae,3GCWW@35493|Streptophyta	35493|Streptophyta	J	Autophagy-related protein	-	GO:0000045,GO:0000407,GO:0000422,GO:0001101,GO:0003674,GO:0005488,GO:0005543,GO:0005575,GO:0005622,GO:0005623,GO:0005634,GO:0005737,GO:0005829,GO:0006464,GO:0006497,GO:0006807,GO:0006914,GO:0006950,GO:0006952,GO:0006970,GO:0006979,GO:0006996,GO:0007005,GO:0007033,GO:0007275,GO:0007568,GO:0008104,GO:0008150,GO:0008152,GO:0008289,GO:0009056,GO:0009058,GO:0009059,GO:0009414,GO:0009415,GO:0009605,GO:…	-	-	-	-	-	-	-	-	-	-	WD40
file_1_file_1_jg4643.t1	71139.XP_010038183.1	9.86e-263	731	2C1XZ@1|root,2RYMT@2759|Eukaryota,37TZ3@33090|Viridiplantae,3GH97@35493|Streptophyta	35493|Streptophyta	-	-	-	-	-	-	-	-	-	-	-	-	-	-	-
file_1_file_1_jg4645.t1	71139.XP_010058023.1	4.07e-42	144	COG0537@1|root,KOG3275@2759|Eukaryota,37TS8@33090|Viridiplantae,3GI8C@35493|Streptophyta	35493|Streptophyta	T	14 kDa zinc-binding	-	-	-	ko:K02503	-	-	-	-	ko00000,ko04147	-	-	-	HIT
file_1_file_1_jg4646.t1	3649.evm.model.supercontig_1.116	1.28e-20	94.7	KOG1441@1|root,KOG1441@2759|Eukaryota,37KSC@33090|Viridiplantae,3GFZ2@35493|Streptophyta,3HSAR@3699|Brassicales	35493|Streptophyta	EG	Triose phosphate phosphate translocator	-	GO:0003674,GO:0005215,GO:0005342,GO:0005575,GO:0005622,GO:0005623,GO:0005737,GO:0006810,GO:0006811,GO:0006820,GO:0008028,GO:0008150,GO:0008509,GO:0008514,GO:0008643,GO:0009314,GO:0009416,GO:0009507,GO:0009526,GO:0009536,GO:0009628,GO:0009642,GO:0009643,GO:0009941,GO:0015075,GO:0015120,GO:0015144,GO:0015318,GO:0015605,GO:0015711,GO:0015713,GO:0015717,GO:0015718,GO:0015748,GO:0015849,GO:0016020,GO:…	-	ko:K15283	-	-	-	-	ko00000,ko02000	2.A.7.9	-	-	TPT
file_1_file_1_jg4648.t1	71139.XP_010038182.1	0	973	28IIN@1|root,2QQVN@2759|Eukaryota,37KSV@33090|Viridiplantae,3GC1H@35493|Streptophyta	35493|Streptophyta	S	BEST Arabidopsis thaliana protein match is	-	-	-	-	-	-	-	-	-	-	-	-	-
file_1_file_1_jg4650.t1	71139.XP_010038180.1	3.4e-297	818	COG0053@1|root,KOG1485@2759|Eukaryota,37INU@33090|Viridiplantae,3GEA9@35493|Streptophyta	35493|Streptophyta	P	metal tolerance protein	-	-	-	-	-	-	-	-	-	-	-	-	Cation_efflux,ZT_dimer
file_1_file_1_jg4650.t2	71139.XP_010038180.1	3.61e-81	256	COG0053@1|root,KOG1485@2759|Eukaryota,37INU@33090|Viridiplantae,3GEA9@35493|Streptophyta	35493|Streptophyta	P	metal tolerance protein	-	-	-	-	-	-	-	-	-	-	-	-	Cation_efflux,ZT_dimer
file_1_file_1_jg4651.t1	71139.XP_010038178.1	0	2572	2CZZ0@1|root,2SC6K@2759|Eukaryota,388WQ@33090|Viridiplantae,3GXNY@35493|Streptophyta	35493|Streptophyta	S	CW-type Zinc Finger	-	-	-	-	-	-	-	-	-	-	-	-	zf-CW
file_1_file_1_jg4651.t2	71139.XP_010038178.1	0	2552	2CZZ0@1|root,2SC6K@2759|Eukaryota,388WQ@33090|Viridiplantae,3GXNY@35493|Streptophyta	35493|Streptophyta	S	CW-type Zinc Finger	-	-	-	-	-	-	-	-	-	-	-	-	zf-CW
file_1_file_2_29411_t	71139.XP_010038176.1	0	1303	COG1331@1|root,KOG2244@2759|Eukaryota,37MEB@33090|Viridiplantae,3GDX8@35493|Streptophyta	35493|Streptophyta	O	Spermatogenesis-associated protein	-	-	2.7.4.9	ko:K00943	ko00240,ko01100,map00240,map01100	M00053	R02094,R02098	RC00002	ko00000,ko00001,ko00002,ko01000	-	-	-	Thioredox_DsbH
file_1_file_1_jg4652.t1	71139.XP_010038176.1	0	1303	COG1331@1|root,KOG2244@2759|Eukaryota,37MEB@33090|Viridiplantae,3GDX8@35493|Streptophyta	35493|Streptophyta	O	Spermatogenesis-associated protein	-	-	2.7.4.9	ko:K00943	ko00240,ko01100,map00240,map01100	M00053	R02094,R02098	RC00002	ko00000,ko00001,ko00002,ko01000	-	-	-	Thioredox_DsbH
file_1_file_1_jg4653.t1	71139.XP_010038174.1	0	1142	28JZJ@1|root,2QSDZ@2759|Eukaryota,37PKC@33090|Viridiplantae,3G9G3@35493|Streptophyta	35493|Streptophyta	S	Belongs to the NPH3 family	-	-	-	-	-	-	-	-	-	-	-	-	BTB,NPH3
file_1_file_2_29414_t	71139.XP_010038173.1	2.24e-195	546	COG5539@1|root,KOG2606@2759|Eukaryota,37MPU@33090|Viridiplantae,3GDHZ@35493|Streptophyta	35493|Streptophyta	OT	OTU domain-containing protein	-	-	3.4.19.12	ko:K18342	-	-	-	-	ko00000,ko01000,ko04121	-	-	-	OTU
file_1_file_1_jg4654.t1	71139.XP_010038173.1	6.69e-195	546	COG5539@1|root,KOG2606@2759|Eukaryota,37MPU@33090|Viridiplantae,3GDHZ@35493|Streptophyta	35493|Streptophyta	OT	OTU domain-containing protein	-	-	3.4.19.12	ko:K18342	-	-	-	-	ko00000,ko01000,ko04121	-	-	-	OTU
file_1_file_1_jg4655.t1	102107.XP_008235078.1	4.48e-42	152	28UXK@1|root,2R1NP@2759|Eukaryota,383CN@33090|Viridiplantae,3GPQX@35493|Streptophyta	35493|Streptophyta	-	-	-	-	-	-	-	-	-	-	-	-	-	-	-
file_1_file_1_jg4656.t1	71139.XP_010029695.1	1.15e-272	756	2CMZ8@1|root,2QSW7@2759|Eukaryota,37R4K@33090|Viridiplantae,3GFJJ@35493|Streptophyta	35493|Streptophyta	K	SANT SWI3, ADA2, N-CoR and TFIIIB'' DNA-binding domains	-	-	-	ko:K11111	-	M00424	-	-	ko00000,ko00002,ko03032	-	-	-	DAO,Myb_DNA-binding
file_1_file_1_jg4657.t1	102107.XP_008241301.1	1.37e-181	521	COG2124@1|root,KOG0157@2759|Eukaryota,37THZ@33090|Viridiplantae,3GG11@35493|Streptophyta,4JSSH@91835|fabids	35493|Streptophyta	IQ	Belongs to the cytochrome P450 family	-	-	-	-	-	-	-	-	-	-	-	-	p450
file_1_file_1_jg4658.t1	71139.XP_010038172.1	1.23e-63	194	COG0695@1|root,KOG1752@2759|Eukaryota,37V7R@33090|Viridiplantae,3GJM2@35493|Streptophyta	35493|Streptophyta	O	Monothiol	-	-	-	ko:K03676	-	-	-	-	ko00000,ko03110	-	-	-	Glutaredoxin
file_1_file_1_jg4659.t1	71139.XP_010038171.1	6.72e-63	193	COG0695@1|root,KOG1752@2759|Eukaryota,37VJF@33090|Viridiplantae,3GJRD@35493|Streptophyta	35493|Streptophyta	O	glutaredoxin family	-	GO:0005575,GO:0005622,GO:0005623,GO:0005634,GO:0005737,GO:0006950,GO:0006995,GO:0007154,GO:0008150,GO:0009267,GO:0009605,GO:0009987,GO:0009991,GO:0031667,GO:0031668,GO:0031669,GO:0033554,GO:0042594,GO:0043226,GO:0043227,GO:0043229,GO:0043231,GO:0043562,GO:0044424,GO:0044464,GO:0050896,GO:0051716,GO:0071496	-	ko:K03676	-	-	-	-	ko00000,ko03110	-	-	-	Glutaredoxin
file_1_file_2_29421_t	71139.XP_010038170.1	5.61e-296	815	KOG1947@1|root,KOG1947@2759|Eukaryota,37KBY@33090|Viridiplantae,3G9QD@35493|Streptophyta	35493|Streptophyta	L	transport inhibitor response	TIR1	GO:0000003,GO:0000151,GO:0000822,GO:0003006,GO:0003674,GO:0003824,GO:0004842,GO:0005488,GO:0005575,GO:0005622,GO:0005623,GO:0005634,GO:0006355,GO:0006464,GO:0006807,GO:0006950,GO:0007154,GO:0007165,GO:0007275,GO:0007584,GO:0008144,GO:0008150,GO:0008152,GO:0009267,GO:0009555,GO:0009605,GO:0009653,GO:0009719,GO:0009725,GO:0009733,GO:0009734,GO:0009755,GO:0009791,GO:0009889,GO:0009890,GO:0009892,GO:…	-	ko:K14485	ko04075,map04075	-	-	-	ko00000,ko00001,ko04121	-	-	-	F-box,F-box-like,LRR_6
file_1_file_1_jg4661.t1	71139.XP_010038170.1	0	1102	KOG1947@1|root,KOG1947@2759|Eukaryota,37KBY@33090|Viridiplantae,3G9QD@35493|Streptophyta	35493|Streptophyta	L	transport inhibitor response	TIR1	GO:0000003,GO:0000151,GO:0000822,GO:0003006,GO:0003674,GO:0003824,GO:0004842,GO:0005488,GO:0005575,GO:0005622,GO:0005623,GO:0005634,GO:0006355,GO:0006464,GO:0006807,GO:0006950,GO:0007154,GO:0007165,GO:0007275,GO:0007584,GO:0008144,GO:0008150,GO:0008152,GO:0009267,GO:0009555,GO:0009605,GO:0009653,GO:0009719,GO:0009725,GO:0009733,GO:0009734,GO:0009755,GO:0009791,GO:0009889,GO:0009890,GO:0009892,GO:…	-	ko:K14485	ko04075,map04075	-	-	-	ko00000,ko00001,ko04121	-	-	-	F-box,F-box-like,LRR_6
file_1_file_1_jg4662.t1	71139.XP_010038168.1	5.62e-153	436	2C248@1|root,2R3Z2@2759|Eukaryota,37RIS@33090|Viridiplantae,3GD3A@35493|Streptophyta	35493|Streptophyta	S	kinase interacting family protein	-	GO:0005575,GO:0005622,GO:0005623,GO:0005634,GO:0005635,GO:0005737,GO:0005773,GO:0005774,GO:0012505,GO:0016020,GO:0031090,GO:0031965,GO:0031967,GO:0031975,GO:0043226,GO:0043227,GO:0043229,GO:0043231,GO:0044422,GO:0044424,GO:0044428,GO:0044437,GO:0044444,GO:0044446,GO:0044464,GO:0098588,GO:0098805	-	-	-	-	-	-	-	-	-	-	KIP1
file_1_file_1_jg4663.t1	3988.XP_002520688.1	0.000274	46.6	2CPP6@1|root,2R28V@2759|Eukaryota,383TH@33090|Viridiplantae,3GRPU@35493|Streptophyta	35493|Streptophyta	-	-	-	-	-	-	-	-	-	-	-	-	-	-	-
file_1_file_1_jg4664.t1	71139.XP_010065304.1	7.53e-234	648	COG2072@1|root,KOG1399@2759|Eukaryota,37HT1@33090|Viridiplantae,3G8FC@35493|Streptophyta	35493|Streptophyta	Q	monooxygenase	-	GO:0003674,GO:0003824,GO:0004497,GO:0007154,GO:0007165,GO:0008150,GO:0008152,GO:0009058,GO:0009719,GO:0009725,GO:0009735,GO:0009741,GO:0009742,GO:0009755,GO:0009850,GO:0009851,GO:0009889,GO:0009987,GO:0010033,GO:0010600,GO:0010817,GO:0014070,GO:0016491,GO:0016705,GO:0016709,GO:0019222,GO:0023052,GO:0031323,GO:0031326,GO:0032350,GO:0032870,GO:0033993,GO:0042221,GO:0042445,GO:0042446,GO:0043401,GO:…	1.14.13.168	ko:K11816	ko00380,ko01100,map00380,map01100	-	R10181	RC00866	ko00000,ko00001,ko01000	-	-	-	FMO-like,K_oxygenase,Pyr_redox_3
file_1_file_1_jg4666.t1	71139.XP_010039271.1	0	889	28JYJ@1|root,2RG5M@2759|Eukaryota,37RA8@33090|Viridiplantae,3G9F2@35493|Streptophyta	35493|Streptophyta	K	Auxin response factors (ARFs) are transcriptional factors that bind specifically to the DNA sequence 5'-TGTCTC-3' found in the auxin-responsive promoter elements (AuxREs)	-	-	-	ko:K14486	ko04075,map04075	-	-	-	ko00000,ko00001	-	-	-	AUX_IAA,Auxin_resp,B3
file_1_file_1_jg4666.t2	71139.XP_010039271.1	0	906	28JYJ@1|root,2RG5M@2759|Eukaryota,37RA8@33090|Viridiplantae,3G9F2@35493|Streptophyta	35493|Streptophyta	K	Auxin response factors (ARFs) are transcriptional factors that bind specifically to the DNA sequence 5'-TGTCTC-3' found in the auxin-responsive promoter elements (AuxREs)	-	-	-	ko:K14486	ko04075,map04075	-	-	-	ko00000,ko00001	-	-	-	AUX_IAA,Auxin_resp,B3
file_1_file_1_jg4666.t3	71139.XP_010039271.1	0	889	28JYJ@1|root,2RG5M@2759|Eukaryota,37RA8@33090|Viridiplantae,3G9F2@35493|Streptophyta	35493|Streptophyta	K	Auxin response factors (ARFs) are transcriptional factors that bind specifically to the DNA sequence 5'-TGTCTC-3' found in the auxin-responsive promoter elements (AuxREs)	-	-	-	ko:K14486	ko04075,map04075	-	-	-	ko00000,ko00001	-	-	-	AUX_IAA,Auxin_resp,B3
file_1_file_1_jg4667.t1	71139.XP_010038154.1	2.54e-95	281	2AKSF@1|root,2S1XK@2759|Eukaryota,37VJN@33090|Viridiplantae,3GJHT@35493|Streptophyta	35493|Streptophyta	-	-	-	-	-	-	-	-	-	-	-	-	-	-	-
file_1_file_1_jg4668.t1	71139.XP_010038156.1	2.74e-87	266	COG1028@1|root,KOG0725@2759|Eukaryota,37NDT@33090|Viridiplantae,3GCFV@35493|Streptophyta	35493|Streptophyta	Q	Enoyl-(Acyl carrier protein) reductase	-	-	-	-	-	-	-	-	-	-	-	-	adh_short_C2
file_1_file_1_jg4669.t1	71139.XP_010038163.1	3.24e-43	145	2CZY7@1|root,2SC3W@2759|Eukaryota,37XQA@33090|Viridiplantae,3GM9P@35493|Streptophyta	35493|Streptophyta	-	-	-	-	-	-	-	-	-	-	-	-	-	-	-
file_1_file_1_jg4670.t1	71139.XP_010038165.1	6.98e-286	788	KOG4270@1|root,KOG4270@2759|Eukaryota,37NKK@33090|Viridiplantae,3G82D@35493|Streptophyta	35493|Streptophyta	T	rho GTPase-activating protein	-	-	-	ko:K20642	-	-	-	-	ko00000,ko04131	-	-	-	PBD,RhoGAP
file_1_file_1_jg4671.t1	71139.XP_010038153.1	2.3e-276	758	COG5100@1|root,KOG2834@2759|Eukaryota,37NXY@33090|Viridiplantae,3GCYN@35493|Streptophyta	35493|Streptophyta	UY	npl4-like protein	-	GO:0003674,GO:0005488,GO:0005515,GO:0005575,GO:0005622,GO:0005623,GO:0005634,GO:0005737,GO:0005829,GO:0006508,GO:0006511,GO:0006807,GO:0008150,GO:0008152,GO:0009056,GO:0009057,GO:0009987,GO:0019538,GO:0019899,GO:0019941,GO:0030163,GO:0031625,GO:0032182,GO:0043130,GO:0043170,GO:0043226,GO:0043227,GO:0043229,GO:0043231,GO:0043632,GO:0044237,GO:0044238,GO:0044248,GO:0044257,GO:0044260,GO:0044265,GO:…	-	ko:K14015	ko04141,map04141	M00400,M00403	-	-	ko00000,ko00001,ko00002	-	-	-	NPL4,UN_NPL4
file_1_file_1_jg4672.t1	71139.XP_010038151.1	0	1919	COG5537@1|root,KOG2011@2759|Eukaryota,37ITF@33090|Viridiplantae,3GC90@35493|Streptophyta	35493|Streptophyta	D	sister-chromatid cohesion protein	-	GO:0000003,GO:0000280,GO:0000819,GO:0005575,GO:0005622,GO:0005623,GO:0005634,GO:0005694,GO:0006996,GO:0007049,GO:0007059,GO:0007062,GO:0007127,GO:0007135,GO:0008150,GO:0008608,GO:0009987,GO:0016043,GO:0022402,GO:0022414,GO:0043226,GO:0043227,GO:0043228,GO:0043229,GO:0043231,GO:0043232,GO:0044424,GO:0044464,GO:0045132,GO:0045143,GO:0045144,GO:0048285,GO:0051177,GO:0051276,GO:0051316,GO:0051321,GO:…	-	ko:K06671	ko04110,ko04111,ko04113,map04110,map04111,map04113	-	-	-	ko00000,ko00001,ko03036	-	-	-	STAG
file_1_file_2_29435_t	71139.XP_010038151.1	2.44e-171	512	COG5537@1|root,KOG2011@2759|Eukaryota,37ITF@33090|Viridiplantae,3GC90@35493|Streptophyta	35493|Streptophyta	D	sister-chromatid cohesion protein	-	GO:0000003,GO:0000280,GO:0000819,GO:0005575,GO:0005622,GO:0005623,GO:0005634,GO:0005694,GO:0006996,GO:0007049,GO:0007059,GO:0007062,GO:0007127,GO:0007135,GO:0008150,GO:0008608,GO:0009987,GO:0016043,GO:0022402,GO:0022414,GO:0043226,GO:0043227,GO:0043228,GO:0043229,GO:0043231,GO:0043232,GO:0044424,GO:0044464,GO:0045132,GO:0045143,GO:0045144,GO:0048285,GO:0051177,GO:0051276,GO:0051316,GO:0051321,GO:…	-	ko:K06671	ko04110,ko04111,ko04113,map04110,map04111,map04113	-	-	-	ko00000,ko00001,ko03036	-	-	-	STAG
file_1_file_1_jg4673.t1	71139.XP_010038150.1	2.49e-270	753	KOG0310@1|root,KOG0310@2759|Eukaryota,37JF9@33090|Viridiplantae,3G8B8@35493|Streptophyta	35493|Streptophyta	S	U3 small nucleolar RNA-associated protein	-	GO:0000151,GO:0005575,GO:0005622,GO:0005623,GO:0005634,GO:0005730,GO:0006139,GO:0006364,GO:0006396,GO:0006725,GO:0006807,GO:0007275,GO:0008150,GO:0008152,GO:0009553,GO:0009561,GO:0009987,GO:0010467,GO:0016070,GO:0016072,GO:0022613,GO:0031461,GO:0031974,GO:0031981,GO:0032501,GO:0032502,GO:0032991,GO:0034470,GO:0034641,GO:0034660,GO:0042254,GO:0043170,GO:0043226,GO:0043227,GO:0043228,GO:0043229,GO:…	-	ko:K14549	ko03008,map03008	-	-	-	ko00000,ko00001,ko03009	-	-	-	UTP15_C,WD40
file_1_file_1_jg4674.t1	71139.XP_010038149.1	0	1101	KOG4197@1|root,KOG4197@2759|Eukaryota,37T5S@33090|Viridiplantae,3G8PZ@35493|Streptophyta	35493|Streptophyta	O	pentatricopeptide repeat-containing protein At2g22410, mitochondrial-like	-	-	-	-	-	-	-	-	-	-	-	-	PPR,PPR_2
file_1_file_1_jg4675.t1	71139.XP_010038146.1	3.47e-22	97.4	COG0667@1|root,KOG1575@2759|Eukaryota,37I2A@33090|Viridiplantae,3GDN6@35493|Streptophyta	35493|Streptophyta	C	Aldo-keto reductase-like isoform X1	-	-	-	-	-	-	-	-	-	-	-	-	Aldo_ket_red
file_1_file_1_jg4676.t1	71139.XP_010038146.1	2.06e-92	279	COG0667@1|root,KOG1575@2759|Eukaryota,37I2A@33090|Viridiplantae,3GDN6@35493|Streptophyta	35493|Streptophyta	C	Aldo-keto reductase-like isoform X1	-	-	-	-	-	-	-	-	-	-	-	-	Aldo_ket_red
file_1_file_1_jg4678.t1	71139.XP_010039962.1	3.66e-57	190	COG2072@1|root,KOG1399@2759|Eukaryota,37HT1@33090|Viridiplantae,3G8FC@35493|Streptophyta	35493|Streptophyta	Q	monooxygenase	-	-	1.14.13.168	ko:K11816	ko00380,ko01100,map00380,map01100	-	R10181	RC00866	ko00000,ko00001,ko01000	-	-	-	FMO-like,K_oxygenase,Pyr_redox_3
file_1_file_1_jg4679.t1	71139.XP_010038145.1	3.89e-243	668	COG0657@1|root,KOG1515@2759|Eukaryota,37IMM@33090|Viridiplantae,3G969@35493|Streptophyta	35493|Streptophyta	V	gibberellin receptor	GID1	GO:0000003,GO:0001101,GO:0003006,GO:0003674,GO:0003824,GO:0005488,GO:0005575,GO:0005622,GO:0005623,GO:0005634,GO:0005737,GO:0005975,GO:0007154,GO:0007165,GO:0007275,GO:0008150,GO:0008152,GO:0008289,GO:0009056,GO:0009058,GO:0009311,GO:0009312,GO:0009653,GO:0009719,GO:0009725,GO:0009739,GO:0009755,GO:0009791,GO:0009892,GO:0009908,GO:0009937,GO:0009939,GO:0009966,GO:0009967,GO:0009987,GO:0010033,GO:…	-	ko:K14493	ko04075,map04075	-	-	-	ko00000,ko00001,ko01000	-	-	-	Abhydrolase_3
file_1_file_1_jg4680.t1	71139.XP_010038144.1	0	924	KOG0266@1|root,KOG0266@2759|Eukaryota,37SIQ@33090|Viridiplantae,3GDCJ@35493|Streptophyta	35493|Streptophyta	L	LEC14B protein	-	-	-	ko:K11801	-	-	-	-	ko00000,ko04121	-	-	-	WD40
file_1_file_1_jg4680.t2	71139.XP_010038144.1	0	924	KOG0266@1|root,KOG0266@2759|Eukaryota,37SIQ@33090|Viridiplantae,3GDCJ@35493|Streptophyta	35493|Streptophyta	L	LEC14B protein	-	-	-	ko:K11801	-	-	-	-	ko00000,ko04121	-	-	-	WD40
file_1_file_2_29442_t	71139.XP_010038144.1	0	901	KOG0266@1|root,KOG0266@2759|Eukaryota,37SIQ@33090|Viridiplantae,3GDCJ@35493|Streptophyta	35493|Streptophyta	L	LEC14B protein	-	-	-	ko:K11801	-	-	-	-	ko00000,ko04121	-	-	-	WD40
file_1_file_1_jg4681.t1	71139.XP_010038143.1	5.1e-117	352	COG4886@1|root,KOG0619@2759|Eukaryota,37M5C@33090|Viridiplantae,3GFG8@35493|Streptophyta	35493|Streptophyta	S	LRR receptor-like serine threonine-protein kinase	-	-	-	-	-	-	-	-	-	-	-	-	LRRNT_2,LRR_1,LRR_6,LRR_8
file_1_file_1_jg4682.t1	71139.XP_010038143.1	1.76e-183	523	COG4886@1|root,KOG0619@2759|Eukaryota,37M5C@33090|Viridiplantae,3GFG8@35493|Streptophyta	35493|Streptophyta	S	LRR receptor-like serine threonine-protein kinase	-	-	-	-	-	-	-	-	-	-	-	-	LRRNT_2,LRR_1,LRR_6,LRR_8
file_1_file_1_jg4683.t1	71139.XP_010038139.1	1.12e-236	666	KOG4197@1|root,KOG4197@2759|Eukaryota,37RJJ@33090|Viridiplantae,3GCIW@35493|Streptophyta	35493|Streptophyta	S	Pentatricopeptide repeat-containing protein	-	GO:0003674,GO:0003676,GO:0003723,GO:0003824,GO:0004518,GO:0004519,GO:0005488,GO:0005575,GO:0005622,GO:0005623,GO:0005737,GO:0005739,GO:0006139,GO:0006725,GO:0006807,GO:0008150,GO:0008152,GO:0009451,GO:0009987,GO:0016070,GO:0016787,GO:0016788,GO:0034641,GO:0043170,GO:0043226,GO:0043227,GO:0043229,GO:0043231,GO:0043412,GO:0044237,GO:0044238,GO:0044424,GO:0044444,GO:0044464,GO:0046483,GO:0071704,GO:…	-	-	-	-	-	-	-	-	-	-	PPR,PPR_2
file_1_file_1_jg4684.t1	71139.XP_010038138.1	0	994	2CMW1@1|root,2QS9M@2759|Eukaryota,37TF8@33090|Viridiplantae,3GEDX@35493|Streptophyta	35493|Streptophyta	S	Indole-3-acetic acid-amido synthetase	-	GO:0008150,GO:0009314,GO:0009416,GO:0009628,GO:0009719,GO:0009725,GO:0009733,GO:0010033,GO:0042221,GO:0050896	-	ko:K14487	ko04075,map04075	-	-	-	ko00000,ko00001	-	-	-	DUF295,GH3
file_1_file_1_jg4685.t1	71139.XP_010038137.1	1.33e-134	384	2BZA5@1|root,2QSK6@2759|Eukaryota,37JXR@33090|Viridiplantae,3G7X2@35493|Streptophyta	35493|Streptophyta	-	-	-	-	-	-	-	-	-	-	-	-	-	-	-
file_1_file_1_jg4686.t1	71139.XP_010038136.1	2.49e-254	697	2BYJN@1|root,2QRCX@2759|Eukaryota,37NA6@33090|Viridiplantae,3G9SE@35493|Streptophyta	35493|Streptophyta	G	Belongs to the glycosyltransferase 8 family	-	-	-	-	-	-	-	-	-	-	-	-	Glyco_transf_8
file_1_file_1_jg4687.t2	71139.XP_010038135.1	4.26e-215	610	COG3145@1|root,KOG4176@2759|Eukaryota,37JV5@33090|Viridiplantae,3G9ED@35493|Streptophyta	35493|Streptophyta	L	oxidoreductase, 2OG-Fe(II) oxygenase family protein	-	-	-	-	-	-	-	-	-	-	-	-	2OG-FeII_Oxy
file_1_file_1_jg4687.t1	71139.XP_010038135.1	6.44e-273	759	COG3145@1|root,KOG4176@2759|Eukaryota,37JV5@33090|Viridiplantae,3G9ED@35493|Streptophyta	35493|Streptophyta	L	oxidoreductase, 2OG-Fe(II) oxygenase family protein	-	-	-	-	-	-	-	-	-	-	-	-	2OG-FeII_Oxy
file_1_file_1_jg4690.t1	71139.XP_010038133.1	5.31e-195	550	2CIZ2@1|root,2QUNS@2759|Eukaryota,37JSF@33090|Viridiplantae,3G7NM@35493|Streptophyta	35493|Streptophyta	-	-	-	-	-	-	-	-	-	-	-	-	-	-	-
file_1_file_2_29456_t	71139.XP_010038133.1	8.28e-233	648	2CIZ2@1|root,2QUNS@2759|Eukaryota,37JSF@33090|Viridiplantae,3G7NM@35493|Streptophyta	35493|Streptophyta	-	-	-	-	-	-	-	-	-	-	-	-	-	-	-
file_1_file_1_jg4693.t1	71139.XP_010038123.1	3.1e-158	445	COG0412@1|root,KOG3043@2759|Eukaryota,37R07@33090|Viridiplantae,3GC9H@35493|Streptophyta	35493|Streptophyta	L	1,4-beta-D-glucanase-like	-	-	3.1.1.45	ko:K01061	ko00361,ko00364,ko00623,ko01100,ko01110,ko01120,ko01130,map00361,map00364,map00623,map01100,map01110,map01120,map01130	-	R03893,R05510,R05511,R06835,R06838,R08120,R08121,R09136,R09220,R09222	RC01018,RC01906,RC01907,RC02441,RC02467,RC02468,RC02674,RC02675,RC02686	ko00000,ko00001,ko01000	-	-	-	DLH
file_1_file_1_jg4694.t1	71139.XP_010028331.1	6.05e-12	73.6	COG0515@1|root,KOG1187@2759|Eukaryota,37HHN@33090|Viridiplantae,3G8M3@35493|Streptophyta	35493|Streptophyta	T	serine threonine-protein kinase	-	-	-	-	-	-	-	-	-	-	-	-	Pkinase,Pkinase_Tyr,WAK_assoc
file_1_file_1_jg4695.t1	71139.XP_010038128.1	3.93e-42	162	2E6MX@1|root,2SDB3@2759|Eukaryota,37YVI@33090|Viridiplantae,3GN4Y@35493|Streptophyta	2759|Eukaryota	S	TMV resistance protein N-like	-	-	-	-	-	-	-	-	-	-	-	-	LRR_5,NB-ARC,TIR
file_1_file_1_jg4697.t1	71139.XP_010038122.1	2.07e-181	509	28P7N@1|root,2QVUP@2759|Eukaryota,37P3H@33090|Viridiplantae,3GC9U@35493|Streptophyta	35493|Streptophyta	S	Protein PALE CRESS	-	GO:0003674,GO:0003676,GO:0003723,GO:0005488,GO:0005515,GO:0005575,GO:0005622,GO:0005623,GO:0005737,GO:0006139,GO:0006396,GO:0006397,GO:0006725,GO:0006807,GO:0006996,GO:0007275,GO:0008150,GO:0008152,GO:0009295,GO:0009314,GO:0009416,GO:0009501,GO:0009507,GO:0009509,GO:0009513,GO:0009532,GO:0009536,GO:0009537,GO:0009570,GO:0009628,GO:0009653,GO:0009657,GO:0009658,GO:0009965,GO:0009987,GO:0010016,GO:…	-	-	-	-	-	-	-	-	-	-	-
file_1_file_1_jg4698.t1	71139.XP_010038118.1	0	1498	COG0296@1|root,KOG0470@2759|Eukaryota,37HFJ@33090|Viridiplantae,3G8XW@35493|Streptophyta	35493|Streptophyta	G	Isoamylase 2	-	GO:0000272,GO:0003674,GO:0003824,GO:0004133,GO:0004553,GO:0005575,GO:0005622,GO:0005623,GO:0005737,GO:0005975,GO:0005976,GO:0005977,GO:0005982,GO:0005983,GO:0006073,GO:0006091,GO:0006112,GO:0008150,GO:0008152,GO:0009056,GO:0009057,GO:0009058,GO:0009059,GO:0009251,GO:0009507,GO:0009536,GO:0009987,GO:0010021,GO:0015980,GO:0016052,GO:0016787,GO:0016798,GO:0019156,GO:0032991,GO:0043033,GO:0043170,GO:…	3.2.1.68	ko:K01214	ko00500,ko01100,ko01110,map00500,map01100,map01110	M00565	R09995,R11261	-	ko00000,ko00001,ko00002,ko01000	-	CBM48,GH13	-	Alpha-amylase,CBM_48
file_1_file_1_jg4699.t1	71139.XP_010038117.1	0	1326	COG5594@1|root,KOG1134@2759|Eukaryota,37KVP@33090|Viridiplantae,3GEF6@35493|Streptophyta	35493|Streptophyta	S	CSC1-like protein At4g02900	-	-	-	ko:K21989	-	-	-	-	ko00000,ko02000	-	-	-	PHM7_cyt,RSN1_7TM,RSN1_TM
file_1_file_1_jg4700.t1	71139.XP_010038116.1	0	2208	COG0386@1|root,KOG1904@1|root,KOG1651@2759|Eukaryota,KOG1904@2759|Eukaryota,37R1U@33090|Viridiplantae,3GGVX@35493|Streptophyta	35493|Streptophyta	K	HUA2-like protein	-	GO:0005575,GO:0005622,GO:0005623,GO:0005634,GO:0043226,GO:0043227,GO:0043229,GO:0043231,GO:0044424,GO:0044464	-	-	-	-	-	-	-	-	-	-	CTD_bind,GSHPx,PWWP
file_1_file_1_jg4701.t1	71139.XP_010038116.1	2.78e-97	315	COG0386@1|root,KOG1904@1|root,KOG1651@2759|Eukaryota,KOG1904@2759|Eukaryota,37R1U@33090|Viridiplantae,3GGVX@35493|Streptophyta	35493|Streptophyta	K	HUA2-like protein	-	GO:0005575,GO:0005622,GO:0005623,GO:0005634,GO:0043226,GO:0043227,GO:0043229,GO:0043231,GO:0044424,GO:0044464	-	-	-	-	-	-	-	-	-	-	CTD_bind,GSHPx,PWWP
file_1_file_1_jg4703.t1	71139.XP_010038111.1	1.2e-169	496	2CNFM@1|root,2QVXV@2759|Eukaryota,37PW0@33090|Viridiplantae,3GHFT@35493|Streptophyta	35493|Streptophyta	-	-	-	-	-	ko:K16302	-	-	-	-	ko00000,ko02000	9.A.40.3	-	-	CUE
file_1_file_1_jg4705.t1	71139.XP_010039258.1	2.78e-51	170	2CYFB@1|root,2S40F@2759|Eukaryota,37WBC@33090|Viridiplantae,3GJEI@35493|Streptophyta	35493|Streptophyta	-	-	-	-	-	-	-	-	-	-	-	-	-	-	-
file_1_file_1_jg4706.t1	71139.XP_010039376.1	2.9e-06	52.4	KOG1075@1|root,KOG1075@2759|Eukaryota,37TIF@33090|Viridiplantae,3G9IZ@35493|Streptophyta	35493|Streptophyta	L	ribonuclease H protein	-	-	-	-	-	-	-	-	-	-	-	-	RVT_1,RVT_3,zf-RVT
file_1_file_1_jg4709.t1	71139.XP_010039257.1	2.67e-171	490	COG0324@1|root,KOG1384@2759|Eukaryota,37HTT@33090|Viridiplantae,3GE3B@35493|Streptophyta	35493|Streptophyta	J	Adenylate isopentenyltransferase	-	GO:0003674,GO:0003824,GO:0005575,GO:0005622,GO:0005623,GO:0005634,GO:0005737,GO:0005739,GO:0006139,GO:0006396,GO:0006399,GO:0006400,GO:0006725,GO:0006807,GO:0008033,GO:0008150,GO:0008152,GO:0009058,GO:0009308,GO:0009451,GO:0009536,GO:0009690,GO:0009691,GO:0009824,GO:0009987,GO:0010467,GO:0010817,GO:0016070,GO:0016740,GO:0016765,GO:0034470,GO:0034641,GO:0034660,GO:0034754,GO:0042445,GO:0042446,GO:…	2.5.1.112,2.5.1.27	ko:K10760	ko00908,ko01100,ko01110,map00908,map01100,map01110	-	R04038,R08051,R08052	RC00121,RC02820	ko00000,ko00001,ko01000,ko01006	-	-	-	IPPT
file_1_file_1_jg4710.t1	71139.XP_010038110.1	6.65e-152	429	2C7U7@1|root,2QQ6J@2759|Eukaryota,37RN8@33090|Viridiplantae,3GD82@35493|Streptophyta	35493|Streptophyta	S	R3H-associated N-terminal domain	-	-	-	-	-	-	-	-	-	-	-	-	R3H,R3H-assoc
file_1_file_2_29475_t	71139.XP_010038110.1	1.56e-144	412	2C7U7@1|root,2QQ6J@2759|Eukaryota,37RN8@33090|Viridiplantae,3GD82@35493|Streptophyta	35493|Streptophyta	S	R3H-associated N-terminal domain	-	-	-	-	-	-	-	-	-	-	-	-	R3H,R3H-assoc
file_1_file_1_jg4711.t1	71139.XP_010038108.1	8.11e-79	241	COG3265@1|root,KOG3354@2759|Eukaryota,37TRD@33090|Viridiplantae,3GI9S@35493|Streptophyta	35493|Streptophyta	F	Belongs to the gluconokinase GntK GntV family	-	GO:0003674,GO:0003824,GO:0005975,GO:0006082,GO:0006793,GO:0006796,GO:0008150,GO:0008152,GO:0009056,GO:0009987,GO:0016052,GO:0016054,GO:0016301,GO:0016310,GO:0016740,GO:0016772,GO:0016773,GO:0019520,GO:0019521,GO:0019523,GO:0019752,GO:0032787,GO:0043436,GO:0044237,GO:0044238,GO:0044248,GO:0044262,GO:0044275,GO:0044281,GO:0044282,GO:0046176,GO:0046183,GO:0046316,GO:0046395,GO:0071704,GO:0072329,GO:…	2.7.1.12	ko:K00851	ko00030,ko01100,ko01110,ko01120,ko01130,ko01200,map00030,map01100,map01110,map01120,map01130,map01200	-	R01737	RC00002,RC00017	ko00000,ko00001,ko01000	-	-	-	AAA_33,SKI
file_1_file_1_jg4712.t1	71139.XP_010038106.1	1.17e-264	731	KOG1339@1|root,KOG1339@2759|Eukaryota,37Q1N@33090|Viridiplantae,3G89Y@35493|Streptophyta	35493|Streptophyta	O	Belongs to the peptidase A1 family	-	-	-	-	-	-	-	-	-	-	-	-	TAXi_C,TAXi_N
file_1_file_1_jg4714.t1	71139.XP_010069799.1	8.36e-25	102	KOG3029@1|root,KOG3029@2759|Eukaryota,37KV2@33090|Viridiplantae,3GD46@35493|Streptophyta	35493|Streptophyta	O	Prostaglandin E synthase	-	GO:0003674,GO:0003824,GO:0005488,GO:0016829,GO:0020037,GO:0033218,GO:0042277,GO:0043167,GO:0043168,GO:0043295,GO:0046906,GO:0048037,GO:0072341,GO:0097159,GO:1900750,GO:1901363,GO:1901681	5.3.99.3	ko:K05309	ko00590,ko01100,map00590,map01100	-	R02265	RC00672	ko00000,ko00001,ko01000	-	-	-	GST_C,GST_N_3
file_1_file_1_jg4715.t1	71139.XP_010038105.1	7.15e-62	193	COG1958@1|root,KOG3428@2759|Eukaryota,37USP@33090|Viridiplantae,3GIRG@35493|Streptophyta	35493|Streptophyta	A	Small nuclear ribonucleoprotein	-	GO:0000243,GO:0000245,GO:0000375,GO:0000377,GO:0000387,GO:0000398,GO:0003674,GO:0003676,GO:0003723,GO:0005488,GO:0005575,GO:0005622,GO:0005623,GO:0005634,GO:0005654,GO:0005681,GO:0005682,GO:0005684,GO:0005685,GO:0005686,GO:0005687,GO:0005689,GO:0005730,GO:0005737,GO:0005773,GO:0005774,GO:0005829,GO:0006139,GO:0006396,GO:0006397,GO:0006725,GO:0006807,GO:0008150,GO:0008152,GO:0008380,GO:0009892,GO:…	-	ko:K11087	ko03040,ko05322,map03040,map05322	M00351,M00352,M00354,M00355,M00398	-	-	ko00000,ko00001,ko00002,ko03032,ko03041	-	-	-	LSM
file_1_file_1_jg4717.t1	71139.XP_010038103.1	1.19e-198	555	28NKP@1|root,2QWKW@2759|Eukaryota,37NJD@33090|Viridiplantae,3GCDS@35493|Streptophyta	35493|Streptophyta	S	F-Box protein	-	-	-	-	-	-	-	-	-	-	-	-	F-box
file_1_file_1_jg4718.t1	71139.XP_010038102.1	3.77e-73	221	2CCYS@1|root,2S44F@2759|Eukaryota,37WA5@33090|Viridiplantae,3GJBA@35493|Streptophyta	35493|Streptophyta	S	Antifungal protein ginkbilobin-2-like	-	-	-	-	-	-	-	-	-	-	-	-	Stress-antifung
file_1_file_1_jg4719.t1	71139.XP_010038101.1	0	1488	COG1199@1|root,KOG1131@2759|Eukaryota,37KDD@33090|Viridiplantae,3GGTH@35493|Streptophyta	35493|Streptophyta	L	DNA repair helicase	-	GO:0006139,GO:0006259,GO:0006281,GO:0006725,GO:0006807,GO:0006950,GO:0006974,GO:0008150,GO:0008152,GO:0009266,GO:0009314,GO:0009408,GO:0009411,GO:0009416,GO:0009628,GO:0009987,GO:0033554,GO:0034641,GO:0043170,GO:0044237,GO:0044238,GO:0044260,GO:0046483,GO:0050896,GO:0051716,GO:0071704,GO:0090304,GO:1901360	3.6.4.12	ko:K10844	ko03022,ko03420,map03022,map03420	M00290	-	-	ko00000,ko00001,ko00002,ko01000,ko03021,ko03400	-	-	-	DEAD_2,HBB,Helicase_C_2
file_1_file_1_jg4719.t2	71139.XP_010038101.1	0	1368	COG1199@1|root,KOG1131@2759|Eukaryota,37KDD@33090|Viridiplantae,3GGTH@35493|Streptophyta	35493|Streptophyta	L	DNA repair helicase	-	GO:0006139,GO:0006259,GO:0006281,GO:0006725,GO:0006807,GO:0006950,GO:0006974,GO:0008150,GO:0008152,GO:0009266,GO:0009314,GO:0009408,GO:0009411,GO:0009416,GO:0009628,GO:0009987,GO:0033554,GO:0034641,GO:0043170,GO:0044237,GO:0044238,GO:0044260,GO:0046483,GO:0050896,GO:0051716,GO:0071704,GO:0090304,GO:1901360	3.6.4.12	ko:K10844	ko03022,ko03420,map03022,map03420	M00290	-	-	ko00000,ko00001,ko00002,ko01000,ko03021,ko03400	-	-	-	DEAD_2,HBB,Helicase_C_2
file_1_file_1_jg4720.t1	71139.XP_010038099.1	0	1015	COG0201@1|root,2QPS8@2759|Eukaryota,37S5S@33090|Viridiplantae,3G8CA@35493|Streptophyta	35493|Streptophyta	U	Belongs to the SecY SEC61-alpha family	-	GO:0005575,GO:0005622,GO:0005623,GO:0005737,GO:0006996,GO:0008104,GO:0008150,GO:0009526,GO:0009536,GO:0009657,GO:0009658,GO:0009668,GO:0009987,GO:0010027,GO:0016043,GO:0031967,GO:0031975,GO:0033036,GO:0033365,GO:0034613,GO:0043226,GO:0043227,GO:0043229,GO:0043231,GO:0044422,GO:0044424,GO:0044435,GO:0044444,GO:0044446,GO:0044464,GO:0051179,GO:0051641,GO:0061024,GO:0070727,GO:0071840,GO:0072598	-	-	-	-	-	-	-	-	-	-	SecY
file_1_file_1_jg4721.t1	71139.XP_010038098.1	6.35e-90	269	28PKI@1|root,2S0SS@2759|Eukaryota,37UVC@33090|Viridiplantae,3GJ9N@35493|Streptophyta	35493|Streptophyta	-	-	-	-	-	-	-	-	-	-	-	-	-	-	-
file_1_file_1_jg4722.t1	71139.XP_010039256.1	9.06e-175	513	KOG4197@1|root,KOG4197@2759|Eukaryota,37RJJ@33090|Viridiplantae,3GCIW@35493|Streptophyta	35493|Streptophyta	S	Pentatricopeptide repeat-containing protein	-	GO:0003674,GO:0003676,GO:0003723,GO:0003824,GO:0004518,GO:0004519,GO:0005488,GO:0005575,GO:0005622,GO:0005623,GO:0005737,GO:0005739,GO:0006139,GO:0006725,GO:0006807,GO:0008150,GO:0008152,GO:0009451,GO:0009987,GO:0016070,GO:0016787,GO:0016788,GO:0034641,GO:0043170,GO:0043226,GO:0043227,GO:0043229,GO:0043231,GO:0043412,GO:0044237,GO:0044238,GO:0044424,GO:0044444,GO:0044464,GO:0046483,GO:0071704,GO:…	-	-	-	-	-	-	-	-	-	-	PPR,PPR_2
file_1_file_2_29487_t	71139.XP_010038089.1	8.21e-246	677	COG1161@1|root,KOG2484@2759|Eukaryota,37RU9@33090|Viridiplantae,3GCID@35493|Streptophyta	35493|Streptophyta	S	Mitochondrial ribosome-associated GTPase	-	GO:0003674,GO:0003824,GO:0003924,GO:0005575,GO:0005622,GO:0005623,GO:0005737,GO:0008150,GO:0009507,GO:0009536,GO:0016462,GO:0016787,GO:0016817,GO:0016818,GO:0017111,GO:0022613,GO:0042254,GO:0043226,GO:0043227,GO:0043229,GO:0043231,GO:0044085,GO:0044424,GO:0044444,GO:0044464,GO:0071840	-	ko:K19828	-	-	-	-	ko00000,ko03009,ko03029	-	-	-	MMR_HSR1
file_1_file_1_jg4723.t1	71139.XP_010038089.1	6.45e-245	677	COG1161@1|root,KOG2484@2759|Eukaryota,37RU9@33090|Viridiplantae,3GCID@35493|Streptophyta	35493|Streptophyta	S	Mitochondrial ribosome-associated GTPase	-	GO:0003674,GO:0003824,GO:0003924,GO:0005575,GO:0005622,GO:0005623,GO:0005737,GO:0008150,GO:0009507,GO:0009536,GO:0016462,GO:0016787,GO:0016817,GO:0016818,GO:0017111,GO:0022613,GO:0042254,GO:0043226,GO:0043227,GO:0043229,GO:0043231,GO:0044085,GO:0044424,GO:0044444,GO:0044464,GO:0071840	-	ko:K19828	-	-	-	-	ko00000,ko03009,ko03029	-	-	-	MMR_HSR1
file_1_file_1_jg4723.t2	71139.XP_010038089.1	2.75e-247	682	COG1161@1|root,KOG2484@2759|Eukaryota,37RU9@33090|Viridiplantae,3GCID@35493|Streptophyta	35493|Streptophyta	S	Mitochondrial ribosome-associated GTPase	-	GO:0003674,GO:0003824,GO:0003924,GO:0005575,GO:0005622,GO:0005623,GO:0005737,GO:0008150,GO:0009507,GO:0009536,GO:0016462,GO:0016787,GO:0016817,GO:0016818,GO:0017111,GO:0022613,GO:0042254,GO:0043226,GO:0043227,GO:0043229,GO:0043231,GO:0044085,GO:0044424,GO:0044444,GO:0044464,GO:0071840	-	ko:K19828	-	-	-	-	ko00000,ko03009,ko03029	-	-	-	MMR_HSR1
file_1_file_1_jg4724.t1	71139.XP_010038091.1	1.79e-162	459	28PRU@1|root,2QQ8D@2759|Eukaryota,37JUQ@33090|Viridiplantae,3GFC9@35493|Streptophyta	35493|Streptophyta	S	Fatty-acid-binding protein	-	GO:0003674,GO:0005488,GO:0005504,GO:0005575,GO:0005622,GO:0005623,GO:0005737,GO:0005739,GO:0006082,GO:0006629,GO:0006631,GO:0008150,GO:0008152,GO:0008289,GO:0009507,GO:0009526,GO:0009532,GO:0009536,GO:0009570,GO:0009941,GO:0009987,GO:0019752,GO:0031406,GO:0031967,GO:0031975,GO:0032787,GO:0033293,GO:0036094,GO:0043167,GO:0043168,GO:0043177,GO:0043226,GO:0043227,GO:0043229,GO:0043231,GO:0043436,GO:…	-	-	-	-	-	-	-	-	-	-	Chalcone_2
file_1_file_2_29489_t	71139.XP_010038092.1	9.23e-76	228	COG0456@1|root,KOG3234@2759|Eukaryota,37MSE@33090|Viridiplantae,3GB5Z@35493|Streptophyta	35493|Streptophyta	S	N-alpha-acetyltransferase	-	GO:0003674,GO:0003824,GO:0004596,GO:0005575,GO:0005622,GO:0005623,GO:0005737,GO:0006464,GO:0006473,GO:0006474,GO:0006807,GO:0008080,GO:0008150,GO:0008152,GO:0009987,GO:0010467,GO:0016407,GO:0016410,GO:0016740,GO:0016746,GO:0016747,GO:0017196,GO:0018193,GO:0018206,GO:0019538,GO:0031248,GO:0031365,GO:0031414,GO:0031416,GO:0032991,GO:0034212,GO:0036211,GO:0043170,GO:0043412,GO:0043543,GO:0044237,GO:…	2.3.1.254	ko:K17972	-	-	-	-	ko00000,ko01000,ko03029	-	-	-	Acetyltransf_1
file_1_file_1_jg4725.t1	71139.XP_010038092.1	7.2e-120	342	COG0456@1|root,KOG3234@2759|Eukaryota,37MSE@33090|Viridiplantae,3GB5Z@35493|Streptophyta	35493|Streptophyta	S	N-alpha-acetyltransferase	-	GO:0003674,GO:0003824,GO:0004596,GO:0005575,GO:0005622,GO:0005623,GO:0005737,GO:0006464,GO:0006473,GO:0006474,GO:0006807,GO:0008080,GO:0008150,GO:0008152,GO:0009987,GO:0010467,GO:0016407,GO:0016410,GO:0016740,GO:0016746,GO:0016747,GO:0017196,GO:0018193,GO:0018206,GO:0019538,GO:0031248,GO:0031365,GO:0031414,GO:0031416,GO:0032991,GO:0034212,GO:0036211,GO:0043170,GO:0043412,GO:0043543,GO:0044237,GO:…	2.3.1.254	ko:K17972	-	-	-	-	ko00000,ko01000,ko03029	-	-	-	Acetyltransf_1
file_1_file_1_jg4726.t1	71139.XP_010038093.1	1.88e-239	665	KOG2808@1|root,KOG2808@2759|Eukaryota,37QH0@33090|Viridiplantae,3GCTS@35493|Streptophyta	35493|Streptophyta	A	pre-mRNA-splicing factor	-	GO:0000350,GO:0000375,GO:0000377,GO:0000393,GO:0000398,GO:0000956,GO:0005575,GO:0005622,GO:0005623,GO:0005634,GO:0005681,GO:0005682,GO:0005684,GO:0006139,GO:0006396,GO:0006397,GO:0006401,GO:0006402,GO:0006403,GO:0006725,GO:0006807,GO:0008150,GO:0008152,GO:0008298,GO:0008380,GO:0009056,GO:0009057,GO:0009892,GO:0009987,GO:0010467,GO:0010468,GO:0010605,GO:0010629,GO:0016043,GO:0016070,GO:0016071,GO:…	-	ko:K12817	ko03040,map03040	-	-	-	ko00000,ko00001,ko03041	-	-	-	PRP4,Prp18
file_1_file_2_29491_t	71139.XP_010038094.1	5.33e-123	362	KOG0266@1|root,KOG0266@2759|Eukaryota,37IGZ@33090|Viridiplantae,3G744@35493|Streptophyta	35493|Streptophyta	S	WD repeat-containing protein	-	GO:0000123,GO:0000151,GO:0005575,GO:0005622,GO:0005623,GO:0005634,GO:0005654,GO:0005815,GO:0005856,GO:0005929,GO:0006325,GO:0006464,GO:0006473,GO:0006475,GO:0006479,GO:0006807,GO:0006996,GO:0007275,GO:0007399,GO:0008150,GO:0008152,GO:0008213,GO:0009987,GO:0015630,GO:0016043,GO:0016569,GO:0016570,GO:0016571,GO:0016573,GO:0018022,GO:0018193,GO:0018205,GO:0018393,GO:0018394,GO:0019538,GO:0022008,GO:…	-	ko:K14963	ko04934,map04934	-	-	-	ko00000,ko00001,ko03036	-	-	-	WD40
file_1_file_1_jg4727.t1	71139.XP_010038094.1	1.29e-98	302	KOG0266@1|root,KOG0266@2759|Eukaryota,37IGZ@33090|Viridiplantae,3G744@35493|Streptophyta	35493|Streptophyta	S	WD repeat-containing protein	-	GO:0000123,GO:0000151,GO:0005575,GO:0005622,GO:0005623,GO:0005634,GO:0005654,GO:0005815,GO:0005856,GO:0005929,GO:0006325,GO:0006464,GO:0006473,GO:0006475,GO:0006479,GO:0006807,GO:0006996,GO:0007275,GO:0007399,GO:0008150,GO:0008152,GO:0008213,GO:0009987,GO:0015630,GO:0016043,GO:0016569,GO:0016570,GO:0016571,GO:0016573,GO:0018022,GO:0018193,GO:0018205,GO:0018393,GO:0018394,GO:0019538,GO:0022008,GO:…	-	ko:K14963	ko04934,map04934	-	-	-	ko00000,ko00001,ko03036	-	-	-	WD40
file_1_file_1_jg4728.t2	71139.XP_010039253.1	1.55e-205	594	COG0475@1|root,KOG1650@2759|Eukaryota,37RFT@33090|Viridiplantae,3GF22@35493|Streptophyta	35493|Streptophyta	P	cation H( ) antiporter	-	-	-	-	-	-	-	-	-	-	-	-	Na_H_Exchanger
file_1_file_1_jg4728.t1	71139.XP_010039253.1	0	1202	COG0475@1|root,KOG1650@2759|Eukaryota,37RFT@33090|Viridiplantae,3GF22@35493|Streptophyta	35493|Streptophyta	P	cation H( ) antiporter	-	-	-	-	-	-	-	-	-	-	-	-	Na_H_Exchanger
file_1_file_1_jg4729.t1	71139.XP_010038095.1	1.25e-65	206	2E3F0@1|root,2RZ63@2759|Eukaryota,37UUP@33090|Viridiplantae,3GIV6@35493|Streptophyta	35493|Streptophyta	-	-	-	-	-	-	-	-	-	-	-	-	-	-	-
file_1_file_1_jg4731.t1	3641.EOX94728	1.12e-54	184	2B249@1|root,2S0BX@2759|Eukaryota,37UTC@33090|Viridiplantae,3GJ4M@35493|Streptophyta	35493|Streptophyta	S	transcription repressor	-	-	-	-	-	-	-	-	-	-	-	-	Ovate
file_1_file_1_jg4733.t1	71139.XP_010038097.1	3e-150	429	2AMXX@1|root,2QS8T@2759|Eukaryota,37MN7@33090|Viridiplantae,3GHAE@35493|Streptophyta	35493|Streptophyta	S	zinc-finger of the FCS-type, C2-C2	MARD1	GO:0000003,GO:0000932,GO:0001101,GO:0003006,GO:0005575,GO:0005622,GO:0005623,GO:0005737,GO:0007275,GO:0008150,GO:0009719,GO:0009725,GO:0009737,GO:0009791,GO:0010033,GO:0010154,GO:0010162,GO:0010431,GO:0010494,GO:0021700,GO:0022414,GO:0022611,GO:0032501,GO:0032502,GO:0032504,GO:0032991,GO:0033993,GO:0035770,GO:0036464,GO:0042221,GO:0043226,GO:0043228,GO:0043229,GO:0043232,GO:0044424,GO:0044444,GO:…	-	-	-	-	-	-	-	-	-	-	zf-FLZ
file_1_file_1_jg4734.t1	71139.XP_010065054.1	9.88e-90	273	2CHKB@1|root,2S3PH@2759|Eukaryota,37W1E@33090|Viridiplantae,3GKFN@35493|Streptophyta	35493|Streptophyta	K	(NAC) domain-containing protein	-	-	-	-	-	-	-	-	-	-	-	-	NAM
file_1_file_1_jg4735.t1	71139.XP_010065054.1	6.43e-122	356	2CHKB@1|root,2S3PH@2759|Eukaryota,37W1E@33090|Viridiplantae,3GKFN@35493|Streptophyta	35493|Streptophyta	K	(NAC) domain-containing protein	-	-	-	-	-	-	-	-	-	-	-	-	NAM
file_1_file_1_jg4736.t1	71139.XP_010038088.1	3.14e-28	103	KOG4117@1|root,KOG4117@2759|Eukaryota,37VZJ@33090|Viridiplantae,3GK5U@35493|Streptophyta	35493|Streptophyta	KO	Heat shock factor-binding protein 1-like	-	-	-	ko:K19765	ko04212,map04212	-	-	-	ko00000,ko00001	-	-	-	HSBP1
file_1_file_1_jg4737.t1	3694.POPTR_0026s00240.1	3.06e-34	121	2BQ63@1|root,2S1TF@2759|Eukaryota,37WA4@33090|Viridiplantae,3GK5X@35493|Streptophyta,4JQPE@91835|fabids	35493|Streptophyta	S	Rapid ALkalinization Factor (RALF)	-	GO:0003674,GO:0005102,GO:0005179,GO:0005488,GO:0005515,GO:0005575,GO:0005576,GO:0005618,GO:0005623,GO:0005911,GO:0007154,GO:0007165,GO:0007267,GO:0008150,GO:0009505,GO:0009506,GO:0009719,GO:0009725,GO:0009741,GO:0009966,GO:0009987,GO:0010033,GO:0010469,GO:0010646,GO:0014070,GO:0019722,GO:0019932,GO:0023051,GO:0023052,GO:0030054,GO:0030312,GO:0030545,GO:0033993,GO:0035556,GO:0040008,GO:0042221,GO:…	-	-	-	-	-	-	-	-	-	-	RALF
file_1_file_1_jg4739.t1	71139.XP_010039245.1	3.2e-145	419	COG5190@1|root,KOG0323@2759|Eukaryota,37JYQ@33090|Viridiplantae,3G7ZC@35493|Streptophyta	35493|Streptophyta	K	RNA polymerase II C-terminal domain phosphatase-like	-	-	3.1.3.16	ko:K18999	-	-	-	-	ko00000,ko01000,ko01009,ko03021	-	-	-	NIF
file_1_file_1_jg4741.t1	71139.XP_010039245.1	3.58e-144	416	COG5190@1|root,KOG0323@2759|Eukaryota,37JYQ@33090|Viridiplantae,3G7ZC@35493|Streptophyta	35493|Streptophyta	K	RNA polymerase II C-terminal domain phosphatase-like	-	-	3.1.3.16	ko:K18999	-	-	-	-	ko00000,ko01000,ko01009,ko03021	-	-	-	NIF
file_1_file_1_jg4743.t1	71139.XP_010039245.1	1.42e-54	182	COG5190@1|root,KOG0323@2759|Eukaryota,37JYQ@33090|Viridiplantae,3G7ZC@35493|Streptophyta	35493|Streptophyta	K	RNA polymerase II C-terminal domain phosphatase-like	-	-	3.1.3.16	ko:K18999	-	-	-	-	ko00000,ko01000,ko01009,ko03021	-	-	-	NIF
file_1_file_1_jg4744.t1	71139.XP_010038086.1	1.33e-248	688	KOG3914@1|root,KOG3914@2759|Eukaryota,37RY5@33090|Viridiplantae,3GF94@35493|Streptophyta	35493|Streptophyta	J	Required for the formation of N(7)-methylguanine at position 46 (m7G46) in tRNA. In the complex, it is required to stabilize and induce conformational changes of the catalytic subunit	-	GO:0005575,GO:0005622,GO:0005623,GO:0005634,GO:0005737,GO:0005829,GO:0006139,GO:0006396,GO:0006399,GO:0006400,GO:0006725,GO:0006807,GO:0008033,GO:0008150,GO:0008152,GO:0009451,GO:0009987,GO:0010467,GO:0016070,GO:0032991,GO:0034470,GO:0034641,GO:0034660,GO:0034708,GO:0043170,GO:0043226,GO:0043227,GO:0043229,GO:0043231,GO:0043412,GO:0043527,GO:0044237,GO:0044238,GO:0044424,GO:0044444,GO:0044464,GO:…	-	ko:K15443	-	-	-	-	ko00000,ko03016	-	-	-	WD40
file_1_file_2_29510_t	71139.XP_010038086.1	1.27e-274	755	KOG3914@1|root,KOG3914@2759|Eukaryota,37RY5@33090|Viridiplantae,3GF94@35493|Streptophyta	35493|Streptophyta	J	Required for the formation of N(7)-methylguanine at position 46 (m7G46) in tRNA. In the complex, it is required to stabilize and induce conformational changes of the catalytic subunit	-	GO:0005575,GO:0005622,GO:0005623,GO:0005634,GO:0005737,GO:0005829,GO:0006139,GO:0006396,GO:0006399,GO:0006400,GO:0006725,GO:0006807,GO:0008033,GO:0008150,GO:0008152,GO:0009451,GO:0009987,GO:0010467,GO:0016070,GO:0032991,GO:0034470,GO:0034641,GO:0034660,GO:0034708,GO:0043170,GO:0043226,GO:0043227,GO:0043229,GO:0043231,GO:0043412,GO:0043527,GO:0044237,GO:0044238,GO:0044424,GO:0044444,GO:0044464,GO:…	-	ko:K15443	-	-	-	-	ko00000,ko03016	-	-	-	WD40
file_1_file_1_jg4745.t1	71139.XP_010038082.1	1.34e-76	232	2AR61@1|root,2RZKK@2759|Eukaryota,37UR9@33090|Viridiplantae,3GIVS@35493|Streptophyta	35493|Streptophyta	S	Belongs to the plant LTP family	-	-	-	-	-	-	-	-	-	-	-	-	LTP_2
file_1_file_1_jg4746.t1	71139.XP_010038081.1	3.38e-59	189	2B1PY@1|root,2S0AW@2759|Eukaryota,37V0D@33090|Viridiplantae,3GINR@35493|Streptophyta	35493|Streptophyta	O	Belongs to the plant LTP family	-	-	-	-	-	-	-	-	-	-	-	-	LTP_2
file_1_file_1_jg4747.t1	71139.XP_010038081.1	2.77e-49	168	2B1PY@1|root,2S0AW@2759|Eukaryota,37V0D@33090|Viridiplantae,3GINR@35493|Streptophyta	35493|Streptophyta	O	Belongs to the plant LTP family	-	-	-	-	-	-	-	-	-	-	-	-	LTP_2
file_1_file_1_jg4748.t1	71139.XP_010038078.1	9.49e-87	260	2B1PY@1|root,2S0AW@2759|Eukaryota,37V0D@33090|Viridiplantae,3GINR@35493|Streptophyta	35493|Streptophyta	O	Belongs to the plant LTP family	-	GO:0005575,GO:0005623,GO:0005886,GO:0016020,GO:0031224,GO:0031225,GO:0031226,GO:0044425,GO:0044459,GO:0044464,GO:0046658,GO:0071944	-	-	-	-	-	-	-	-	-	-	LTP_2
file_1_file_1_jg4749.t1	4096.XP_009776170.1	3.57e-11	60.5	2E6GR@1|root,2R8ZU@2759|Eukaryota,38ASU@33090|Viridiplantae,3GWE5@35493|Streptophyta,44UHI@71274|asterids	35493|Streptophyta	S	Pollen allergen ole e 6	-	-	-	-	-	-	-	-	-	-	-	-	Ole-e-6
file_1_file_1_jg4750.t1	71139.XP_010038077.1	2.74e-26	103	COG0198@1|root,KOG1708@2759|Eukaryota,37WF0@33090|Viridiplantae,3GX5A@35493|Streptophyta	35493|Streptophyta	J	Belongs to the universal ribosomal protein uL24 family	-	-	-	ko:K02895	ko03010,map03010	M00178,M00179	-	-	br01610,ko00000,ko00001,ko00002,ko03011	-	-	-	KOW,ribosomal_L24
file_1_file_1_jg4751.t1	71139.XP_010038076.1	7.37e-50	163	2CZF0@1|root,2SA2Y@2759|Eukaryota,37WSC@33090|Viridiplantae,3GMF2@35493|Streptophyta	35493|Streptophyta	S	zinc-finger of the FCS-type, C2-C2	-	-	-	-	-	-	-	-	-	-	-	-	zf-FLZ
file_1_file_1_jg4752.t1	71139.XP_010039612.1	3.87e-182	523	COG4677@1|root,2QPZF@2759|Eukaryota,37P8C@33090|Viridiplantae,3G9BM@35493|Streptophyta	35493|Streptophyta	G	Acts in the modification of cell walls via demethylesterification of cell wall pectin	-	GO:0003674,GO:0003824,GO:0004857,GO:0005575,GO:0005623,GO:0008150,GO:0016787,GO:0016788,GO:0030234,GO:0030599,GO:0043086,GO:0044092,GO:0044464,GO:0046910,GO:0050790,GO:0052689,GO:0065007,GO:0065009,GO:0071944,GO:0098772	3.1.1.11	ko:K01051	ko00040,ko01100,map00040,map01100	M00081	R02362	RC00460,RC00461	ko00000,ko00001,ko00002,ko01000	-	-	-	PMEI,Pectinesterase
file_1_file_1_jg4755.t1	71139.XP_010038074.1	0	979	COG5411@1|root,KOG0565@2759|Eukaryota,37S50@33090|Viridiplantae,3G88W@35493|Streptophyta	35493|Streptophyta	U	Type I inositol 1,4,5-trisphosphate 5-phosphatase	-	GO:0003674,GO:0003824,GO:0004439,GO:0006629,GO:0006644,GO:0006650,GO:0006793,GO:0006796,GO:0008150,GO:0008152,GO:0009987,GO:0016311,GO:0016787,GO:0016788,GO:0016791,GO:0019637,GO:0030258,GO:0034485,GO:0034593,GO:0034594,GO:0034595,GO:0042578,GO:0044237,GO:0044238,GO:0044255,GO:0046486,GO:0046488,GO:0046839,GO:0046856,GO:0052866,GO:0071704,GO:0106019	3.1.3.36	ko:K01099,ko:K20279	ko00562,ko01100,ko04070,map00562,map01100,map04070	-	R04404,R09827	RC00078	ko00000,ko00001,ko01000,ko04131	-	-	-	Exo_endo_phos
file_1_file_1_jg4756.t1	71139.XP_010038072.1	5.45e-74	226	2CXRA@1|root,2RZ7X@2759|Eukaryota,37UUW@33090|Viridiplantae,3GIKR@35493|Streptophyta	35493|Streptophyta	S	UPF0690 protein C1orf52 homolog	-	-	-	-	-	-	-	-	-	-	-	-	-
file_1_file_1_jg4756.t2	71139.XP_010038072.1	6.79e-79	239	2CXRA@1|root,2RZ7X@2759|Eukaryota,37UUW@33090|Viridiplantae,3GIKR@35493|Streptophyta	35493|Streptophyta	S	UPF0690 protein C1orf52 homolog	-	-	-	-	-	-	-	-	-	-	-	-	-
file_1_file_2_29521_t	71139.XP_010038071.1	3.63e-289	793	COG0484@1|root,KOG0715@2759|Eukaryota,37NYV@33090|Viridiplantae,3GD3K@35493|Streptophyta	35493|Streptophyta	O	dnaJ homolog 1	-	GO:0005575,GO:0005622,GO:0005623,GO:0005737,GO:0009507,GO:0009526,GO:0009534,GO:0009535,GO:0009536,GO:0009579,GO:0009941,GO:0016020,GO:0031967,GO:0031975,GO:0031976,GO:0031984,GO:0034357,GO:0042651,GO:0043226,GO:0043227,GO:0043229,GO:0043231,GO:0044422,GO:0044424,GO:0044434,GO:0044435,GO:0044436,GO:0044444,GO:0044446,GO:0044464,GO:0055035	-	ko:K03686	-	-	-	-	ko00000,ko03029,ko03110	-	-	-	DnaJ,DnaJ_C,DnaJ_CXXCXGXG
file_1_file_1_jg4757.t1	71139.XP_010038071.1	6.28e-81	254	COG0484@1|root,KOG0715@2759|Eukaryota,37NYV@33090|Viridiplantae,3GD3K@35493|Streptophyta	35493|Streptophyta	O	dnaJ homolog 1	-	GO:0005575,GO:0005622,GO:0005623,GO:0005737,GO:0009507,GO:0009526,GO:0009534,GO:0009535,GO:0009536,GO:0009579,GO:0009941,GO:0016020,GO:0031967,GO:0031975,GO:0031976,GO:0031984,GO:0034357,GO:0042651,GO:0043226,GO:0043227,GO:0043229,GO:0043231,GO:0044422,GO:0044424,GO:0044434,GO:0044435,GO:0044436,GO:0044444,GO:0044446,GO:0044464,GO:0055035	-	ko:K03686	-	-	-	-	ko00000,ko03029,ko03110	-	-	-	DnaJ,DnaJ_C,DnaJ_CXXCXGXG
file_1_file_1_jg4758.t1	71139.XP_010038069.1	0	2157	2C248@1|root,2QQ6M@2759|Eukaryota,37RJW@33090|Viridiplantae,3G86G@35493|Streptophyta	35493|Streptophyta	S	Kinase interacting (KIP1-like) family protein	-	GO:0005575,GO:0005623,GO:0005886,GO:0016020,GO:0044464,GO:0071944	-	ko:K20478	-	-	-	-	ko00000,ko04131	-	-	-	KIP1
file_1_file_2_29523_t	71139.XP_010038068.1	2.01e-272	755	KOG0589@1|root,KOG0589@2759|Eukaryota,37HWZ@33090|Viridiplantae,3G7J2@35493|Streptophyta	35493|Streptophyta	T	serine threonine-protein kinase	-	-	2.7.11.1	ko:K08857	-	-	-	-	ko00000,ko01000,ko01001,ko03036,ko03400	-	-	-	Pkinase
file_1_file_1_jg4759.t1	71139.XP_010038068.1	0	1062	KOG0589@1|root,KOG0589@2759|Eukaryota,37HWZ@33090|Viridiplantae,3G7J2@35493|Streptophyta	35493|Streptophyta	T	serine threonine-protein kinase	-	-	2.7.11.1	ko:K08857	-	-	-	-	ko00000,ko01000,ko01001,ko03036,ko03400	-	-	-	Pkinase
file_1_file_1_jg4760.t1	71139.XP_010038067.1	2.42e-176	502	2C1JZ@1|root,2QTB1@2759|Eukaryota,37PWR@33090|Viridiplantae,3GDSJ@35493|Streptophyta	35493|Streptophyta	-	-	-	-	-	-	-	-	-	-	-	-	-	-	2OG-FeII_Oxy
file_1_file_1_jg4761.t1	3760.EMJ20545	1.73e-18	84	2E2V1@1|root,2SA1A@2759|Eukaryota,37WWS@33090|Viridiplantae,3GM25@35493|Streptophyta,4JV0D@91835|fabids	35493|Streptophyta	-	-	-	-	-	-	-	-	-	-	-	-	-	-	-
file_1_file_1_jg4763.t1	3641.EOY22961	3.38e-17	80.1	2E2V1@1|root,2SA1A@2759|Eukaryota,37WWS@33090|Viridiplantae,3GM25@35493|Streptophyta	35493|Streptophyta	-	-	-	-	-	-	-	-	-	-	-	-	-	-	-
file_1_file_1_jg4765.t1	71139.XP_010038065.1	4.81e-265	737	28JID@1|root,2QRT3@2759|Eukaryota,37T8Q@33090|Viridiplantae,3GGCZ@35493|Streptophyta	35493|Streptophyta	S	Auxin canalisation	-	GO:0003002,GO:0007154,GO:0007165,GO:0007275,GO:0007389,GO:0008150,GO:0009719,GO:0009725,GO:0009733,GO:0009734,GO:0009755,GO:0009888,GO:0009987,GO:0010033,GO:0010051,GO:0010087,GO:0010305,GO:0023052,GO:0032501,GO:0032502,GO:0032870,GO:0042221,GO:0048856,GO:0050789,GO:0050794,GO:0050896,GO:0051716,GO:0065007,GO:0070887,GO:0071310,GO:0071365,GO:0071495	-	-	-	-	-	-	-	-	-	-	Auxin_canalis,PH_2
file_1_file_1_jg4767.t1	71139.XP_010038064.1	6.19e-154	434	COG0670@1|root,KOG2322@2759|Eukaryota,37JCA@33090|Viridiplantae,3G72Y@35493|Streptophyta	35493|Streptophyta	T	Belongs to the BI1 family	-	GO:0000902,GO:0006950,GO:0006952,GO:0007154,GO:0007165,GO:0008150,GO:0009605,GO:0009607,GO:0009620,GO:0009653,GO:0009719,GO:0009725,GO:0009741,GO:0009742,GO:0009755,GO:0009826,GO:0009987,GO:0010033,GO:0010941,GO:0014070,GO:0016043,GO:0016049,GO:0022603,GO:0023052,GO:0032502,GO:0032870,GO:0032989,GO:0033993,GO:0040007,GO:0042221,GO:0043207,GO:0043401,GO:0048519,GO:0048523,GO:0048545,GO:0048589,GO:…	-	ko:K06890	-	-	-	-	ko00000	-	-	-	Bax1-I
file_1_file_1_jg4768.t1	71139.XP_010038063.1	0	1662	28HBY@1|root,2QPQB@2759|Eukaryota,37NM8@33090|Viridiplantae,3G8U4@35493|Streptophyta	35493|Streptophyta	S	ETO1-like protein 1	EOL1	GO:0006521,GO:0008150,GO:0009889,GO:0010364,GO:0010565,GO:0010817,GO:0019222,GO:0031323,GO:0031326,GO:0031335,GO:0032350,GO:0033238,GO:0042762,GO:0046885,GO:0050789,GO:0050794,GO:0051171,GO:0062012,GO:0065007,GO:0065008,GO:0080090,GO:1900908,GO:1900911	-	-	-	-	-	-	-	-	-	-	BTB,TPR_7,TPR_8
file_1_file_1_jg4769.t1	71139.XP_010038060.1	0	1878	COG0631@1|root,KOG0698@2759|Eukaryota,37K47@33090|Viridiplantae,3G85E@35493|Streptophyta	35493|Streptophyta	T	phosphatase 2C	-	GO:0003674,GO:0003824,GO:0004672,GO:0004674,GO:0005575,GO:0005622,GO:0005623,GO:0005634,GO:0005737,GO:0006464,GO:0006468,GO:0006793,GO:0006796,GO:0006807,GO:0007154,GO:0007165,GO:0008150,GO:0008152,GO:0009987,GO:0010468,GO:0016301,GO:0016310,GO:0016740,GO:0016772,GO:0016773,GO:0019222,GO:0019538,GO:0023052,GO:0035556,GO:0036211,GO:0043170,GO:0043226,GO:0043227,GO:0043229,GO:0043231,GO:0043412,GO:…	3.1.3.16	ko:K17505	-	-	-	-	ko00000,ko01000,ko01009	-	-	-	PP2C,Pkinase
file_1_file_1_jg4770.t1	71139.XP_010038060.1	6.92e-06	51.6	COG0631@1|root,KOG0698@2759|Eukaryota,37K47@33090|Viridiplantae,3G85E@35493|Streptophyta	35493|Streptophyta	T	phosphatase 2C	-	GO:0003674,GO:0003824,GO:0004672,GO:0004674,GO:0005575,GO:0005622,GO:0005623,GO:0005634,GO:0005737,GO:0006464,GO:0006468,GO:0006793,GO:0006796,GO:0006807,GO:0007154,GO:0007165,GO:0008150,GO:0008152,GO:0009987,GO:0010468,GO:0016301,GO:0016310,GO:0016740,GO:0016772,GO:0016773,GO:0019222,GO:0019538,GO:0023052,GO:0035556,GO:0036211,GO:0043170,GO:0043226,GO:0043227,GO:0043229,GO:0043231,GO:0043412,GO:…	3.1.3.16	ko:K17505	-	-	-	-	ko00000,ko01000,ko01009	-	-	-	PP2C,Pkinase
file_1_file_1_jg4771.t1	71139.XP_010038060.1	8.81e-42	153	COG0631@1|root,KOG0698@2759|Eukaryota,37K47@33090|Viridiplantae,3G85E@35493|Streptophyta	35493|Streptophyta	T	phosphatase 2C	-	GO:0003674,GO:0003824,GO:0004672,GO:0004674,GO:0005575,GO:0005622,GO:0005623,GO:0005634,GO:0005737,GO:0006464,GO:0006468,GO:0006793,GO:0006796,GO:0006807,GO:0007154,GO:0007165,GO:0008150,GO:0008152,GO:0009987,GO:0010468,GO:0016301,GO:0016310,GO:0016740,GO:0016772,GO:0016773,GO:0019222,GO:0019538,GO:0023052,GO:0035556,GO:0036211,GO:0043170,GO:0043226,GO:0043227,GO:0043229,GO:0043231,GO:0043412,GO:…	3.1.3.16	ko:K17505	-	-	-	-	ko00000,ko01000,ko01009	-	-	-	PP2C,Pkinase
[truncated: 27,511 more rows]

## Sheet: Table S5
Table S5. KEGG pathways identified from Rhodomyrtus tomentosa genes.
Pathways	count
[truncated: 422 more rows]

## Sheet: Table S6
Table S6. Statistics of orthologous gene analysis per species.
[truncated: 11 more rows]

[truncated: 7 more sheets: Table S7, Table S8, Table S9, Table S10, Table S11, Table S12, Table S13]
